# Supplementary material for: Open sesame: Identification of sesame oil and oil soot ink in organic deposits of Tang Dynasty lamps from Astana necropolis in China
Source: PLoS One. 2017 Feb 24;12(2):e0158636. doi: 10.1371/journal.pone.0158636 (PMC5325208; doi:10.1371/journal.pone.0158636)
Supplement: S1 Dataset — (XLS) [file pone.0158636.s001.xls]

## Sheet: sequence_report_table
	Supplementary Dataset 1S
	List of identified proteins
Sample name	Identified protein1	Gene Identifier	Molecular Weight, Da	MASCOT protein score	N of matched spectra	N of matched unique peptides	Sequence coverage	Protein sequence	A-index2	Sequences of matched peptides
	Sample 1#, dish periphery
	17.9mg
	Animal proteins
	collagens
20140707-tam107n	collagen alpha-1(I) chain-like [Camelus ferus][Vicugna pacos]	gi%7c560897104 gi%7c560993185	136844	1960	3800	39	0.3	MFSFVDLRLLLLLAATALLTHGQEEGQEGQEGQEEDIPPVTCVQNGLRYYDRDVWKPVPCQICVCDNGNVLCDDVICDEIKNCPGAKAPPGECCPVCPDGEASPTDQETTGVEGPKGDTGPRGPRNFAPQMSYGYDEKSTGISVPGPMGPSGPRGLPGPPGAPGPQGFQGPPGEPGEPGSSGPMGPRGPPGPPGKNGDDGEAGKPGRPGERGPPGPQGARGLPGTAGLPGMKGHRGFSGLDGAKGDAGPAGPKGEPGSPGENGAPGQMGPRGLPGERGRPGAPGPAGARGNDGATGAAGPPGPTGPAGPPGFPGAVGAKGEAGPQGARGSEGPQGVRGEPGPPGPAGAAGPAGNPGADGQPGAKGANGAPGIAGAPGFPGARGPSGPQGPSGPPGPKGN…	97.4359	STGISVPGPMGPSGPR-GFSGLDGAK-GFSGLDGAKGDAGPAGPK-GDAGPAGPK-GEAGPQGAR-GEAGPQGARGSEGPQGVR-GSEGPQGVR-GPSGPQGPSGPPGPK-GFPGADGVAGPK-GSPGPAGPK-GQAGVMGFPGPK-GVPGPPGAVGPAGK-GVPGPPGAVGPAGKDGEAGAQGPPGPAGPAGER-DGEAGAQGPPGPAGPAGER-GVQGPPGPAGPR-GDRGDAGPK-GADGSPGKDGVR-GLTGPIGPPGPAGAPGDKGETGPSGPAGPTGAR-GETGPSGPAGPTGAR-GSAGPPGATGFPGAAGR-GAPGADGPAGAPGTPGPQGIAGQR-GVVGLPGQR-GVVGLPGQRGER-GFPGLPGPSGEPGK-QGPSGPNGER-GPPGP…	#
20140707-tam107n	collagen alpha-1 type I chain [Equus asinus]	gi%7c221665286	138912	1912	2333	36	0.28	MFSFVDLRLLLLLAATALLTHGQEEGQEEGQEEDIPAVTCIQDGLRYHDRAVWKPEPCRVCICDNGNVLCDDVICEDTKNCPGASVPKDECCPVCPEGQVSPTDDQTTGVEGPKGDTGPRGPRGPAGPPGRDGIPGQPGLPGPPGPPGPPGPPGLGGNFAPQLSYGYDEKSAGISVPGPMGPSGPRGLPGPPGAPGPQGFQGPPGEPGEPGASGPMGPRGPPGPPGKNGDDGEAGKPGRPGERGPPGPQGARGLPGTAGLPGMKGHRGFSGLDGAKGDAGPAGPKGEPGSPGENGAPGQMGPRGLPGERGRPGAPGPAGARGNDGATGAAGPPGPTGPAGPPGFPGAVGAKGEAGPQGARGSEGPQGVRGEPGPPGPAGAAGPAGNPGADGQPGAKGAN…	64.8056	SAGISVPGPMGPSGPR-GFSGLDGAK-GFSGLDGAKGDAGPAGPK-GDAGPAGPK-GEAGPQGAR-GEAGPQGARGSEGPQGVR-GSEGPQGVR-GPSGPQGPSGPPGPK-GFPGADGVAGPK-GQAGVMGFPGPK-GVPGPPGAVGPAGK-GVPGPPGAVGPAGKDGEAGAQGPPGPAGPAGER-DGEAGAQGPPGPAGPAGER-GVQGPPGPAGPR-GDRGDAGPK-GADGSPGKDGVR-GLTGPIGPPGPAGAPGDKGETGPSGPAGPTGAR-GETGPSGPAGPTGAR-GSAGPPGATGFPGAAGR-GSPGADGPAGAPGTPGPQGIAGQR-GVVGLPGQR-GVVGLPGQRGER-GFPGLPGPSGEPGK-GFPGLPGPSGEPGKQGPSGASGER-Q…	#
20140707-tam107n	collagen alpha-1(I) chain precursor [Bos taurus]	gi%7c77404252 gi%7c109891947 gi%7c75775290 gi%7c296476458	138854	1860	3809	35	0.27	MFSFVDLRLLLLLAATALLTHGQEEGQEEGQEEDIPPVTCVQNGLRYHDRDVWKPVPCQICVCDNGNVLCDDVICDELKDCPNAKVPTDECCPVCPEGQESPTDQETTGVEGPKGDTGPRGPRGPAGPPGRDGIPGQPGLPGPPGPPGPPGPPGLGGNFAPQLSYGYDEKSTGISVPGPMGPSGPRGLPGPPGAPGPQGFQGPPGEPGEPGASGPMGPRGPPGPPGKNGDDGEAGKPGRPGERGPPGPQGARGLPGTAGLPGMKGHRGFSGLDGAKGDAGPAGPKGEPGSPGENGAPGQMGPRGLPGERGRPGAPGPAGARGNDGATGAAGPPGPTGPAGPPGFPGAVGAKGEGGPQGPRGSEGPQGVRGEPGPPGPAGAAGPAGNPGADGQPGAKGAN…	108.829	STGISVPGPMGPSGPR-GFSGLDGAK-GFSGLDGAKGDAGPAGPK-GDAGPAGPK-GEGGPQGPRGSEGPQGVR-GSEGPQGVR-GPSGPQGPSGPPGPK-GFPGADGVAGPK-GQAGVMGFPGPK-GVPGPPGAVGPAGK-GVPGPPGAVGPAGKDGEAGAQGPPGPAGPAGER-DGEAGAQGPPGPAGPAGER-GVQGPPGPAGPR-GDRGDAGPK-GADGAPGKDGVR-GEAGPSGPAGPTGAR-GSAGPPGATGFPGAAGR-GAPGADGPAGAPGTPGPQGIAGQR-GVVGLPGQR-GVVGLPGQRGER-GFPGLPGPSGEPGK-GFPGLPGPSGEPGKQGPSGASGER-QGPSGASGER-GPPGPMGPPGLAGPPGESGR-EGAPGAEGSPGR-…	#
20140707-tam107n	collagen_ type VI_ alpha 3-like isoform 2 [Bos taurus]	gi%7c296488812	319127	1871	229	34	0.16	MRKHRHLPLVAILCLFFSGFSFTRGQQQPAQDSADIIFLIDGSNNTGSVNFAVILDFLVNLLERLSIGTQQIRVGVVQYSDEPRTMFSLNSYSTKAQVLDAVKALGFIGGELANVGLALDFVVENHFTRAGGSRAEEGVPQVLVLISAGPSSDEIRDGVIALKQASVFSFGLGAQAASKAELQHIATNDNLVFTVPEFRSLGDVQEQLLPYIVGVAQRHIVLQPPTIVTQVIEVNKRDIVFLVDGSSKLGLTNFNAIRDFIAKVIQRLEIRQDLIQVAVAQYADTVRPEFYFNTYPSKREVINAVRKMKALDGSALYTGSALDFVRNNLFTEAAGYRAAEGVPKLLVLVTGGKSLDAVSQPAQELKRSGILAFAVGNKVADQAELEEIAFDSSLVFTAT…	6.73529	LGLTNFNAIRDFIAK-SGILAFAVGNK-ALNLGYALDYAQR-IEDGVLQFLVLLVAGK-QSGVVPFILQAK-NADPAELELIVPSPAFILVAESLPK-IGDLQPQIVNLLK-VVESLDVGPDR-GLTLLGGPAPNTGAALEFVLR-IAEGVPQLLIVLTADR-DVVFLIDGSQSAGPEFQYIR-LVDYLDVGFDTTR-QVNVGGALEYVAR-IEEGVPQFLVLISSGK-QFGVAPLTIAR-ISLSPEYVFSVNTFR-LLTPLTTLTAGQIQQLLASTR-IGVLQFSNDVFPEFQLK-SQASVLDAIR-ALEFVAR-IEDGVPQHLVLFLGGK-DSFQEVLR-VGLEHLR-LDQRVPQIAFVITGGK-VPQIAFVITGGK-VSVVALTPSGPVEAFDFAE…	#
20140707-tam107n	collagen alpha-3(VI) chain [Camelus ferus]	gi%7c560902967	347898	1513	200	27	0.11	MRKHRHLPMKVAIFCLFFSGFSFTRAQQQADVKNGAAADIIFLVDSSWSIGKEHFQLVREFLYDVIKSLAVGENDFRFALVQFNGNPHTEFLLNTYRTKQEVLSHVSNMSYTGGSNQTGQGLKRVMQNHLSKAAGSRASAGVPQVVVVLTSGHSEDGLALPSAELKSADVNVFAVGVEDADEGALKEIASEPLDMHVFNLENFTSLHDIVGTLVSCVRSSSMTPGRAGGTETLKDITAQDSADIIFLIDGSNNTGSVNFAVIRDFLVNLLERLSVGTQQIRVGVVQYSDEPRTMFSLNTYSTKAQVLDAVKALGFLGGELANVGLALEFLVENHFTQAGGSRAEEGVPQVLVLISAGPSSDEVRDGVVALKQASVFSFGLGAQAASKAELQHIATNDNL…	7.40741	DFLVNLLER-TAPLQGLLPSVLAPLR-ALNLGYALDYAQR-IEDGVLQFLVLLVAGR-QSGVVPFILQAK-NADPAELELIVPSPAFILVAESLPK-VGDLQPQIVNLLK-VVESLDVGPDR-LTLLGGPTPNTGASLAFVLR-IAEGVPQLLIVLTADR-DVVFLIDGSQSAGPEFQYIR-LVDYLDVGFDTTR-IEEGVPQFLVLISSGK-ISLSPEYVFSVSTFR-LLTPITTLTSEQIQQILATTR-IGVVQFSNDVFPEFYLK-SQASVLDAIR-ALEFVAR-IEDGVPQHLVLFLGGK-DSFQEVLR-VGLEHLR-VPQIAFVITGGK-ASEELRQEGVR-ALILVGLER-VANLEQLMQLEFGR-LNLLDLDYELAEQLDNIAEK-QQSLET…	#
20140707-tam107n	collagen alpha-3(VI) chain [Equus caballus]	gi%7c338725684	342323	1394	178	27	0.11	MRKHRHLPLVAIFYLFLSSFSFTRAQQQADVKNGAAADIIFLVDSSWSIGKEHFQLVREFLYDVIKSLAVGENDFHFALVQFNGNPHTEFLLNTYRTKQEVLSHISNMSYIGGSNQTGKGLEYVMQTHLTQAAGSRASDGVPQVIVVLTDGHSEDGLALPTAELKSADVNVFAIGVEDADEGALKEIASEPLNMHVFNLENFTSLHDIVGNLVSCVHSSVTPGRAGDTGTLKDITAQDSADIIFLIDGSNNTGSVNFAVIRDFLVNLLERLSIGTQQIRVGVVQYSDEPRTMFSLDTYSTKAQVLDAVKALGFTGGELANVGLALDFVVENHFTRAGGSRVEEGVPQVLVLISAGPSSDEIRDGVVALKQASVFSFGLGAQAASKAELQQIATNDNMVF…	6.59259	DFLVNLLER-AADKAELEEIAFDPTLVFIPAEFR-IAPLQGMLPSLLAPLR-ALNLGYALDYAQR-IEDGVLQFLVLLVAGR-NADPAELELIVPSPAFILTAESLPK-IGDLQPQIVNLLK-VVESLDVGPDR-IEEGVPQLLIVLTAER-LVDYLDVGFDTTR-IEEGVPQFLVLISSGK-ISLSPEYVFSVSTFR-IGVVQFSNEVFPEFYLK-IEDGVPQHLVLFLGGK-DSFQEVLR-VGIEHLR-LNHFVPEAGSR-LDQRVPQIAFVITGGK-VPQIAFVITGGK-GLEAQVDTILNR-VVIHFTDGVDGDLADLQR-ASEELRQEGVR-ALILVGLER-LNLLDLDYELAEQLDNIAEK-VAVVTYNNEVTTEIR-LSDAGITPLFLTR-S…	#
20140707-tam107n	collagen alpha-2(I) chain-like [Mustela putorius furo]	gi%7c511896650 gi%7c511941215	129372	879	559	21	0.19	MLSFVDTRTLLLLAVTSCLATCQSLQEVTARKGPVGDRGPRGERGPPGPPGRDGDDGIPGPPGPPGPPGPPGLGGIFAAQYDPGKGVGLGPGPMGLMGPRGPPGASGAPGPQGFQGPAGEPGEPGQTGPAGARGPPGPPGKAGEDGHPGKPGRPGERGVVGPQGARGFPGTPGLPGFKGIRGHNGLDGLKGQPGAPGVKGEPGAPGENGTPGQTGARGLPGERGRVGAPGPAGARGSDGSVGPVGPAGPIGSAGPPGFPGAPGPKGELGPVGNPGPAGPAGPRGEVGLPGVSGPVGPPGNPGANGLTGAKGAAGLPGVAGAPGLPGPRGIPGPVGAAGATGARGLVGEPGPAGSKGESGNKGEPGSAGPQGPPGPSGEEGKRGPNGEAGSAGPSGPPGL…	26.619	GVVGPQGAR-GHNGLDGLK-VGAPGPAGAR-GELGPVGNPGPAGPAGPR-GESGNKGEPGSAGPQGPPGPSGEEGK-GESGNKGEPGSAGPQGPPGPSGEEGKR-GEPGSAGPQGPPGPSGEEGK-GPTGDPGKPGEKGHAGLAGAR-GHAGLAGAR-GERGPPGESGAAGPSGPIGSR-GPSGPPGPDGNK-GEAGPAGPAGPAGPR-GEVGPAGPNGFAGPAGAAGQPGAK-GENGPVGPTGPVGSAGPSGPNGPPGPAGSR-GDGGPPGATGFPGAAGR-GDQGPVGR-HGNRGEPGPAGSVGPVGAAGPR-GEPGPAGSVGPVGAAGPR-GPSGPQGVR-GPAGPSGPAGK-GPAGPSGPAGKDGR-	#
20140707-tam107n	Collagen alpha-2(I) chain [Bos mutus]	gi%7c440893297	129179	947	519	21	0.18	MLSFVDTRTLLLLAVTSCLATCQCKCLQLVSGSLGKSGDRGPRGERGPPGPPGRDGDDGIPGPPGPPGPPGPPGLGGNFAAQFDAKGGGPGPMGLMGPRGPPGASGAPGPQGFQGPPGEPGEPGQTGPAGARGPPGPPGKAGEDGHPGKPGRPGERGVVGPQGARGFPGTPGLPGFKGIRGHNGLDGLKGQPGAPGVKGEPGAPGENGTPGQTGARGLPGERGRVGAPGPAGARGSDGSVGPVGPAGPIGSAGPPGFPGAPGPKGELGPVGNPGPAGPAGPRGEVGLPGLSGPVGPPGNPGANGLPGAKGAAGLPGVAGAPGLPGPRGIPGPVGASGATGARGLVGEPGPAGSKGESGNKGEPGAVGQPGPPGPSGEEGKRGSTGEIGPAGPPGPPGLR…	24.7143	GGGPGPMGLMGPR-GVVGPQGAR-GHNGLDGLK-VGAPGPAGAR-GELGPVGNPGPAGPAGPR-GIPGPVGASGATGAR-AGVMGPAGSR-AGVMGPAGSRGATGPAGVR-EGPVGLPGIDGRPGPIGPAGAR-AGEKGHAGLAGAR-GHAGLAGAR-GPSGPPGPDGNK-GEAGPAGPAGPAGPR-GEVGPAGPNGFAGPAGAAGQPGAK-GDGGPPGATGFPGAAGR-GDQGPVGR-SGETGASGPPGFVGEK-GPSGPQGIR-GPAGPSGPAGK-GPAGPSGPAGKDGR-IGQPGAVGPAGIR-	#
20140707-tam107n	collagen alpha-2(I) chain isoform X2 [Equus caballus]	gi%7c545214094	128180	867	397	20	0.17	MLSFVDTRTLLLLAVTSCLATCQSLQEGPTGDRGPRGERGPPGPPGRDGDDGIPGPPGPPGPPGPPGLGGNFAAQFDAKGGGPGPMGLMGPRGPPGASGAPGPQGFQGPAGEPGEPGQTGPAGARGPPGPPGKAGEDGHPGKPGRPGERGVVGPQGARGFPGTPGLPGFKGIRGHNGLDGLKGQPGAPGVKGEPGAPGENGTPGQAGARGLPGERGRVGAPGPAGARGSDGSVGPVGPAGPIGSAGPPGFPGAPGPKGELGPVGNPGPAGPAGPRGEVGLPGLSGPVGPPGNPGANGLTGAKGAAGLPGVAGAPGLPGPRGIPGPAGAAGATGARGLVGEPGPAGSKGESGNKGEPGAAGPQGPPGPSGEEGKRGPNGEPGSTGPAGPPGLRGSPGSRG…	19.85	GGGPGPMGLMGPR-GVVGPQGAR-GHNGLDGLK-VGAPGPAGAR-GELGPVGNPGPAGPAGPR-AGVMGPAGSR-AGVMGPAGSRGASGPAGVR-GASGPAGVR-EGPVGLPGIDGRPGPIGPAGAR-GPSGEPGKPGDKGHAGLAGAR-GHAGLAGAR-GPSGPPGPDGNK-GEAGAAGPAGPAGPR-GEVGPAGPNGFAGPAGAAGQPGAK-GDQGPVGR-GEPGPVGSVGPVGAVGPR-GPSGPQGVR-GPAGPTGPVGK-GPAGPTGPVGKDGR-SGQPGTVGPAGVR-	#
20140707-tam107n	collagen alpha-1(VI) chain precursor [Bos taurus]	gi%7c219804724 gi%7c296490826	108603	764	108	15	0.15	MRLPRALLPLLLQACWASAQDDPVASRAIAFQDCPVDLFFVLDTSESVALRLKPYGALVDKVKSFTKRFIDNLNDRYYRCDRNLVWNAGALHYSDEVEIIRGLTRMPSGRDELKSSVDAVKYFGKGTYTDCAIKKGLEELLVGGSHLKENKYLVVVTDGHPLEGYKEPCGGLEDAVNEAKHLGIKVFSVAITPDHLEPRLSIIATDHTYRRNFTAADWGQSRDAEEVISQTIDTITDMIKNNVEQVCCSFECQPARGPPGPRGDPGYEGERGKPGLPGEKGEAGDPGRPGDLGPVGYQGMKGEKGSRGEKGSRGPKGYKGEKGKRGMDGVDGMKGETGFPGLPGCKGSPGFDGIQGPPGPKGDPGAFGLKGQKGEPGADGEPGRPGSTGPPGDEGEPGE…	7.2	NLVWNAGALHYSDEVEIIR-GLEELLVGGSHLK-GLEELLVGGSHLKENK-VFSVAITPDHLEPR-LSIIATDHTYR-LSIIATDHTYRR-DAEEVISQTIDTITDMIK-KLQWMGGGTFTGEALQYTR-LQWMGGGTFTGEALQYTR-IALVITDGR-VAVVQYSGTGQQRPER-AGVEIFAVVVGR-AAEYDVVFGER-VPSYQALLR-GVFYQTVSR-	#
20140707-tam107n	Collagen alpha-2(VI) chain [Bos mutus][Bos taurus]	gi%7c440900496 gi%7c528938209	108441	601	86	14	0.16	MLRSPCSALLLWGLLGAVHAQQQEVISPGPSDRNSCPEKADCPVHVYFVLDTSESITMQSPTDSLLYHMQQFVLQFISQLQDELYLDQVALSWRYGGLHFSDLVEVFSPPGSDRASFTKSLQSISSFRRGTFTDCMLANMTQEVRRHVGKGVVNFAVVITDGHVTGSPCGGIKLQAERAREEGIRLFAVPPNLKLNEQGLRDIANTPHELYRNNYATMRPDSTEIDQDTINRIIKVMKHEAYGECYKVSCLEIPGPPGPKGYRGQKGAKGNMGEPGEPGQKGRQGDPGIEGPIGFPGPKGVPGFKGEKGEFGADGRKGAPGLAGKNGTDGQKGKLGRIGPPGCKGDTGDRGPDGYVGEAGSPGERGDQGSKGDPGRPGRRGPPGENGAKGSKASGYQGN…	6.14286	YGGLHFSDLVEVFSPPGSDR-SLQSISSFR-NFVINVVNR-VGVVQYSHEGTFEAIQLDDER-VGVVQYSHEGTFEAIQLDDERIDSLSSFK-EAVKNLEWIAGGTWTPSALK-NLEWIAGGTWTPSALK-VFAVVITDGR-RFVEEVSR-FVEEVSR-VALLQFGGPR-YLNSFSHVGTGIVQAINQVVQGAR-ISLGDPAAVFR-EKDYDSLAQPGFFDR-	#
20140707-tam107n	collagen alpha-1(VI) chain [Myotis brandtii]	gi%7c554569471	96326	645	103	12	0.14	MRLAHALLPLLLQACWASAQDLPAAERAIAFQDCPVDLFFVLDTSESVALRLKPYGALVDKVKAFTKRFIDNLKDRYYRCDRNLVWNAGALHYSDEVEIIQGLTRMPSGRDALKASVDAVKYFGKGTYTDCAIKKGLEELLVGGSHLKENKYLIVVTDGHPLEGYKEPCGGLEDAVNEAKHLGIKVFSVAITPDHLEPRLSIIATDHTYRRNFTAADWGQSRDAEEVISQTIDTITDMIKNNVEQVCCSFECQPARGPPGPRGDPGYEGERGKPGLPGEKGEAGDPGRPGDLGPVGYQGMKGEKGSRGEKGSRGPKGYKGEKGKRGIDGVDGMKGEMGYPGLPGCKGSPGFDGVQGPPGPKGDAGAFGLKGEKGEPGADGEPGRPGSTGSPGDEGDPGE…	8.58333	NLVWNAGALHYSDEVEIIQGLTR-GLEELLVGGSHLK-GLEELLVGGSHLKENK-VFSVAITPDHLEPR-LSIIATDHTYR-LSIIATDHTYRR-DAEEVISQTIDTITDMIK-IALVITDGR-ENYAELLEDAFLK-TAEYDVAFGER-VPSYQALLR-GVFYQTVSR-	#
20140707-tam107n	collagen alpha-5(VI) chain [Bos taurus]	gi%7c528900285	286906	312	15	7	0.04	MKILLIIFVPLFWTKTLSYQSPGPGPEYADVVFLMDSSDHLGIKSFPFVKTFINKMISSLPIEADKYHVGLAQYSDGLHREFLLSAFKSRGPMLNHLKKNFGFLGGSLRIGKALQEVHRAYFSSGRDRKQFPPILVVLASGESEDAVEEAAEALRKDGVRIVSVGIQGASEKTLKAMATGQFHYRLRTVRDLSAFSQNMTQILKDAAQYKDGTAYSDIEVPFPRACKKDSIADLMFLVDEAVGTTENLRLLQNFLKNITSSMDVQDSCLRLGLMSYSDRVETVSPLSSSTTQSEFQEQIQKLSLRAGKSSAGAAIDQLRRKGFSAAHGSRRAQGVPQIAVLVTDRPSDDSVREVALDLRLQDVTVLALGIEGANKTQLEEIVSYPPEQTISMLQSYADL…	2.14286	QFPPILVVLASGESEDAVEEAAEALR-KDSIADLMFLVDEAVGTTENLR-TGAALDFMLPLMR-SAGVPQTLVVITSGGPR-LQSYLPSILEDITSIR-DIITSIVNDLHIR-IALLSYSPWDR-	#
20140707-tam107n	collagen type I alpha 1 [Sebastiscus marmoratus]	gi%7c262357108	13884	61	36	2	0.14	GIVGLPGQRGERGFPGMPGPSGESGKPGPSGPSGERGPSGPMGPVGLAGAPGEPGREGSPGSEGTVGRDGAAGPKGDRGESGPSGAPGAPGPSGAPGPVGPAGKNGDRGETGPSGPAGSAGPSGPRGPAGAAGLRGDKGETGEAGERGMKGHR	18	NGDRGETGPSGPAGSAGPSGPR-GETGPSGPAGSAGPSGPR-	#
20140707-tam107n	hypothetical protein PANDA_007210 [Ailuropoda melanoleuca]collagen	gi%7c281351911	135600	292	257	6	0.06	AVDGGCSHLGQSYADRDVWKPEPCQICVCDSGSVLCDDIICDEQELDCPNPEIPFGECCAVCPQPPSAPPRPPNGHGPQGPKGDPGPPGIPGRNGDPGIPGQPGSPGSPGPPGICESCPTGPQNYSPQFESYDVKAGVGGGGIAGYPGPAGPPGPPGPPGTSGHPGSPGSPGYQGPPGEPGQAGPAGPPGPPGAIGPSGPAGKDGESGRPGRPGERGLPGPPGMKGPAGMPGFPGMKGHRGFDGRNGEKGDTGAPGLKGENGLPGENGAPGPMGPRGAPGERGRPGLPGAAGARGNDGARGSDGQPGPPGPPGTAGFPGSPGAKGEVGPAGSPGSSGSPGQRGEPGPQGHAGAPGPPGPPGSNGSPGGKGEMGPAGIPGAPGLIGARGPPGPAGTNGAP…	42.8333	GEVGPAGSPGSSGSPGQR-GEMGPAGIPGAPGLIGAR-GGPGGPGPQGPAGK-GSPGPQGPPGAPGPLGIAGITGAR-GPAGPQGPR-GPVGPSGPPGK-	#
	bone, sinew, cartilage- associated
20140707-tam107n	vimentin [Bos taurus]	gi%7c110347570 gi%7c555959742 gi%7c594056443 gi%7c146291097 gi%7c109659186 gi%7c296481436	53695	693	94	16	0.31	MSTRSVSSSSYRRMFGGPGTASRPSSTRSYVTTSTRTYSLGSALRPTTSRTLYTSSPGGVYATRSSAVRLRSGVPGVRLLQDSVDFSLADAINTEFKNTRTNEKVELQELNDRFANYIDKVRFLEQQNKILLAELEQLKGQGKSRLGDLYEEEMRELRRQVDQLTNDKARVEVERDNLAEDIMRLREKLQEEMLQREEAESTLQSFRQDVDNASLARLDLERKVESLQEEIAFLKKLHDEEIQELQAQIQEQHVQIDMDVSKPDLTAALRDVRQQYESVAAKNLQEAEEWYKSKFADLSEAANRNNDALRQAKQESNEYRRQVQTLTCEVDALKGTNESLERQMREMEENFSVEAANYQDTIGRLQDEIQNMKEEMARHLREYQDLLNVKMALDIEIAT…	5.875	TYSLGSALRPTTSR-TLYTSSPGGVYATR-FANYIDK-ILLAELEQLK-ILLAELEQLKGQGK-LGDLYEEEMR-LGDLYEEEMRELR-VEVERDNLAEDIMR-DNLAEDIMR-EEAESTLQSFR-KVESLQEEIAFLK-KVESLQEEIAFLKK-NLQEAEEWYK-EYQDLLNVK-MALDIEIATYR-ISLPLPNFSSLNLR-	#
20140707-tam107n	mimecan isoform X1 [Camelus ferus]	gi%7c560927813 gi%7c560927815 gi%7c560973912 gi%7c560973914	33923	744	298	14	0.4	MKTLQSTLLLFLFVPLIKPAPPAQQDSRIIYDYGTDNFEETLFSQDYEDKYLDGKRTKEKETVIPDEKSFQLQKDQSVTPPPPKKENDEMPTCLLCVCLSGSVYCEEVDIDAVPPLPKESAYLYARFNRIKKLTAKDFADIPNLRRLDFTGNLIEDIEDGTFSKLSLLEELTLAENQLLKLPVLPPKLTLFNAKYNKIKSRGIKANAFKKLHNLSFLYLDHNALESVPLNLPESLRVIHLQFNNITSITDDTFCKANDTSYIRDRIEEIRLEGNPIVLGKHPNSFICLKRLPVGSYI	21.2857	ESAYLYAR-LTAKDFADIPNLR-DFADIPNLR-RLDFTGNLIEDIEDGTFSK-LDFTGNLIEDIEDGTFSK-LSLLEELTLAENQLLK-LSLLEELTLAENQLLKLPVLPPK-LPVLPPK-LTLFNAK-LHNLSFLYLDHNALESVPLNLPESLR-DRIEEIRLEGNPIVLGK-IEEIRLEGNPIVLGK-LEGNPIVLGK-RLPVGSYI-	#
20140707-tam107n	lumican precursor [Bos taurus]	gi%7c27806853 gi%7c528948247 gi%7c1708876 gi%7c163267 gi%7c74354899 gi%7c296487971	38732	731	539	12	0.31	MNLGVFPLLLALIGGASSTYPDYYEYYDFPQALYGRSSPNCAPECNCPESYPSAMYCDELKLKSVPMVPPGIKYLYLRNNQIDHIDDKAFENVTDLQWLILDHNLLENSKIKGKVFSKLKQLKKLHINYNNLTESVGPLPKSLVDLQLTNNKISKLGSFDGLVNLTFIHLQHNQLKEDAVSAALKGLKSLEYLDLSFNQMTKLPSGLPVSLLTLYLDNNKISNIPDEYFKRFSALQYLRLSHNELADSGVPGNSFNVSSLLELDLSYNKLKSIPTVNENLENYYLEVNELEKFDVKSFCKILGPLSYSKIKHLRLDGNHITQTSLPPDMYECLRVANEITVN	44.9167	SVPMVPPGIK-SLVDLQLTNNK-SLVDLQLTNNKISK-SLEYLDLSFNQMTK-LPSGLPVSLLTLYLDNNK-LPSGLPVSLLTLYLDNNKISNIPDEYFK-LPSGLPVSLLTLYLDNNKISNIPDEYFKR-ISNIPDEYFK-FSALQYLR-SIPTVNENLENYYLEVNELEK-SIPTVNENLENYYLEVNELEKFDVK-ILGPLSYSK-	#
20140707-tam107n	lumican [Camelus ferus][Vicugna pacos]	gi%7c560909048 gi%7c560950821	38497	643	453	11	0.32	MNLGVFTLLLALVGGANGYYYEDYDFPLSIYGRSSPNCAPECNCPESYPSAMYCDELKLKSVPMVPPGIKYLYLRNNQIDHIDDKAFENVTDLQWLILDHNLLENSKIKGRVFSKLKQLKKLHINYNNLTESVGPLPKSLVDLQLTNNKISKLGSLDGLVNLTFIHLQHNQLKEDTVSAAFKGLKGLEYLDLSFNQMTKLPSGLPVSLLTLYLDNNKISNIPDEYFKRFNGLQYLRLSHNELADSGIPGNSFNLSSLLELDLSYNKLKNIPTVNENLENYYLEVNELEKFEVKSFCKILGPLSYSKIKHLRLDGNRLTHTSLPPDMYECLRVANEITVN	41.1818	SVPMVPPGIK-SLVDLQLTNNK-SLVDLQLTNNKISK-GLEYLDLSFNQMTK-LPSGLPVSLLTLYLDNNK-LPSGLPVSLLTLYLDNNKISNIPDEYFK-LPSGLPVSLLTLYLDNNKISNIPDEYFKR-ISNIPDEYFK-FNGLQYLR-NIPTVNENLENYYLEVNELEKFEVK-ILGPLSYSK-	#
20140707-tam107n	decorin isoform X1 [Capra hircus][Pantholops hodgsonii][Ovis aries][Bos taurus]	gi%7c548464653 gi%7c556727728 gi%7c556727730 gi%7c57163969 gi%7c21542182 gi%7c6006725 gi%7c76253701 gi%7c528948241 gi%7c555996829 gi%7c555996831 gi%7c594078640 gi%7c594078642 gi%7c68845449 gi%7c54660107 gi%7c59858517 gi%7c75775323 gi%7c296487969 gi%7c440892792	39883	683	392	10	0.36	MKAAIIFLLVAQVSWAGPFQQKGLFDFMLEDEASGIGPEERFHEVPELEPMGPVCPFRCQCHLRVVQCSDLGLEKVPKDLPPDTALLDLQNNKITEIKDGDFKNLKNLHTLILINNKISKISPGAFAPLVKLERLYLSKNQLKELPEKMPKTLQELRVHENEITKVRKSVFNGLNQMIVVELGTNPLKSSGIENGAFQGMKKLSYIRIADTNITTIPQGLPPSLTELHLDGNKITKVDAASLKGLNNLAKLGLSFNSISAVDNGSLANTPHLRELHLNNNKLVKVPGGLADHKYIQVVYLHNNNISAIGSNDFCPPGYNTKKASYSGVSLFSNPVQYWEIQPSTFRCVYVRAAVQLGNYK	39.2	DLPPDTALLDLQNNKITEIKDGDFK-NLHTLILINNK-NLHTLILINNKISK-ISPGAFAPLVK-KSVFNGLNQMIVVELGTNPLK-SVFNGLNQMIVVELGTNPLK-SSGIENGAFQGMK-LGLSFNSISAVDNGSLANTPHLR-KASYSGVSLFSNPVQYWEIQPSTFR-ASYSGVSLFSNPVQYWEIQPSTFR-	#
20140707-tam107n	decorin isoform X1 [Camelus ferus] [Vicugna pacos]	gi%7c560909040 gi%7c560909042 gi%7c560950823 gi%7c560950825	39817	683	357	10	0.36	MKATIIFLLVAQVSWAGPFQQKGLFDFMLEDEASGIGPEDRFPDVSELEPLGPVCPFRCQCHLRVVQCSDLGLEKVPKDLPPDTALLDLQNNKITEIKDGDFKNLKNLHTLILINNKISKISPGAFAPLVKLERLYLSKNQLKELPEKMPKTLQELRAHENEITKVRKAVFNGLNQMIVVELGTNPLKSSGIENGAFQGMKKLSYIRIADTNITTIPQGLPPSLTELHLDGNKITKVDATSLKGLNNLAKLGLSFNSISAVDNGSLANTPHLRELHLNNNKLIKVPGGLADHKYIQVVYLHNNNISAVGSNDFCPPGYNTKKASYSGVSLFSNPVQYWEIQPSTFRCVYVRSAIQLGNFK	35.7	DLPPDTALLDLQNNKITEIKDGDFK-NLHTLILINNK-NLHTLILINNKISK-ISPGAFAPLVK-KAVFNGLNQMIVVELGTNPLK-AVFNGLNQMIVVELGTNPLK-SSGIENGAFQGMK-LGLSFNSISAVDNGSLANTPHLR-KASYSGVSLFSNPVQYWEIQPSTFR-ASYSGVSLFSNPVQYWEIQPSTFR-	#
20140707-tam107n	prolargin [Camelus ferus]	gi%7c560903774	43099	309	65	8	0.23	MRSSFYWLLPLVLILASEAQGQATRRPRPRPRPRPRPRLRPTPSFPQPHEPSEPTDLPPPLPPGPPSVFPDCPRECYCPSDFPSALYCDSRNLRKVPVIPSRIHYLYLQNNFITELPLESFRNASGLRWINLDNNRIRKIDQKVLEKLPSLVFLYMEKNQLEEVPSALPRNLEQLRLSQNQISRIPPGVFSKLENLLLLDLQHNKLSDGVFKPDTFQGLKNLMQLNLANNILRKMPPKVPTAIHQLYLDSNRIETIPSGYFKGFPNLAFIRLNYNKLSDRGLPKNSFNLSNLLVLHLSHNKISNVPAINNRLEHLSIEINGTQICPNDVVAFHDFSSDLENVPHLRYLRLDGNYLKPPIPLDLMMCFRLLQSVVI	8.125	KVPVIPSR-IHYLYLQNNFITELPLESFR-VLEKLPSLVFLYMEK-LPSLVFLYMEK-LPSLVFLYMEKNQLEEVPSALPR-LENLLLLDLQHNK-IETIPSGYFK-GFPNLAFIR-	#
20140707-tam107n	asporin isoform 1 [Camelus ferus][Orcinus orca] [Sus scrofa][Physeter catodon][Balaenoptera acutorostrata scammoni]	gi%7c466079675 gi%7c545815606 gi%7c560927809 gi%7c593731638 gi%7c594668853	42343	152	11	4	0.14	MKEYVLLVFLTLCSAKPLFHPSYLTLKNMMLKDMEDEGDSDAKNSLFPTREPINPFFPFDLFPTCPFGCQCYSRVVHCSDLGLSSVPSNIPFDTRMVDLQNNKIMEIKENDFKGLISLYALILNNNKLTKIHPKAFQTTKKLRRLYLSHNQLSEIPLNLPKSLAELRIHDNKVKKIQKETFKGMNSLHVLEMSANPLDNNGIEPGAFEGVTVFHIRIAEAKLTSIPKELPSTLLELHLDYNKISTVELEDFKRYKDLQRLGLGNNRITDIENGSLANIPRVREIHLENNKLKKIPSGLQELKYLQIIFLHSNSITKVGVNDFCPTVPKMKKSLYSAISLFNNPVKYWEVQPATFRCVLSRMSVQLGNFRK	2.75	LYLSHNQLSEIPLNLPK-YLQIIFLHSNSITK-SLYSAISLFNNPVK-YWEVQPATFR-	#
20140707-tam107n	periostin [Capra hircus][Ovis aries][Otolemur garnettii][Pantholops hodgsonii]	gi%7c395856753 gi%7c426236401 gi%7c548488192 gi%7c556764971gi%7c586973400	91297	200	9	4	0.08	MFGAKNSELASPNKPFWQCYLGRPNVCALQQILGTKKKYFSTCRNWYQGAICGKKTTVLYECCPGYMRMEGMKGCPAVLPIDHVYGTLGIVGATTTQSYSDVSKLREEIEGKGSFTYFAPSNDAWDNLDSDIRRGLESNVNVELLNALHSHMVNKRMLTKDLKNGMIIPSMYNNLGLFINHYPNGVVTVNCARIIHGNQIATNGVVHVIDRVLTQIGTSIQDFIEAEDELSSFRAAAITSDILEALGRDGHFTLFAPTNEAFEKLPRGVLERIMGDKVASEALMKYHILNTLQCSEAIMGGAVFETLEGNTIEIGCDGDSITVNGIKMVNKKDIVTNNGVIHLIDQVLIPDSAKQVIELAGNQQTTFTDLVAQLGLASALRPDGEYTLLAPVNNAFSDD…	2.25	VLTQIGTSIQDFIEAEDELSSFR-AAAITSDILEALGR-NALQNIILYHLTPGVFIGK-GFEPGVTNILK-	#
20140707-tam107n	biglycan precursor [Bos taurus][Ovis aries][Vicugna pacos][Camelus ferus][Mesocricetus auratus][Canis lupus familiaris][Sus scrofa][Mus musculus][Oryctolagus cuniculus] [Homo sapiens]	gi%7c110350683 gi%7c529014081 gi%7c548530279 gi%7c555998748 gi%7c556723997 gi%7c94730417 gi%7c60650302 gi%7c109658403 gi%7c296471054 gi%7c440891078 gi%7c57163947 gi%7c8134614 gi%7c2655356 gi%7c560992920 gi%7c560933872 gi%7c524974346 gi%7c50979010 gi%7c3024394 gi%7c1916846 gi%7c311277155 gi%7c31127089 gi%7c307574646 gi%7c179433	41564	160	10	3	0.13	MWPLWPLAALLALSQALPFEQKAFWDFTLDDGLPMLNDEEASGAETTSGIPDLDSLPPTYSAMCPFGCHCHLRVVQCSDLGLKAVPKEISPDTTLLDLQNNDISELRKDDFKGLQHLYALVLVNNKISKIHEKAFSPLRKLQKLYISKNHLVEIPPNLPSSLVELRIHDNRIRKVPKGVFSGLRNMNCIEMGGNPLENSGFEPGAFDGLKLNYLRISEAKLTGIPKDLPETLNELHLDHNKIQAIELEDLLRYSKLYRLGLGHNQIRMIENGSLSFLPTLRELHLDNNKLSRVPAGLPDLKLLQVVYLHTNNITKVGVNDFCPVGFGVKRAYYNGISLFNNPVPYWEVQPATFRCVTDRLAIQFGNYKK	3.33333	IQAIELEDLLR-MIENGSLSFLPTLR-AYYNGISLFNNPVPYWEVQPATFR-	#
	blood-associated
20140707-tam107n	Serum albumin_Precursor [Bos taurus]	gi%7c1351907 gi%7c162648	69248	724	86	13	0.17	MKWVTFISLLLLFSSAYSRGVFRRDTHKSEIAHRFKDLGEEHFKGLVLIAFSQYLQQCPFDEHVKLVNELTEFAKTCVADESHAGCEKSLHTLFGDELCKVASLRETYGDMADCCEKQEPERNECFLSHKDDSPDLPKLKPDPNTLCDEFKADEKKFWGKYLYEIARRHPYFYAPELLYYANKYNGVFQECCQAEDKGACLLPKIETMREKVLASSARQRLRCASIQKFGERALKAWSVARLSQKFPKAEFVEVTKLVTDLTKVHKECCHGDLLECADDRADLAKYICDNQDTISSKLKECCDKPLLEKSHCIAEVEKDAIPENLPPLTADFAEDKDVCKNYQEAKDAFLGSFLYEYSRRHPEYAVSVLLRLAKEYEATLEECCAKDDPHACYSTVFDK…	6.61538	LVNELTEFAK-YLYEIAR-RHPYFYAPELLYYANK-HPYFYAPELLYYANK-DAFLGSFLYEYSR-RHPEYAVSVLLR-HPEYAVSVLLR-LGEYGFQNALIVR-KVPQVSTPTLVEVSR-VPQVSTPTLVEVSR-KQTALVELLK-QTALVELLK-LVVSTQTALA-	#
20140707-tam107n	serum albumin [Camelus ferus]	gi%7c560925137	69354	590	68	13	0.19	MKWVTFISLLFLFSSVYSRGVFRRDTHKSEIAHRFKDLGEDDFKGLVLIAFSQYLQQCPFDDHVKLVNEVTEFAKTCVADESAADCDKSLHTLFGDKLCTVASLRETYGEMADCCEKQEPERNECFLQHKSDNPDLPKLKPEPEALCTAFQENEKRFGGKYLYEIARRHPYFYAPELLYYAHQYKHVFEECCKDADKAACLLPKLDALKERILASSARQRLRCTSIQKFGDRALKAWSVGHLSQKFPKADFAEISKIVTDLTKIHKECCQGDLLECADDRADLAKYFCDNQETISSKLKECCEKPLLEKSHCIHEAERDEMPENLPAITEQFAEDKDVCKHYTEEKDVFLGMFLHEYARRHPEYAVSLLLRIAKEYEATLEDCCAKDDPHACYATVFDK…	5.23077	LVNEVTEFAK-YLYEIAR-RHPYFYAPELLYYAHQYK-HPYFYAPELLYYAHQYK-AWSVGHLSQKFPK-HYTEEKDVFLGMFLHEYAR-DVFLGMFLHEYAR-RHPEYAVSLLLR-HPEYAVSLLLR-LGEYGFQNDILVR-RLPQVSTPTLVEVAR-LPQVSTPTLVEVAR-QTALAELLK-	#
20140707-tam107n	hemoglobin subunit beta [Bos taurus]	gi%7c27819608 gi%7c358420687 gi%7c122572 gi%7c576143 gi%7c576145 gi%7c12084213 gi%7c12084215 gi%7c12084217 gi%7c12084219 gi%7c12084221 gi%7c12084223 gi%7c14488449 gi%7c14488451 gi%7c183448353 gi%7c183448355 gi%7c197724898 gi%7c197724900 gi%7c197724902 gi%7c197724904 gi%7c312597547 gi%7c312597549 gi%7c312597551 gi%7c312597553 gi%7c312597555 gi%7c312597557 gi%7c395 gi%7c162741 gi%7c294459579 gi%7c2…	15944	364	241	7	0.51	MLTAEEKAAVTAFWGKVKVDEVGGEALGRLLVVYPWTQRFFESFGDLSTADAVMNNPKVKAHGKKVLDSFSNGMKHLDDLKGTFAALSELHCDKLHVDPENFKLLGNVLVVVLARNFGKEFTPVLQADFQKVVAGVANALAHRYH	34.4286	AAVTAFWGK-VKVDEVGGEALGR-VDEVGGEALGR-LLVVYPWTQR-FFESFGDLSTADAVMNNPK-LLGNVLVVVLAR-EFTPVLQADFQK-	#
20140707-tam107n	serum albumin precursor [Equus caballus]	gi%7c126723507 gi%7c543794 gi%7c399672	68554	381	38	7	0.1	MKWVTFVSLLFLFSSAYSRGVLRRDTHKSEIAHRFNDLGEKHFKGLVLVAFSQYLQQCPFEDHVKLVNEVTEFAKKCAADESAENCDKSLHTLFGDKLCTVATLRATYGELADCCEKQEPERNECFLTHKDDHPNLPKLKPEPDAQCAAFQEDPDKFLGKYLYEVARRHPYFYGPELLFHAEEYKADFTECCPADDKLACLIPKLDALKERILLSSAKERLKCSSFQNFGERAVKAWSVARLSQKFPKADFAEVSKIVTDLTKVHKECCHGDLLECADDRADLAKYICEHQDSISGKLKACCDKPLLQKSHCIAEVKEDDLPSDLPALAADFAEDKEICKHYKDAKDVFLGTFLYEYSRRHPDYSVSLLLRIAKTYEATLEKCCAEADPPACYRTVFDQ…	5.42857	LVNEVTEFAK-DAKDVFLGTFLYEYSR-DVFLGTFLYEYSR-RHPDYSVSLLLR-KAPQVSTPTLVEIGR-APQVSTPTLVEIGR-TVLGNFSAFVAK-	#
20140707-tam107n	Hemoglobin beta chain [Equus caballus]	gi%7c122614 gi%7c230633 gi%7c1942779 gi%7c12084225 gi%7c24158718 gi%7c38492539 gi%7c38492541 gi%7c60593449 gi%7c73535585 gi%7c73535587 gi%7c73535589 gi%7c73535591 gi%7c73535593 gi%7c73535595 gi%7c93279207 gi%7c192988359 gi%7c192988364 gi%7c192988368 gi%7c192988372 gi%7c192988374 gi%7c192988378 gi%7c192988380	15998	435	250	6	0.43	VQLSGEEKAAVLALWDKVNEEEVGGEALGRLLVVYPWTQRFFDSFGDLSNPGAVMGNPKVKAHGKKVLHSFGEGVHHLDNLKGTFAALSELHCDKLHVDPENFRLLGNVLVVVLARHFGKDFTPELQASYQKVVAGVANALAHKYH	41.6667	AAVLALWDK-AAVLALWDKVNEEEVGGEALGR-VNEEEVGGEALGR-LLVVYPWTQR-FFDSFGDLSNPGAVMGNPK-LLGNVLVVVLAR-	#
20140707-tam107n	alpha-1-antiproteinase 2-like isoform X1 [Equus caballus]	gi%7c194225326 gi%7c545202736	46896	332	65	5	0.11	MPSSVTWCLLLLAGLCCLVPSSLAEDLQGDAVPERHATKDDNEHPQEPAEHKIAPNLADFAFSLYRHVAHQSNTTNIFFSPVSIATAFALLSLGAKGDTHTQILEGLRFNLTELAEAQIHDGFQHLLNALNHSDNQLQLTTGNGLFIDKTLKLVDKFQEDVKNLYHSEAFSINFGDIEEAKKQINDYVENGTQGKIVDLVKDLDKDTVLALVNYIFFKGKWEKPFEPESTTEQDFHVDEKTTVRVPMMHRLSSFDVQYSDTLSSWVLLLDYAGNATAFFILPDQGKLRHLEDTLTKGILATFLENRHSRYANVSLPKLSISGCYDLKRILPELGITKVFSLEADLSGIAEETSLTVSKALHKAVLTIDEKGTEAAGATIVEAIRTLLHTNVEFNRPFVL…	13	IAPNLADFAFSLYR-IVDLVKDLDKDTVLALVNYIFFK-DLDKDTVLALVNYIFFK-DTVLALVNYIFFK-GILATFLENR-	#
20140707-tam107n	alpha-2-macroglobulin precursor [Bos taurus]	gi%7c157954061 gi%7c294862407 gi%7c157743038 gi%7c296487159	167470	234	7	4	0.04	MGKNKLLYPSLTLLLLLLLPTDASVSGKPQYMVLVPSLLHTETPEKGCLLLSHLNETVTVSASLESVRENRSLFTDVVAEKDLFHCVSFTLPRSPTSQEVMFLTIQVKGPTQEFKKRTTVLVKNEESLVFVQTDKPIYKPEQTVKFRIVLLDESFHPLNELVPLVYVEDPKGNRIAQWQNLEVENGLQQLTFPLSSEPFQGSYKVVVQKGSGGTAEHPFTVEEFVLPKFEVQVRMPKIITILEEEVQVSVCGLYTYGKPVPGRVTMNMCRKYRNPSNCYGEESNAVCEKFSGELNNEGCFSQQVNTKIFQLKRQEFEMKIEVEAKIQEEGTEVELTGKGATEITTTITKLSFVTVDSNLRRGIPFTGKVLLVDGKGVPMPNKVIFITANEANHNSNTTT…	1.75	GSGGTAEHPFTVEEFVLPK-VFQPFFVELTMPYSVIR-ASFSVLGDILGSAMR-GYIFIDEAHITEALTWLAQK-	#
20140707-tam107n	prepro complement component C3 [Bos taurus]	gi%7c83764016	187175	194	6	4	0.03	MKPTSGPSLLLLLLASLPMALGNPMYSMITPNILRLESEETVVLEAHGGQGTIQVSVTVHDFPAKKQVLSNENTQLNSNNGYLSTVTIKIPASKELKSDKGHKFVTVVATFGNVQVEKVVLISLQSGYLFIQTDKTIYTPGSTVLYRVFTVDHKLLPVGQTVFITIETPDGIPVKRDSKSSQNQFGILTLSWNIPELVNMGVWKIKAYYEDSPQQVFSAEFEVKEYVLPSFEVQLEPEEKFYYIDDPDGLKVNIIARFLYGEQVDGTAFVIFGVQDGDRRISLTHSLTRVPINDGNGEAILKRQVLLNGVQPSRADALVGKSIYVSATVILQSGSDMVEAERTGIPIVTSPYQIHFTKTPKFFKPAMPFDLMVYVTNPDGSPARHIPVVTQGSNVQSLT…	1.5	SSVAVPYVIVPLK-LYNVEATSYALLALLAR-VSHTVEDCLSFK-KLEDDFDEYIMVIENIIK-	#
20140707-tam107n	alpha-1-antiproteinase precursor [Bos taurus]	gi%7c27806941 gi%7c528999741 gi%7c461442 gi%7c42 gi%7c74268348 gi%7c95769204 gi%7c296475158	46075	233	45	3	0.1	MALSITRGLLLLAALCCLAPISLAGVLQGHAVQETDDTSHQEAACHKIAPNLANFAFSIYHHLAHQSNTSNIFFSPVSIASAFAMLSLGAKGNTHTEILKGLGFNLTELAEAEIHKGFQHLLHTLNQPNHQLQLTTGNGLFINESAKLVDTFLEDVKNLYHSEAFSINFRDAEEAKKKINDYVEKGSHGKIVELVKVLDPNTVFALVNYISFKGKWEKPFEMKHTTERDFHVDEQTTVKVPMMNRLGMFDLHYCDKLASWVLLLDYVGNVTACFILPDLGKLQQLEDKLNNELLAKFLEKKYASSANLHLPKLSISETYDLKSVLGDVGITEVFSDRADLSGITKEQPLKVSKALHKAALTIDEKGTEAVGSTFLEAIPMSLPPDVEFNRPFLCILYDR…	15	LVDTFLEDVK-VLDPNTVFALVNYISFK-SVLGDVGITEVFSDR-	#
20140707-tam107n	hemoglobin subunit alpha-like [Camelus ferus]	gi%7c560905241	15294	153	44	3	0.25	MVLSSKDKTNVKTAFGKIGGHAAEYGAEALERMFLGFPTTKTYFPHFDLSHGSAQVKAHGKKVGDALTKAADHLDDLPSALSALSDLHAHKLRVDPVNFKLLSHCLLVTVAAHHPGDFTPSVHASLDKFLANVSTVLTSKYR	14.6667	IGGHAAEYGAEALER-MFLGFPTTK-FLANVSTVLTSK-	#
20140707-tam107n	IgM heavy chain constant region [Bos taurus]	gi%7c2232299	47885	133	30	3	0.07	EGESHPRVFPLVSCVSSPSDESTVALGCLARDFVPNSVSFSWKFNNSTVNSERFWTFPEVLRDGLWSASSQVVLPSSSAFQGPDDYLVCEVQHPKGGKTVGTVRVIATKAEVLSPVVSVFVPPRNSLSGDGNSKSSLICQATDFSPKQISLSWFRDGKRIVSGISEGQVETVQSSPVTFRAYSMLTITERDWLSQNVYTCQVEHNKETFQKNVSSSCDVAPPSPIGVFTIPPSFADIFLTKSAKLSCLVTNLASYDGLNISWSRQNGKALETHTYFERHLNDTFSARGEASVCSEDWESGEEFTCTVAHSDLPFPKKNSVSKPKDVAMKPPSVYLLPPTREQLSLRESASVTCLVKGFAPADVFVQWLQRGEPVTKSKYVTSSPAPEPQDPSVYFVHSI…	10	FWTFPEVLR-QISLSWFR-GFAPADVFVQWLQR-	#
20140707-tam107n	immunoglobulin gamma 1a heavy chain_ partial [Camelus dromedarius]	gi%7c441414755 gi%7c441414757	24627	169	20	3	0.14	APELPGGPSVFVFPPKPKDVLSISGRPEVTCVVVDVGQEDPEVNFNWYIDGVEVRTANTKPKEEQFNSTYRVVSVLTIQHQDWLTGKEFKCKVNNKALPAPIERTISKAKGQTREPQVYTLAPHREELAKDTVSVTCLVKGFYPADINIEWQRNRQPESEGAYATTLPQLDNDGTYFLYSKLSVGKNTWQRGETFTCVVMHEALHNHYTQKSITQSSGK	6.66667	VVSVLTIQHQDWLTGK-VVSVLTIQHQDWLTGKEFK-GFYPADINIEWQR-	#
20140707-tam107n	Alpha-1-antitrypsin precursor-like protein [Camelus ferus][Vicugna pacos]	gi%7c528761956 gi%7c560971889	52006	141	20	3	0.14	MASSITRGLLLLAGLCCLVPISLAEGLQGHAVQETDAPNQDREHHMEAACHKIAPNLADFAFSVYRQVASGSTTTNIFFSPVSIAIAFAMLSLGAKGDTHTEILNGLDFNLTEITEAEIHEGFQHLLHTLNQPDNQLQLTTGNGLFINETAKLVSKFLEDIKKLYHSEAFSINFMDTEAAKKQINDYVEKGTQGKIVDLVQDLDKDTVFALVNYIFFKVSIATAFAMPSLGAKGDARTEIMKALGYNSKKALNADVHGGVHHLLDISIRQDGKWEKPFDAERTTEEDFHVDAETTVKVPMMSRLGMFDLHYCDTLASWVLLMDYVGNATAFFILPDEGKLQHLEDTLTKEILSKFLEKRYPSSANLRFPKLSISGTYNLQTLLGKLGITKVFSNGADLS…	6.66667	IAPNLADFAFSVYR-QVASGSTTTNIFFSPVSIAIAFAMLSLGAK-IVDLVQDLDKDTVFALVNYIFFK-	#
20140707-tam107n	alpha-1 acid glycoprotein [Bos taurus][Rupicapra rupicapra]	gi%7c307742655 gi%7c94966811 gi%7c121957959 gi%7c74268094	20596	112	26	2	0.11	NLMTAAPITNATMDLLSGKWFYIGSAFRNPEYNKSARAIQAAFFYLEPRHAEDKLITREYQTIEDKCVYNCSFIKIYRQNGTLSKVESDREHFVDLLLSKHFRTFMLAASWNGTKNVGVSFYADKPEVTQEQKKEFLDVIKCIGIQESEIIYTDEKKDACGPLEKQHEEERKKETEAS	13	WFYIGSAFR-AIQAAFFYLEPR-	#
20140707-tam107n	IgG1 heavy chain constant region_ partial [Bos taurus]	gi%7c7547266	35825	80	17	2	0.1	ASTTAPKVYPLSSCCGDKSSSTVTLGCLVSSYMPEPVTVTWNSGALKSGVHTFPAVLQSSGLYSLSSMVTVPGSTSGTQTFTCNVAHPASSTKVDKAVDPRCKTTCDCCPPPELPGGPSVFIFPPKPKDTLTISGTPEVTCVVVDVGHDDPEVKFSWFVDDVEVNTATTKPREEQFNSTYRVVSALRIQHQDWTGGKEFKCKVHNEGLPAPIVRTISRTKGPAREPQVYVLAPPQEELSKSTVSLTCMVTSFYPDYIAVEWQRNGQPESEDKYGTTPPQLDADGSYFLYSRLRVDRNSWQEGDTYTCVVMHEALHNHYTQKSTSKSAGK	8.5	FSWFVDDVEVNTATTKPR-EPQVYVLAPPQEELSK-	#
20140707-tam107n	alpha-1-acid glycoprotein-like [Camelus ferus][Vicugna pacos]	gi%7c560919741 gi%7c528760425 gi%7c560978319	23002	104	11	2	0.12	MALPWALAVLSLLPVLDAQSPACPNVTAPPITNATLDRISGRWYYIGSAFRNPEYNVSARSIQAAFFYFSPNYVEDKIILREYMTIGNQCIYNTSILTVYRENGTISKHEWGREHFADLLFTKDPKTFMLANARTDEQNKGLSFYADKPELTQEQMKEFHEGISCLGIDKSEIMYTDEQKNLCGPLEKQHEEERKKENEGS	5.5	WYYIGSAFR-SIQAAFFYFSPNYVEDK-	#
20140707-tam107n	Chain L_ Crystal Structure Of Bovine Antibody Blv1h12 With Ultralong Cdr H3	gi%7c513137422 gi%7c513137424 gi%7c513137426 gi%7c513137428	22501	138	9	2	0.14	XAVLNQPSSVSGSLGQRVSITCSGSSSNVGNGYVSWYQLIPGSAPRTLIYGDTSRASGVPDRFSGSRSGNTATLTISSLQAEDEADYFCASAEDSSSNAVFGSGTTLTVLGQPKSPPSVTLFPPSTEELNGNKATLVCLISDFYPGSVTVVWKADGSTITRNVETTRASKQSNSKYAASSYLSLTSSDWKSKGSYSCEVTHEGSTVTKTVKPSECS	4.5	PAVLNQPSSVSGSLGQR-YAASSYLSLTSSDWK-	#
20140707-tam107n	immunoglobulin gamma 4 heavy chain constant region [Equus caballus]	gi%7c15027001	36537	96	4	2	0.09	ASTTAPKVFPLASHSAATSGSTVALGCLVSSYFPEPVTVSWNSGALTSGVHTFPSVLQSSGLYSLSSMVTVPASSLKSQTYICNVAHPASSTKVDKKIHLSVLSAVIKECNGGCPAPECLQVGPSVFIFPPKPKDVLMISRTPTVTCVVVDVGHDFPDVQFNWYVDGVETHTATTEPKQEQFNSTYRVVSVLPIQHKDWLSGKEFKCKVNNKALPAPVERTISKPTGQPREPQVYVLAPHRDELXRXNVSVTCLVKDFYPTDIDIEWKSNGQPEPETKYSTTPAQLDSDGSYFLYSKLTVETNRWQQGTTFTCAVMHEALHNHYTEKSVSKSPGK	2	DFYPTDIDIEWK-YSTTPAQLDSDGSYFLYSK-	#
20140707-tam107n	haptoglobin [Equus caballus]	gi%7c149699777	38441	75	2	2	0.07	MSALGAVVALLLWGQLFAVDTGNEATDFTDDSCPKPPEIPNGYVEHLVRYQCKNYYRLRSEGDGVYALNSEKQWVNKASGTKLPECEAVCGKPKNPVDQVQRIIGGLLDAKGSFPWQAKLVSRHNLTTGATLISEQWLLTTAQNLFLNHTPDAKPKDIAPTLKLYVGRKQPVEIEKVVFHPDYQEVDIGLIKLKEKVPVGERVMPICLPSKDYAQVGRVGYVSGWGRNANFNFTELLKYVTLPVADQDTCVKHYEGSTVPEKKTNRSSVGVQPILNEHTFCAGLSKFQEDTCYGDAGSAFVIHDEEDDTWYAAGILSFDKSCAVAEYGVYVKVPSILDWVQKTIAEN	1	VVFHPDYQEVDIGLIK-VPSILDWVQK-	#
	keratins
20140707-tam107n	keratin_ type I cytoskeletal 10-like [Equus caballus]	gi%7c149723838	61580	1215	213	25	0.29	MSVRYSSRKQYSSSRSGGGGGGGSSLRISSSKGSLGGGFSSGGFSGGSFSRGSSGGGCFGGSSGGYGGGSGGGFGGGSFGGGYGSSSLGGGFGGGSFGGGSFGGGSFGGGSFGGGSFVGGGFGGGFGGGFGGDGGLLSGNEKVTMQNLNDRLASYLDKVRALEESNYELEGKIKEWYEKHGNAGQREPRDYSKYYQIIEDLKNQIINLTNDNANVVLQIDNARLAADDFRLKYENELALRQSVEADINGLRRVLDELTLTKADLEMQIESLTEELAYLKKNHEEEMRDLQNVSTGDVNVEMNAAPGVDLTELLNNMRNQYEQLAEQNRKDAEAWFNEKSQELTTEINSNIEQMSSHKSEITELRRTVQGLEIELQSQLALKQSLEASLAETEGRYCVQL…	8.52	ISSSKGSLGGGFSSGGFSGGSFSR-GSLGGGFSSGGFSGGSFSR-VTMQNLNDR-VTMQNLNDRLASYLDK-VTMQNLNDRLASYLDKVR-LASYLDK-LASYLDKVR-ALEESNYELEGK-IKEWYEK-LAADDFR-LKYENELALR-YENELALR-QSVEADINGLR-QSVEADINGLRR-RVLDELTLTK-VLDELTLTK-VLDELTLTKADLEMQIESLTEELAYLKK-ADLEMQIESLTEELAYLK-ADLEMQIESLTEELAYLKK-DAEAWFNEK-SEITELRR-QSLEASLAETEGR-IRLENEIQTYR-LENEIQTYR-SLLEGEGSSGGGGR-	#
20140707-tam107n	keratin_ type I cytoskeletal 14 [Bos taurus]	gi%7c262118301	51849	1118	173	25	0.42	MTTCSRQYTSSSSIKSSGGIGGGSSRISSVLAGGSCRAPSAYGGLSVSSSRYSSGGVCGLGGGYGGGFSSSSSFGGALGSGFGGGYGGGLGAGFGGGFGGGVGGGFGGGFGVGDGLLAGSEKVTMQNLNDRLASYLDKVRALEEANADLEVKIRDWYQRQRPAEIKDYSPYFKTIEDLRNKILTATVDNANVVLQIDNARLAADDFRTKYETELNLRLSVEADINGLRRVLDELTLARADLEMQIESLKEELAYLRKNHEEEMNSLRGQVGGDVNVEMDAAPGVDLSRILNEMRDQYEKMAEKNRKDAEDWFFSKTEELNREVATNSELVQSGKSEISELRRTLQNLEIELQSQLSMKASLENSLEETKGRYCMQLAQIQELISSVEEQLAQLRCEMEQ…	6.92	APSAYGGLSVSSSR-VTMQNLNDR-VTMQNLNDRLASYLDK-VTMQNLNDRLASYLDKVR-LASYLDK-LASYLDKVR-ALEEANADLEVK-DYSPYFK-LAADDFR-TKYETELNLR-YETELNLR-LSVEADINGLR-LSVEADINGLRR-VLDELTLAR-ADLEMQIESLKEELAYLR-GQVGGDVNVEMDAAPGVDLSR-ILNEMR-DAEDWFFSK-EVATNSELVQSGK-ASLENSLEETK-ASLENSLEETKGR-TRLEQEIATYR-TRLEQEIATYRR-LEQEIATYR-LLEGEDAHLSSSQFSSGSQSSR-	#
20140707-tam107n	keratin_ type I cytoskeletal 14 [Camelus ferus]	gi%7c560904808 gi%7c528765789	51371	1078	166	25	0.4	MTTCSRQFTSSGSMKGIGGGSSRISSVLAGGSCRAPSAYGGLSVTTSRYSSGGACGLGGGYGGGFSSSSSFGGALGGGFGGGYGAGLGGGLGGGFGGGFGGGFGGGDGLLVGSEKVTMQNLNDRLASYLDKVRALEEANADLEVKIRDWYQRQRPAETKDYSPYFKTIEDLRNKILTATVDNANIVLQIDNARLAADDFRTKYETELNLRMSVEADINGLRRVLDELTLARADLEMQIESLKEELAYLRKNHEEEMNALRGQVGGDVNVEMDAAPGIDLSRILNEMRDQYEKIAEKNRKDAEDWFFSRTEELNREVATNSELVQSGKTEISELRRTVQNLEIELQSQLSMKASLENSLEETKGRYCMQLAQIQELISSVEEQLAQLRCEMEQQNQEYKI…	6.64	APSAYGGLSVTTSR-VTMQNLNDR-VTMQNLNDRLASYLDK-VTMQNLNDRLASYLDKVR-LASYLDK-LASYLDKVR-ALEEANADLEVK-DYSPYFK-LAADDFR-TKYETELNLR-YETELNLR-MSVEADINGLR-MSVEADINGLRR-VLDELTLAR-ADLEMQIESLKEELAYLR-NHEEEMNALR-ILNEMR-DAEDWFFSR-EVATNSELVQSGK-ASLENSLEETK-ASLENSLEETKGR-TRLEQEIATYR-TRLEQEIATYRR-LEQEIATYR-LLEGEDAHLSSSQFSSGSQSSR-	#
20140707-tam107n	keratin_ type II cytoskeletal 5 isoformX1 [Equus caballus]	gi%7c149714762	62397	1176	129	25	0.4	MSRQSSVSFRSGGSRGFSAASAITPSVSRTSFTSVSRSGGGGGGFGRVSLGGAGGAGGYGSRSLYNLGGSKRISISTSGGGFRNRFGAVAGGGYGFGGGAGSGFGFGSGAGGGFGLGGGAGFGGGFGGPGFPVCPPGGIQEVTVNQSLLTPLNLQIDPTIQRVRTEEREQIKTLNNKFASFIDKVRFLEQQNKVLDTKWTLLQEQGTRTVRQNLEPLFEQYINNLRRQLDGILGERGRLDSELRNMQDLVEDFKNKYEDEINKRTTAENEFVMLKKDVDAAYMNKVELEAKVDALMDEINFMKMFFEAELSQMQTHVSDTSVVLSMDNNRSLDLDSIIAEVKAQYEEIANRSRTEAESWYQTKYEELQQTAGRHGDDLRNTKHEISEMNRMIQRLRAEI…	5.16	GFSAASAITPSVSR-TSFTSVSR-SLYNLGGSK-ISISTSGGGFR-TLNNKFASFIDK-FASFIDK-WTLLQEQGTR-QNLEPLFEQYINNLR-QLDGILGER-NMQDLVEDFK-NKYEDEINK-NKYEDEINKR-TTAENEFVMLK-DVDAAYMNK-VDALMDEINFMK-SLDLDSIIAEVK-AQYEEIANR-TEAESWYQTKYEELQQTAGR-YEELQQTAGR-LRAEIDNVKK-LAELEDALQK-EYQELMNTK-LALDVEIATYR-LALDVEIATYRK-SLGVGFGSGGGSGSSVK-	#
20140707-tam107n	keratin_ type II cytoskeletal 5 [Camelus ferus]	gi%7c560912494	61665	1041	124	24	0.37	MSRQSSVSFRSGGSRSFSTASAITPSISRTSFTTVSRSGGGGGGGFGRVSLGGACGAGGFGSRSLYNLGSSKRISFSAGGGGFRSRFGAGAGGGYGFGGGAGSGFGFGGGAGGGFGLGGGAGFGGGFGGPGFPVCPPGGIQEVTVNQSLLTPLNLQIDPAIQRVRTEEREQIKTLNNKFASFIDKVRFLEQQNKVLDTKWTLLQEQGTKTVRQNLEPLFEQYINNLRRQLDGILGERGRLDSELRNMQDLVEDFKNKYEDEINKRTTAENEFVMLKKDVDAAYMNKVELEAKVDALMDEINFMKMFFDAELSQMQTHVSDTSVVLSMDNNRSLDLDSIIAEVKAQYEEIANRSRTEAESWYQTKYEELQQTAGRHGDDLRNTKHEISEMNRMIQRLRAE…	5.16667	SFSTASAITPSISR-TSFTTVSR-ISFSAGGGGFR-TLNNKFASFIDK-FASFIDK-VLDTKWTLLQEQGTK-WTLLQEQGTK-QNLEPLFEQYINNLR-QLDGILGER-NMQDLVEDFK-NKYEDEINK-NKYEDEINKR-TTAENEFVMLK-DVDAAYMNK-VDALMDEINFMK-SLDLDSIIAEVK-AQYEEIANR-TEAESWYQTKYEELQQTAGR-YEELQQTAGR-LRAEIDNVKK-LAELEDALQK-EYQELMNTK-LALDVEIATYR-LALDVEIATYRK-	#
20140707-tam107n	keratin_ type I cytoskeletal 10 [Ovis aries][Capra hircus][Pantholops hodgsonii]	gi%7c426239020 gi%7c548508966 gi%7c556738574	59178	963	122	20	0.28	MSVRYSSSKQYSSSRSGHGGGGGSSLRISSSKGSLGGGFSSGGFSGGSFSRGSSAGGCLGGSSIVYGGGLGGGFGGGYGSNFGGSYGGGSFGGGYGGGSFGGGSFGGGSFGGGLGGGFGGDGGLISGNEKITMQNLNDRLASYLDKVRALEESNYELEVKIKEWYEKHGNSSQREPRDYSKYYQTIEDLKNQILNLTTDNANILIQVDNARLAADDFRMKYENEVTLRQSVEADINGLRRVLDELTLTKTDLEMQIESLTEELAYLKKNHEEEMRDLQNVSTGDVNVEMNAAPGVDLTELLNNMRSQYEQLAEKNRRDAEAWFNEKSKELTTEINSNLEQVSSHKSEITELRRTIQGLEIELQSQLALKQSLEASLAETEGRYCVQLSQIQSQISALEE…	6.1	ISSSKGSLGGGFSSGGFSGGSFSR-GSLGGGFSSGGFSGGSFSR-ITMQNLNDR-LASYLDK-LASYLDKVR-ALEESNYELEVK-IKEWYEK-LAADDFR-MKYENEVTLR-YENEVTLR-QSVEADINGLR-QSVEADINGLRR-RVLDELTLTK-VLDELTLTK-TDLEMQIESLTEELAYLK-DAEAWFNEK-SEITELRR-QSLEASLAETEGR-IRLENEIQTYR-LENEIQTYR-	#
20140707-tam107n	keratin_ type II cytoskeletal 1 [Bos taurus]	gi%7c297474460 gi%7c296487880	63113	620	126	13	0.19	MSRHFSSRSGYRCGGGGGGFSSGSAGVVSYQRRSTSSSVRRSGGGGGRFSGGVCGGGAGGGFGSRSLINLGGSKSISISVAGGGGRGGFGGGYGGGYGGGGFGGGGFGGGGFGAGGFGVGGIGGGFGGGGFGGGGFGGGGFPVCPGGIQEVTINQSLLQPLNVEIDPEIQKIKSREREQIKSLNNQFASFIDKVRFLEQQNQVLQTKWELLQQINTSTRTYSLEPLFEAYISRLRRTVDQLKSDQSRLDSELKNMQDLVEDYRRKYEDEINKRTNAENEFVGIKNDVDAAYITKVDLQAKFDNLLQEIDFYKTLYQAELSQMQTHISDTNVILSMDNNRNLDLNSIIDEVKAQYEEIAQRSKAEAEALYQTKYEELQITAGQHGDSLKNTKVEISELNR…	9.69231	SLNNQFASFIDK-SLNNQFASFIDKVR-FLEQQNQVLQTK-TYSLEPLFEAYISR-NMQDLVEDYR-KYEDEINKR-FDNLLQEIDFYK-AQYEEIAQR-LLRDYQELMNTK-DYQELMNTK-LALDVEIATYR-TLLEGEESR-FVSTSYSR-	#
20140707-tam107n	keratin_ type II cytoskeletal 1 isoform X1 [Equus caballus]	gi%7c338726100	64748	554	87	10	0.16	MSRNFSSRSGRRIGGGFSSGSAGVVSFQRRTTSSSVCRGGGGGGGFSGGRYGAGCAGGGFGSRSLVNLGGNKSISISVARGGGRSGFGGGYGGGGFGVGGYGGGGFGGGGFGSGGFGGGGFGSGGFGGGFGSGGFGGGFGSGGGFGGGGFRGGFGPVCPPGGIQEVTINQSLLQPLNVEIDPEIQRVKSQEREQIKTLNNQFASFIDKVRFLEQQNQVLQTKWELLQQVDTPTRTQSLEPIFEAYISSLRRQVDQLKSDQSRMDSELKNMQDVVEDYRNKYEEEINKRTNAENEFVTIKKDVDAAYITKVDLQAKVDNLRQEIEFLRILYQEELSQLQTHISDTNVILSMDNNRHLDLDSIIAEVRAQYEDIAQKSKAEAEALYQSKYEELQITAGSHG…	8.7	IGGGFSSGSAGVVSFQR-SISISVAR-FLEQQNQVLQTK-TQSLEPIFEAYISSLR-NKYEEEINKR-TNAENEFVTIK-TNAENEFVTIKK-AQYEDIAQK-LALDVEIATYR-TLLEGEESR-	#
20140707-tam107n	keratin_ type II cytoskeletal 5 isoform X1 [Pantholops hodgsonii]	gi%7c556726058	62535	1252	136	27	0.41	MSRQSTLSFRSGGSRSFSTASAITPSVSRTSFTSVSRSGGGGGAGFGRVSLGGAYGAGGFGSRSLYNLGGSKRISISASGGGFRNRFGAGAGGGYGFGGGAGSGFGFGGGAGGGGFGLGGVAGFGGGFGGPGFPVCPPGGIQEVTVNQSLLTPLNLQIDPTIQRVRTEEREQIKTLNNKFASFIDKVRFLEQQNKVLDTKWTLLQEQGTKTVRQNLEPLFEQYINNLRRQLDGILGERSRLDSELRNMQDLVEDFKNKYEDEINKRTTAENEFVMLKKDVDAAYMNKVELEAKVDALMDEINFMKMFFDAELSQMQTHVSDTSVVLSMDNNRSLDLDSIIAEVKAQYEDIANRSRTEAESWYQTKYEELQQTAGRHGDDLRNTKHEISEMNRMIQRLRS…	5.03704	SFSTASAITPSVSR-TSFTSVSR-VSLGGAYGAGGFGSR-SLYNLGGSK-ISISASGGGFR-TLNNKFASFIDK-FASFIDK-VLDTKWTLLQEQGTK-WTLLQEQGTK-QNLEPLFEQYINNLR-QLDGILGER-NMQDLVEDFK-NKYEDEINK-NKYEDEINKR-TTAENEFVMLK-DVDAAYMNK-VDALMDEINFMK-SLDLDSIIAEVK-TEAESWYQTKYEELQQTAGR-YEELQQTAGR-LRSEIDNVK-LRSEIDNVKK-LAELEDALQK-EYQELMNTK-LALDVEIATYR-LALDVEIATYRK-SLGFGSGGGSSSSVK-	#
	muscle-associated
20140707-tam107n	tropomyosin beta chain [Bos taurus][Sus scrofa][Pan troglodytes][Homo sapiens] [Heterocephalus glaber][Cavia porcellus][Oreochromis niloticus][Canis lupus familiaris]	gi%7c194018702 gi%7c83778524 gi%7c348503984 gi%7c348570240 gi%7c507647549 gi%7c351707041 gi%7c42476296 gi%7c114624388 gi%7c395740311 gi%7c397519479 gi%7c402897020 gi%7c403306668 gi%7c530390121 gi%7c544493587 gi%7c635072744 gi%7c136090 gi%7c37249 gi%7c55633165 gi%7c395740315 gi%7c530390125 gi%7c544493589 gi%7c635072742 gi%7c73971272 gi%7c149739249 gi%7c301767016 gi%7c426220242 gi%7c471363582 gi%7c…	33326	240	18	7	0.14	MDAIKKKMQMLKLDKENAIDRAEQAEADKKQAEDRCKQLEEEQQALQKKLKGTEDEVEKYSESVKDAQEKLEQAEKKATDAEADVASLNRRIQLVEEELDRAQERLATALQKLEEAEKAADESERGLKVIENRAMKDEEKMELQEMQEMQLKEAKHIAEDSDRKYEEVARKLVILEGELERSEERAEVAESRARQLEEELRTMDQALKSLMASEEEYSTKEDKYEEEIKLLEEKLKEAETRAEFAERSVAKLEKTIDDLEETLASAKEENVEIHQTLDQTLLELNNL	2.57143	RIQLVEEELDRAQER-IQLVEEELDR-IQLVEEELDRAQER-LATALQKLEEAEK-KLVILEGELER-KLVILEGELERSEER-LVILEGELER-	#
20140707-tam107n	actin	gi%7c297343122	40019	237	16	6	0.19	DEDETTALVCDNGSGLVKAGFAGDDAPRAVFPSIVGRVGDEAQSKRGILTLKYPIEHGIITNWDDMEKIWHHTFYNELRVAPEEHPTLLTEAPLNPKANREKMTQIMFETFNVPAMYVAIQAVLSLYASGRTTGIVLDSGDGVTHNVPIYEGYALPHAIMRLDLAGRDLTDYLMKILTERGYSFVTTAEREIVRDIKEKLCYVALDFENEMATAASSSSLEKSYELPDGQVITIGNERFRCPETLFQPSFIGMESAGIHETTYNSIMKCDIDIRKDLYANNVMSGGTTMYPGIADRMQKEITALAPSTMKIKIIAPPERKYSVWIGGSILASLSTFQQMWITKQEYDEAGPSIVHRKCF	2.66667	AGFAGDDAPR-AVFPSIVGR-IWHHTFYNELR-VAPEEHPTLLTEAPLNPK-GYSFVTTAER-EITALAPSTMK-	#
20140707-tam107n	myosin-3 [Gallus gallus]	gi%7c45383668 gi%7c9800486	223074	229	16	5	0.03	MASPDAEMAAFGEAAPYLRKSEKERIEAQNRPFNAKSSVFVVHPKESFVKGTIQSKETGKVTVKTEGGETLTVKEDQIFSMNPPKYDKIEDMAMMTHLHEPAVLYNLKERYAAWMIYTYSGLFCVTVNPYKWLPVYNPEVVLAYRGKKRQEAPPHIFSISDNAYQFMLTDRENQSILITGESGAGKTVNTKRVIQYFATIAASGEKKKEEQPGKMQGTLEDQIISANPLLEAFGNAKTVRNDNSSRFGKFIRIHFGATGKLASADIETYLLEKSRVTFQLKAERSYHIFYQIMSNKKPELIGMLLITTNPYDYHFVSQGEITVPSINDQEELMATDSAIDILGFTADEKVAIYKLTGAVMHYGNLKFKQKQREEQAEPDGTEVADKAAYLMGLNSADLL…	3.2	LASADIETYLLEK-GFLMRVESQRMVER-DIDDLELTLAK-IEELEEEIEAER-DLEEATLQHEATAAALR-	#
20140707-tam107n	desmin [Bos taurus][Sus scrofa][Physeter catodon]	gi%7c2959452 gi%7c2959454 gi%7c593768034	52530	197	9	5	0.13	RVSSYRRTFGGAPSFPLGSPLSSPVFPRAGFGTKGSSSSVTSRVYQVSRTSGGAGGLGALRASRLGSTRVPSSYGAGELLDFSLADAVNQEFLTTRTNEKVELQELNDRFANYIEKVRFLEQQNAALAAEVNRLKGREPTRVAEIYEEELRELRRQVEVLTNQRARVDVERDNLLDDLQRLKAKLQEEIQLKEEAENNLAAFRADVDAATLARIDLERRIESLNEEIAFLKKVHEEEIRELQAQLQEQQVQVEMDMSKPDLTAALRDIRAQYETIAAKNISEAEEWYKSKVSDLTQAANKNNDALRQAKQEMMEYRHQIQSYTCEIDALKGTNDSLMRQMRELEDRFASEASGYQDNIARLEEEIRHLKDEMARHLREYQDLLNVKMALDVEIATYRKL…	1.8	TFGGAPSFPLGSPLSSPVFPR-VAEIYEEELR-ADVDAATLAR-IESLNEEIAFLKK-EYQDLLNVK-	#
20140707-tam107n	troponin C [Bos taurus][Vicugna pacos][Oryctolagus cuniculus][Cricetulus griseus][Otolemur garnettii][Sorex araneus][Erinaceus europaeus]	gi%7c223036 gi%7c110293373 gi%7c223032 gi%7c229450 gi%7c344242208 gi%7c431894444 gi%7c395829099 gi%7c505850748 gi%7c617647032	16696	222	32	4	0.31	ADQLTEEQIAEFKEAFSLFDKDGBGTITTKELGTVMRSLGQNPTEAELQDMINEVDADGNGTIDFPEFLTMMARKMKDTDSEEEIREAFRVFDKDGBGYISAAELRHVMTNLGEKLTDEEVDEMIREANIDGDGEVNYEEFVQMMTAK	8	ADQLTEEQIAEFK-EAFSLFDKDGDGTITTK-VFDKDGNGYISAAELR-VFDKDGDGYISAAELR-	#
	other
20140707-tam107n	protein S100-A7 [Bos taurus]	gi%7c27807077 gi%7c528942108 gi%7c2493414 gi%7c886209 gi%7c1729421 gi%7c148743998 gi%7c296489643	11537	162	13	3	0.41	MSSSQLEQAITDLINLFHKYSGSDDTIEKEDLLRLMKDNFPNFLGACEKRGRDYLSNIFEKQDKNKDRKIDFSEFLSLLADIATDYHNHSHGAQLCSGGNQ	4.33333	SSSQLEQAITDLINLFHK-YSGSDDTIEKEDLLR-DYLSNIFEK-	#
20140707-tam107n	calmodulin-like 5 [Bos taurus]	gi%7c148234364 gi%7c555978155 gi%7c134024697 gi%7c296481360 gi%7c440901750	16714	173	7	3	0.22	MAEKLSEEQVAEFKEAFDRFDKNKDGTISVQELGTVMQEVGLKLSEAELKKLISQLDTDKNGSISFQEFLEAMAAGLQTSDTEGLREIFRAFDQDDDGYISVDELRQATSQLGEKVSQDELDAMIREADVDQDGRVNYEEFVRILTQN	2.33333	LSEEQVAEFK-AFDQDDDGYISVDELR-VNYEEFVR-	#
20140707-tam107n	protein S100-A7 [Equus caballus]	gi%7c126352514 gi%7c122142507 gi%7c110224792	11325	111	8	2	0.37	MSETEAEASVIGIIELFHKYTGRDDMIDKPGLLKMLQDNFPNFLAACDKKGTDYLANVFEKKDKNRDKKIDFSEFLSLLGDIATDYHKQSHGAPACSEGDQ	4	SETEAEASVIGIIELFHK-KIDFSEFLSLLGDIATDYHK-	#
20140707-tam107n	annexin A2 [Vicugna pacos][Capra hircus][Camelus ferus][Equus caballus][Bos taurus][Oryctolagus cuniculus][Ailuropoda melanoleuca][Homo sapiens][Canis lupus familiaris][Chinchilla lanigera][Sus scrofa][Pteropus alecto]	gi%7c183227696 gi%7c90657526 gi%7c291402909 gi%7c301775176 gi%7c27807289 gi%7c147899370 gi%7c555984027 gi%7c556718837 gi%7c113948 gi%7c148876772 gi%7c162779 gi%7c59858385 gi%7c86279630 gi%7c296483199 gi%7c404428590 gi%7c348555457 gi%7c4757756 gi%7c50845386 gi%7c197098468 gi%7c209862831 gi%7c297296560 gi%7c297296562 gi%7c297296564 gi%7c297296566 gi%7c297296568 gi%7c332235824 gi%7c332843941 gi%7c33…	38619	125	6	2	0.08	MSTVHEILCKLSLEGDHSTPASAYGSVKAYTNFDAERDALNIETAIKTKGVDEVTIVNILTNRSNEQRQDIAFAYQRRTKKELAAALKSALSGHLETVILGLLKTPAQYDASELKASMKGLGTDEDSLIEIIYSRTNQELLEINRVYKEMYKTDLEKDIVSDTSGDFRKLMVALAKGRRAEDGSVIDYELIDQDARDLYDAGVKRKGTDVPKWISIMTERSVCHLQKVFERYKSYSPYDMLESIKKEVKGDLENAFLNLVQCIQNKPLYFADRLYDSMKGKGTRDKVLIRIMVSRSEVDMLKIRSEFKRKYGKSLYYYIQQDTKGDYQKALLYLCGGDD	3	GVDEVTIVNILTNR-SALSGHLETVILGLLK-	#
20140707-tam107n	dermatopontin precursor [Pantholops hodgsonii][Camelus ferus] [Ovis aries][Bos taurus][Monodelphis domestica][Oryctolagus cuniculus][Homo sapiens][Otolemur garnettii][Saimiri boliviensis boliviensis] [Mus musculus]	gi%7c114052480 gi%7c109940073 gi%7c88758644 gi%7c296479232 gi%7c126306208 gi%7c291397462 gi%7c311614 gi%7c395825082 gi%7c403272619 gi%7c426239625 gi%7c548498132 gi%7c528754183 gi%7c556747103 gi%7c560936456 gi%7c560977755 gi%7c9789943 gi%7c14916545 gi%7c5852821 gi%7c28204883 gi%7c148707298	23996	93	4	2	0.09	MDLTLLWVLLPLVTVAWGQYGDYGYSYHQYHDYSDDGWVNLNRQGFSYQCPHGQVVVAVRSIFNKKEGSDRQWNYACMPTPQSLGEPTECWWEEINRAGMEWYQTCSNNGLVAGFQSRYFESVLDREWQFYCCRYSKRCPYSCWLTTEYPGHYGEEMDMISYNYDYYMRGATTTFSAVERDRQWKFIMCRMTDYDCEFANV	2	YFESVLDR-GATTTFSAVER-	#
20140707-tam107n	latherin precursor [Equus caballus][Equus hemionus onager][Equus asinus]	gi%7c126722737 gi%7c152031631 gi%7c126514234 gi%7c58531902 gi%7c58531904	24685	98	6	2	0.1	MLKVSCLFVLLCGLLVPSSAQQIPPEVSSQITDALTQGLLDGNFLSLLNAINLEGLLNTILDQVTGLLNILVGPLLGPSDAEIKLQDTRLLQLSLEFSPDSKGIDIWIPLELSVYLKLLILEPLTLYVRTDIRVQLRLESDEDGKYRLAFGHCSLLPRAIELQSGNPLSLPVNAVLGTIENALGNFITEDLGAGLCPTLNSLVSNLDLQLVNNLINLILDRANVDLSV	3	LLQLSLEFSPDSK-LLILEPLTLYVR-	#
20140707-tam107n	sushi repeat-containing protein SRPX [Ovis aries][Capra hircus][Pantholops hodgsonii][Bos taurus]	gi%7c426258033 gi%7c548531646 gi%7c556716830 gi%7c94966791 gi%7c81674400	51298	178	8	4	0.11	MGDLPRAEFPYANPKPASQVQVAFAGALVHRSGDSPLEDDEVVYSDAKYKDIPWCSPIKVKYGDVYCRAPQGGYYQTTLGTRCDIRCQKGYELQGSPQVICQSNKRWSDKVICKQKRCPTLAMPVNGGFKCIDGAYFNSQCEYYCSPGYTLKGEQTVRCMDNKAWSGQPATCVDLEPPRIKCPSVKERVAEPNKLTVRVSWETPEGRDTADGILTDVILKGPPPGSHFPEGDHKIQYTVYDRAENKGTCQFRVKVRVRRCGKLHAPENGYMKCSSDGDNYGAVCEFSCIGGYELQGSSARVCQSNLAWSGTEPSCTAMNVNVGVRTAAALLDQFYEKRRLFIVSTPTARNLLYRLQLGMLQQAQCGLDLRHITVVELVGVFPTLIGRIGAKVMPPALAL…	2	HITVVELVGVFPTLIGR-IPLYSFSIVVLDK-YVSLVTPVALFNLIDTFPLR-YVSLVTPVALFNLIDTFPLRK-	#
20140707-tam107n	major allergen Equ c 1-like [Equus caballus]	gi%7c149738827	21401	132	23	2	0.11	MKLLLLCLGLILVCAQQEENSDVAIRNFDISKISGEWYSIFLASDVKEKIEENGSMRVFVDLIRALDNSSLYAEYQTKVNGECTEFSVVADKTEEDGVYSVKYDGYNVLRISEFGNNEHMILYLVNFDKDRPFQLLEFYAREPDVSPEIKEEFVKIVQKQGIVKENIIDLTQTDRCFQLRGNGVGQA	11.5	ISGEWYSIFLASDVK-VFVDLIR-	#
20140707-tam107n	heat shock protein beta-1 [Bos taurus][Bos mutus][Equus caballus][Capra hircus][Cavia porcellus][Felis catus][Tupaia chinensis][Jaculus jaculus][Sus scrofa][Canis lupus familiaris][Mustela putorius furo][Chinchilla lanigera]	gi%7c149755998 gi%7c348568744 gi%7c389620461 gi%7c410984546 gi%7c440908439 gi%7c444715574 gi%7c507565341 gi%7c50916342 gi%7c50979116 gi%7c1170366 gi%7c624685 gi%7c511883659 gi%7c533205444 gi%7c61553385	23104	96	3	2	0.12	MTERRVPFSLLRSPSWDPFRDWYPAQSRLFDQAFGLPRMPEEWAEWFRHGGWPGYVRSLPGVAIEGPAAVAVPGPAYSRALSRQLSSGVSEIRQTADRWRVSLDVNHFAPEELTVKTKDGVVEITGKHEERQDEHGYISRCFTRKYSLPPGVDPTLVSSSLSPEGTLTIEAPMPKSATQSAEITIPVTFEARAQLGGPEAGKSEQPGAK	1.5	LFDQAFGLPR-VSLDVNHFAPEELTVK-	#
20140707-tam107n	serpin A3-1 precursor [Bos taurus]	gi%7c31340900 gi%7c28077107	46175	360	28	7	0.23	MRAERTSFLLALGLLVAGIPSVHCLPENVVVKDQHRRVDGHTLASSNTDFAFSLYKQLPLKNPNKNVILSPLSVSIALAFLSLGARGSTLTEILEGLKFNLTEIQEKEIHHSFQHLLQALNQPSNQLQLSVGNAMFVQEELKLLDKFIEDAQVLYSSEAFPTNFRDSEAARSLINDYVKNKTQGKIEELFKYLSPRTELVLVNYIYFKAQWKTPFDPKHTEQAEFHVSDNKTVEVPMMTLDLETPYFRDEELGCTLVELTYTSNDSALFILPDEGKMRDLEAKLTPETLTRWRNSLQPRRIHELYLPKFSIKSNYELNDILSQLGIRKIFANADLSGITGTADLVVSQVVHGAALDVDEEGTEGAAATGISMERTILRIIVRVNRPFLIAIVLKDTQSI…	4	NVILSPLSVSIALAFLSLGAR-GSTLTEILEGLK-LLDKFIEDAQVLYSSEAFPTNFR-FIEDAQVLYSSEAFPTNFR-TVEVPMMTLDLETPYFR-SNYELNDILSQLGIR-DTQSIIFLGK-	#
20140707-tam107n	serpin A3-5 isoform X2 [Bos taurus]	gi%7c528922995 gi%7c529000151 gi%7c296475228	46315	371	59	6	0.3	MRAERTSFLLALGLLMAGIRSVHCLPENVVVKDQRRRVDSHTLASSNTDFAFSLYKQLALKNPNKNVMFSPLSVSMALAFLSLGARGPTLTEILEGLKFNLTEIQETQIHQGFQHLLQALNRPSNQLQLSVGNAMFVQEELKLLDKFIEDARVLYSSEAFPTNFGDPEAAKSLINDYVKKKTQGKIEELFKDLSPRTVLVLVNYIYFKAQWKTRFDPKHTEQAEFHVSKNKTVEVPMMTLDLETPYFRDKELGCMLVELTYSSNDSALFILPDEGKMQDLEAKLTPETLTRWRNSLQPRRIHELYLPKFSIKSNYELNDTLSQMGIKKIFTDADLSGITGTADLVVSQVVHGTALDVDEEGTEGAAATGIGIEKLSFQKTTVRFDRPFLIAIALKDTQS…	9.83333	NVMFSPLSVSMALAFLSLGAR-GPTLTEILEGLK-VLYSSEAFPTNFGDPEAAK-TVEVPMMTLDLETPYFR-IFTDADLSGITGTADLVVSQVVHGTALDVDEEGTEGAAATGIGIEK-DTQSIIFLGK-	#
20140707-tam107n	serpin A3-8-like [Camelus ferus]	gi%7c560915951	47079	344	31	5	0.16	MRAEGMSPLLALGLLVAGLCSRVHCLPEGVLDLEKVTQEDQHREASVDNFTLASSNTNFAFSLYKQLALKTPDKNVIFSPLSVSMALAFLSLGARGTTLTEILEGLKFNLTETPESEIHQGFQHLLQTLGQPSNQLQLSVGNAMFVQEQLKLLDKFRDDARALYAAEVSSINFRDPDTAKSLINDYVKNKTQGKVVDLFKRLDPLTEVVLVNYIYFKAKWKLPFDPQVTNQAEFHVSENRSVEVPMMRIPSLVTPMFRDAVLGCVVVELQYTSNDSALFILPDEGRLEEVEAKLLPETLRRWRDSLHPSLIDELGLPKFSISSDYDLKDILPQLGIREVFTDKADLSGVNDSNDLKVTQVVHGAALDVDEEGTKATATTGISMESKSMNMIPVHFNRPF…	6.2	NVIFSPLSVSMALAFLSLGAR-GTTLTEILEGLK-LDPLTEVVLVNYIYFK-IPSLVTPMFR-DTQSIIFLGK-	#
	Bacteria
20140707-tam107n	elongation factor Tu [Macrococcus caseolyticus JCSC5402]	gi%7c222152104 gi%7c506392641 gi%7c254765589 gi%7c222121233	43359	224	8	4	0.15	MAKEKFDRSKTHANIGTIGHVDHGKTTLTAAIATVLSKKLGGEARSYDQIDNAPEEKERGITINTSHIEYETEKRHYAHVDCPGHADYVKNMITGAAQMDGGILVVSAADGPMPQTREHILLSRNVGVPALVVFLNKVDMVDDEELLELVEMEVRDLLSEYDFPGDDVPVIAGSALKALEGVEEYEDKIMELMDAVDEYIPTPERDSDKPFMMPVEDVFSITGRGTVATGRVERGQVKVGEEVEIIGLTEEPSKTTVTGVEMFRKLLDYAEAGDNIGALLRGVSREDVQRGQVLAKPGSITPHTKFKAEVYVLSKEEGGRHTPFFTNYRPQFYFRTTDVTGVVNLPEGTEMVMPGDNIEMNVELISPIAIEDGTRFSIREGGRTVGSGVVSVIEK	2	TTLTAAIATVLSK-NVGVPALVVFLNK-VDMVDDEELLELVEMEVR-LLDYAEAGDNIGALLR-	#
20140707-tam107n	glyceraldehyde-3-phosphate dehydrogenase [Macrococcus caseolyticus JCSC5402]	gi%7c222150771 gi%7c501848074 gi%7c222119893	36445	160	7	3	0.18	MAVKVAINGFGRIGRLAFRRLQEVEGIEVVAVNDLTDDKMLAHLLKYDTTQGRFKEEVEVIEGGFRVNGREVKSFENPNPAELPWGELGIDVVLECTGFFTDKEKAQAHIEAGAKKVLISAPAKGDLKTVVYNVNHDVLDGSEEIVSGASCTTNCLAPMAKVLNDEFGIIEGLMMTVHAFTGDQNTLDAPHAKGDFRRARAAANNIVPNSTGAAKAIGLVIPELKGKLDGSAQRVPVPTGSVTELTTILEKEVSVEEVNAAMKAASNESFGYTEDEIVSSDIIGITYGSLFDATQTRVMTVGEHQMVKTVAWYDNEMSYTAQLVRTLEFLAEQAQAK	2.33333	AIGLVIPELK-VPVPTGSVTELTTILEK-AASNESFGYTEDEIVSSDIIGITYGSLFDATQTR-	#
	Sample 1#, wick region
	10.2mg
	Animal proteins
20140224-517	collagen alpha-1(I) chain [Ovis aries][Capra hircus][Pantholops hodgsonii]	gi%7c426237753 gi%7c548508722 gi%7c556738267	139714	237	27	5	0.04	MFSFVDLRLLLLLAATALLTHGQEEGQEEGQEEDIPPVTCVQNGLRYHDRDVWKPVPCQICVCDNGNVLCDDVICDELKDCPNAKVPTPTYECGPVCPEGRGIARGGGGGGGGPSHSPPQGPAGPPGRDGIPGQPGLPGPPGPPGPPGPPGLGGNFAPQLSYGYDEKSTGISVPGPMGPSGPRGLPGPPGAPGPQGFQGPPGEPGEPGASGPMGPRGPPGPPGKNGDDGEAGKPGRPGERGPPGPQGARGLPGTAGLPGMKGHRGFSGLDGAKGDAGPAGPKGEPGSPGENGAPGQMGPRGLPGERGRPGAPGPAGARGNDGATGAAGPPGPTGPAGPPGFPGAVGAKGEAGPQGPRGSEGPQGVRGEPGPPGPAGAAGPAGNPGADGQPGAKGANGAP…	5.4	GFPGSDGVAGPK-GQAGVMGFPGPK-GETGPSGPAGPTGAR-SGDRGETGPAGPAGPIGPVGAR-GETGPAGPAGPIGPVGAR-	#
20140224-517	collagen alpha-1 type I chain [Equus asinus]	gi%7c221665286	138912	212	19	4	0.03	MFSFVDLRLLLLLAATALLTHGQEEGQEEGQEEDIPAVTCIQDGLRYHDRAVWKPEPCRVCICDNGNVLCDDVICEDTKNCPGASVPKDECCPVCPEGQVSPTDDQTTGVEGPKGDTGPRGPRGPAGPPGRDGIPGQPGLPGPPGPPGPPGPPGLGGNFAPQLSYGYDEKSAGISVPGPMGPSGPRGLPGPPGAPGPQGFQGPPGEPGEPGASGPMGPRGPPGPPGKNGDDGEAGKPGRPGERGPPGPQGARGLPGTAGLPGMKGHRGFSGLDGAKGDAGPAGPKGEPGSPGENGAPGQMGPRGLPGERGRPGAPGPAGARGNDGATGAAGPPGPTGPAGPPGFPGAVGAKGEAGPQGARGSEGPQGVRGEPGPPGPAGAAGPAGNPGADGQPGAKGAN…	4.75	GQAGVMGFPGPK-GETGPSGPAGPTGAR-SGDRGEAGPAGPAGPIGPVGAR-GEAGPAGPAGPIGPVGAR-	#
20140224-517	uncharacterized protein [Camelus ferus][Equus caballus][Canis lupus familiaris]	gi%7c545198638 gi%7c545554766 gi%7c560936843	39931	173	17	4	0.09	MSGRGKQGGKARAKAKTRSSRAGLQFPVGRVHRLLRKGNYSERVGAGAPVYLAAVLEYLTAEILELAGNAARDNKKTRIIPRHLQLAIRNDEELNKLLGRVTIAQGGVLPNIQAVLLPKKTESHHKAKAARKSTSGKAPRKQLATKAARKSAPATGGVKKPHRYRPGTVALREIRRYQKSTELLIRKLPFQRLVREIAQDFKTDLRFQSSAVMALQEACKAYLVGLFEDTNLCAIHAKRVTIMPKDVQLAVGNLPCLVVTMSGRGKGGKGLGKGGAKRHRKVLRDNIQGITKPAIRRLARRGGVKRISGLIYEETRGVLKVFLENVIRDAVTYTEHAKRKTVTAMDVVYALKRQGRTLYGFGG	4.25	AGLQFPVGR-STELLIR-GLGKGGAKR-ISGLIYEETR-	#
	Sesame seed storage protein
20140224-517	11S globulin seed storage protein 2 [Sesamum indicum]	gi%7c75315270 gi%7c5381325	51798	81	10	2	0.04	MVAFKFLLALSLSLLVSAAIAQTREPRLTQGQQCRFQRISGAQPSLRIQSEGGTTELWDERQEQFQCAGIVAMRSTIRPNGLSLPNYHPSPRLVYIERGQGLISIMVPGCAETYQVHRSQRTMERTEASEQQDRGSVRDLHQKVHRLRQGDIVAIPSGAAHWCYNDGSEDLVAVSINDVNHLSNQLDQKFRAFYLAGGVPRSGEQEQQARQTFHNIFRAFDAELLSEAFNVPQETIRRMQSEEEERGLIVMARERMTFVRPDEEEGEQEHRGRQLDNGLEETFCTMKFRTNVESRREADIFSRQAGRVHVVDRNKLPILKYMDLSAEKGNLYSNALVSPDWSMTGHTIVYVTRGDAQVQVVDHNGQALMNDRVNQGEMFVVPQYYTSTARAGNNGFEWV…	5	AFYLAGGVPR-SPLAGYTSVIR-	#
	Mold
20140224-517	ADP_ATP carrier protein_ variant [Exophiala dermatitidis NIH/UT8656]	gi%7c378729274 gi%7c378729275	34518	208	44	4	0.14	MSGEVPQARKNVMGIPPFVIDFLMGGVSAAVSKTAAAPIERVKLLIQNQDEMIKAGRLDRRYNGIVECFSRTIKNEGVMSLWRGNTANVIRYFPTQALNFAFRDTYKSMFAFKKERDGYWKWMAGNLASGGAAGATSLLFVYSLDYARTRLANDAKSASKGGERQFNGLVDVYRKTLASDGIAGLYRGFGPSVLGIIVYRGLYFGMYDSIKPVLLVGPLEGNFLASFLLGWGVTTGAGIASYPLDTIRRRMMMTSGEAVKYKSSFDAARQIMAAEGIRSFFKGAGANILRGVAGAGVLSIYDQVQLLMFGKAYKGGSG	11	YFPTQALNFAFR-TLASDGIAGLYR-GFGPSVLGIIVYR-GAGANILR-	#
20140224-517	ADP_ATP carrier protein [Cladophialophora carrionii CBS 160.54]	gi%7c565933139	29045	208	44	4	0.16	MLKAGRLDRKYNGIIDCFSRTAKSEGVMALWRGNTANVIRYFPTQALNFAFRDTYKSMFAFKKERDGYWKWMAGNLASGGAAGATSLLFVYSLDYARTRLANDAKSAAKGGGDRQFNGLVDVYRKTLASDGIAGLYRGFGPSVLGIIVYRGLYFGMYDSIKPVLLVGPLEGNFLASFMLGWGVTTGAGIASYPLDTIRRRMMMTSGEAVKYKSSFDAAQKIMAAEGVRSFFKGAGANILRGVAGAGVLSIYDQVQLLMFGKKFKGGSG	11	YFPTQALNFAFR-TLASDGIAGLYR-GFGPSVLGIIVYR-GAGANILR-	#
20140224-517	ATP synthase subunit beta [Chelonia mydas]	gi%7c465991711	56225	231	33	4	0.09	MRWWETEVSARFIGSVKIPNEAFSSSGRNYAAKTSESAKSGTATGRIVAIIGAVVDVQFDEGLPPILNALEASGRETRLVLEVAQHLGENTVRTIAMDGTEGLTRGQRVLDTGAPIKIPVGPETLGRIMNVIGEPIDERGPIATKQFASIHAEAPEFQDMSVEQEILVTGIKVVDLLAPYAKGGKIGLFGGAGVGKTVLIMELINNVAKAHGGYSVFAGVGERTREGNDLYNEMIESGVINLKDATSKVSLVYGQMNEPPGARARVALTGLTVAEYFRDQEGQDVLLFIDNIFRFTQAGSEVSALLGRIPSAVGYQPTLATDMGTMQERITTTKKGSITSVQAIYVPADDLTDPAPATTFAHLDATTVLSRAIAELGIYPAVDPLDSTSRIMDPNIVGR…	8.25	TIAMDGTEGLTR-IGLFGGAGVGK-VALTGLTVAEYFR-FTQAGSEVSALLGR-	#
20140224-517	ATP synthase subunit beta [Capsaspora owczarzaki ATCC 30864]	gi%7c470326429 gi%7c320166885	57708	231	33	4	0.09	MLTSLARTTGRQLARQIASSAVRAAPRAAAAAALAARPAGLAAPQQRRAMTTVSTTPLAAAAAPAAANSRSVGSGRVVQVIGAVVDVQFDNELPAILNALEVQRDGARLVLEVAQHLGENTVRTIAMDGTEGLTRGQLCLDLGNPIEIPVGPECLGRIMNVIGEPIDERGPINAKKKLPIHVEAPPFVEMSTQQQILVTGIKVVDLLAPYAKGGKIGLFGGAGVGKTVLIQELINNVAKAHGGYSVFAGVGERTREGNDLYHEMIESGVIQLGKPGSKVALVYGQMNEPPGARARVALTGLTVAEYFRDEEGQDVLLFIDNIFRFTQAGSEVSALLGRIPSAVGYQPTLATDMGAMQERITTTRKGSITSVQAIYVPADDLTDPAPATTFAHLDATTVL…	8.25	TIAMDGTEGLTR-IGLFGGAGVGK-VALTGLTVAEYFR-FTQAGSEVSALLGR-	#
20140224-517	ATP synthase subunit beta_ mitochondrial-like [Chrysemys picta bellii]	gi%7c530593892	57698	231	33	4	0.09	MAMLLKLAFLRRRLKYGYAQVFNCFLALQASRHLHNSNNQDSYLGASGRNYVAETSESAKSGTATGRIVAIIGAVVDVQFDEDLPPILNALEVSDRETRLVLEVAQHLGGSTVRTIAMDGTEGLTRGQRVLDTGAPIKIPVGPETLGRIMNVIGEPIDERGPIATKQFASIHAEAPEFHDMSVEQEILVTGIKVVDLLAPYAKGGKIGLFGGAGVGKTVLIMELINNVAKAHGGYSVFAGVGERTREGNDLYNEMIESGVINLKDATSKVSLVYGQMNEPPGARARVALTGLTVAEYFRDQEGQDVLLFIDNIFRFTQAGSEVSALLGRIPSAVGYQPTLATDMGTMQERITTTKKGSITSVQAIYVPADDLTDPAPATTFAHLDATTVLSRAIAELGI…	8.25	TIAMDGTEGLTR-IGLFGGAGVGK-VALTGLTVAEYFR-FTQAGSEVSALLGR-	#
20140224-517	ATP synthase subunit beta_ mitochondrial-like_ partial [Pelodiscus sinensis]	gi%7c558104389	54223	231	33	4	0.09	LHSRAAGSGSLVAACAALPQRRNYVVKSSESAKSAGATGRIVAIIGAVVDVQFDEGLPPILNALEVTDRETRLVLEVAQHLGESTVRTIAMDGTEGLTRGQRVLDTGAPIKIPVGPETLGRIMNVIGEPIDERGPIATKQFASIHAEAPEFQDMSVEQEILVTGIKVVDLLAPYAKGGKIGLFGGAGVGKTVLIMELINNVAKAHGGYSVFAGVGERTREGNDLYNEMIESGVINLKDATSKVSLVYGQMNEPPGARARVALTGLTVAEYFRDQEGQDVLLFIDNIFRFTQAGSEVSALLGRIPSAVGYQPTLATDMGTMQERITTTKKGSITSVQAIYVPADDLTDPAPATTFAHLDATTVLSRAIAELGIYPAVDPLDSTSRIMDPNIVGKEHYDVA…	8.25	TIAMDGTEGLTR-IGLFGGAGVGK-VALTGLTVAEYFR-FTQAGSEVSALLGR-	#
20140224-517	woronin body major protein [Ajellomyces capsulatus G186AR]	gi%7c225554508	58134	123	28	4	0.07	MRYASNGNRLEKTKRHAYQSPSIDNWNSSISGGLEGREDSRHRCGYFAGKSRRAGQGPRQRSNTSPGSSANITAILGRFPAKSMLDRYPMHGLTSFSEMHSRKDASRTVNLDFDARVPIPFSVFPSSYRSDAVSETTHTRVEGEVNLTGASRVEREDTGYEGQLPSRSYQEADIHIHSDRRPHEEHPRTRYPEVELSRERYYGNQDRKVWETQLDITEREYRQRTDPNFQVEYAPRPTQFRDVDPYSNNRQFEQIDTTGAPSHVSEVDYASRGSERVYSETNVDRRTVIEESPRKMGYYDDEGHYHSFRRGVERAADRILHPHHHHDRKEEVVITDDRGPTRVRDGVRESVRVVQPRGGHPPETITIPCHFIRVGDLLILQGRPCQVIRISVSPQTGQH…	7	TVNLDFDAR-ISVSPQTGQHR-YLGVDLFTR-ALVINDGGR-	#
20140224-517	hypothetical protein SS1G_01081 [Sclerotinia sclerotiorum 1980]	gi%7c156061934 gi%7c154696419	78159	163	26	3	0.04	MQLAAVLSLVGLVTAQCPYGFDTPLQKRESIDAQASSSSFLNQFTINDTDAHFTTDAGGPMQEDTSLKAGERGPTLLEDFIFRQKIQHFDHERVPERAVHARGAGAHGVFTSYGNYSNITAASFLNEQGKETPVFVRFSTVAGSRGSADTARDVHGFATRFYTDEGNFDIVGNNIPVFFIQDAILFPDLIHAVKPSPDNEIPQAATAHDSAWDFFSQQPSSLHTLFWAMAGNGIPRSFRHMDGFGVHTFRLVTDSGSSKLIKWHWKSKQGKASLVWEEAQVLAGKNADFHRKDLWDAIESGNGPEWELGIQVVEEDDVLKFGFDLLDPTKMIPEELVPVERIGVMKLNANPRNYFAETEQIMFQPGHIVRGVDFTDDPLLQGRIFSYLDTQLNRHGGPN…	8.66667	GPTLLEDFIFR-FGFDLLDPTK-GVDFTDDPLLQGR-	#
20140224-517	catalase [Penicillium citrinum]	gi%7c82754305	80681	163	26	3	0.04	MHLLAFATDLVGIANAACPYMTGEVPGDYSPHELHRRADEGAADNTEEFLSQFYLNDKDAYLTSDVGGPIEDQNSLSAGERGPTLLEDFIFRQKIQHFDHERVPERAVHARGAGAHGVFTSYADWSNITAASFLSKKDKETPMFVRFSTVAGSRGSADTARDVHGFATRFYTDEGNFDIVGNNIPVFFIQDAIQFPDLIHAVKPSGDNEIPQAATAHDSAWDFFSQQPSSLHTLLWAMAGHGIPRSFRNVDGFGVHTFRFVTDSGKSKLVKFHWKGLQGKASLVWEEAQQISGKNPDFLRQDLWDAIEAGRFPEWELGVQIMDEEDQLRFGFDLLDPTKIVPEEIIPVTKLGKMTLNRNPRNYFAETEQVMFQPGHIVRGVDFTDDPLLQGRLFSYLDT…	8.66667	GPTLLEDFIFR-FGFDLLDPTK-GVDFTDDPLLQGR-	#
20140224-517	Pc12g03370 [Penicillium chrysogenum Wisconsin 54-1255]	gi%7c255931331 gi%7c211581841	59549	117	22	3	0.06	MFRNALRSSSRSVAAVSATGRIASVRAAAAGPLNGVRSYASEAKAAPTEVSSILEQRIRGVSEEAGLAETGRVLSVGDGIARVHGMSNVQAEELVEFASGVKGMCMNLEAGQVGVVLFGSDRLVKEGETVKRTGEIVEVPVGPELLGRVVDALGNPIDGKGPLNTKQKARAQLKAPGILPRQSVNQPVQTGMKCVDSMVPIGRGQRELIIGDRQTGKTAVALDTMLNQKRWNNNKAATEDEKLYCIYVAVGQKRSTVAQLVKTLEEQDAMKYSVIIAATASEAAPLQYIAPFTGCAMGEWFRDNGRHAVIIYDDLSKQAVAYRQMSLLLRRPPGREAYPGDVFYLHSRLLERAAKMNKTHGAGSLTALPIIETQGGDVSAYIPTNVISITDGQIFLESE…	7.33333	VLSVGDGIAR-TGEIVEVPVGPELLGR-STVAQLVK-	#
20140224-517	hypothetical protein SNOG_14904 [Phaeosphaeria nodorum SN15]	gi%7c169623333 gi%7c189192066 gi%7c330920758 gi%7c111056636 gi%7c187973978 gi%7c311327290 gi%7c482807604	11393	125	21	3	0.26	MTGRGKGGKGLGKGGAKRHRKILRDNIQGITKPAIRRLARRGGVKRISAMIYEETRGVLKTFLESVIRDAVTYTEHAKRKTVTSLDVVYALKRQGRTLYGFGG	7	GLGKGGAKR-ISAMIYEETR-TFLESVIR-	#
20140224-517	Pc12g12440 [Penicillium chrysogenum Wisconsin 54-1255]	gi%7c255933175 gi%7c211582677	11379	125	21	3	0.26	MSGRGKGGKGLGKGGAKRHRKILRDNIQGITKPAIRRLARRGGVKRISAMIYEETRGVLKTFLESVIRDAVTYTEHAKRKTVTSLDVVYALKRQGRTLYGFGG	7	GLGKGGAKR-ISAMIYEETR-TFLESVIR-	#
20140224-517	hypothetical protein LEMA_P009440.1 [Leptosphaeria maculans JN3]	gi%7c396500080 gi%7c312222217	25314	125	21	3	0.11	MVSMIACLVIRVTLERRSTHELFTNHDIASRSLPGCARQHGCTMIPSKIAPVADLTKGLEALLRKGLGNHALLAMRLTGCWLSVLQHFSLLSNPEFCSSHPRSCIFQSKTNNDSAFLFIYAKYVGNMTGRGKGGKGLGKGGAKRHRKILRDNIQGITKPAIRRLARRGGVKRISAMIYEETRGVLKTFLESVIRDAVTYTEHAKRKTVTSLDVVYALKRQGRTLYGFGG	7	GLGKGGAKR-ISAMIYEETR-TFLESVIR-	#
20140224-517	hypothetical protein COCHEDRAFT_1201591 [Bipolaris maydis C5]	gi%7c452002709	18763	125	21	3	0.15	MTGRKYIDISLPAATLIAFRARCIVGVASLPASGQEARLVLRLNASPHYCAAPLTQPIRAYHHLHTLYMYSGKGGKGLGKGGAKRHRKILRDNIQGITKPAIRRLARRGGVKRISAMIYEETRGVLKTFLESVIRDAVTYTEHAKRKTVTSLDVVYALKRQGRTLYGFGG	7	GLGKGGAKR-ISAMIYEETR-TFLESVIR-	#
20140224-517	Pc13g14270 [Penicillium chrysogenum Wisconsin 54-1255]	gi%7c255938129 gi%7c211584455	26961	88	11	2	0.07	MSTEIDPKKIIAEVSGHDIDQWVRTAAFKPEVEEAGGSVLSQAFICENCNSSPNSYQSIRGHIHQELTGWLFFRKLGADCSRSNISLHGFARLWERSAAECLADFKWLEKYLIARGGRSKPTSIEATTFEWPDNPIEPVGPCKEAFFVEKKLLEDLERLCSLADKSGDAALTDAIQSRFMHKETRHVKSLGDLLRQVVRVSKQPGLGIYLLDRELRDSDGIVPWDCNNETLQRGDDPAEV	5.5	SNISLHGFAR-SLGDLLR-	#
20140224-517	beta-tubulin_ partial [Aspergillus fumigatus]	gi%7c15625248	44723	88	8	2	0.04	MREIVHLQTGQCGNQIGAAFWQTISGEHGLDGSGHYNGSSDLQLERMNVYFNEANGDKYVPRAVLVDLEPGTMDAVRAGPFGELFRPDNFVFGQSGAGNNWAKGHYTEGAELVDQVIDVVRREAEGCDCLQGFQVTHSLGGGTGAGMGTLLISKIREEFPDRMMATFSVVPSPKVSDTVVEPYNATLSVHQLVEHSDETFCIDNEALYDICMRTLKLSNPSYGDLNHLVSAVMSGVTTCLRFPGQLNSDLRKLAVNMVPFPRLHFFMVGFAPLTSRGAHSFRAVSVPELTQQMFDPKNMMAASDFRNGRYLTCSAIFRGKVSMKEVEDQMRNIQSKNQSYFVEWIPNNIQTALCSIPPRGLKMSSTFIGNSTSIQELFKRVGDQFTAMFRRKAFLHWYT…	4	LAVNMVPFPR-VGDQFTAMFR-	#
20140224-517	beta-tubulin [Blumeria graminis f. sp. avenae]	gi%7c31043659	49674	88	8	2	0.04	MREIVHLQTGQCGNQIGAAFWQTISGEHGLDGSGVYNGTSDLQLERMNVYFNEASGNKYVPRAVLVDLEPGTMDAVRAGPFGQLFRPDNFVFGQSGAGNNWAKGHYTEGAELVDQVLDVVRREAEGCDCLQGFQITHSLGGGTGAGMGTLLISKIREEFPDRMMATFSVVPSPKVSDTVVEPYNATLSVHQLVENSDETFCIDNEALYDICMRTLKLSNPSYGDLNHLVSAVMSGVTTCLRFPGQLNSDLRKLAVNMVPFPRLHFFMVGFAPLTSRGAHSFRAVTVPELTQQMFDPKNMMAASDFRNGRYLTCSAILRGKVSMKEVEDQMRNVQLKNVSYFVEWIPNNVQTALCSIPPRGLKMSSTFVGNSTSIQELFKRVGDQFTAMFRRKAFLHWYT…	4	LAVNMVPFPR-VGDQFTAMFR-	#
20140224-517	beta-tubulin [Botryotinia fuckeliana]	gi%7c4376176 gi%7c745084	35008	88	8	2	0.06	TEGAELVDQVLDVVRREAEGCDCLQGFQITHSLGGGTGAGMGTLLISKIREEFQDRMMATFSVVPSPKVSDTVVEPYNATLSVHQLVENSDETFCIDNEALYDICMRTLKLSNPSYGDLNHLVSAVMSGVTTCLRFPGQLNSDLRKLAVNMVPFPRLHFFMVGFAPLTSRGAHSFRAVTVPELTQQMYDPKIMMAASDFRNGRYLTCSAIFRGKVSMKEVEDQMRNVQNKNSSYFVEWIPNNVQTALCSIPPRGLKMSSTFVGNWTSIQELFKRVGDQFTAMFRRKAFLHWYTGEGMDEMEFTEAESNMNDL	4	LAVNMVPFPR-VGDQFTAMFR-	#
20140224-517	beta-tubulin [Leptosphaeria biglobosa 'brassicae' group]	gi%7c55982518 gi%7c55982520 gi%7c55982524 gi%7c55982526 gi%7c55982528	33766	88	8	2	0.06	WAKGHYTEGAELVDQVLDVVRREAEGCDCLQGFQITHSLGGGTGAGMGTLLISKIREEFPDRMMATFSVVPSPKVSDTVVEPYNATLSVHQLVENSDETFCIDNEALYDICMRTLKLNNPSYGDLNHLVSAVMSGVTTCLRFPGQLNSDLRKLAVNMVPFPRLHFFMVGFAPLTSRGAHSFRAVTVPELTQQMFDPKNMMAASDFRNGRYLTCSAYFRGKVSMKEVEDQMRNVQNKNSAYFVEWIPNNVQTALCSVPPRGLKMSSTFVGNSTSIQELFKRVGDQFTAMFRRKAFLHWYTGEG	4	LAVNMVPFPR-VGDQFTAMFR-	#
20140224-517	beta-tubulin [Leptosphaeria maculans]	gi%7c7673696	49769	88	8	2	0.04	MREIVHLQTGQCGNQIGAAFWQTISGEHGLDGSGVYNGTSDLQLERMNVYFNEASGNKFVPRAVLVDLEPGTMDAVRAGPFGQLFRPDNFVFGQSGAGNNWAKGHYTEGAELVDQVLDVVRREAEGCDCLQGFQITHSLGGGTGAGMGTLLISKIREEFPDRMMATFSVVPSPKVSDTVVEPYNATLSVHQLVENSDETFCIDNEALYDICMRTLKLNNPSYGDLNHLVSAVMSGVTTCLRFPGQLNSDLRKLAVNMVPFPRLHFFMVGFAPLTSRGAHSFRAVTVPELTQQMFDPKNMMAASDFRNGRYLTCSAYFRGKVSMKEVEDQMRNVQNKNSSYFVEWIPNNVQTALCSVPPRGLKMSSTFVGNSTSIQELFKRVGDQFTAMFRRKAFLHWYT…	4	LAVNMVPFPR-VGDQFTAMFR-	#
	Sample 2#
	18.9mg
	Sesame seed proteins
20130513_tam109	11S globulin seed storage protein 2 [Sesamum indicum]	gi%7c75315270 gi%7c5381325	51798	582	109	11	0.25	MVAFKFLLALSLSLLVSAAIAQTREPRLTQGQQCRFQRISGAQPSLRIQSEGGTTELWDERQEQFQCAGIVAMRSTIRPNGLSLPNYHPSPRLVYIERGQGLISIMVPGCAETYQVHRSQRTMERTEASEQQDRGSVRDLHQKVHRLRQGDIVAIPSGAAHWCYNDGSEDLVAVSINDVNHLSNQLDQKFRAFYLAGGVPRSGEQEQQARQTFHNIFRAFDAELLSEAFNVPQETIRRMQSEEEERGLIVMARERMTFVRPDEEEGEQEHRGRQLDNGLEETFCTMKFRTNVESRREADIFSRQAGRVHVVDRNKLPILKYMDLSAEKGNLYSNALVSPDWSMTGHTIVYVTRGDAQVQVVDHNGQALMNDRVNQGEMFVVPQYYTSTARAGNNGFEWV…	9.90909	ISGAQPSLR-IQSEGGTTELWDER-LVYIER-AFYLAGGVPR-AFDAELLSEAFNVPQETIR-AFDAELLSEAFNVPQETIRR-GLIVMAR-VNQGEMFVVPQYYTSTAR-AGNNGFEWVAFK-SPLAGYTSVIR-GSQSFLLSPGGR-	#
20130513_tam109	11S globulin precursor isoform 4 [Sesamum indicum]	gi%7c81238594	52650	404	60	10	0.27	MAKLFLSLLTFLLLFSLSFALRGSTWQQGQCRISRINAQEPTRRIQAEGGVSEFWDHNSDEFQCAGVSIHRHRLQARALMLPAYHNAPILAYVQQGRGMYGVMISGCPETFESSQQQFEEGRGAQRFRDRHQKIGQFREGDILAFPAGAAHWAYNNGDQELVIVVLQDNANNANQLDPNPRSFFLAGNPAGRGQEQQEYAPQLGRKRGQHQFGNVFRGFDVQILSEVFGVDEQAARSLQGENDERGHIITVARGLQVISPPLQREEYGRQEEEPYYGRRDNGLEETICSAKLRENIDKPSRADIYNPRAGRFSTINSLTLPILSFLQLSAARGVLYRNGIMAPHWCVNAHSVIYVTRGESDMQIVSHNGQAVFDGRVREGQVVVVPQNFAVVKRAGEQG…	6	ALMLPAYHNAPILAYVQQGR-SFFLAGNPAGR-GQEQQEYAPQLGR-GHIITVAR-GLQVISPPLQR-ADIYNPR-FSTINSLTLPILSFLQLSAAR-EGQVVVVPQNFAVVK-GLPADVIANAYQISR-ETMMFSGSFR-	#
20130513_tam109	11S globulin precursor isoform 3 [Sesamum indicum]	gi%7c81238592	55306	288	66	7	0.2	MANSLLLLSLSLSFLFLFHGCVAQLELQQQRYWQSLQQHQQHRLRAKTECQVQQLTARQPSSRLQSEAGVTEFWDANNEEFQCAGIEFVRHTIQPRGLLLPYYTNAPQLVYIVRGSGIQGTVIPGCAETYESESGVGSTGEEEGRQRTDRHQKLRRFRRGDVLALREGVTHWAYNDGDTPIISVSIRDVANEANQLDLKFRKFFLAGNPQTAQFQGQQEREQQPRGEGRRGQEEGQGTSNIFNGFNEEFLAESFNTDPQLIRKLQSREDNRGIIVRAERPLRLVLPEYGREEQQRQREQGRGGGYMNGLEETICSLRIRENIEHTAATHSYNPRGGRISTINSQTLPILSQLRLSAEKGVLYRNGITAPHWSTNSHSALYVTRGSARIQVVGHKGRSVL…	9.42857	RGDVLALR-EGVTHWAYNDGDTPIISVSIR-ISTINSQTLPILSQLR-NGITAPHWSTNSHSALYVTR-AGEQGFEYVTFR-AMPDEVVMNAFGVSR-DEATVFSPGGR-	#
20130513_tam109	11S globulin [Sesamum indicum]	gi%7c13183173	56553	149	15	6	0.14	MALTSLLSFFIVVTLLIRGLSAQLAGEQDFYWQDLQSQQQHKLQARTDCRVERLTAQEPTIRFESEAGLTEFWDRNNQQFECAGVAAVRNVIQPRGLLLPHYNNAPQLLYVVRGRGIQGTVIPGCAETFERDTQPRQDRRRRFMDRHQKVRQFRQGDILALPAGLTLWFYNNGGEPLITVALLDTGNAANQLDQTFRHFFLAGNPQGGRQSYFGRPQTEKQQGETKNIFNGFDDEILADAFGVDVQTARRLKGQDDLRGRIVRAERLDIVLPGEEEEERWERDPYSGANGLEETLCTAKLRENLDEPARADVYNPHGGRISSLNSLTLPVLSWLRLSAEKGVLYRNGLVAPHWNLNAHSIIYITRGSGRFQVVGHTGRSVFDGVVREGQLIIVPQNYVV…	2.5	LTAQEPTIR-LRENLDEPAR-ISSLNSLTLPVLSWLR-SVFDGVVR-EGQLIIVPQNYVVAK-TNDNAMTSQLAGR-	#
	non-oilseed plant proteins
20130513_tam109	globulin-1 S allele precursor [Zea mays]*	gi%7c195658011	49933	97	10	2	0.04	MKVPVLLLLVSLCFSLALAWQTDTESGSGRPYHYGEESFRHWTRSRQGRFRVLERFTHELLEDAVGNYRVAELEAAPRTFLQPSHYDADEVMFVKEGEGVIVLLRGGKRESFCVREGDVMVIPAGAVVYSANTHQSEWFRVVMLLSPVVSTSGRFEEFFPIGGESPESFLSVFSDDVIQASFNTRREEWEKVFEKQSKGEITTASEEQIRELSRSCSRGGRGSRGEGGDSGSSSSSKWEIKPSSLTDKKPTHSNSHGRHYEITGDECPHLRLLDMDVGLANIARGSMMAPSYNTRANKIAIVLKGQGYFEMACPHVSGGRSSPRRERGHGREEEEEREEEQGGGGGQKARSYRQVKSRIREGSVIVIPAGHPTALVAGEDKNLAVLCFEVNASFDDKVF…	5	VAELEAAPR-EGEGVIVLLR-	#
20130513_tam109	embryo globulin [Hordeum vulgare subsp. vulgare][Triticum aestivum]	gi%7c167004 gi%7c170696 gi%7c448281 gi%7c215398470	72209	92	10	2	0.02	MATRAKATIPLLFLLGTSLLFAAAVSASHDDEDDRRGGHSLQQCVQRCRQERPRYSHARCVQECRDDQQQHGRHEQEEEQGRGRGWHGEGEREEEHGRGRGRHGEGEREEEHGRGRGRHGEGEREEERGRGHGRHGEGEREEERGRGRGRHGEGEREEEEGRGRGRRGEGERDEEQGDSRRPYVFGPRSFRRIIQSDHGFVRALRPFDQVSRLLRGIRDYRVAIMEVNPRAFVVPGFTDADGVGYVAQGEGVLTVIENGEKRSYTVKEGDVIVAPAGSIMHLANTDGRRKLVIAKILHTISVPGKFQFLSVKPLLASLSKRVLRAAFKTSDERLERLFNQRQGQEKTRSVSIVRASEEQLRELRREAAEGGQGHRWPLPPFRGDSRDTFNLLEQRPKIA…	5	VAIMEVNPR-EVQEVFR-	#
	Animal proteins
20130513_tam109	Hemoglobin subunit beta-C(NA) [various rumunants]	gi%7c122549	15623	612	209	12	0.38	PBKALITGFWSKVKVBZVGAZALGRLLVVYPWTZRFFZHFGBLSSABAVMBBAKVKAHGKKVLBSFSBGLKHLBBLKGAFASLSZLHCBKLHVBPZBFRLLGBVLVVVLARHFGKZFBPZLZAZFZKVVAGVASALAHRYH	17.4167	VKVDEVGAEALGR-VNEVGAEALGR-VDEVGAEALGR-VDQVGAEALGR-VDEVGAEALGR-VDQVGAEALGR-VDEVGAEALGR-VDEVGAQALGR-VDEVGAEALGR-VDEVGAQALGR-VDEVGAEALGR-VDQVGAEALGR-VDEVGAEALGR-LLVVYPWTQR-LLVVYPWTER-LLVVYPWTQR-LLVVYPWTER-VLDSFSDGLK-LHVDPENFR-LHVDPEDFR-LLGNVLVVVLAR-LLGDVLVVVLAR-LLGNVLVVVLAR-LLGDVLVVVLAR-LLGNVLVVVLAR-LLGDVLVVVLAR-LLGNVLVVVLAR-LLGDVLVVVLAR-	#
20130513_tam109	hemoglobin alpha [various ruminants]	gi%7c229335	15064	384	91	9	0.31	VLSAABKSBVKAAWGKVGGBAAGYGAEALZRMFLSFPTTKTYFPHFDLSHGSAZVKGHGQKVAAALTKAVGHLBZLPGTLSZLSZLHAHKLRVDPVBFKLLSHSLLVTLACHLPBDFTPAVHASLBKFLABVSTVLTSKYR	10.1111	VGGNAAGYGAEALER-VGGDAAGYGAEALER-VGGNAAGYGAEALER-VGGDAAGYGAEALER-VGGNAAGYGAEALER-VGGDAAGYGAEALER-VGGNAAGYGAEALER-VGGDAAGYGAEALER-VGGNAAGYGAEALER-VGGDAAGYGAEALER-VGGNAAGYGAEALER-MFLSFPTTK-LRVDPVNFK-LRVDPVDFK-VDPVNFK-VDPVDFK-FLANVSTVLTSK-FLADVSTVLTSK-FLANVSTVLTSK-FLADVSTVLTSK-FLANVSTVLTSK-FLADVSTVLTSK-	#
20130513_tam109	Hemoglobin subunit beta [various ruminants]	gi%7c122686 gi%7c195927258 gi%7c195927260 gi%7c1209 gi%7c86129751	16063	433	223	8	0.55	MLTAEEKAAVTGFWGKVKVDEVGAEALGRLLVVYPWTQRFFEHFGDLSNADAVMNNPKVKAHGKKVLDSFSNGMKHLDDLKGTFAQLSELHCDKLHVDPENFRLLGNVLVVVLARHHGNEFTPVLQADFQKVVAGVANALAHKYH	27.875	AAVTGFWGK-VKVDEVGAEALGR-VDEVGAEALGR-LLVVYPWTQR-LHVDPENFR-LLGNVLVVVLAR-HHGNEFTPVLQADFQK-VVAGVANALAHK-	#
20130513_tam109	albumin precursor [Capra hircus][Ovis aries]	gi%7c193085052 gi%7c57164373 gi%7c113582 gi%7c1387	66270	250	47	7	0.1	DTHKSEIAHRFNDLGEENFQGLVLIAFSQYLQQCPFDEHVKLVKELTEFAKTCVADESHAGCDKSLHTLFGDELCKVATLRETYGDMADCCEKQEPERNECFLKHKDDSPDLPKLKPEPDTLCAEFKADEKKFWGKYLYEVARRHPYFYAPELLYYANKYNGVFQECCQAEDKGACLLPKIETMREKVLASSARQRLRCASIQKFGERALKAWSVARLSQKFPKADFTDVTKIVTDLTKVHKECCHGDLLECADDRADLAKYICDHQDTLSSKLKECCDKPVLEKSHCIAEIDKDAVPENLPPLTADFAEDKEVCKNYQEAKDVFLGSFLYEYSRRHPEYAVSVLLRLAKEYEATLEDCCAKEDPHACYATVFDKLKHLVDEPQNLIKKNCELFEKHGE…	6.71429	YLYEVAR-DVFLGSFLYEYSR-RHPEYAVSVLLR-HPEYAVSVLLR-KAPQVSTPTLVEISR-APQVSTPTLVEISR-TVMENFVAFVDK-	#
20130513_tam109	catalase [Capra hircus][Ovis aries]	gi%7c242200439 gi%7c426245288	57919	116	14	4	0.1	ASDQMKHWKEQRAAQKPDVLTTGAGNPVGDKLNVLTVGPRGPLLVQDVVFTDEMAHFDRERIPERVVHAKGAGAFGYFEVTHDITRYSKAKVFEHIGKRTPIAVRFSTVAGESGSADTVRDPRGFAVKFYTEDGNWDLVGNNTPIFFIRDALLFPSFIHSQKRNPQTHLKDPDMVWDFWSLRPESLHQVSFLFSDRGIPDGHRHMNGYGSHTFKLVNANGEAVYCKFHYKTDQGIKNLSVEDAARLAHEDPDYGLRDLFNAIATGNYPSWTLYIQVMTFSEAETFPFNPFDLTKVWPHNDYPLIPVGKLVLNRNPVNYFAEVEQLAFDPSNMPPGIEPSPDKMLQGRLFAYPDTHRHRLGPNYLQIPVNCPYRARVANYQRDGPMCMMDNQGGAPNYYP…	3.5	LNVLTVGPR-GAGAFGYFEVTHDITR-FSTVAGESGSADTVR-LAHEDPDYGLR-	#
20130513_tam109	vimentin [Bos taurus][Ovis aries][Capra hircus]	gi%7c110347570 gi%7c146291097 gi%7c109659186 gi%7c296481436 gi%7c145226795 gi%7c548489822	53695	112	13	4	0.09	MSTRSVSSSSYRRMFGGPGTASRPSSTRSYVTTSTRTYSLGSALRPTTSRTLYTSSPGGVYATRSSAVRLRSGVPGVRLLQDSVDFSLADAINTEFKNTRTNEKVELQELNDRFANYIDKVRFLEQQNKILLAELEQLKGQGKSRLGDLYEEEMRELRRQVDQLTNDKARVEVERDNLAEDIMRLREKLQEEMLQREEAESTLQSFRQDVDNASLARLDLERKVESLQEEIAFLKKLHDEEIQELQAQIQEQHVQIDMDVSKPDLTAALRDVRQQYESVAAKNLQEAEEWYKSKFADLSEAANRNNDALRQAKQESNEYRRQVQTLTCEVDALKGTNESLERQMREMEENFSVEAANYQDTIGRLQDEIQNMKEEMARHLREYQDLLNVKMALDIEIAT…	3.25	TLYTSSPGGVYATR-LGDLYEEEMR-EEAESTLQSFR-MALDIEIATYR-	#
20130513_tam109	carbamoyl-phosphate synthase [ammonia]_ mitochondrial [Bos taurus][Ovis aries][Capra hircus]	gi%7c300795597 gi%7c296490401 gi%7c426222577 gi%7c548454754	164636	124	11	4	0.02	MTRILTACKVVKTLKTSFGLTNVTAHHQWKFARPGIRLLSVKAQTAHIVLEDGTKMKGYSFGHPSSVAGEVVFNTGLAGYPEALTDPAYKGQILTMANPIVGNGGAPDTAALDELGLSKYLESDGIKVAGLLVLNYSDDYHHWLATKSLGQWLREEKVPAIYGVDTRMLTKIIRDKGTMLGKIEFEGQSVDFVDPNKQNLIAEISTKDVKVYGKGNPMKVVAVDCGIKNSVIRLLVKRGAEVHVVPWNHDFTKMEYDGLLIAGGPGNPALAQPLIQNVKKILESDRKEPLFGISTGNLITGLAAGAQVYKMSMANRGQNQPVLNITNRQAFITAQNHGYALDSTLPAGWKPLFVNVNDQTNEGIMHESKPFFGVQFHPEVGPGPTDTEYLFDSFVSLIK…	2.75	VSINVVR-IALGIPLPEIK-SIFSAVLDELK-TLGIDFIDVATK-	#
20130513_tam109	3-hydroxyacyl-CoA dehydrogenase type-2 [Bos taurus][Ovis aries][Capra hircus]	gi%7c27805907 gi%7c3183024 gi%7c1944011 gi%7c83759185 gi%7c296470680 gi%7c426256978 gi%7c548531502	27123	137	8	4	0.25	MAAACRSVKGLVALITGGASGLGLATAERLVGQGATAVLLDLPNSDGETQAKKLGKSCAFAPADVTSEKDVQAALTLAREKFGRVDVAVNCAGIAVASKTYNLKKSQAHTLEDFQRVINVNLIGTFNVIRLVAGEMGQNEPDQGGQRGVIINTASVAAFEGQVGQAAYSASKGGIVGMTLPIARDLAPMGIRVMTIAPGLFGTPLLTTLPDKVRNFLASQVPFPSRLGDPAEYAHLVQAIIENSFLNGEVIRLDGAIRMQP	2	GLVALITGGASGLGLATAER-DVQAALTLAR-LVAGEMGQNEPDQGGQR-VMTIAPGLFGTPLLTTLPDK-	#
20130513_tam109	regucalcin [Otolemur garnettii]	gi%7c395854394	33239	108	6	2	0.1	MSSIKIECVLPEHCRCGESPVWEEASNSLLFVDIPARKVCRWNSLTKQVQRMTVDAPVSSVALRQSGGYVATIGTKFCALNWENQSVVVLATVDKDKKNNRFNDGKVDPTGRYFAGTMAEETAPAVLERRQGSLYSLFPDHHVEKYFDQVDISNGLDWSLDHKIFYYIDSLSYSVDAFDYDLKTGQIANRRSVYKLEKEEQIPDGMCMDAEGKLWVACYNGGRVIRLDPETGKRLQTVKLPVDKTTSCCFGGKDYSEMYVTSARDGMDSEGLLKQPQAGGIFKITGLGVKGIAPTPYAG	3	MTVDAPVSSVALR-YFAGTMAEETAPAVLER-	#
	Mold
20130513_tam109	ATP synthase beta chain_ mitochondrial precursor [Aspergillus terreus NIH2624]	gi%7c115401284 gi%7c114190171	53649	571	145	10	0.27	MFKSGLARTFGRAAFARPSVARRALPSKLNGLPSLARFASTDSSVGKIHQVIGAVVDVKFEGEKLPAILNAIETENNGQKLVLEVSQHLGENVVRTIAMDGTEGLTRGAAARDTGAPITIPVGPGTLGRILNVTGDPIDERGPVKATTYLPIHTEAPPFTEQSTEAEILVTGIKVVDLLAPYARGGKIGLFGGAGVGKTVFIQELINNIAKAHGGYSVFCGVGERTREGNDLYHEMQETGVIQLDGESKVSLVFGQMNEPPGARARVALTGLTIAEYFRDQEGQDVLLFIDNIFRFTQAGSEVSALLGRIPSAVGYQPTLAVDMGGMQERITTTTKGSITSVQAVYVPADDLTDPAPATTFAHLDATTVLSRGISELGIYPAVDPLDSKSRMLDARIVG…	14.5	TIAMDGTEGLTR-ILNVTGDPIDER-VVDLLAPYAR-IGLFGGAGVGK-TVFIQELINNIAK-VSLVFGQMNEPPGAR-VALTGLTIAEYFR-FTQAGSEVSALLGR-GISELGIYPAVDPLDSK-FLSQPFTVAQVFTGIEGK-	#
20130513_tam109	peroxisomal multifunctional beta-oxidation protein (MFP)_ putative [Neosartorya fischeri NRRL 181]	gi%7c119487120 gi%7c119410572	96677	410	92	9	0.12	MSELRFDNQTVVVTGAGGGLGKAYATFFASRGANVVVNDLGVSHSGEGASSKAADVVVEEIRAAGGKAVANYDSVENGEAIIETAIKNFGRIDVLINNAGILRDVSFKNMKDQDWDLINKVHTYGAYKCARAAWPHFRKQKYGRIINTASAAGLFGNFGQANYSAAKLGQVGFTETLAKEGAKYNIIANVIAPIAASRMTATIMPPEVLENLKPDWIVPLVAVLVHPSNTTESGSIFEVGGGHMAKLRWERAKGALLKTDASLTPGAIARKWKDVYDYSQPEYPTGPADFMSLLENGMKTPSAPTGEEPDLKGKVALVTGGGNGLGRSYCLLFAKLGASVVVNDLVDPEPVVQEIKKMGGKAVGNKASCEDGDAVVKTAIDAFGRIDILVNNAGILRDK…	10.2222	FDNQTVVVTGAGGGLGK-AYATFFASR-LGQVGFTETLAK-YNIIANVIAPIAASR-IDILVNNAGILR-LGILGLSR-VNTIAPNAGTNMTR-TSEDQAALYR-FAGVVLPGQTLK-	#
20130513_tam109	ATP synthase alpha chain_ mitochondrial precursor [Aspergillus terreus NIH2624]	gi%7c115396612 gi%7c114193514	59832	355	55	9	0.14	MFRNALRQSGRAVAAASATGRIATARAAVPGPLAGASKQVRSYAAEAKASPTEVSSILEQRIRGVQEESGLAETGRVLSVGDGIARVHGMTNVQAEELVEFASGVKGMCMNLEAGQVGVVLFGSDRLVKEGETVKRTGEIVDVPVGPELLGRVVDALGNPIDGKGPINAKAKSRAQLKAPGILPRRSVNQPVQTGMKCVDSMVPIGRGQRELIIGDRQTGKTAVALDAMLNQKRWNNSSDESKKLYCIYVAVGQKRSTVAQLVKTLEENDAMKYSIIVAATASEAAPLQYLAPFTGCAMGEWFRDNGRHAVIVYDDLSKQAVAYRQMSLLLRRPPGREAYPGDVFYLHSRLLERAAKMNEKHGGGSLTALPVIETQGGDVSAYIPTNVISITDGQIFLE…	6.11111	ASPTEVSSILEQR-IRGVQEESGLAETGR-GVQEESGLAETGR-VLSVGDGIAR-VVDALGNPIDGK-APGILPR-TAVALDAMLNQK-QMSLLLR-LFLAQYR-	#
20130513_tam109	beta-tubulin [Botryotinia fuckeliana]	gi%7c1002511	49708	237	52	6	0.15	MREIVHLQTGQCGNQIGAAFWQTISGEHGLDGSGVYNGTSDLQLERMNVYFNEASGNKYVPRAVLVDLEPGTMDAVRAGPFGQLFRPDNFVFGQSGAGNNWAKGHYTEGAELVDQVLDVVRREAEGCDCLQGFQITHSLGGGTGAGMGTLLISKIREEFPDRMMATFSVVPSPKVSDTVVEPYNATLSVHQLVENSDATFCIDNEALYDICMRTLKLSNPSYGDLNHLVSAVMSGVTTCLRFPGQLNSDLRKLAVNMVPFPRLHFFMVGFAPLTSRGAHSFRAVTVPELTQQMYDPKNMMAASDFRNGRYLTCSAIFRGKVSMKEVEDQMRNVQNKNSSYFVEWIPNNVQTALCSIPPRGLKMSSTFVGNSTSIQELFKRVGDQFTAMFRRKAFLHWYT…	8.66667	AVLVDLEPGTMDAVR-MMATFSVVPSPK-FPGQLNSDLR-LAVNMVPFPR-LHFFMVGFAPLTSR-VGDQFTAMFR-	#
20130513_tam109	tubulin beta chain [Coccidioides immitis RS]	gi%7c119184209 gi%7c303320249 gi%7c240109810 gi%7c320031976 gi%7c392865933	49917	237	52	6	0.15	MREIVHLQTGQCGNQIGAAFWQIISGEHGLDSSGMYAGSSDLQLERMNVYFNEAAGRKYVPRAVLVDLEPGTMDAVRAGPFGQLFRPDNFVFGQSGAGNNWAKGHYTEGAELVDQVIDVVRREAEGCDCLQGFQITHSLGGGTGAGMGTLLISKIREEFPDRMMATFSVVPSPKVSDTVVEPYNATLSVHQLVEHSDETFCIDNEALYDICMRTLKLANPSYGDLNHLVSAVMSGVTTCLRFPGQLNSDLRKLAVNMVPFPRLHFFMVGFAPLTSRGAYSFRAITVPELTQQMYDPKNMMAASDFRNGRYLTCSAIFRGKVSMKEVEDQMRNVQNKNHTYFVEWIPNNIQTALCSIPPRGLPMASTFIGNSTSIQELFKRVGDQFTAMFRRKAFLHWYT…	8.66667	AVLVDLEPGTMDAVR-MMATFSVVPSPK-FPGQLNSDLR-LAVNMVPFPR-LHFFMVGFAPLTSR-VGDQFTAMFR-	#
20130513_tam109	tubulin beta chain [Neosartorya fischeri NRRL 181]	gi%7c119495802 gi%7c119412840	49826	237	52	6	0.15	MREIVHLQTGQCGNQIGAAFWQTISGEHGLDGSGHYNGSSDLQLERMNVYFNEANGDKYVPRAVLVDLEPGTMDAVRAGPFGELFRPDNFVFGQSGAGNNWAKGHYTEGAELVDQVIDVVRREAEGCDCLQGFQVTHSLGGGTGAGMGTLLISKIREEFPDRMMATFSVVPSPKVSDTVVEPYNATLSVHQLVEHSDETFCIDNEALYDICMRTLKLSNPSYGDLNHLVSAVMSGVTTCLRFPGQLNSDLRKLAVNMVPFPRLHFFMVGFAPLTSRGAHSFRAVSVPELTQQMFDPKNMMAASDFRNGRYLTCSAIFRGKVSMKEVEDQMRNIQSKNQSYFVEWIPNNIQTALCSIPPRGLKMSSTFIGNSTSIQELFKRVGDQFTAMFRRKAFLHWYT…	8.66667	AVLVDLEPGTMDAVR-MMATFSVVPSPK-FPGQLNSDLR-LAVNMVPFPR-LHFFMVGFAPLTSR-VGDQFTAMFR-	#
20130513_tam109	tubulin beta chain [Botryotinia fuckeliana B05.10]	gi%7c154323446	48841	237	52	6	0.16	MREIGNQIGAAFWQTISGEHGLDGSGVYNGTSDLQLERMNVYFNEASGNKYVPRAVLVDLEPGTMDAVRAGPFGQLFRPDNFVFGQSGAGNNWAKGHYTEGAELVDQVLDVVRREAEGCDCLQGFQITHSLGGGTGAGMGTLLISKIREEFPDRMMATFSVVPSPKVSDTVVEPYNATLSVHQLVENSDATFCIDNEALYDICMRTLKLSNPSYGDLNHLVSAVMSGVTTCLRFPGQLNSDLRKLAVNMVPFPRLHFFMVGFAPLTSRGAHSFRAVTVPELTQQMYDPKNMMAASDFRNGRYLTCSAIFRGKVSMKEVEDQMRNVQNKNSSYFVEWIPNNVQTALCSIPPRGLKMSSTFVGNSTSIQELFKRVGDQFTAMFRRKAFLHWYTGEGMDEME…	8.66667	AVLVDLEPGTMDAVR-MMATFSVVPSPK-FPGQLNSDLR-LAVNMVPFPR-LHFFMVGFAPLTSR-VGDQFTAMFR-	#
20130513_tam109	beta tubulin [Sclerotinia sclerotiorum 1980]	gi%7c156057841 gi%7c154702437	49761	237	52	6	0.15	MREIVHLQTGQCGNQIGAAFWQTISGEHGLDGSGVYNGTSDLQLERMNVYFNEASGNKYVPRAVLVDLEPGTMDAVRAGPFGQLFRPDNFVFGQSGAGNNWAKGHYTEGAELVDQVLDVVRREAEGCDCLQGFQITHSLGGGTGAGMGTLLISKIREEFPDRMMATFSVVPSPKVSDTVVEPYNATLSVHQLVENSDETFCIDNEALYDICMRTLKLSHPSYGDLNHLVSAVMSGVTTCLRFPGQLNSDLRKLAVNMVPFPRLHFFMVGFAPLTSRGAHSFRAVTVPELTQQMYDPKNMMAASDFRNGRYLTCSAIFRGKVSMKEVEDQMRNVQNKNSSYFVEWIPNNVQTALCSIPPRGLKMSSTFVGNSTSIQELFKRVGDQFTAMFRRKAFLHWYT…	8.66667	AVLVDLEPGTMDAVR-MMATFSVVPSPK-FPGQLNSDLR-LAVNMVPFPR-LHFFMVGFAPLTSR-VGDQFTAMFR-	#
20130513_tam109	beta-tubulin_ partial [Aspergillus fumigatus]	gi%7c15625248	44723	237	52	6	0.17	MREIVHLQTGQCGNQIGAAFWQTISGEHGLDGSGHYNGSSDLQLERMNVYFNEANGDKYVPRAVLVDLEPGTMDAVRAGPFGELFRPDNFVFGQSGAGNNWAKGHYTEGAELVDQVIDVVRREAEGCDCLQGFQVTHSLGGGTGAGMGTLLISKIREEFPDRMMATFSVVPSPKVSDTVVEPYNATLSVHQLVEHSDETFCIDNEALYDICMRTLKLSNPSYGDLNHLVSAVMSGVTTCLRFPGQLNSDLRKLAVNMVPFPRLHFFMVGFAPLTSRGAHSFRAVSVPELTQQMFDPKNMMAASDFRNGRYLTCSAIFRGKVSMKEVEDQMRNIQSKNQSYFVEWIPNNIQTALCSIPPRGLKMSSTFIGNSTSIQELFKRVGDQFTAMFRRKAFLHWYT…	8.66667	AVLVDLEPGTMDAVR-MMATFSVVPSPK-FPGQLNSDLR-LAVNMVPFPR-LHFFMVGFAPLTSR-VGDQFTAMFR-	#
20130513_tam109	beta tubulin [Venturia inaequalis]	gi%7c194400337	49719	237	52	6	0.15	MREIVHLQTGQCGNQIGAAFWQTISGEHGLDGSGVYNGTSDLQLERMNVYFNEASGNKFVPRAVLVDLEPGTMDAVRAGPFGQLFRPDNFVFGQSGAGNNWAKGHYTEGAELVDQVLDVVRREAEGCDCLQGFQITHSLGGGTGAGMGTLLISKIREEFPDRMMATFSVVPSPKVSDTVVEPYNATLSVHQLVENSDETFCIDNEALYDICMRTLKLNNPSYGDLNHLVSAVMSGVTTCLRFPGQLNSDLRKLAVNMVPFPRLHFFMVGFAPLTSRGAHSFRAVTVPELTQQMFDPKNMMAASDFRNGRYLTCSAIFRGKVSMKEVEDQMRNVQNKNSSYFVEWIPNNVQTALCSIPPRGLKMSSTFVGNSTSIQELFKRVGDQFTAMFRRKAFLHWYT…	8.66667	AVLVDLEPGTMDAVR-MMATFSVVPSPK-FPGQLNSDLR-LAVNMVPFPR-LHFFMVGFAPLTSR-VGDQFTAMFR-	#
20130513_tam109	tubulin beta_ putative [Penicillium marneffei ATCC 18224]	gi%7c212542525 gi%7c210066324	49710	237	52	6	0.15	MREIVHLQTGQCGNQIGAAFWQIISAEHGLDGSGVYNGSSDLQLERMNVYFNEASGNKYVPRAVLVDLEPGTMDAVRAGPFGQLFRPDNFVFGQSGAGNNWAKGHYTEGAELVDQVVDVVRREAEACDCLQGFQITHSLGGGTGAGMGTLLISKIREEFPDRMMATFSVVPSPKVSDTVVEPYNATLSVHQLVEHSDETFCIDNEALYDICTRTLKLSSPSYGDLNHLVSTVMSGVTTSLRFPGQLNSDLRKLAVNMVPFPRLHFFMVGFAPLTSRGSYSFRAVTVPELTQQMYDPKNMMAASDFRNGRYLTCSALFRGKVSMKEVEDQMRNVQNKNSSYFVEWIPNNVQTALCSVPPRGLKMAATFVGNSTAIQELFKRVGDQFTAMFRRKAFLHWYT…	8.66667	AVLVDLEPGTMDAVR-MMATFSVVPSPK-FPGQLNSDLR-LAVNMVPFPR-LHFFMVGFAPLTSR-VGDQFTAMFR-	#
20130513_tam109	tubulin beta chain [Ajellomyces capsulatus G186AR]	gi%7c225560022 gi%7c240276110 gi%7c325090025	50002	237	52	6	0.15	MREIVHLQTGQCGNQIGAAFWQTISGEHGLDGAGYYNGSSDIQLERMNVYFNEATEKKYVPRAVLVDLEPGTMDAVRAGPFGQLFRPDNFVFGQSGAGNNWAKGHYTEGAELVDQVIDVVRREAEGCDCLQGFQITHSLGGGTGAGMGTLLISKIREEFPDRMMATFSVVPSPKVSDTVVEPYNATLSIHQLVEHSDETFCIDNEALYDICMRTLKLSEPSYGDLNHLVSAVMSGVTTCLRFPGQLNSDLRKLAVNMVPFPRLHFFMVGFAPLTSRGAYSFRAVTVPELTQQMYDPKNMMAASDFRNGRYLTCSAIFRGKVSMKEVEDQMRNVQNKNHTYFVEWIPNNVQTALCSIPPRGLKMSSTFVGNSTSIQELFKRVGDQFTAMFRRKAFLHWYT…	8.66667	AVLVDLEPGTMDAVR-MMATFSVVPSPK-FPGQLNSDLR-LAVNMVPFPR-LHFFMVGFAPLTSR-VGDQFTAMFR-	#
20130513_tam109	beta-tubulin [Monilinia fructicola]	gi%7c30961877 gi%7c30961879 gi%7c296840662 gi%7c296840664 gi%7c296840666	44160	237	52	6	0.17	MREIVHLQTGQCGNQIGAAFWQTISGEHGLDGSGVYNGTSDLQLERMNVYFNEASGNKYVPRAVLVDLEPGTMDAVRAGPFGQLFRPDNFVFGQSGAGNNWAKGHYTEGAELVDQVLDVVRREAEGCDCLQGFQITHSLGGGTGAGMGTLLISKIREEFPDRMMATFSVVPSPKVSDTVVEPYNATLSVHQLVENSDETFCIDNEALYDICMRTLKLSNPSYGDLNHLVSAVMSGVTTCLRFPGQLNSDLRKLAVNMVPFPRLHFFMVGFAPLTSRGAHSFRAVTVPELTQQMYDPKNMMAASDFRNGRYLTCSAIFRGKVSMKEVEDQMRNVQNKNSSYFVEWIPNNVQTALCSIPPRGLKMSSTFVGNSTSIQELFKRVGDQFTAMFRRKAFLHWY	8.66667	AVLVDLEPGTMDAVR-MMATFSVVPSPK-FPGQLNSDLR-LAVNMVPFPR-LHFFMVGFAPLTSR-VGDQFTAMFR-	#
20130513_tam109	beta-tubulin [Blumeria graminis f. sp. hordei]	gi%7c31043651 gi%7c31043653 gi%7c31043655 gi%7c31043657 gi%7c31043661	49658	237	52	6	0.15	MREIVHLQTGQCGNQIGAAFWQTISGEHGLDGSGVYNGTSDLQLERMNVYFNEASGNKYVPRAVLVDLEPGTMDAVRAGPFGQLFRPDNFVFGQSGAGNNWAKGHYTEGAELVDQVLDVVRREAEGCDCLQGFQITHSLGGGTGAGMGTLLISKIREEFPDRMMATFSVVPSPKVSDTVVEPYNATLSVHQLVENSDETFCIDNEALYDICMRTLKLSNPSYGDLNHLVSAVMSGVTTCLRFPGQLNSDLRKLAVNMVPFPRLHFFMVGFAPLTSRGAHSFRAVTVPELTQQMFDPKNMMAASDFRNGRYLTCSAILRGKVSMKEVEDQMRNVQQKNVSYFVEWIPNNVQTALCSIPPRGLKMSSTFVGNSTSIQELFKRVGDQFTAMFRRKAFLHWYT…	8.66667	AVLVDLEPGTMDAVR-MMATFSVVPSPK-FPGQLNSDLR-LAVNMVPFPR-LHFFMVGFAPLTSR-VGDQFTAMFR-	#
20130513_tam109	beta-1 and beta-2 tubulin [Eurotium amstelodami]	gi%7c321155613	48210	237	52	6	0.16	IVHLQTGQCGNQIGAAFWQTISGEHGLDGSGVYNGSSDLQLERMNVYFNEASNNKYVPRAVLVDLEPGTMDAVRAGPFGQLFRPDNFVFGQSGAGNNWAKGHYTEGAELVDNVVDVVRREAEACDCLQGFQITHSLGGGTGAGMGTLLISKIREEFPDRMMATFSVVPSPKVSDTVVEPYNATLSVHQLVEHSDETFCIDNEALYDICMRTLKLSNPSYGDLNHLVSAVMSGVTTCLRFPGQLNSDLRKLAVNMVPFPRLHFFMVGFAPLTSRSSHGFRAVTVPELTQQMFDPKNMMAASDFRNGRYLTCSAIFRGKVSMKEVEDQMRNVQNKNQTYFVEWIPNNVQTALCSIPPRNLKMSSTFVGNSTSIQELFKRVGDQFTAMFRRKAFLHWYTGEG…	8.66667	AVLVDLEPGTMDAVR-MMATFSVVPSPK-FPGQLNSDLR-LAVNMVPFPR-LHFFMVGFAPLTSR-VGDQFTAMFR-	#
20130513_tam109	putative Tubulin beta chain [Glarea lozoyensis 74030]	gi%7c361131492	49806	237	52	6	0.15	MREIVHLQTGQCGNQIGAAFWQNISGEHGLDGQGVYNGTSDLQLERMNVYFNEASGNKYVPRAVLVDLEPGTMDAVRAGPFGQLFRPDNFVFGQSGAGNNWAKGHYTEGAELVDQVLDVVRREAEGCDCLQGFQITHSLGGGTGAGMGTLLISKIREEFPDRMMATFSVVPSPKVSDTVVEPYNATLSVHQLVENSDETFCIDNEALYDICMRTLKLSNPSYGDLNHLVSAVMSGVTTCLRFPGQLNSDLRKLAVNMVPFPRLHFFMVGFAPLTSRGAHSFRAVTVPELTQQMYDPKNMMAASDFRNGRYLTCSAIFRGKVSMKEVEDQMRNVQNKNSSYFVEWIPNNVQTALCSIPPRGLKMSSTFVGNSTSIQELFKRVGDQFTAMFRRKAFLHWYT…	8.66667	AVLVDLEPGTMDAVR-MMATFSVVPSPK-FPGQLNSDLR-LAVNMVPFPR-LHFFMVGFAPLTSR-VGDQFTAMFR-	#
20130513_tam109	tubulin beta chain [Exophiala dermatitidis NIH/UT8656]	gi%7c378729723	49990	237	52	6	0.15	MREIVHLQTGQCGNQIGAAFWQIISGEHGLDGNGVYNGTSDLQLERMNVYFNEASGNKYVPRAVLVDLEPGTMDAVRAGPFGQLFRPDNFVFGQSGAGNNWAKGHYTEGAELVDQVLDVVRREAESCDCLQGFQITHSLGGGTGAGMGTLLISKIREEFPDRMMATFSVVPSPKVSDTVVEPYNATLSVHQLVENSDETFCIDNEALYDICMRTLKLANPSYGDLNHLVSAVMSGVTTCLRFPGQLNSDLRKLAVNMVPFPRLHFFMVGFAPLTSRGAYSFRAITVPELTQQMFDPKNMMAASDFRNGRYLTCSAIFRGKVSMKEVEDQMRNVQNKNSSYFVEWIPNNVQTALCSIPPRGLKMSSTFVGNSTSIQELFKRVGDQFTAMFRRKAFLHWYT…	8.66667	AVLVDLEPGTMDAVR-MMATFSVVPSPK-FPGQLNSDLR-LAVNMVPFPR-LHFFMVGFAPLTSR-VGDQFTAMFR-	#
20130513_tam109	beta-tubulin [Phaeosphaeria avenaria f. sp. tritici]	gi%7c55583720	49730	237	52	6	0.15	MREIVHLQTGQCGNQIGAAFWQTISGEHGLDGSGVYNGTSDLQLERMNVYFNEASGNKFVPRAVLVDLEPGTMDAVRAGPFGQLFRPDNFVFGQSGAGNNWAKGHYTEGAELVDQVLDVVRREAEGCDCLQGFQITHSLGGGTGAGMGTLLISKIREEFPDRMMATFSVVPSPKVSDTVVEPYNATLSVHQLVENSDETFCIDNEALYDICMRTLKLNNPSYGDLNHLVSAVMSGVTTCLRFPGQLNSDLRKLAVNMVPFPRLHFFMVGFAPLTSRGANSFRAVSVPELTQQMFDPKNMMAASDFRNGRYLTCSAYFRGKVSMKEVEDQMRNVQNKNSSYFVEWIPNNVQTALCSVPPRGLKMSATFVGNSTSIQELFKRVGDQFTAMFRRKAFLHWYT…	8.66667	AVLVDLEPGTMDAVR-MMATFSVVPSPK-FPGQLNSDLR-LAVNMVPFPR-LHFFMVGFAPLTSR-VGDQFTAMFR-	#
20130513_tam109	beta-tubulin [Phoma nigrificans]	gi%7c55982586	43154	237	52	6	0.18	GNQIGAAFWQTISGEHGLDGSGVYNGTSDLQLERMNVYFNEASGNKFVPRAVLVDLEPGTMDAVRAGPFGQLFRPDNFVFGQSGAGNNWAKGHYTEGAELVDQVLDVVRREAEGCDCLQGFQITHSLGGGTGAGMGTLLISKIREEFPDRMMATFSVVPSPKVSDTVVEPYNATLSIHQLVENSDETFCIDNEALYDICMRTLKLNNPSYGDLNHLVSAVMSGVTTCLRFPGQLNSDLRKLAVNMVPFPRLHFFMVGFAPLTSRGAHSFRAVTVPELTQQMFDPKNMMAASDFRNGRYLTCSAYFRGKVSMKEVEDQMRNVQDKNSSYFVEWIPNNVQTALCSVPPRGLKMSSTFVGNSTSIQELFKRVGDQFTAMFRRKAFLHWYTGEG	8.66667	AVLVDLEPGTMDAVR-MMATFSVVPSPK-FPGQLNSDLR-LAVNMVPFPR-LHFFMVGFAPLTSR-VGDQFTAMFR-	#
20130513_tam109	beta-tubulin [Penicillium paxilli]	gi%7c56799460	49963	237	52	6	0.15	MREIVHLQTGQCGNQIGAAFWQTIAGEHGLDGDGHYNGNSDLQLERMNVYFTHASGDKYVPRAVLVDLEPGTMDAVRAGPFGKLFRPDNFVFGQSGAGNNWAKGHYTEGAELVDQVVDVVRREAEACDCLQGFQITHSLGGGTGAGMGTLLISKIREEFPDRMMATFSVVPSPKVSDTVVEPYNATLSVHQLVEHSDETFCIDNEALYDICMRTLKLSQPSYGDLNHLVSAVMSGVTTSLRFPGQLNSDLRKLAVNMVPFPRLHFFMVGFAPLTSRNANAYRQVSVPELTQQMFDPKNMMAASDFRNGRYLTCSALFRGKVSMKEVEDQMRAIQTKNQSYFVEWIPNNVQTALCSVPPRGLRMSSTFVGNSTSIQELFKRVGDQFTAMFRRKAFLHWYT…	8.66667	AVLVDLEPGTMDAVR-MMATFSVVPSPK-FPGQLNSDLR-LAVNMVPFPR-LHFFMVGFAPLTSR-VGDQFTAMFR-	#
20130513_tam109	tubulin beta [Aspergillus fumigatus Af293]	gi%7c70995400 gi%7c66850091 gi%7c159131211	51761	237	52	6	0.15	MREIVHLQTGQCGNQIGAAFWQTISGEHGLDGSGHGGNTENKEEADACLMGNNSYNGSSDLQLERMNVYFNEANGDKYVPRAVLVDLEPGTMDAVRAGPFGELFRPDNFVFGQSGAGNNWAKGHYTEGAELVDQVIDVVRREAEGCDCLQGFQVTHSLGGGTGAGMGTLLISKIREEFPDRMMATFSVVPSPKVSDTVVEPYNATLSVHQLVEHSDETFCIDNEALYDICMRTLKLSNPSYGDLNHLVSAVMSGVTTCLRFPGQLNSDLRKLAVNMVPFPRLHFFMVGFAPLTSRGAHSFRAVSVPELTQQMFDPKNMMAASDFRNGRYLTCSAIFRGKVSMKEVEDQMRNIQSKNQSYFVEWIPNNIQTALCSIPPRGLKMSSTFIGNSTSIQELFKR…	8.66667	AVLVDLEPGTMDAVR-MMATFSVVPSPK-FPGQLNSDLR-LAVNMVPFPR-LHFFMVGFAPLTSR-VGDQFTAMFR-	#
20130513_tam109	beta-tubulin [Leptosphaeria maculans]	gi%7c7673696	49769	237	52	6	0.15	MREIVHLQTGQCGNQIGAAFWQTISGEHGLDGSGVYNGTSDLQLERMNVYFNEASGNKFVPRAVLVDLEPGTMDAVRAGPFGQLFRPDNFVFGQSGAGNNWAKGHYTEGAELVDQVLDVVRREAEGCDCLQGFQITHSLGGGTGAGMGTLLISKIREEFPDRMMATFSVVPSPKVSDTVVEPYNATLSVHQLVENSDETFCIDNEALYDICMRTLKLNNPSYGDLNHLVSAVMSGVTTCLRFPGQLNSDLRKLAVNMVPFPRLHFFMVGFAPLTSRGAHSFRAVTVPELTQQMFDPKNMMAASDFRNGRYLTCSAYFRGKVSMKEVEDQMRNVQNKNSSYFVEWIPNNVQTALCSVPPRGLKMSSTFVGNSTSIQELFKRVGDQFTAMFRRKAFLHWYT…	8.66667	AVLVDLEPGTMDAVR-MMATFSVVPSPK-FPGQLNSDLR-LAVNMVPFPR-LHFFMVGFAPLTSR-VGDQFTAMFR-	#
20130513_tam109	translation elongation factor EF-1 alpha subunit _ putative [Aspergillus clavatus NRRL 1]	gi%7c121702563 gi%7c119397689	49995	232	45	6	0.13	MGKEDKAHINIVVIGHVDSGKSTTTGHLIYKCGGIDQRTIEKFEKEAAELGKGSFKYAWVLDKLKSERERGITIDIALWKFQTPRYEVTVIDAPGHRDFIKNMITGTSQADCAILIIASGTGEFEAGISKDGQTREHALLAFTLGVKQLIVALNKMDTCKWSEDRYNEIVKETSNFIKKVGYNPKAVPFVPISGFNGDNMLEVSPNCPWYKGWEKETKAGKSSGKTLLEAIDAIETPVRPSNKPLRLPLQDVYKISGIGTVPVGRVETGIISPGMVVTFAPANVTTEVKSVEMHHQQLKEGVPGDNVGFNVKNVSVKEVRRGNVCGDSKNDPPMAAASFNAQVIVLNHPGQVGAGYAPVLDCHTAHIACKFSELLEKIDRRTGKSTENNPKFIKSGDAA…	7.5	STTTGHLIYK-GITIDIALWK-YEVTVIDAPGHR-EHALLAFTLGVK-LPLQDVYK-ISGIGTVPVGR-	#
20130513_tam109	elongation factor 2 [Aspergillus terreus NIH2624]	gi%7c115384290 gi%7c114196384	82568	209	25	6	0.07	MVNFTIEEIRSLMDRQANIRNMSVIAHVDHGKSTLSDSLVQRAGIISAAKAGETRFMDTRPDEQDRCITIKSTAISLYAQFPDEEDLKEIPQKVDGSEFLINLIDSPGHVDFSSEVTAALRVTDGALTETVLRQALTERIKPVLIINKVDRALLELQVSKEDLYQSFSRTIESVNVIIATYFDKVLGDCQVYPDRGTVAFGSGLHGWAFTVRQFAVKYAKKFGVDRKKMLERLWGDNYFNPKTKKWSKTGEADGKPLERAFNQFILDPIFKIFNAMICIHLPSPVTAQKYRAETLYEGPMDDDCAIGIRDCDAKAPLMLYVSKMVPTSDKGRFYAFGRVYSGTVRSGLKVRIQGPNYTPGKKEDLFIKNIQRTILMMGRFVEPIEDVPAGNIVGLVGVD…	4.16667	VNFTIEEIR-STLSDSLVQR-FYAFGR-FSVSPVVQR-ISDPVVSYR-GGGQIIPTAR-	#
20130513_tam109	elongation factor 2 [Aspergillus niger CBS 513.88]	gi%7c145232525 gi%7c134056623 gi%7c350634581	93589	209	25	6	0.06	MVNFTIEEIRGLMDRPANIRNMSVIAHVDHGKSTLSDSLVQRAGIISAAKAGEGRYMDTRPDEQDRGITIKSTAISLYAKFPDEEDLKEIPQKVDGSEFLINLIDSPGHVDFSSEVTAALRVTDGALVVVDCVSGVCVQTETVLRQALTERIKPVLIINKVDRALLELQVSKEDLYQSFSRTIESVNVIIATYFDKALGDVQVYAEKGTVAFGSGLHGWAFTVRQFAVKFAKKFGVDRKKMLERLWGDNYFNPATKKWTKTQPEVNGKPVERAFNMFVLDPIFKIFQTINNDKKDQIPTLLEKLEVKLSNDEKDLAGKQLLKAVMRKFLPAADAMLEMICIHLPSPVTAQKYRGETLYEGPSDDDCAVGIRDCDPKAPLMLYVSKMVPTSDKGRFYAFG…	4.16667	VNFTIEEIR-STLSDSLVQR-FYAFGR-FSVSPVVQR-ISDPVVSYR-GGGQIIPTAR-	#
20130513_tam109	molecular chaperone Hsp70 [Aspergillus clavatus NRRL 1]	gi%7c121702313 gi%7c119397564	69629	270	59	5	0.09	MAPAVGIDLGTTYSCVGVFRDDRIEIIANDQGNRTTPSFVAFTDTERLIGDAAKNQVAMNPHNTVFDAKRLIGRRFQDAEVQSDMKHWPFKVVDKGGKPIIEVEFKGEAKQFTPEEVSSMVLTKMRETAEAYLGGTVNNAVITVPAYFNDSQRQATKDSGLIAGLNVLRIINEPTAAAIAYGLDKKVEGERNVLIFDLGGGTFDVSLLTIEEGIFEVKATAGDTHLGGEDFDNRLVNHFVSEFKRKHKRDLTTNARALRRLRTACERAKRTLSSAAQTSIEIDSLFEGIDFYTSITRARFEELCQDLFRSTMEPVERVLRDAKIDKSSVHEIVLVGGSTRIPKIQRLVADFFNKEPNKSINPDEAVAYGAAVQAAILSGDTSSKSTNEILLLDVAPLSL…	11.8	IEIIANDQGNR-TTPSFVAFTDTER-DSGLIAGLNVLR-IINEPTAAAIAYGLDK-FELTGIPPAPR-	#
20130513_tam109	heat shock protein 82 [Aspergillus terreus NIH2624]	gi%7c115432960 gi%7c114189469	79755	186	38	5	0.08	MSSETFEFQAEISQLLSLIINTVYSNKEIFLRELISNASDALDKIRYESLSDPSKLDSGKDLRIDIIPNKEAKTLTIRDTGIGMTKADLINNLGTIARSGTKQFMEALSAGADVSMIGQFGVGFYSAYLVADRVTVVSKHNDDEQYVWESAAGGTFTLTQDTEGEQLGRGTKIVLHLKDEQTDYLNESRIKEVVRKHSEFISYPIYLHVLKETEKEVPDEEAEENKEEDEEKKPKVEEVDEEEEKKEKKTKTVKESKIEEEELNKTKPIWTRNPADITQEEYAAFYKSLSNDWEDHLAVKHFSVEGQLEFRAILYVPKRAPFDLFETKKTKNNIKLYVRRVFITDDATDLIPEWLGFIKGVVDSEDLPLNLSRETLQQNKIMKVIKKNIVKKTLELFTE…	7.6	ADLINNLGTIAR-APFDLFETK-GVVDSEDLPLNLSR-TLELFTEIAEDR-TGQFGWSANMER-	#
20130513_tam109	heat shock protein 90 [Aspergillus oryzae RIB40]	gi%7c169776601 gi%7c238503321 gi%7c83771502 gi%7c220691704 gi%7c391874472	79583	186	38	5	0.08	MSETFEFQAEISQLLSLIINTVYSNKEIFLRELISNASDALDKIRYESLSDPSKLDSGKDLRIDIIPNKEAKTLTIRDTGIGMTKADLINNLGTIARSGTKQFMEALSAGADISMIGQFGVGFYSAYLVADRVTVISKHNDDEQYVWESAAGGTFTLTQDTEGEPLGRGTKMILHLKDEQTDYLNESRIKEVVRKHSEFISYPIYLHVLKETEKEVPDEEEETKEEEGDEKKPKIEEVDEEEEKKEKKTKTVKESKIEEEELNKTKPIWTRNPADITQEEYAAFYKSLSNDWEDHLAVKHFSVEGQLEFRAILYIPKRAPFDLFETKKTKNNIKLYVRRVFITDDATDLIPEWLSFIKGVVDSEDLPLNLSRETLQQNKIMKVIKKNIVKKTLELFTEI…	7.6	ADLINNLGTIAR-APFDLFETK-GVVDSEDLPLNLSR-TLELFTEIAEDR-TGQFGWSANMER-	#
20130513_tam109	cell division control protein Cdc48 [Neosartorya fischeri NRRL 181]	gi%7c119482299 gi%7c119409332	90134	140	30	5	0.07	MSAEPDHAHDKKRVHLHDASGAEKKEELDTSTAILKKKKKPNSLIVTDAVNDDNSVIALSNNTMETLQLFRGDTVLVKGKKRKDTVLIVLADDDLDDGSARINRVVRHNLRVKHGDIITVHPCPDIKYAKRIAVLPIADTVEGLTGSLFDVYLAPYFREAYRPVKQGDLFTVRGGMRQVEFKVVEVDPPEYGIVAQDTIIHCEGEPIQREDEEGNLNEVGYDDIGGCRKQMAQIRELVELPLRHPQLFKSIGIKPPRGILMYGPPGTGKTLMARAVANETGAFFFLINGPEIMSKMAGESESNLRKAFEEAEKNSPAIIFIDEIDSIAPKREKTNGEVERRVVSQLLTLMDGMKARSNVVVMAATNRPNSIDPALRRFGRFDREVDIGIPDPTGRLEIL…	6	QGDLFTVR-GILMYGPPGTGK-EVAVVEVPNVR-GVLFYGPPGTGK-LDTLVYVPLPDQASR-	#
20130513_tam109	cell division control protein Cdc48 [Penicillium marneffei ATCC 18224]	gi%7c212529968 gi%7c210074539	90172	140	30	5	0.07	MSSEPDHVHHKQRVNLTDPSGAEKKEEMDTSTAILKKKKKPNSLIVTDAVNDDNSIIALSNNTMETLQLFRGDTVLVKGKKRKDTVLIVLADDDLDDGSARINRVVRHNLRVKHGDIITVHACPDIKYAKRIAVLPIADTVEGLTGSLFDVFLAPYFREAYRPVRQGDLFTVRGGMRQVEFKVVEVDPPEYGIVAQDTIIHCEGEPIQREDEEGNLNEVGYDDIGGCRKQMAQVRELVELPLRHPQLFKSIGIKPPRGILMYGPPGTGKTLMARAVANETGAFFFLINGPEIMSKMAGESESNLRKAFEEAEKNSPAIIFIDEIDSIAPKRDKTNGEVERRVVSQLLTLMDGMKARSNIVVMAATNRPNSIDPALRRFGRFDREVDIGIPDPTGRLEIL…	6	QGDLFTVR-GILMYGPPGTGK-EVAVVEVPNVR-GVLFYGPPGTGK-LDTLVYVPLPDQASR-	#
20130513_tam109	cell division control protein Cdc48 [Talaromyces stipitatus ATCC 10500]	gi%7c242761705 gi%7c218723428	90084	140	30	5	0.07	MSSEPDHVHSKQRVNLSDPSGADKKEELDTATAILKKKKKPNSLIVTDAVNDDNSIIALSNNTMETLQLFRGDTVLVKGKKRKDTVLIVLADDDLDDGSARINRVVRHNLRVKHGDIITVHPCPDIKYAKRIAVLPIADTVEGLTGSLFDVFLAPYFREAYRPVRQGDLFTVRGGMRQVEFKVVEVDPPEYGIVAQDTIVHCEGEPIQREDEEGNLNEVGYDDIGGCRKQMAQVRELVELPLRHPQLFKSIGIKPPRGILMYGPPGTGKTLMARAVANETGAFFFLINGPEIMSKMAGESESNLRKAFEEAEKNSPAIIFIDEIDSIAPKREKTNGEVERRVVSQLLTLMDGMKARSNIVVMAATNRPNSIDPALRRFGRFDREVDIGIPDPTGRLEIL…	6	QGDLFTVR-GILMYGPPGTGK-EVAVVEVPNVR-GVLFYGPPGTGK-LDTLVYVPLPDQASR-	#
20130513_tam109	hypothetical protein AN7254.2 [Aspergillus nidulans FGSC A4]	gi%7c67900534 gi%7c40741970	90682	140	30	5	0.07	MCCWGGSRSGTLNLCVNSRRVYVADASGAEKKEELDTSTAILKKKKKPNSLIVTDAVNDDNSTISLSNNTMDTLGLFRGDTVTVRGKKRKETVLIVLADDDLDDGSARINRVVRHNLRVKHGDIITVHPCPDIKYAKRIAVLPIADTVEGLTGSLFDVYLAPYFRDGYRPVKQGDLFTVRGGMRQVEFKVVEVDPPEFGIVAPDTIIHSEGEPIQREDEENNLNEVGYDDIGGCRKQMAQIRELVELPLRHPQLFKSIGIKPPRGILMYGPPGTGKTLMARAVANETGAFFFLINGPEIMSKMAGESESNLRKAFEEAEKNSPAIIFIDEIDSIAPKREKTNGEVERRVVSQLLTLMDGMKARSNVVVMAATNRPNSIDPALRRFGRFDREVDIGIPDP…	6	QGDLFTVR-GILMYGPPGTGK-EVAVVEVPNVR-GVLFYGPPGTGK-LDTLVYVPLPDQASR-	#
20130513_tam109	cell division control protein Cdc48 [Aspergillus fumigatus Af293]	gi%7c71002728 gi%7c28394450 gi%7c66853683 gi%7c159130099	90162	140	30	5	0.07	MSAEPDHAHDKKRVHLHDASGAEKKEELDTSTAILKKKKKPNSLIVTDAVNDDNSVIALSNNTMETLQLFRGDTVLVKGKKRKDTVLIVLADDDLDDGSARINRVVRHNLRVKHGDIITVHPCPDIKYAKRIAVLPIADTVEGLTGSLFDVYLAPYFREAYRPVKQGDLFTVRGGMRQVEFKVVEVDPPEYGIVAQDTIIHCEGEPIQREDEEGNLNEVGYDDIGGCRKQMAQIRELVELPLRHPQLFKSIGIKPPRGILMYGPPGTGKTLMARAVANETGAFFFLINGPEIMSKMAGESESNLRKAFEEAEKNSPAIIFIDEIDSIAPKREKTNGEVERRVVSQLLTLMDGMKARSNVVVMAATNRPNSIDPALRRFGRFDREVDIGIPDPTGRLEIL…	6	QGDLFTVR-GILMYGPPGTGK-EVAVVEVPNVR-GVLFYGPPGTGK-LDTLVYVPLPDQASR-	#
20130513_tam109	5-methyltetrahydropteroyltriglutamate--homocysteine S-methyltransferase [Neosartorya fischeri NRRL 181]	gi%7c119501066 gi%7c119415455	86852	164	18	5	0.05	MVQSAVLGFPRMGKLRDLKKATEAYWGGKISRDELLSEGKRLRAEHWKIQKDAGVDIIPSNDFAFYDQVLDHIQLFGVVPERYSKYNLDPLDEYFAMGRGLQKPASEGQPAIDVPSLEMVKWFDSNYHYVKPTLQENQVFKLAANPKPVAQFLEAKEAGIVTRPVILGPVSFLTLAKADRGQKIDPIDKINDLVPVYVDLLAQLKAAGVEDVQIDEPVLVFDLPAKSKAAFKPVYEKIGALGDKAPRIVLATYFGDIVHNIDVLPALHNLYGIHVDLVRNPEQLDSVISALGPKQVLSAGVVDGRNIWKTNFKAAIEKVEHAIQKLGKDRVIVSTSSSLLHVPHTLESEKNLDPEVREWFSFAVEKTHEVVVIAKAVTEGPAAVRDQLEANAKSVQARA…	3.6	VQSAVLGFPR-EWFSFAVEK-WSFPR-VFVEEAYPR-HIGPGVYDIHSPR-	#
20130513_tam109	cobalamin-independent methionine synthase MetH/D [Aspergillus fumigatus Af293]	gi%7c70994626 gi%7c66849724 gi%7c159124996	86840	164	18	5	0.05	MVQSAVLGFPRMGKLRDLKKATEAYWGGKISRDELLSEGKRLRAEHWKIQKDAGVDIIPSNDFAFYDQVLDHIQLFGVVPERYSKYNLDPLDEYFAMGRGLQKPASEGQPAIDVPSLEMVKWFDSNYHYVKPTLQENQVFKLASNPKPVAQFLEAKEAGIITRPVILGPVSFLTLAKADRGQKIDPIDKINDLVPVYVDLLAQLKAAGVEDVQIDEPVLVFDLPAKSKAAFKPVYEKIGALGDKAPRIVLATYFGDIVHNIDVLPALHNLHGIHVDLVRNPEQLDAVIAALGPKQVLSAGVVDGRNIWKTNFKAAIEKVEHAIQKLGKDRVIVSTSSSLLHVPHTLESEKNLDPEVREWFSFAVEKTHEVVVIAKAVTEGPAAVRDQLEANAKSVQARA…	3.6	VQSAVLGFPR-EWFSFAVEK-WSFPR-VFVEEAYPR-HIGPGVYDIHSPR-	#
20130513_tam109	sulfonate biosynthesis enzyme [Aspergillus niger CBS 513.88]	gi%7c317036842	36235	150	18	5	0.15	MFSTLSRVAPAPSRSILQHASPQIPKVATLTGASRALSSTPPSQKEVTLLQDKKNGFGFARSNPRPPKPRTKGVTEIRGPYYTVMGKRYLADVLETMGTHVDGLKFAGGSFSLFPEKPLRELTDLAHDYGVYVSTGGWAEHLLTHPDANAVFDKYLRKCKDLGFDVIELSSGFLSFPEDDWLRLVDKVHSYKLKAKPELGIQFGAGGDTPASGLEAIGTSDPAKLVNMGRKFLDAGVERLMIESEGITENVQSWRTDVVSKIMKELPPERVMFEAADPKVYNWYIREFGIDVNLFVDHSQIVQLSCLRHGIWGTADTWGKIVSFRPE	3.6	YLADVLETMGTHVDGLK-FLDAGVER-VYNWYIR-HGIWGTADTWGK-IVSFRPE-	#
20130513_tam109	sulfonate biosynthesis enzyme [Aspergillus kawachii IFO 4308]	gi%7c358372731	36288	150	18	5	0.15	MFSTLSRVAPAPSRSILQHASPQIPKVAVLTGASRALSSTPPSQKEVTLLQDKKNGFGFARSNPRPPKPRTKGVTEIRGPYYTVMGKRYLADVLETMGTHVDGLKFAGGSFSLFPEKPLRELIDLAHDYNVYVSTGGWAEHLLTHPDANAVFDKYLRKCKDLGFDVVELSSGFLSFPEDDWLRLVDKVHSYKLKAKPELGIQFGAGGDTPASGLEAIGTSDPAKLVNMGRKFLDAGVERLMIESEGITENVQSWRTDVVSKIMKELPPERVMFEAADPKVYNWYIREFGIDVNLFVDHSQIVQLSCLRHGIWGTADTWGKIVSFRPE	3.6	YLADVLETMGTHVDGLK-FLDAGVER-VYNWYIR-HGIWGTADTWGK-IVSFRPE-	#
20130513_tam109	hypothetical protein TREMEDRAFT_45883 [Tremella mesenterica DSM 1558]	gi%7c392572883	131164	137	8	5	0.03	MAEAPSAIASWVTHLGVDSTPGSPGSPAVPSIHNLRKRQAGHHGRLKKVLVANRGEIAIRVFRTAHELAMTTVAIYSYEDRMSAHRYKSDESYIIGKGLTPVAAYLAQDEIIRIALEHNVDMIHPGYGFLSENAEFAKKVEDAGIAFIGPRPETIDALGDKTKARTVAIKTGVPVVPGTDGPVESYELAADFIKQYGFPVIIKAAMGGGGRGMRVVRDQDSFKENFERAVSEAKSAFGDGTVFIERFLDRPRHIEVQLLADSQGNCVHLFERDCSVQRRHQKVVEIAPAPHLDESIRQGILDDALKLAHAVGYRNAGTAEFLVDQQGRHYFIEINPRIQVEHTITEEITGIDIVAAQIQIAAGVSLEQLGLTQEHIHRRGFAIQSRITTEDAAANFQPD…	1.6	SAFGDGTVFIER-HYFIEINPR-FLYEDPWDR-LLIGAIR-YGDLSVLPTR-	#
20130513_tam109	ADP_ATP carrier protein_ variant [Exophiala dermatitidis NIH/UT8656]	gi%7c378729274 gi%7c378729275	34518	222	90	4	0.15	MSGEVPQARKNVMGIPPFVIDFLMGGVSAAVSKTAAAPIERVKLLIQNQDEMIKAGRLDRRYNGIVECFSRTIKNEGVMSLWRGNTANVIRYFPTQALNFAFRDTYKSMFAFKKERDGYWKWMAGNLASGGAAGATSLLFVYSLDYARTRLANDAKSASKGGERQFNGLVDVYRKTLASDGIAGLYRGFGPSVLGIIVYRGLYFGMYDSIKPVLLVGPLEGNFLASFLLGWGVTTGAGIASYPLDTIRRRMMMTSGEAVKYKSSFDAARQIMAAEGIRSFFKGAGANILRGVAGAGVLSIYDQVQLLMFGKAYKGGSG	22.5	LLIQNQDEMIK-YFPTQALNFAFR-TLASDGIAGLYR-GFGPSVLGIIVYR-	#
20130513_tam109	woronin body major protein [Aspergillus terreus NIH2624]	gi%7c115400341 gi%7c114191425	53718	134	44	4	0.06	MEFERHSRRDAQRTANLDFDARVPIPFSVFPSSYRSDAVPETTLTATERVEGEVNLDRTSHVEREDTRTSARLPDPRVYGKEEVDIHIERDSRRPLPQHDQQFAYSQERVQSARYPEVDLARERYREPSVRVHDRQQVYDQALESQLDVTEREYRRRVNQPTYDVNTYDRSYQAPVEYASARQYTADVYGSPKADLDVSYDRAYQPQPVEAYRGSAPRSLNVEPVSPATSNVKVLKTSTVVDQPPARKMGYYDDDGNYHSFRRGVERAADRILHPFDHQHHHHHHSDREEVVVADERGPVRYRDGVREDVRIVEPRGGATAETVPIPCHFVRIGDILILQGRPCQVIRISVSPQTGQHRYLGVDLFTRQLQEESSFVSNPSPSVVVQTMLGPVYKTYRI…	11	YLGVDLFTR-ILDLR-ALVINDGGR-ELVVDYK-	#
20130513_tam109	unnamed protein product [Aspergillus niger]	gi%7c134076014	24108	134	44	4	0.13	MGYYDDDGNYHSFRRGVERAADRIMHPHGHHDRQDVVVADEGGPVRFRGGVREDVRIVEPRAGGSSSTAETVPIPCHFIRIGDILILQGRPCQVIRISVSPQTGQHRYLGVDLFTRELQEESSFVSNPSPSVVVQTMLGPVYKTYRILDLRDDGRLVAMTETGDVKQGLPVVPQGHLFRRIREAFEDGRGSVRALVINDGGRELVVDYKVVHASRL	11	YLGVDLFTR-ILDLR-ALVINDGGR-ELVVDYK-	#
20130513_tam109	eukaryotic initiation factor 4A [Aspergillus terreus NIH2624]	gi%7c115384944 gi%7c114196711	47306	174	43	4	0.08	MADKGLEDLPEGTYWTSSLKSRLFGRLLAPSWWVGMIESNYEDVTDSFDSMELKAELLRGVYAYGFERPSAIQQRAIMPIIKGNDVIAQAQSGTGKTATFSISALQKIDPNLKACQALIVAPTRELAQQIQKVVVAIGDFMNINCHACIGGTAIRDDMKALQEGPPIVVGTPGRIQDMIQRRVLKTDQMKLFILDEADEMLSRGFTEQIYDIFQLLPQATQVVLLSATMPQDVLEVTTKFMRDPVRILVKKQELTLEGIKQFYIAVEKEEWKLDTLSDLYETVTITQAVIFCNTRRKVDWLTDKLTARDFTVSAMHGDMEQSQRDIIMKEFRSGSSRVLIATDLLARGIDVQQVSLVINYDLPANRENYIHRIGRGGRFGRKGVAINFVTADDVRMMRE…	10.75	LFILDEADEMLSR-VLIATDLLAR-KGVAINFVTADDVR-GVAINFVTADDVR-	#
20130513_tam109	eukaryotic translation initiation factor 4_ putative [Aspergillus clavatus NRRL 1]	gi%7c121705144 gi%7c134034143 gi%7c119398981	44903	174	43	4	0.09	MASNDKGLEEIPEGQIESNYDEITDSFDSMDLKPELLRGIYAYGFERPSAIQQRAIMPIIKGSDVIAQAQSGTGKTATFSISALQKIDPNLKACQALILAPTRELAQQIQKVVVAIGDFMSLECHACIGGTNVREDMKALQDGPQVVVGTPGRVQDMIQRRVLRTDQMKLFILDEADEMLSRGFTEQIYDIFQLLPQSTQVVLLSATMPQDVLEVTTKFMRDPVRILVKKQELTLEGIKQFYIAVEKEEWKLDTLSDLYETVTITQAVIFCNTRRKVDWLTDKLTARDFTVSAMHGDMEQSQRDVIMKEFRSGSSRVLIATDLLARGIDVQQVSLVINYDLPANRENYIHRIGRGGRFGRKGVAINFVTADDVRMMREIEQFYSTQIEEMPMNVADLI	10.75	LFILDEADEMLSR-VLIATDLLAR-KGVAINFVTADDVR-GVAINFVTADDVR-	#
20130513_tam109	ATP-dependent RNA helicase eIF4A [Aspergillus niger CBS 513.88]	gi%7c145233847 gi%7c134034144 gi%7c134057232 gi%7c350635036	44876	174	43	4	0.09	MASNDKGLEEIPEGQIETNYDEVTDSFDSMDLKPELLRGVYAYGFERPSAIQQRAIKPIIAGHDVIAQAQSGTGKTATFSISALQKIDQELKACQALIVAPTRELAQQIQKVVVAIGDFMNIECHACIGGTNVRDDMNALRAGPQVVVGTPGRIHDMIERRVLKTDQMKLFILDEADEMLSRGFTEQIYDIFQLLPQSTQVTLLSATMPQDVLEVTTKFMRDPIRILVKKQELTLEGIKQFYIAVEKEEWKLDTLSDLYETVTITQAVIFCNTRRKVDWLTDKLTARDFTVSAMHGDMEQGQRDVIMKEFRSGSSRVLIATDLLARGIDVQQVSLVINYDLPANRENYIHRIGRGGRFGRKGVAINFVTADDVRMMREIEQFYSTQIEEMPMNVADLI	10.75	LFILDEADEMLSR-VLIATDLLAR-KGVAINFVTADDVR-GVAINFVTADDVR-	#
20130513_tam109	Pc20g06740 [Penicillium chrysogenum Wisconsin 54-1255]	gi%7c255944863 gi%7c211587934	44427	174	43	4	0.09	MADKGLEDLAEGQIESNYDEVTDSFDSMDLKPELLRGVYAYGFERPSAIQQRAIMPIIKGNDVIAQAQSGTGKTATFSISALQKIDPEVKACQALILAPTRELAQQIQKVVVAIGDFMSLDCHACIGGTNVREDMNALRAGPQVVVGTPGRVHDMIQRRVLSTTAMKLFILDEADEMLSRGFTEQIYDIFQLLPQSTQVTLLSATMPQDVLEVTTKFMRDPVRILVKKQELTLEGIKQFYIAVEKEEWKLDTLSDLYETVTITQAVIFCNTRRKVDWLTDKLTARDFTVSAMHGDMEQGQRDVIMKEFRSGSSRVLIATDLLARGIDVQQVSLVINYDLPANRENYIHRIGRGGRFGRKGVAINFVTADDVRMLREIEQFYSTQVEEMPMNVADLI	10.75	LFILDEADEMLSR-VLIATDLLAR-KGVAINFVTADDVR-GVAINFVTADDVR-	#
20130513_tam109	malate dehydrogenase_ NAD-dependent [Neosartorya fischeri NRRL 181]	gi%7c119482986 gi%7c119409676	35832	244	42	4	0.16	MFAARQSFNLLQKRAFSASASQASKVAVLGAAGGIGQPLSLLLKLNPRVSELALYDIRGGPGVAADLSHINTNSTVTGYDPTPSGLRDALKGSEIVLIPAGVPRKPGMTRDDLFNTNASIVRDLAKAAADASPEANILVISNPVNSTVPIVAEVFKSKGVYNPKRLFGVTTLDVVRASRFISQIKKTDPAKEAVPVVGGHSGVTIVPLLSQSNHPDIEGETRDALVNRIQFGGDEVVKAKDGAGSATLSMAMAGARFAESLLKAAQGEKGVIEPTFVESPLYKDQGVDFFASRVELGPNGVEKILEVGKVNAYEEKLIQAALTDLKKNIQKGRDFVAQNP	10.5	VAVLGAAGGIGQPLSLLLK-GSEIVLIPAGVPR-DDLFNTNASIVR-LFGVTTLDVVR-	#
20130513_tam109	malate dehydrogenase_ NAD-dependent [Aspergillus clavatus NRRL 1]	gi%7c121711589 gi%7c119401561	35678	244	42	4	0.16	MFAARSFNLLQKRAFSASASQASKVAVLGAAGGIGQPLSLLLKLNPRVSELALYDIRGGPGVAADLSHINTNSTVTGYNPTPEGLRDCLKGSEIVLIPAGVPRKPGMTRDDLFNTNASIVRDLAKAAAEASPEANILVISNPVNSTVPIVSEVFKAKGVYNPKRLFGVTTLDVVRASRFISQVKKTDPAGEAVPVVGGHSGVTIVPLLSQSNHSDIEGTTRDELVNRIQFGGDEVVKAKDGAGSATLSMAMAGARFAESLLKAAQGEKGVIEPTFVESPLYKDQGVDFFASRVELGPNGVEKIHEVGKVNAYEEKLIEAALADLKKNIQKGIDFVKANP	10.5	VAVLGAAGGIGQPLSLLLK-GSEIVLIPAGVPR-DDLFNTNASIVR-LFGVTTLDVVR-	#
20130513_tam109	hypothetical protein SMAC_08400 [Sordaria macrospora k-hell]	gi%7c336260248 gi%7c380087681	35344	244	42	4	0.16	MFAPRIQTRAFSASARQLSKVAVLGAAGGIGQPLSLLLKLNPRVTELALYDIRGAPGVGADLSHINTKSTVKGYEPTASGLADALKGSEIVLIPAGVPRKPGMTRDDLFNTNASIVRDLAKACAESCPEANILVISNPVNSTVPIVSEIFKKAGVYNPKRLFGVTTLDVVRASRFVAEIKNTDPKNENITVVGGHSGVTIVPLFSQSNHPDLSSNDQLVHRVQFGGDEVVKAKDGAGSATLSMAMAGARMAESLLRAAQGEKGVTEPTFVESPLYKDQGIDFFSSKVELGPNGVEKILPVGPVDEIEQKLIDACLVDLKKNIQKGKDFVAANPGK	10.5	VAVLGAAGGIGQPLSLLLK-GSEIVLIPAGVPR-DDLFNTNASIVR-LFGVTTLDVVR-	#
20130513_tam109	malate dehydrogenase_ NAD-dependent [Aspergillus fumigatus Af293]	gi%7c70986899 gi%7c66846566 gi%7c159123295	35876	244	42	4	0.16	MFAARQSFNLLQKRAFSASASQASKVAVLGAAGGIGQPLSLLLKLNPRVSELALYDIRGGPGVAADLSHINTNSTVTGYDPTPSGLRDALKGSEIVLIPAGVPRKPGMTRDDLFNTNASIVRDLAKAAAEASPEANILVISNPVNSTVPIVAEVFKSKGVYNPKRLFGVTTLDVVRASRFISQIKKTDPAKEAVPVVGGHSGVTIVPLLSQSNHPDIEGETRDTLVNRIQFGGDEVVKAKDGAGSATLSMAMAGARFAESLLKAAQGEKGVIEPTFVESPLYKDQGVDFFASRVELGPNGVEKILEVGKVNAYEEKLIQAALTDLKKNIQKGRDFVAQNP	10.5	VAVLGAAGGIGQPLSLLLK-GSEIVLIPAGVPR-DDLFNTNASIVR-LFGVTTLDVVR-	#
20130513_tam109	heat shock protein SSC1_ mitochondrial precursor [Aspergillus terreus NIH2624]	gi%7c115395942 gi%7c114193179	72529	227	26	4	0.08	MLPSRLSRALPRTAQFARAPAFRVPGAAFRRWNSTEGGEEKVKGQVIGIDLGTTNSAVAVMEGKAPKIIENAEGARTTPSVVAFAEDGERLVGIAAKRQAVVNPENTLFATKRLIGRKFTDPEVQRDIKEVPYKIVQHTNGDAWVEARGQKYSPSQIGGFVLNKMKETAENYLGKPVKNAVVTVPAYFNDSQRQATKDAGQIAGLNVLRVVNEPTAAALAYGLEKEADRVVAVYDLGGGTFDISVLEIQKGVFEVKSTNGDTHLGGEDFDISLVRHIVQQFKKDSGLDLSNDRMAIQRIREAAEKAKIELSSSLQTEINLPFITADASGAKHINHKMTRANLESLVDPLISRTVEPVRKALKDANLQSSDIQDIILVGGMTRMPKVTESVKSMFGRDPA…	6.5	TTPSVVAFAEDGER-QAVVNPENTLFATK-DAGQIAGLNVLR-VVNEPTAAALAYGLEK-	#
20130513_tam109	hypothetical protein [Podospora anserina S mat+]	gi%7c171690628 gi%7c170945262	72862	227	26	4	0.08	MMSTRLSRALPRASTVAARAGMLRRTPAFAQRRYESTEEKVKGAVIGIDLGTTNSAVAIMEGKTPKIIENSEGARTTPSVVAFAEDGERLVGVAAKRQAVVNPENTLFATKRLIGRKFTDAEVQRDIKEVPYKIVQHTNGDAWVEARGQKYSPSQIGGFVLNKMKETAEAYLSKPVKNAVVTVPAYFNDSQRQATKDAGQIAGLNVLRVVNEPTAAALAYGLEKEADRVVAVYDLGGGTFDISVLEIQNGVFEVKSTNGDTHLGGEDFDISLVRHIVQQFKKDSNIDLTGDRMAIQRIREAAEKAKIELSSSLQTDINLPFITADASGPKHINIKLSRAQLESMMDPLIKRTVEPVRKALKDANLQAKDIQEVILVGGMTRMPKVAESVKSIFGRDPAK…	6.5	TTPSVVAFAEDGER-QAVVNPENTLFATK-DAGQIAGLNVLR-VVNEPTAAALAYGLEK-	#
20130513_tam109	predicted protein [Nectria haematococca mpVI 77-13-4]	gi%7c302895299 gi%7c256727457	73222	227	26	4	0.08	MLASRLSRALPRASPIVARSAAFARSPLASKFARYESTSSDGKVQGAVIGIDLGTTNSAVAIMEGKVPRIIENSEGARTTPSVVAFAEDGERLVGVAAKRQAVVNPENTLFATKRLIGRKFSDAEVQRDIKEVPYKIIQHSNGDAWVSARDKNYSPSQIGGFVLNKMKETAEAYLSKPIKNAVVTVPAYFNDSQRQSTKDAGQIAGLNVLRVVNEPTAAALAYGLEKETDSVVAVYDLGGGTFDISILEIQNGVFEVKSTNGDTHLGGEDFDIHLVRHMVQDFKKTSGLDLSGDRMAIQRIREAAEKAKIELSSSLSTDINLPFITADASGPKHINMKLTRAQLEKMVDPLISRTIEPVRKALKDAGLQAKEIQEVILVGGMTRMPKVGESVKSIFGRD…	6.5	TTPSVVAFAEDGER-QAVVNPENTLFATK-DAGQIAGLNVLR-VVNEPTAAALAYGLEK-	#
20130513_tam109	heat shock 70 kDa protein precursor [Metarhizium acridum CQMa 102]	gi%7c322701734	73112	227	26	4	0.08	MLASRLSRALPRAAPITARSAAFARPLAPRFARYESTAAGEGEKVQGSVIGIDLGTTNSAVAIMEGKVPRIIENSEGARTTPSVVAFAEDGERLVGVAAKRQAVVNPENTLFATKRLIGRKFTDAEVQRDIKEVPYKIVQHSNGDAWVSARGQNYSPSQIGGFVLNKMKETAEAYLSKPVKNAVVTVPAYFNDAQRQSTKDAGQIAGLNVLRVVNEPTAAALAYGLEKEADRVVAVYDLGGGTFDISILEIQNGVFEVKSTNGDTHLGGEDFDIHLVRHMVADFKKTSGIDLSSDRMAIQRIREAAEKAKIELSSSLQTDINLPFITADSSGPKHINMKLSRAQLEKMVDPLITRTIEPVRKALKDAGLQAKEIQEVILVGGMTRMPKVAESVKSIFGR…	6.5	TTPSVVAFAEDGER-QAVVNPENTLFATK-DAGQIAGLNVLR-VVNEPTAAALAYGLEK-	#
20130513_tam109	hypothetical protein SMAC_03781 [Sordaria macrospora k-hell]	gi%7c336265826	70130	227	26	4	0.08	MMSTRLTRALPKASIATRAAGMLRKPMTPAFARFESTGTDGKVTGAVIGIDLGTTNSAVAIMEGKVPRIIENSEGARTTPSVVAFAEDGERLVGVAAKRQAVVNPENTLFATKRLIGRKFTDAEVQRDIKEVPYKIVQHSNGDAWVEARGQKYSPSQVGGFVLNKMKETAEAFLSKPVKNAVVTVPAYFNDSQRQATKDAGQIAGLNVLRVVNEPTAAALAYGLEKEQDRIVAVYDLGGGTFDISVLEIQNGVFEVKSTNGDTHLGGEDFDIHLVRHLVQQFKKDSSIDLSGDRMAIQRIREAAEKAKIELSSSLQTDINLPFITADASGPKHINQKLTRAQLEAMVDPLIQRTIEPVRKALKDANLAAKDIQEVILVGGMTRMPKVAESVKAVLSGEV…	6.5	TTPSVVAFAEDGER-QAVVNPENTLFATK-DAGQIAGLNVLR-VVNEPTAAALAYGLEK-	#
20130513_tam109	hsp70 family protein_ mitochondrial precursor [Trichoderma reesei QM6a]	gi%7c340521673	73111	227	26	4	0.08	MLAARFSRALPRASPLAARSAAFARTPAVSKFARYESTAAEGNGKVQGAVIGIDLGTTNSAVAIMEGKTPRIIENAEGARTTPSVVAFAEDGERLVGVAAKRQAVVNPENTLFATKRLIGRKFSDAEVQRDIKEVPYKIVQHTNGDAWVSARGQNYSPSQIGGFILQKMKETAEAYLAKPVKNAVVTVPAYFNDAQRQSTKDAGQIAGLNVLRVVNEPTAAALAYGLEKEADRVVAVYDLGGGTFDISILEIQNGVFEVKSTNGDTHLGGEDFDIHLVRHMVSEFKKTSGIDLSGDRMAIQRIREAAEKAKIELSSSLQTDINLPFITADASGPKHINLKLTRSQLEKMVEPLINRTIEPVRKALKDANLQAKDIQEVILVGGMTRMPKVAESVKSIFG…	6.5	TTPSVVAFAEDGER-QAVVNPENTLFATK-DAGQIAGLNVLR-VVNEPTAAALAYGLEK-	#
20130513_tam109	putative heat shock protein [Chaetomium thermophilum var. thermophilum DSM 1495]	gi%7c340960334	72068	227	26	4	0.08	MMATRLSRALPRATSVAARSAVLRRAPAFARFESTDEKVKGTVIGIDLGTTNSAVAVMEGKIPRIIENAEGARTTPSVVAFAEDGERLVGVAAKRQAVVNPENTLFATKRLIGRKFTDPEVQRDIKEVPYKIVQHTNGDAWVEARGQKYSPSQIGGFILQKMKETAEAYLGKPVKNAVVTVPAYFNDSQRQATKDAGQIAGLNVLRVVNEPTAAALAYGLEKETDKVVAVYDLGGGTFDISVLEIQNGVFEVKSTNGDTHLGGEDFDIHLVRHLVGQFKKETGIDLTNDRMAIQRIREAAEKAKIELSSSLQTDINLPFITADASGPKHINTKITRAQLEAMVDPLIKKTVEPVRKALKDANLQAKDIQEVILVGGMTRMPKVAESVREIFGREPAKAV…	6.5	TTPSVVAFAEDGER-QAVVNPENTLFATK-DAGQIAGLNVLR-VVNEPTAAALAYGLEK-	#
20130513_tam109	hypothetical protein FOXB_05236 [Fusarium oxysporum Fo5176]	gi%7c342883857	73180	227	26	4	0.08	MLASRLSRALPRASPLAARSAAFTRSPLAAKFARYESTESEGKVQGAVIGIDLGTTNSAVAIMEGKVPRIIENSEGARTTPSVVAFAEDGERLVGVAAKRQAVVNPENTLFATKRLIGRKFKDAEVQRDIKEVPYKIVQHTNGDAWVAARGQNYSPSQIGGFVLNKMKETAEAYLSKPIKNAVVTVPAYFNDSQRQSTKDAGQIAGLNVLRVVNEPTAAALAYGLEKEADRVVAVYDLGGGTFDISILEIQNGVFEVKSTNGDTHLGGEDFDIHLVRHLVQDFKKTSGIDLSGDRMAIQRIREAAEKAKIELSSSLSTDINLPFITADSSGPKHINMKLSRAQLEKMVDPLITRTIEPVRKALKDAGLSAKEIQEVILVGGMTRMPKVAESVKSIFGRD…	6.5	TTPSVVAFAEDGER-QAVVNPENTLFATK-DAGQIAGLNVLR-VVNEPTAAALAYGLEK-	#
20130513_tam109	heat shock 70 kDa protein [Cordyceps militaris CM01]	gi%7c346321569	73784	227	26	4	0.08	MLASRLYRALPRATPLAARQGAFRAPLASRFARFESTASEGEQKVQGSVIGIDLGTTNSAVAIMEGKVPRIIENSEGARTTPSVVAFAEDGERLVGVAAKRQAVVNPENTLFATKRLIGRKFTDVEVQRDIKEVPYKIVQHSNGDAWVSARDQKYSPSQIGGFVLNKMKETAEAYLSKPIKNAVVTVPAYFNDAQRQSTKDAGQIAGLNVLRVVNEPTAAALAYGLEKEADRIVAVYDLGGGTFDISILEIQNGVFEVKSTNGDTHLGGEDFDIHLVRHMVADFKKTSGLDLSGDRMAIQRIREAAEKAKIELSSSLQTDINLPFITADASGPKHINMKLSRAQLEKMVDPLISRTIEPVRKALKDANLQAKEIQEVILVGGMTRMPKVAESVKGIFGR…	6.5	TTPSVVAFAEDGER-QAVVNPENTLFATK-DAGQIAGLNVLR-VVNEPTAAALAYGLEK-	#
20130513_tam109	unnamed protein product [Sordaria macrospora k-hell]	gi%7c380091217	72594	227	26	4	0.08	MMSTRLTRALPKASIATRAAGMLRKPMTPAFARFESTGTDGKVTGAVIGIDLGTTNSAVAIMEGKVPRIIENSEGARTTPSVVAFAEDGERLVGVAAKRQAVVNPENTLFATKRLIGRKFTDAEVQRDIKEVPYKIVQHSNGDAWVEARGQKYSPSQVGGFVLNKMKETAEAFLSKPVKNAVVTVPAYFNDSQRQATKDAGQIAGLNVLRVVNEPTAAALAYGLEKEQDRIVAVYDLGGGTFDISVLEIQNGVFEVKSTNGDTHLGGEDFDIHLVRHLVQQFKKDSSIDLSGDRMAIQRIREAAEKAKIELSSSLQTDINLPFITADASGPKHINQKLTRAQLEAMVDPLIQRTIEPVRKALKDANLAAKDIQEVILVGGMTRMPKVAESVKSIFGRDP…	6.5	TTPSVVAFAEDGER-QAVVNPENTLFATK-DAGQIAGLNVLR-VVNEPTAAALAYGLEK-	#
20130513_tam109	hsp70-like protein [Beauveria bassiana ARSEF 2860]	gi%7c400601918	73738	227	26	4	0.08	MLASRLYRALPRATPLAARQAAFRAPLASRFARFESTAASEGEQKVQGSVIGIDLGTTNSAVAIMEGKVPRIIENSEGARTTPSVVAFAEDGERLVGVAAKRQAVVNPENTLFATKRLIGRKFTDAEVQRDIKEVPYKIVQHSNGDAWVSARDQKYSPSQIGGFVLNKMKETAEAYLSKPIKNAVVTVPAYFNDAQRQSTKDAGQIAGLNVLRVVNEPTAAALAYGLEKEADRIVAVYDLGGGTFDISILEIQNGVFEVKSTNGDTHLGGEDFDIHLVRHLVADFKKTSGLDLSGDRMAIQRIREAAEKAKIELSSSLQTDINLPFITADASGPKHINMKLSRAQLEKMVDPLISRTIEPVRKALKDANLQAKEIQEVILVGGMTRMPKVAESVKGIFG…	6.5	TTPSVVAFAEDGER-QAVVNPENTLFATK-DAGQIAGLNVLR-VVNEPTAAALAYGLEK-	#
20130513_tam109	hypothetical protein FG06154.1 [Gibberella zeae PH-1]	gi%7c46123553	73026	227	26	4	0.08	MLASRLSRALPRASPLAARSAAFTRSPLASRFARYESTESDGKVQGAVIGIDLGTTNSAVAIMEGKVPRIIENAEGARTTPSVVAFAEDGERLVGVAAKRQAVVNPENTLFATKRLIGRKFKDAEVQRDIKEVPYKIVQHTNGDAWVAARGQNYSPSQIGGFVLNKMKETAEAYLSKPIKNAVVTVPAYFNDSQRQSTKDAGQIAGLNVLRVVNEPTAAALAYGLEKEADSIVAVYDLGGGTFDISILEIQNGVFEVKSTNGDTHLGGEDFDIHLVRHLVQDFKKTSGIDLSGDRMAIQRIREAAEKAKIELSSSLSTDINLPFITADSSGPKHINMKLSRAQLEKMVDPLISRTIEPVRKALKDAGLSAKEIQEVILVGGMTRMPKVAESVKGIFGRD…	6.5	TTPSVVAFAEDGER-QAVVNPENTLFATK-DAGQIAGLNVLR-VVNEPTAAALAYGLEK-	#
20130513_tam109	PREDICTED: uncharacterized protein LOC101044508 [Saimiri boliviensis boliviensis]	gi%7c403308699	147198	165	26	4	0.02	MARTKQTARKSTGGKAPRKQLATKAARKSAPATGGVKKPHRYRPGTVALREIRRYQKSTELLIRKLPFQRLVREIAQDFKTDLRFQSSAVMALQEACEAYLVGLFEDTNLCAIHAKRVTIMPKDIQLARRIRGERQHGLDVGQDAALRDGDLAQQLVELLVVADGQLQVARDDAGLLVVAGRVARQLQDLGRQVLQHRRQVDRRAGPDPLGVVALAEQAMHAAHGELEPGPGGSGLGLGAGFAALLAASRHDEETIREGRDAQARPQGELLRVRVQGTSPDTGISSRAVGILNTFMNDILGHIAGEAWRITPSARPSPPGRSRLLCACQAPCVQGHHGRHQVHQFQVSSSLVCPVGTPLVSLDVLQVIPQFSGLQLPGQQQAHGRLDLPGGDGRALVVM…	6.5	STELLIR-ISGLIYEETR-VFLENVIR-AGLQFPVGR-	#
20130513_tam109	hypothetical protein AN5800.2 [Aspergillus nidulans FGSC A4]	gi%7c67539260 gi%7c40739119 gi%7c259480047	20870	147	26	4	0.22	MGIDLDRHHVRSTHRKAPKSENVYLQVLVKLYRFLARRTESNFNKVVLRRLFMSRINRPPVSLSRIASNVTESHQGKTIVVIGTVTDDNRLLTVPKLSVAALRFTATARARIEKAGGETLTLDQLALRAPTGANTLLLRGPKNAREAVKHFGFGPHKHKKPYVRSKGRKFERARGRRRSRGFKV	6.5	INRPPVSLSR-LSVAALR-AGGETLTLDQLALR-APTGANTLLLR-	#
20130513_tam109	ATP-citrate synthase subunit 1 [Aspergillus terreus NIH2624]	gi%7c115388095 gi%7c114195637	71577	137	23	4	0.06	MPDSAPLLNTANGGSANDNITRFNPPSRVRSPQSHALFHNKTRCFVYGMQPRAVQGMLDFDFICKRSTPSVAGIIYTFGGQFVSKMYWGTSETLLPVYQDVSKAMAKHPDVDTVVNFASSRSVYSSTMELMQCPQIKAIAIIAEGVPERRAREIMVTAKEKGITIIGPATVGGIKPGAFKIGNTGGMMDNIVASKLYRKGSVGYVSKSGGMSNELNNIISQTTDGVYEGIAIGGDRYPGTTFIDHLLRYQAEPECKILVLLGEVGGVEEYRVIEAVKNGTITKPVVAWAIGTCASMFKTEVQFGHAGASANSDLETAVAKNKAMREAGIHVPETFEDLPQLLKEVYDEQVKKGVIKPQPEPAVPKIPIDYSWAQELGLIRKPAAFISTISDDRGQELLY…	5.75	AGKDLISALVSGLLTIGSR-DLISALVSGLLTIGSR-MGVLNGLFVLGR-SIGLIAHYLDQK-	#
20130513_tam109	ATP citrate lyase_ subunit 1_ putative [Neosartorya fischeri NRRL 181]	gi%7c119471597 gi%7c119406342	71916	137	23	4	0.06	MPSSAPLAGTANGTLNANDNITRFEPPSRVLSPLTHTLFHNKTRCFVYGMQPRAVQGMLDFDFICKRSTPSVAGIIYTFGGQFVSKMYWGTSETLLPVYQDAAKAMAKHPDVDTVVNFASSRSVYSSTMELMNYPQIKSIAIIAEGVPERRAREIMVIAKEKGITIIGPATVGGIKPGAFKIGNTGGMMDNIVASKLYRKGSVGYVSKSGGMSNELNNIISQTTDGVHEGIAIGGDRYPGTTFIDHLLRYQADPDCKILLLLGEVGGVEEYRVIEAVKNGTITKPLVAWAIGTCASMFKTEVQFGHAGASANSQLETAVYKNKAMREAGIHVPDTFEELPQLLKQVYEDQVKKGVIKPQPEPQVPKIPIDYSWAQELGLIRKPAAFISTITDDRGQELL…	5.75	AGKDLISALVSGLLTIGSR-DLISALVSGLLTIGSR-MGVLNGLFVLGR-SIGLIAHYLDQK-	#
20130513_tam109	ATP citrate lyase_ subunit 1_ putative [Aspergillus clavatus NRRL 1]	gi%7c121699808 gi%7c119396311	71786	137	23	4	0.06	MPITAPLASAANGGANANDNITRFDPPSRVRSPLTHSLFHNKTRCFVYGMQPRAVQGMLDFDFICKRTTPSVAGIIYTFGGQFVSKMYWGTSETLLPVYQDVAKAMAKHPDVDTVVNFASSRSVYSSTMELMQCPQIKSIAIIAEGVPERRAREIMVTAREKGITIIGPATVGGIKPGAFKIGNTGGMMDNIVASKLYRKGSVGYVSKSGGMSNELNNIIAQNTDGVHEGIAIGGDRYPGTTFIDHLLRYQADPECKILLLLGEVGGVEEYRVIEAVKNGTITKPIVAWAIGTCASMFKTEVQFGHAGASANSQLETAVNKNKAMREAGIYVPDTFEELPQLLKQVYDDQVKKGIIKPQPEPVVPKIPIDYSWAQELGLIRKPAAFISTITDDRGQELL…	5.75	AGKDLISALVSGLLTIGSR-DLISALVSGLLTIGSR-MGVLNGLFVLGR-SIGLIAHYLDQK-	#
20130513_tam109	hypothetical protein SS1G_02379 [Sclerotinia sclerotiorum 1980]	gi%7c156060481 gi%7c154699787	71305	137	23	4	0.06	MPSATESGAGNANDNIRRFTAPSRPLSPRAEHTLFHDKTRCFVYGLQPRAVQGMLDFDFICKRKTPSVAGIIYTFGGQFVSKMYWGTSETLLPVYQDVGKAMAKHEDVDTVVNFASSRSVYQSTMELLEYPQIKSIAIIAEGVPERRAREILHAAAKKGVTIIGPATVGGIKPGSFKIGNTGGMMDNIVASKLYRKGSVGYVSKSGGMSNELNNIIANTTDGVYEGVAIGGDRYPSTTFIDHLLRYQADPECKILVLLGEVGGVEEYRVIEAVKNGTITKPIVAWAIGTCASMFKTEVQFGHAGSFANSQLETAATKNKSMKEAGFHVPDTFEDMPAVLASVYEKLVADGTIVPQPEPIVPKIPIDYSWAQELGLIRKPAAFISTISDDRGQELLYAGM…	5.75	AGKDLISALVSGLLTIGSR-DLISALVSGLLTIGSR-MGVLNGLFVLGR-SIGLIAHYLDQK-	#
20130513_tam109	ATP citrate lyase_ subunit 1_ putative [Penicillium marneffei ATCC 18224]	gi%7c212530264 gi%7c210074687	71716	137	23	4	0.06	MPSIASSNGVQSANDNITRFNPPSRLLTPLEQHTLFHPKTRCFVYGMQPRAVQGMLDFDFICKRSTPSVAGIIYTFGGQFVSKMYWGTSETLLPVYQDVEKAFAKHSDVDTVVNFASSRSVYSSTMELMELPQVRTIAIIAEGVPERRAREIMVVAKEKGITIIGPATVGGIKPGAFKIGNTGGMMDNIVASKLYRKGSVGYVSKSGGMSNELNNIVCQNADGVHEGVAIGGDRYPGTTFIDHLLRYQADPDCKILLLLGEVGGVEEYRVIEAVKNGIITKPIVAWAIGTCASMFKTEVQFGHAGASANSQLETAVEKNKHMRAAGFYVPDTFEELPQVLNNLYKKLVADGTIATFKEPVIPKIPMDYSWAQELGLIRKPAAFISTISDDRGQELLYAG…	5.75	AGKDLISALVSGLLTIGSR-DLISALVSGLLTIGSR-MGVLNGLFVLGR-SIGLIAHYLDQK-	#
20130513_tam109	ATP citrate lyase_ subunit 1_ putative [Talaromyces stipitatus ATCC 10500]	gi%7c242819170 gi%7c218713727	71721	137	23	4	0.06	MPSLAPSNGVQSANDNITRFNPPSRLRSPLEQHTLFHPKTRCFVYGMQPRAVQGMLDFDFICKRSTPSVAGIIYTFGGQFVSKMYWGTSETLLPVYQDVEKAFAKHSDVDTVVNFASSRSVYSSTMELMEIPQVRTIAIIAEGVPERRAREIMVVAKEKGITIIGPATVGGIKPGAFKIGNTGGMMDNIVASKLYRKGSVGYVSKSGGMSNELNNIICQNADGVHEGVAIGGDRYPGTTFIDHLLRYQADPECKILLLLGEVGGVEEYRVIEAVKNGTITKPIVAWAIGTCASMFKTEVQFGHAGASANSQLETAVEKNKHMRAAGFYVPDTFEELPQVLNDLYKKLVADGTIATFKEPVIPKIPMDYSWAQELGLIRKPAAFISTISDDRGQELLYAG…	5.75	AGKDLISALVSGLLTIGSR-DLISALVSGLLTIGSR-MGVLNGLFVLGR-SIGLIAHYLDQK-	#
20130513_tam109	ATP-citrate synthase subunit 1 [Grosmannia clavigera kw1407]	gi%7c320586931	72096	137	23	4	0.06	MPAATVTPANGSKTPVGLSANDKITRFAAPSRPLSPLPSHALFNNKTRCLVYGLQPRAVQGMLDFDFICKRPTPSVAGIVYTFGGQFVSKMYWGTSETLLPVYQEVSKAVEKHPDVDVVVNFASSRSVYSSTLELMEYSQIKTIAIIAEGVPERRAREIAHIANKKGITIIGPATVGGIKPGCFKIGNTGGMMDNIVASKLYRKGSVGYVSKSGGMSNELNNIIAQNTDGVYEGVAIGGDRYPGTTFIDHMLRYQADPDCKILVLLGEVGGVEEYKVIDAVKQGIITKPIVAWAIGTCASMFKTEVQFGHAGSFANSQLETAAMKNKQMRDAGFFVPTTFEDMPTVLKSVYEKLVKDGTIHPSAEPAVPKIPIDYSWAQELGLIRKPAAFISTISDDRG…	5.75	AGKDLISALVSGLLTIGSR-DLISALVSGLLTIGSR-MGVLNGLFVLGR-SIGLIAHYLDQK-	#
20130513_tam109	CND6_ similar to ATP-citrate synthase subunit [Botryotinia fuckeliana]	gi%7c347839840	71400	137	23	4	0.06	MPSATASGAQGNANDNIRRFAAPSRPLSPRAEHTLFHDKTRCFVYGLQPRAVQGMLDFDFICKRKTPSVAGIIYTFGGQFVSKMYWGTSETLLPVYQDVEKAMAKHEDVDTVVNFASSRSVYQSTMELLQYPQIKSIAIIAEGVPERRAREILHAAAKKGVTIIGPATVGGIKPGSFKIGNTGGMMDNIVASKLYRKGSVGYVSKSGGMSNELNNIIANTTDGVYEGVAIGGDRYPSTTFIDHLLRYQADPECKILVLLGEVGGVEEYRVIEAVKNGTITKPIVAWAIGTCASMFKTEVQFGHAGSFANSQLETAATKNKSMRDAGFHVPDTFEDMPAVLASVYEKLVAAGTIVPQPEPIVPKIPIDYSWAQELGLIRKPAAFISTISDDRGQELLYAG…	5.75	AGKDLISALVSGLLTIGSR-DLISALVSGLLTIGSR-MGVLNGLFVLGR-SIGLIAHYLDQK-	#
20130513_tam109	ATP-citrate synthase subunit 1 [Magnaporthe oryzae 70-15]	gi%7c389623553 gi%7c351648959	72395	137	23	4	0.06	MSPTATNGDGAKGSNPTGGLSANDNIRRFPAPSRPLSPLPNHALFNDKTRCFVYGLQPRAVQGMLDFDFICKRSTPSVAGIIYTFGGQFVSKMYWGTSETLLPVYQEVQKAVAKHPDVDTVVNFASSRSVYSSTLELMEYPNIKTIAIIAEGVPERRAREIAHIAKKKGITIIGPATVGGIKPGSFKIGNTGGMMDNIVASKLYRKGSVGYVSKSGGMSNELNNIISQNTDGVYEGVAIGGDRYPGTTFIDHLLRYQADPDCKILLLLGEVGGVEEYKVIEAVKEGVITKPIVAWAIGTCASMFKTEVQFGHAGSFANSQLETAATKNKSMKEAGFYVPNTFEELPELLSSLYQKLVKDGTIKPQAEPAVPKIPIDYSWAQELGLIRKPAAFISTISDD…	5.75	AGKDLISALVSGLLTIGSR-DLISALVSGLLTIGSR-MGVLNGLFVLGR-SIGLIAHYLDQK-	#
20130513_tam109	ATP-citrate synthase subunit 1 [Gaeumannomyces graminis var. tritici R3-111a-1]	gi%7c402076416	72182	137	23	4	0.06	MPAATTTKGASGTNPTGGLSANDNIARFPAPSRPLSPLPTHALFNDKTRCFVYGLQPRAVQGMLDFDFICKRSSPSVAGIIYTFGGQFVSKMYWGTSETLLPVYQEVTKAMAKHPDVDVVVNFASSRSVYSSTLELMEYPQIKTIAIIAEGVPERRAREIAHIAKKKGVTIIGPATVGGIKPGCFKIGNTGGMMDNIVASKLYRKGSVGYVSKSGGMSNELNNIVSQTTDGVYEGVAIGGDRYPGTTFIDHMMRYQADPECKILVLLGEVGGVEEYKVIEAVKQGVITKPIVAWAIGTCASMFKTEVQFGHAGSFANSQLETAATKNKSMKEAGFHVPDTFEDMPKVLAEVYQKLVKEGTIKPQPEPAVPKIPIDYSWAQELGLIRKPAAFISTISDDR…	5.75	AGKDLISALVSGLLTIGSR-DLISALVSGLLTIGSR-MGVLNGLFVLGR-SIGLIAHYLDQK-	#
20130513_tam109	ATP citrate lyase_ subunit 1 [Aspergillus fumigatus Af293]	gi%7c70992209 gi%7c66848586	78779	137	23	4	0.05	MVQPSPPSRIPPRAALARYCTNTVSSGKVSSSPQLLDIVEPPPPSTQPSCPHLLLSLALPMAISTPMTTSLASSLPAECSLLLLTLSSTTRRDASYSKCFLAANRVNGWADGYHSGMQPRAVQGMLDFDFICKRSTPSVAGIIYTFGGQFVSKMYWGTSETLLPVYQDVAKAMAKHPDVDTVVNFASSRSVYSSTMELMNYPQIKSIAIIAEGVPERRAREIMVTAKEKGITIIGPATVGGIKPGAFKIGNTGGMMDNIVASKLYRKGSVGYVSKSGGMSNELNNIISQTTDGVHEGIAIGGDRYPGTTFIDHLLRYQADPDCKILLLLGEVGGVEEYRVIEAVKNGTITKPLVAWAIGTCASMFKTEVQFGHAGASANSQLETAVYKNKAMREAGIHV…	5.75	AGKDLISALVSGLLTIGSR-DLISALVSGLLTIGSR-MGVLNGLFVLGR-SIGLIAHYLDQK-	#
20130513_tam109	vacuolar ATP synthase subunit B [Aspergillus terreus NIH2624]	gi%7c115384236 gi%7c114196357	57255	131	13	4	0.09	MASEFVDPRMTSIKPRIRYNTIGGINGPLVVLDNVKFPRYNEIVSLTLPDGTERSGQVLEARGNRAVVQVFEGTSGIDVKKTKVEFTGHSLKLGVSEDMLGRVFDGSGRAIDKGPKVLAEDYLDINGQPINPYSRVRQVYPEEMISTGISAIDTMNSIARGQKIPIFSAAGLPHNEIAAQICRQAGLVKRPTKDVHDGHEENFSIVFAAMGVNMETARFFTRDFEENGSMERVTLFLNLANDPTIERIITPRLALTTAEYYAYQLEKHVLVIMTDLSAYCDALREVSAAREEVPGRRGYPGYMYTDLSTIYERAGRVEGRNGSITQIPILTMPNDDITHPIPDLTGYITEGQIFIDRQLYNKGVNPPINVLPSLSRLMKSAIGEGRTRKDHSDVSNQLY…	3.25	LGVSEDMLGR-VTLFLNLANDPTIER-LALTTAEYYAYQLEK-VLDEFYAR-	#
20130513_tam109	v-type proton ATPase subunit B [Aspergillus niger CBS 513.88]	gi%7c145231739 gi%7c134056247	56671	131	13	4	0.09	MADFVDPRMTSVKPRIRYNTIGGINGPLVFLDNVKFPRYNEIVSLTLPDGTERSGQVLEARGNRAIVQVFEGTSGIDVKKTKVEFTGHSLKLGVSEDMLGRVFDGSGRAIDKGPKVLAEDYLDINGQPINPYSRVYPEEMISTGISAIDTMNSIARGQKIPIFSAAGLPHNEIAAQICRQAGLVKRPTKDVHDGHEENFSIVFAAMGVNMETARFFTRDFEENGSMERVTLFLNLANDPTIERIITPRLALTTAEYYAYQLEKHVLVIMTDLSAYCDALREVSAAREEVPGRRGYPGYMYTDLSTIYERAGRVEGRNGSITQIPILTMPNDDITHPIPDLTGYITEGQIFIDRQLHNKGVYPPINVLPSLSRLMKSAIGTGRTRKDHSEVSNQLYAKYA…	3.25	LGVSEDMLGR-VTLFLNLANDPTIER-LALTTAEYYAYQLEK-VLDEFYAR-	#
20130513_tam109	V-type ATPase_ B subunit_ putative [Talaromyces stipitatus ATCC 10500]	gi%7c242779009 gi%7c218722974	56869	131	13	4	0.09	MAPEFTDPRMTSIKPRIRYNTIGGVNGPLVILDNVKFPRYNEIVSLTLPDGTERSGQVLEARGNRAVVQVFEGTPGIDVKRTKVEFTGHSLKLGVSEDMLGRVFDGSGRAIDKGPKVLAEDYLDINGSPINPYSRVYPEEMISTGISAIDTMNSIARGQKIPIFSASGLPHNEIAAQICRQAGLVKPTKDVHDGHEDNFSIVFAAMGVNMETARFFTRDFEENGSMERVTLFLNLANDPTIERIITPRLALTTAEYYAYQLEKHVLVILTDLSAYCDALREVSAAREEVPGRRGYPGYMYTDLSTIYERAGRVEGRNGSITQIPILTMPNDDITHPIPDLTGYITEGQIFIDRQLDNRGVYPPINVLPSLSRLMKSAIGEGRTRKDHGDVSNQLYAKYA…	3.25	LGVSEDMLGR-VTLFLNLANDPTIER-LALTTAEYYAYQLEK-VLDEFYAR-	#
20130513_tam109	malate synthase [Dichomitus squalens LYAD-421 SS1]	gi%7c395333096	60394	104	9	4	0.05	MVAGVQIHSSQAKDAQAQILTEDALKFIAALHRTFESTRQSLLVAREAAQQRLDAGQPLDFPSETAHIRADPSWLCAPPGPGLEDRRVEITGPTDRKMVINALNSGAKTFMADFEDANSPTFANMLNGQVNLRDAIRRQIDFESGGKSYKLSEKPAVLIVRPRGWHLDEPRVTVDNAPVSGSLFDFALYFFHNAHELVKRGLGPYFYLPKMEHYLEARLWNDVFNFSQSYIRLPHGTIRATVLIETLPAAFQMEEILFELRTHSAGLNCGRWDYIFSFIKRRRADRSAVLPDRKDVTMEVGFMDAYVRLLIQTCHRRRVAAMGGMSAQIPIKNDPKANEVAMSKVRADKLREVTNGHDGTWIAHPLINEIAMEIFNKHMLGPNQYHVRREDVKVAAADL…	2.25	RVEITGPTDR-VEITGPTDR-GLGPYFYLPK-WDYIFSFIK-	#
20130513_tam109	nucleoside diphosphate kinase A [Arthroderma otae CBS 113480]	gi%7c296817137 gi%7c238839358	16997	185	55	3	0.22	MSTEQTFIAIKPDGVQRGLVGPIISRFESRGFKLVAMKLVTPSKEHLETHYADLSSKPFFKGLVTYMLSGPICAMVWEGRDAVKTGRTILGATNPLDSAPGTIRGDYAIDVGRNVCHGSDSVENAKKEIALWFKEGEVLNYKHSQFDWIYEKP	18.3333	GLVGPIISR-TILGATNPLDSAPGTIR-GDYAIDVGR-	#
20130513_tam109	RecName: Full=Glyceraldehyde-3-phosphate dehydrogenase_ Short=GAPDH	gi%7c205371757 gi%7c168049 gi%7c168051 gi%7c259480793	36289	171	43	3	0.09	MAPKVGINGFGRIGRIVFRNAIEAGTVDVVAVNDPFIETHYAAYMLKYDSQHGQFKGTIETYDEGLIVNGKKIRFHTERDPANIPWGQDGAEYIVESTGVFTTQEKASAHLKGGAKKVVISAPSADAPMFVMGVNNETYKKDIQVLSNASCTTNCLAPLAKVINDNFGIIEGLMTTVHSYTATQKVVDGPSAKDWRGGRTAATNIIPSSTGAAKAVGKVIPSLNGKLTGMAMRVPTSNVSVVDLTVRTEKAVTYDQIKDAVKKASENELKGILGYTEDDIVSTDLNGDTRSSIFDAKAGIALNSNFIKLVSWYDNEWGYSRRVVDLITYISKVDAQ	14.3333	VGINGFGR-AGIALNSNFIK-LVSWYDNEWGYSR-	#
20130513_tam109	glyceraldehyde 3-phosphate dehydrogenase GpdA [Penicillium marneffei ATCC 18224]	gi%7c212541899 gi%7c157057025 gi%7c157057027 gi%7c210066011 gi%7c387355408	36407	171	43	3	0.09	MVTKVGINGFGRIGRIVFRNVIEHDDAEVVAVNDPFIETHYAAYMLKYDTQHGQFKGTIEVEGSDLIVNGKRVKFYQERDPANIKWSETGAAYIVESTGVFTTTEKASAHLKGGAKKVVISAPSADAPMFVMGVNHTTYKSSDTIISNASCTTNCLAPLAKIVNDNWGLVEGLMTTIHSYTATQKTVDGPSAKDWRGGRTAAQNIIPSSTGAAKAVGKVIPALNGKLTGMSMRVPTSNVSVVDLTCRTEKPVSYDEIKATVKKYAEGELKGIMGYTEDDVVSTDMNGNSNSSVFDAKAGIALNSNFIKLVSWYDNEWGYSRRVVDLIVYISKVDGNA	14.3333	VGINGFGR-AGIALNSNFIK-LVSWYDNEWGYSR-	#
20130513_tam109	glyceraldehyde 3-phosphate dehydrogenase GpdA [Talaromyces stipitatus ATCC 10500]	gi%7c242770243 gi%7c218725135	36512	171	43	3	0.09	MVTKVGINGFGRIGRIVFRNIIEHGEAEVVAVNDPFIETHYAAYMLKYDTQHGQFKGTIEVDGTDLVVNGKRVKFYQERDPANIKWSETGAAYIVESTGVFTTTEKASAHLKGGAKKVVISAPSADAPMFVMGVNHTEYKPENTIISNASCTTNCLAPLAKIVNDNWGLVEGLMTTVHSYTATQKTVDGPSAKDWRGGRTAAQNIIPSSTGAAKAVGKVIPSLNGKLTGMSMRVPTSNVSVVDLTCRTEKPVSYDEIKKVVKQYSEGELKGIMGYTEDDVVSSDLNGNTNSSIFDAKAGIALNSNFIKLVSWYDNEWGYSRRVVDLIVYISKVDGNA	14.3333	VGINGFGR-AGIALNSNFIK-LVSWYDNEWGYSR-	#
20130513_tam109	citrate synthase [Gaeumannomyces graminis var. tritici R3-111a-1]	gi%7c402073797	51921	130	31	3	0.07	MASAVRFSSAALRASIRVSFAQRTAFTGLRCYSAKTQTLKERFAELLPEKIEQIKALRKEHGSKVVDKVTLDQVYGGARGIKALVWEGSVLDSEEGIRFRGKTIPECQELLPKAPGGKEPLPEGLFWLLLTGEVPSEAQVRALSAEWAARSDIPKFVEELIDRCPTDLHPMAQFSLAVTALEHTSSFAKAYAKGINKKEYWGYTFEDSMDLIAKLPTIAARIYQNIYGSGKVAPVQKDKDYSFNFANQLGFGSNEDFIELMRLYLTIHTDHEGGNVSAHTTHLVGSALSSPFLSLAAGLNGLAGPLHGLANQEVLNWLTEMKKVVGNDLSDESITKYLWDTLNSGRVVPGYGHAVLRKTDPRYTAQRVFAQAKMPEDPMFKLVSQVYKIAPKVLTEHGK…	10.3333	ALVWEGSVLDSEEGIR-ALSAEWAAR-AIGVLPQLIIDR-	#
20130513_tam109	catalase [Botryotinia fuckeliana]	gi%7c15022485	78523	190	28	3	0.04	MYLATVLSLVGLVTAQCPYGMDKQPQKREPKDSQTSSSNFLDQFTLNDTNTYFTTDAGGPIQEDTSLKAGARGPTLLEDFIFRQKIQHFDHERVPERAVHARGAGAHGIFTSYGNYSNITAASFLNQEGKETPVFVRFSTVAESRGSADTARDVHGFATRFYTDEGNFDIVGNNIPVFFIQDAILFPDLIHAVKPSPDNEIPQAATAHDSAWDFFSQQPSSLHTLFWAMAGNGIPRSFRHMDGFGIHTFRLVTDSGTSKLVKWHWKSKQGKASLVWEEAQVLAGKNADFHRKDLWDAIESGNGPEWELGIQIVEEEDVLKFGFDLLDPTKILPEELVPVQKIGVMRLNANPRNYFAETEQVMFQPGHIVRGIDFTDDPLLQGRIFSYLDTQLNRHGGPN…	9.33333	GPTLLEDFIFR-FGFDLLDPTK-GIDFTDDPLLQGR-	#
20130513_tam109	Pc21g17590 [Penicillium chrysogenum Wisconsin 54-1255]	gi%7c255956007 gi%7c211590467	48839	131	25	3	0.06	MSASSRIPPIAQPFVSEHAKRTLDLVEEFVEKDCIPADTVFSAQLGEGEKRWTTTPTVLEGLKEKAKKLGLWNMFLPKNHFTQGAGFSNLEYGLMAELLGKSKVASEATNNAAPDTGNMEVFAKYGNDAQKKQWLAPLLEGKIRSAFLMTEPDVASSDATNIELNIRREGNEYVLNGSKWWSSGAGDPRCAIYLVMGKTDPTNPDTYKQQSVILVPAGLPGITVHRMLTVYGYDDAPHGHGHITFKDVRVPASNMVLGEGRGFEIIQGRLGPGRIHHAMRAIGAAERALEWLIARVNDERKMTFGKPLVAHGVILEWIAKSRIEVDAARLIVLNAAIKIDQGDAKSALKEIAQAKVLVPQTALTIIDRAVQAYGAAGVCQDTPLAYLWAGIRTLRIADG…	8.33333	GFEIIQGR-ALEWLIAR-VLVPQTALTIIDR-	#
20130513_tam109	isocitrate lyase [Aspergillus terreus NIH2624]	gi%7c115389810 gi%7c114194806	60009	162	17	3	0.07	MGFFEDEDQKYQQDVEAVKAWWKDDRWRYTKRPYTAEQIVAKRGNLKIDYPSNVQSKKLWKILESNFQQKVASFTYGCLEPTMVTQMAKYLDTVYVSGWQSSSTASSTDEPSPDLADYPMNTVPNKVNQLFMAQLFHDRKQREERVTTPKEQRGKVANVDYLRPIIADADTGHGGLTAVMKLTKLFVERGAAGIHIEDQAPGTKKCGHMAGKVLVPISEHINRLVAIRAQADIMGTDLLAIARTDSEAATLITSTIDYRDHAFIVGATNPNLQPLNDLMVAAEQAGKNGDQLQAIEDQWVAQAGLKLFNDAVIDEINKGSLPNKPAVIADYLKAVKGKSNSEARAIAKGILGVDIYWNWDSPRTREGYYRYQGGTQCAINRAVAYGPFADLIWMESKLP…	5.66667	VLVPISEHINR-AQADIMGTDLLAIAR-TDSEAATLITSTIDYR-	#
20130513_tam109	isocitrate lyase [Aspergillus niger CBS 513.88]	gi%7c145230077 gi%7c85691195 gi%7c134055462 gi%7c350638414	60204	162	17	3	0.07	MASFEEEDRKYLDDVQAVQKWWQDSRWRHTKRPFTAEQIVAKRGTLKIEYPSNAMSKKLWKILESNFEKKVPSFTYGCLEPTMLTQMAKYLDTVYVSGWQSSSTASSTDEPSPDLADYPMNTVPNKVNQLFLAQLFHDRKQREERITTPKEQRGKVANVDYLRPIIADADTGHGGLTAVMKLTKLFIERGAAGIHIEDQAPGTKKCGHMAGKVLVPISEHINRLVAIRAQADIMGTDLLAIARTDSEAATLITSTIDYRDHAFVVGSTNPNLQPLNDLMVAAEQAGKNGNELQAIEDQWVAQAGLKLFSEAVIDTINKSSSGNKKALIDEYLKKAKGKSNREARAIAKDITGVDIYWDWDAPRTREGFYRYQGGTQCAVNRAIAYGPFADLIWMESKLP…	5.66667	VLVPISEHINR-AQADIMGTDLLAIAR-TDSEAATLITSTIDYR-	#
20130513_tam109	isocitrate lyase AcuD [Penicillium marneffei ATCC 18224]	gi%7c212534768 gi%7c210069939	60528	162	17	3	0.07	MASTNFDLEDQKYLEDVNAVKQWWTDSRWRYTKRPFTAEQIVAKRGTLKIEYPSNTQAKKLWKILEERFNDKTVSYTYGCLEPTMLTQMIKYLDTIYVSGWQSSSTASSTDEPSPDLADYPMNTVPNKVNQLFMAQLFHDRKQREERITTPREKRSSVQNYDYLRPIIADADTGHGGLTAVMKLTKLFVERGAAGIHIEDQAPGTKKCGHMAGKVLVPISEHINRLVAIRAQADIMGTDLLAIARTDSEAATLITSTIDYRDHAYLLGSTNPSLQPLNDLMVAAEQSGKSGEQLQAIEDSWIAQAGIKKFDDAVIDTINQGSFANKKELIDRYLTAAKGKSNSEARAIAKGITGMDIYWNWDAPRTREGFYRYQGGTQCAVNRAVAYAPFADLIWMESK…	5.66667	VLVPISEHINR-AQADIMGTDLLAIAR-TDSEAATLITSTIDYR-	#
20130513_tam109	40S ribosomal protein S3_ putative [Metarhizium acridum CQMa 102]	gi%7c322693782	27990	150	17	3	0.12	MSFSSSSKRRKFVADGVFYAELNEFFQRELAEEGYSGVEVRVTPTVTDIIIRATQTQEVLGEQGRRIRELTSLIQKRFKFPENSVSLYAAKVQNRGLSAVAQCESLRYKLLNGLAVRRACYGVLRFIMESGAKGCEVVVSGKLRAARAKSMKFTDGFMIHSGQPAKEFIDTATRHVLLRQGVLGIKVKIMRGSDPDGKAGPSKSLPDAVTIFEPKEEQVVLQPVSQDYGAKAAAAQASQDARVAEQEGEAEPAQQ	5.66667	ELAEEGYSGVEVR-VTPTVTDIIIR-EFIDTATR-	#
20130513_tam109	cytoplasmic ribosomal protein subunit S3 [Metarhizium anisopliae ARSEF 23]	gi%7c322709405	28169	150	17	3	0.12	MAHPGAQISKRRKFVADGVFYAELNEFFQRELAEEGYSGVEVRVTPTVTDIIIRATQTQEVLGEQGRRIRELTSLIQKRFKFPENSVSLYAAKVQNRGLSAVAQCESLRYKLLNGLAVRRACYGVLRFIMESGAKGCEVVVSGKLRAARAKSMKFTDGFMIHSGQPAKEFIDTATRHVLLRQGVLGIKVKIMRGSDPDGKAGPSKSLPDAVTIFEPKEEQVVLQPVSQDYGAKAAAAQASQDARVAEQEGEAEPAQQ	5.66667	ELAEEGYSGVEVR-VTPTVTDIIIR-EFIDTATR-	#
20130513_tam109	40S ribosomal protein S5 [Neosartorya fischeri NRRL 181]	gi%7c119494910 gi%7c119412417	23876	95	11	3	0.15	MSDHGEVEVENPSGAFQALPKDALAEMGTVKLFNKWSYEDVEIRDISLTDYIQIRNPVYIPHTAGRYAAKRFRKAQCPIIERLTNSLMMNGRNNGKKLMAVRIVAHAFEIIHIMTDQNPLQVAVDAIVNCGPREDSTRIGSAGTVRRQAVDVSPLRRVNQAIALLTIGAREASFRNIKSIAECLAEELINAAKGSSNSYAIKKKDELERVAKSNR	3.66667	WSYEDVEIR-DISLTDYIQIR-VNQAIALLTIGAR-	#
20130513_tam109	40S ribosomal protein S5 [Aspergillus clavatus NRRL 1]	gi%7c121700975 gi%7c119396895	23862	95	11	3	0.15	MSDHGEVEVENPSGAFQALPKDALAEMGSVKLFNKWSYEDVEIRDISLTDYIQIRNPVYIPHTAGRYAAKRFRKAQCPIIERLTNSIMMNGRNNGKKLMAVRIVAHAFEIIHIMTDQNPLQVAVDAIVNCGPREDSTRIGSAGTVRRQAVDVSPLRRVNQAIALLTIGAREASFRNIKSIAECLAEELINAAKGSSNSYAIKKKDELERVAKSNR	3.66667	WSYEDVEIR-DISLTDYIQIR-VNQAIALLTIGAR-	#
20130513_tam109	40S ribosomal protein S5 [Botryotinia fuckeliana B05.10]	gi%7c154320341 gi%7c156065671 gi%7c154691705 gi%7c347827805	23731	95	11	3	0.15	MSEGEIEVEAVSGYQVLPKEVTEEIGSIKLFNKWSYEDVEIRDISLTDYIQIRAPVYISHSAGRYAQKRFRKANCPIIERLTNSLMMNGRNNGKKLMAVRIVAHAFEIIHIMTDQNPIQVAVDAIVNCGPREDSTRIGSAGTVRRQAVDVSPLRRVNQAIALLTIGAREASFRNVKSIAECLAEELINAAKGSSNSYAIKKKDELERVAKSNR	3.66667	WSYEDVEIR-DISLTDYIQIR-VNQAIALLTIGAR-	#
20130513_tam109	40S ribosomal protein S5 [Exophiala dermatitidis NIH/UT8656]	gi%7c378732589	23825	95	11	3	0.15	MSDNGEVEVEVPVSGYAVLPKDVTAEIGTIKLFNKWSYEDVEIRDISLTDYIQIRSPVYLPHSAGRYAAKRFRKAQCPIIERLTNSLMMNGRNNGKKLMAIRIVAHAFEIIHIMTDQNPIQVAVDAIVNCGPREDSTRIGSAGTVRRQAVDVSPLRRVNQAIALLTIGAREASFRNVKSIAECLAEELINAAKGSSNSYAIKKKDELERVAKSNR	3.66667	WSYEDVEIR-DISLTDYIQIR-VNQAIALLTIGAR-	#
20130513_tam109	40S ribosomal protein S5 [Zymoseptoria tritici IPO323]	gi%7c398407145 gi%7c339474922	23709	95	11	3	0.15	MSDGEVEVEAVQAYPVLPKDVTAEIGSIKLFNKWSYEDVEIRDISLTDYIQIRQPVYISHSAGRYAVKRFRKAQCPIIERLTNSLMMNGRNNGKKLMAVRIVAHAFEIIHIMTDQNPIQIAVDAIVNCGPREDSTRIGSAGTVRRQAVDVSPLRRVNQAIALLTIGAREAAFRNIKSIAECLAEELINAAKGSSNSYAIKKKDELERVAKSNR	3.66667	WSYEDVEIR-DISLTDYIQIR-VNQAIALLTIGAR-	#
20130513_tam109	hypothetical protein ATEG_10283 [Aspergillus terreus NIH2624]	gi%7c115449531 gi%7c114187580	69757	93	11	3	0.04	MVAKNHLPVDLSQFKKLKLDPKNPKLSDQQKQDLLHNINVFRDAIVAFTATGSARGLAGHTGGPFDTAPEVCILLAFINANPNGFVDAIFDEAGHRVATQYLLAALDGKIDPDHLLNYRDANSKLPGHPELGLTPGVKFSSGRLGHMWAMVNGISMANRDKTVLLLGSDGSQQEGNDAEAARIAVANNLNVKLFIDNNDVTIAGHPSQYLPGYTLERTLQGHGLKVIHAQGEDIDSLYAAMCETINASGPAAVIVNRKMAPGIEGIEGTTKAHDVIPVDAARKYLTKRGYTQEQLAFYDDIKSLPNPHQYWGSTKDKGSNRVIFGEAVNSVLDELSKEEAARRVMVIDSDLEGSTGLKGIHSSHPEVFVASGVMERGNFSAAAGFGFGSNGERQGVFST…	3.66667	DAIVAFTATGSAR-IAVANNLNVK-FIFSTR-	#
20130513_tam109	peroxisomal 3-ketoacyl-coA thiolase (Kat1)_ putative [Aspergillus clavatus NRRL 1]	gi%7c121715632 gi%7c119403582	43730	116	9	3	0.09	MSTPQQRLSSIASQVAGSGVSAKSKLLAKNPDDIVITLAVRTPLTKARKGGLKDTTIDNLLVSLLTSIREKSNLDPSLVEDVCVGNVLAPGSAYVARSAVLAAGFPVTAAASIANRFCSSGLLAIQNIANQIMAGSIDVGIAVGAESMSTNADGGAPDMSAQILSHPIASQNTQPMGQTSENVAAQFNISREQHDQFAAKSYQKAERAQKAGWTVDEIVPVRTQVKDPKTGEVKDVVVDRDDGVRYGTTAESLGKIRSAFPQWKPSATTGGNASQITDGAAGVILMKRSRAQELGQPIIGKFCGATVAGLEPRIMGIGPSIAIPKILSKFGLTKDDVDVFEINEAFASMGVYCVSKLGLDESKVNPRGGAIALGHPLGATGARQVVTALSELRRQNKRI…	3	IMGIGPSIAIPK-GGAIALGHPLGATGAR-QVVTALSELR-	#
20130513_tam109	TUB1 protein [Sordaria macrospora k-hell]	gi%7c336261212 gi%7c380090651	50165	107	8	3	0.08	MRGEVVHIHLGQAGTQLGNSAWELYLLEHGLTQDGRKDPDSAVAGEGGSYDTFFTESSNGKYVPRSLFVDLDPSPIDEIRTGPYRQLFHPELLISGKEDAANNYARGHYTVGKEMAENVLDRIRKITDNCHSLQGFLVFHSFGGGTGSGFGALVLERLAQDYGKKCKLEFSVYPAPRVATAVVEPYNAVLATHSTLEHSDVTFLVDNEAVYDICRRNLDIPRPSYEHLNRLIAQVVSSITSSLRFDGALNVDLNEFQTNLVPFPRVHYPLISYAPVISATKSAHESFKTSELTLQCFEPNNQMVVCDPRNGKYMAVALLYRGDVVPRDTAAAVAALKAKSSFNLVEWCPTGFKIGINHQKPMSVPTASPADGGLASVDRSVSMLSNTTAIAEAWSRLDH…	2.66667	SLFVDLDPSPIDEIR-LEFSVYPAPR-LIAQVVSSITSSLR-	#
20130513_tam109	alpha-tubulin A [Neurospora crassa]	gi%7c902699	50109	107	8	3	0.08	MRGEVVHIHLGQAGTQLGNSAWELYLLEHGLTQDGRKDPDSTVAGEGGSYDTFFTESSNGKYVPRSLFVDLDPSPIDEIRTGPYRQLFHPELLISGKEDAANNYARGHYTVGKEMAENVLDRIRKITDNCHSLQGFLVFHSFGGGTGSGFGALVLERLAQDYAKKCKLEFSVYPAPRVATAVVEPYNAVLATHSTLEHSDVTFLVDNEAGMTCRRNLDIPRPSYEHLNRLIAQVVSSITSSLRFDGALNVDLNEFQTNLVPFPRVHYPLISYAPVISATKSAHESFKTSELTLQCFEPNNQMVVCDPRNGKYMAVALLYRGDVVPRDTSAAVAALKAKSSFNLVEWCPTGFKIGINHQKPMSVPTASPADGGLASVDRSVSMLSNTTAIAEAWSRLDHK…	2.66667	SLFVDLDPSPIDEIR-LEFSVYPAPR-LIAQVVSSITSSLR-	#
20130513_tam109	NADH-ubiquinone oxidoreductase 30.4 kDa subunit_ mitochondrial precursor [Aspergillus terreus NIH2624]	gi%7c115400439 gi%7c114191474	75626	103	6	3	0.05	MRQAQRPPEGALRAPVVNPADKYQDKADSLHKYGQYIMACLPKHVQQFSVWKDELVIYVPPTGVIPVMSFLKYHTAAEYTQISDITAVDFPTRDQRFEVVYNLLSVRYNSRIRVKTYADEARPVPSVTGLFEGALWYEREVYDMFGVFFSGHPDLRRIMTDYGFDGHPLRKDFPLTGYTELRYDEEKKRIVIEPLELTQAFRNFEGGTAAWEPVGLGQDRKPESYMRKFVCGDSPSPVLARRILFSAAPCSPSSHPITTNKMPKRKLSDLDSSSHYGQGLQLTRLFAKFDHGVTLLSRALKTARGFERQKLGRREKTAKAAGNNDTLTRLAEEVQVLKSLDPAQTAQRYLFKQLVKTKRIAEAPVFVQFREKKKLAPEGPRSTAEANVTARLYKSTPVK…	2	FEVVYNLLSVR-DFPLTGYTELR-IVIEPLELTQAFR-	#
20130513_tam109	NADH-ubiquinone oxidoreductase 304 kDa subunit precursor [Neosartorya fischeri NRRL 181]	gi%7c119469919 gi%7c119406149	32477	103	6	3	0.12	MASARSLMRLGTGRSLASAVRSSQTCRAFSSTVQLASKVPEPENMRQAHRPPQGALRAPAVNPADKYQDKAESLHKYGQYVMSCLPKYVQQFSVWKDELTIYVPPTGIIPVMSFLKYHTAAEFTQISDITAVDFPTRDQRFEVVYNLLSVRYNSRIRVKTYADEASPVPSVTSLYEGALWYEREVYDMFGVFFSGHPDLRRIMTDYGFDGHPLRKDFPLTGYTELRYDEEKKRIVIEPLELTQAFRNFEGGTAAWEPVGSGVDRKPDSFKLPTPKPEEKKEDEKK	2	FEVVYNLLSVR-DFPLTGYTELR-IVIEPLELTQAFR-	#
20130513_tam109	Pc12g08820 [Penicillium chrysogenum Wisconsin 54-1255]	gi%7c255932309 gi%7c211582330	32480	103	6	3	0.12	MASARSLMRLGSGRSVASATRSMAARTFSSASLQCAPKASTAPGPEPENMRQAQRPPSGPLRAPVVNPTDKYQPMADSLHAYGQYVMSCLPKYIQQFTVWKDELTVYTAPAGVVPVMSFLKNHTAAEFTQISDITGVDFPTRDQRFEVVYNLLSVRHNSRIRVKTYADEATPVPSVTGLFEGALWYEREVYDMFGVFFSGHPDLRRIMTDYGFDGHPLRKDFPLTGYTELRYDEEKKRIVIEPLELTQAFRNFESGSTAWEPVGAGQNRTPESFKLPTPKPEEKQEEKK	2	FEVVYNLLSVR-DFPLTGYTELR-IVIEPLELTQAFR-	#
20130513_tam109	succinate:fumarate antiporter (Acr1)_ putative [Neosartorya fischeri NRRL 181]	gi%7c119482267 gi%7c119409316	35068	96	5	3	0.09	MAAKSVEGNKGKKPASAAVNLIAGGGAGMMEALVCHPLDTIKVRMQLSRRARAPGAKPRGFITTGVEIVKKETALGLYKGLGAVLGGIIPKMAIRFTSYEWYKQMLADKETGAVTSKATFLAGLAAGVTEAVAVVNPMEVVKIRLQAQHHSLADPLDTPKYRSAPHALFTVIREEGFSTLYRGVSLTALRQGTNQAANFTAYTELKAFLQRAQPEYSNSQLPSYQTTLIGLISGAVGPFSNAPIDTIKTRLQKTRAEPGQSAVSRIMVIAKDMFKQEGARAFYKGITPRVMRVAPGQAVTFTVYEFLKGKLEESNWAFVGGKYEE	1.66667	GLGAVLGGIIPK-SAPHALFTVIR-GVSLTALR-	#
20130513_tam109	succinate:fumarate antiporter (Acr1) [Aspergillus fumigatus Af293]	gi%7c71002698 gi%7c66853668 gi%7c159130083	37468	96	5	3	0.08	MAAKSVEGNKGKKPASAAVNLIGMMTLLWCMDTSLAVMLTCDTAGGGAGMMEALVCHPLDTIKVRMQLSRRARAPGVKPRGFITTGVEIVKKETALGLYKGLGAVLGGIIPKMAIRFTSYEWYKQMLADKETGTVTSKATFLAGLAAGVTEAVAVVNPMEVVKIRLQAQHHSLADPLDTPKYRSAPHALFTVIREEGFSALYRGVSLTALRQGTNQAANFTAYTELKAFLQRVQPEYSNSQLPSYQTTVIGLISGAVGPFSNAPIDTIKTRLQKTRAEPGQSAINRIMVIAKDMFKQEGARAFYKGITPRVMRVAPGQAVTFTVYEFLKGKLEESNWAFVGGKYEE	1.66667	GLGAVLGGIIPK-SAPHALFTVIR-GVSLTALR-	#
20130513_tam109	hypothetical protein [Trichodesmium erythraeum IMS101]	gi%7c113475652 gi%7c110166700	17321	78	41	2	0.07	MTDSQKVPVDEKFVPFLQKVQTQARLPDIYDARDISIIIFRTMRDLMTTEASNQIASDLASSSEKPDPDEIGELWKDNNPLVAFLSKVRRPLIFDGKTFIFRVSQEAGVPKGIAAETVIKAVFSAVKEELSTQRIQEIAKFMPDEIKIMWNKA	20.5	TFIFR-FMPDEIK-	#
20130513_tam109	histone H4.2 [Coccidioides immitis RS]	gi%7c119190663 gi%7c303315171 gi%7c240107263 gi%7c320035617 gi%7c392868776	11423	103	18	2	0.17	MTGRGKGGKGLGKGGAKRHRKILRDNIQGITKPAIRRLARRGGVKRISAMIYEETRTVLKSFLESVIRDAVTYTEHAKRKTVTSLDVVYALKRQGRTLYGFGG	9	ISAMIYEETR-SFLESVIR-	#
20130513_tam109	histone H4.2 [Uncinocarpus reesii 1704]	gi%7c258565241 gi%7c237907066	11407	103	18	2	0.17	MSGRGKGGKGLGKGGAKRHRKILRDNIQGITKPAIRRLARRGGVKRISAMIYEETRVVLKSFLESVIRDAVTYTEHAKRKTVTSLDVVYALKRQGRTLYGFGG	9	ISAMIYEETR-SFLESVIR-	#
20130513_tam109	H42_EMENI Histone H4.2 [Aspergillus nidulans FGSC A4]	gi%7c67523941 gi%7c169774419 gi%7c212537025 gi%7c238497043 gi%7c122094 gi%7c296339 gi%7c529957 gi%7c40744976 gi%7c83769540 gi%7c210068410 gi%7c220694637 gi%7c259487838 gi%7c391867702 gi%7c227598	11365	103	18	2	0.17	MSGRGKGGKGLGKGGAKRHRKILRDNIQGITKPAIRRLARRGGVKRISAMIYEETRGVLKSFLESVIRDAVTYTEHAKRKTVTSLDVVYALKRQGRTLYGFGG	9	ISAMIYEETR-SFLESVIR-	#
20130513_tam109	60S ribosomal protein L5 [Neosartorya fischeri NRRL 181]	gi%7c119495376 gi%7c119412636	42053	85	16	2	0.07	MVYRCCGVLSDFRCGCPPLVANLNLRWDAATLSETIHKVGPRNFQPLQSSSAANVDNSVFQIAATVKMPFHKLVKNSAYYSRYQTKYRRRREGKTDYYARKRLITQAKNKYNAPKYRLVVRFTNRDIITQIVYSEITGDKVFASAYSHELKRYGITQGLTNWAAAYATGLLLARRTLKKLGLDEQFTGVEEADGEYKLTEAVETDDGTRRPFKAFLDVGLVRTSTGARVFGAMKGASDGGIFIPHSENRFPGFDIESEELDAETLRNYIFGGHVSEYMETLADDDEERYRSQFAKYIENEIDAGDLEDIYAEAHKAIREDPFKKDEDEEPKKSKEEWKAESKKYRKTKLSHEERKARVEQKIRELAA	8	AFLDVGLVR-FPGFDIESEELDAETLR-	#
20130513_tam109	60S ribosomal protein L5 [Aspergillus clavatus NRRL 1]	gi%7c121701409 gi%7c119397112	34581	85	16	2	0.08	MPFHKQVKNSAYYSRYQTKYRRRREGKTDYYARKRLITQAKNKYNAPKYRLVVRFTNRDIITQIVYSEISGDKVFASAYSHELKRYGITQGLTNWAAAYATGLLLARRTLKKLGLDEQFAGVEEADGEYKLTEAVETDDGTRRPFKAFLDVGLVRTSTGARVFGAMKGASDGGIFIPHSENRFPGFDIESEELDAETLRNYIFGGHVSEYMETLADDDEERYRSQFIKYIESEIDAGDIEELYTEAHAAIREDPFKKDEDEGAKKTKEEWKAESKKYQKAKLTHAERKARVEQKIRELAA	8	AFLDVGLVR-FPGFDIESEELDAETLR-	#
20130513_tam109	enolase BAC82549-Penicillium chrysogenum [Penicillium chrysogenum Wisconsin 54-1255]	gi%7c255938796 gi%7c211584789	47193	122	15	2	0.07	MPISKIHARSVYDSRGNPTVEVDVVTETGLHRAIVPSGASTGQHEAVELRDGDKTKWGGKGVLNAVKNVNDVIGPALIKENIDVKDQAKVDEFLNKLDGTPNKGKLGANAILGVSLAVAKAAAAEKGVPLYAHISDLAGTKKPFVLPVPFQNVLNGGSHAGGRLAFQEFMIVPDTAPTFSEGLRQGAEVYQKLKALAKKKYGQSAGNVGDEGGVAPDIQTAEEALDLITEAIEQAGYTGQIKIAMDVASSEFYKEDAKKYDLDFKNPESDPTKWLTYEQLADLYKSLAAKYPIVSIEDPFAEDDWEAWSYFYKTSDFQIVGDDLTVTNPLRIKKAIELKSCNALLLKVNQIGTLTESIQAAKDSYADGWGVMVSHRSGETEDVTIADIAVGLRAGQIKT…	7.5	SGETEDVTIADIAVGLR-IEEELGANAVYAGEK-	#
20130513_tam109	RecName: Full=Enolase_ AltName: Full=2-phospho-D-glycerate hydro-lyase_ AltName: Full=2-phosphoglycerate dehydratase	gi%7c74662366 gi%7c34392443	47207	122	15	2	0.07	MPISKIHARSVYDSRGNPTVEVDVVTETGLHRAIVPSGASTGLHEVVELRDGDKTKWGGKGVLNAVKNVNDVIGPALIKENIDVKDQAKVDEFLNKLDGTPNKGKLGANAILGVSLAVAKAAAAEKGVPLYAHISDLAGTKKPFVLPVPFQNVLNGGSHAGGRLAFQEFMIVPDTAPTFSEGLRQGAEVYQELKALAKKKYGQSAGNVGDEGGVAPDIQTAEEALDLITEAIEQAGYTGQIKIAMDVASSEFYKEDAKKYDLDFKNPESDPTKWLTYEQLADLYKSLAAKYPIVSIEDPFAEDDWEAWSYFYKTSDFQIVGDDLTVTNPLRIKKAIELKSCNALLLKVNQIGTLTESIQAAKDSYADGWGVMVSHRSGETEDVTIADIAVGLRAGQIKT…	7.5	SGETEDVTIADIAVGLR-IEEELGANAVYAGEK-	#
20130513_tam109	40S ribosomal protein S18 [Aspergillus clavatus NRRL 1]	gi%7c121700288 gi%7c119396551	17887	97	13	2	0.12	MSLVSGEKTNFQYILRLLNTNVDGKQKIMYALTQIKGVGRRYSNLVCKKADVDLSKRAGELTTEELERIVTILQNPTQYKIPTWFLNRQRDIVDGKDSQVLSNGLDSKLREDLERLKKIRSHRGLRHYWGLRVRGQHTKTTGRRGRTVGVSKKKS	6.5	AGELTTEELER-IPTWFLNR-	#
20130513_tam109	hypothetical protein AN5441.2 [Aspergillus nidulans FGSC A4]	gi%7c67538542 gi%7c40743411 gi%7c259485111	17997	97	13	2	0.12	MSLVSGEKTNFQYILRLLNTNVDGKEKIMYALTQVKGVGRRYSNLVCKKADVDLNKRAGELTTEELERIVTILQNPTQYKIPTWFLNRQRDIVDGKDYQVLSNGLDSKYREDLERLKKIRSHRGLRHYWGLRVRGQHTKTTGRRGRTVGVSKKKG	6.5	AGELTTEELER-IPTWFLNR-	#
20130513_tam109	aldehyde dehydrogenase AldA_ putative [Aspergillus flavus NRRL3357]	gi%7c238491024 gi%7c83768872 gi%7c220697162	53947	88	13	2	0.05	MADLFTTIETPSAKYEQPLGLFINNEFVKAKSGRTFETINPTNEKPIVAVQEADENDVEDAVKAARAAFEGEWSKVTPSERGRLLVKLADLFERDSDILAAIEALDNGKAFTMAKGDVAAAAGCLRYYGGWADKIHGQTIDTNPESLTYTRHEPIGVCGQIIPWNFPLLMWSWKIGPAIAAGNVVVLKTAEQTPLSGLYAAKLIKEAGFPAGVVNILSGFGRVAGAAISSHMDIDKIAFTGSTLVGRMILQAAAKSNLKKVTLELGGKSPNIVFDDADIDNAISWSNFGIFFNHGQCCCAGSRILVQEGIHDKFVARFKERAAANKLGNPFTADTFQGPQVSQLQFDRIMEYINHGKQEGATVATGGERHGTEGYFIQPTVFTDVHSDMKIAKEEIFGP…	6.5	VAGAAISSHMDIDK-ELGSYALENYTQVK-	#
20130513_tam109	Pc06g00180 [Penicillium chrysogenum Wisconsin 54-1255]	gi%7c255930149 gi%7c211581247	53761	88	13	2	0.05	MSLSTTIQTPNVTYEQPLGLFINNEFVKGVDGKTFETLNPTTEKPITSVYEASEKDVDIAVKAAREAFEGPWKKVTPSDRGRMLTKLADLFERDMETLASIEALDNGKAVTMAKVDIANAAGCLRYYGGWADKITGQTIDTNSETLSYTRHEPVGVCGQIIPWNFPILMWAWKIGPAIAAGNTVLIKTAEQTPLSGLYASKLIVEAGFPPGVINVISGFGRVAGAAISSHMDIDKVAFTGSTLVGRMILQAAAKSNLKKVTLELGGKSPNIVFEDADIDNAISWANFGIFFNHGQCCCAGSRLLVQESIHDKFVARFKERAAQNKLGNPFEGDTFQGPQVSQLQFDRIMEYINHGKTEGATVALGGERHGTEGYFIQPTVFTDVTPDMKIAQEEIFGPV…	6.5	VAGAAISSHMDIDK-ELGSYALENYTQVK-	#
20130513_tam109	aldehyde dehydrogenase [Aspergillus oryzae RIB40]	gi%7c317145705	56873	88	13	2	0.05	MTPDGSRITEPDRDTPFLVYFVSSLTMADLFTTIETPSAKYEQPLGLFINNEFVKAKSGRTFETINPTNEKPIVAVQEADENDVEDAVKAARAAFEGEWSKVTPSERGRLLVKLADLFERDSDILAAIEALDNGKAFTMAKGDVAAAAGCLRYYGGWADKIHGQTIDTNPESLTYTRHEPIGVCGQIIPWNFPLLMWSWKIGPAIAAGNVVVLKTAEQTPLSGLYAAKLIKEAGFPAGVVNILSGFGRVAGAAISSHMDIDKIAFTGSTLVGRMILQAAAKSNLKKVTLELGGKSPNIVFDDADIDNAISWSNFGIFFNHGQCCCAGSRILVQEGIHDKFVARFKERAAANKLGNPFTADTFQGPQVSQLQFDRIMEYINHGKQEGATVATGGERHGTE…	6.5	VAGAAISSHMDIDK-ELGSYALENYTQVK-	#
20130513_tam109	Pc22g26880 [Penicillium chrysogenum Wisconsin 54-1255]	gi%7c255951564 gi%7c211593566	24423	81	13	2	0.11	MTTAEGAKKIIAEVSNHDLDQWVRTASFTSEIEESVRGHIHQELTSWLFFRKLAADCSRSNISLHGFARLWERSAAECLADFKWLEKYLVSRGGRSNPTGIEATTFEWPDNPIEPVGPCKEALFVEKSLLEDLERLCSLADKSGDIALSDAIQSKFMRKETRHVKNLADLLQQVVRASKQPGLGLYLLDRELRHTDGIVPWDSANDTSQQHDDTTAV	6.5	GHIHQELTSWLFFR-NLADLLQQVVR-	#
20130513_tam109	AraC family transcriptional regulator [Rhizobium etli CFN 42]	gi%7c86360366 gi%7c86284468	31405	80	13	2	0.02	MRTVSLPRGRQRLHAMPTSAGYEVRENETYDWDGRKRGQTPFTVLQHTISGSGRLRYLNRNYRLQGGDTLLVLVPHNHRYWLEKGERWEYFWISMNGEETLRIHQLVLSTAGPVLKLQPATIDHLADCSLRLVKGAASPGAASAIAYEAAMALYDDVFNSPAFAAELSLMQPVIDHINANLDKPLPVSELAAIVGLSRAHFSRSFAESEGVPPAEFVLQQRLQRAVKLLTKADFLPVKEVAIMCGFEDANYFSKVFRRVYGTNPTEFRTTGMYASIGRPK	6.5	RTVSLPR-TVSLPR-	#
20130513_tam109	pre-mRNA splicing factor (Srp1)_ putative [Neosartorya fischeri NRRL 181]	gi%7c119480467 gi%7c119408416	26976	83	12	2	0.08	MSRPGTTLYVTGFGHGTRARDLAYEFERYGRLVRCDIPAPRTPSSRLFAFVEYESRRDADDAYHEMHNKRIGRDDLLKIEWARTPPSASWRFESGRDRRRDRTPPRRGRSPSPRRSRGDYSPRRDERYERDYDRHDRDYDRRDRDYDRRDRDYDRRDRDRERSRDRSRSPDERDRDVKEDRERRDDERAPREEDRENGPNGEDRKAPLDPLTSAHDELDTAE	6	DLAYEFER-LFAFVEYESR-	#
20130513_tam109	hypothetical protein BC1G_10655 [Botryotinia fuckeliana B05.10]	gi%7c154301034	23369	83	12	2	0.08	MSRGGTTLYVTGFGAGIRARDLAYEFERYGRLVRCDIPAPRTAASRLFAFVEYESRRDADDAYHEMHNKRIGRDDLLKIEWARTPPSASWRFDTGEERAARRDGGRDSGRERGGGSRRSPRRRSTSPRRGRGDYSPRKDDRDRRDRDYDRRDRDRADRSRSPDDRDREVKEERDDAREPGANGDDRKGESTSFKLPLRPNL	6	DLAYEFER-LFAFVEYESR-	#
20130513_tam109	hypothetical protein SS1G_10587 [Sclerotinia sclerotiorum 1980]	gi%7c156043169 gi%7c154694975	23718	83	12	2	0.08	MSRGGTTLYVTGFGAGIRARDLAYEFERYGRLVRCDIPAPRTAASRLFAFVEYESRRDADDAYHEMHNKRIGRDDLLKIEWARTPPSASWRFDTGEDRPARRDGGRDSGRERGGGSRRSPRRRSNSPRRGRGDYTPRKDDRDRRDRDYDRRDRDRADRSRSPDDRDREIKEERDDTREPGANGDDRKVTMDSPPPAHDELDTAE	6	DLAYEFER-LFAFVEYESR-	#
20130513_tam109	hypothetical protein SNOG_09484 [Phaeosphaeria nodorum SN15]	gi%7c169612718 gi%7c160702568	25232	83	12	2	0.08	MSRGGGTTLYVTGFGHGTRARDLAYEFERYGRLVRCDIPAPRSASSRLFAFVEYESRRDADDAYHEMHNKRIGRDDLLKIEWARTPPSASWRFDSGRDRPRGERSERGERSERGGRERSPRRRSTSPRRDREAFSPRKDDRRERDYDRRDRDRSRSPNGDREMKDVRDREDDRGDRDRDERRERDREADAPAAEVRKAESPPPPVVHEDLDVAE	6	DLAYEFER-LFAFVEYESR-	#
20130513_tam109	predicted protein [Pyrenophora tritici-repentis Pt-1C-BFP]	gi%7c189210732 gi%7c187977790	26737	83	12	2	0.07	MSRGGGTTLYVTGFGHGTRARDLAYEFERYGRLVRCDIPAPRSASSRLFAFVEYESRRDADDAYHEMHNKRIGRDDLLKIEASLAVLDDWARTPPSASWRFDSGRDRPRGERSERGGDRGDRSDRGDRADRGVRSPRRRSPSPRRERGASPRKDERRDRDYDRRDRDRSRSPIDGDREMKDVRDREDDRGDRDRGDRDDRRDRDRAADPAGEVKTVESPPPPVHEDLDVAE	6	DLAYEFER-LFAFVEYESR-	#
20130513_tam109	pre-mRNA splicing factor (Srp1)_ putative [Talaromyces stipitatus ATCC 10500]	gi%7c242775878 gi%7c218722347	24652	83	12	2	0.08	MSRSGGTTLYVTGFGHGTRARDLAYEFERYGRLVRCDIPAPRTASSRLFAFVEYESRRDADDAYHEMHNKRIGRDDLLKIEWARTPPSASWRFDSGRDRRRDRTPPRRGRSPSPRRGRGDYSPRRDDRRDKDYDRRDRDRDRERERERDRDRSRSPDDRDRDLKEDRDRHEDRDRRDDERDTATNGDDRKALDPLPSGHDELDTAE	6	DLAYEFER-LFAFVEYESR-	#
20130513_tam109	hypothetical protein [Tuber melanosporum Mel28]	gi%7c296416089 gi%7c295633596	20896	83	12	2	0.09	MSGRGGTTLYVTGFSSGTRARDLAYEFERYGRLVRCDIPAPRTASSRLFAFVEYESRRDADDAYYEMHGRRIGRDDLLKIEWARTPPSASWRFDGGRDAPRGGARRGGSPRRGRSVSRGRDSPRRSERRGERDARSRSPGRKGDDDVRRPDDDRERSPLAANGDDAHHRKDSPLHDDLDTADLAD	6	DLAYEFER-LFAFVEYESR-	#
20130513_tam109	pre-mRNA splicing factor [Aspergillus kawachii IFO 4308]	gi%7c358369715	27133	83	12	2	0.08	MSRPGTTLYVTGFGHGTRARDLAYEFERYGRLVRCDIPAPRTPSSRLFAFVEYESRRDADDAYHEMHNKRIGRDDLLKIEWARTPPSASWRFDSGRDRRRDRTPPRRGRSPSPRRGRGDYSPRRDDRYERDYDRHDRDYDRRDRDYDRRDRDYDRRDRDRERSRDRSRSPDERDRDIKDERERRDDDRERREDERENIPNGEDRKVPLEPLTSAHDELDTAE	6	DLAYEFER-LFAFVEYESR-	#
20130513_tam109	hypothetical protein MYCGRDRAFT_60426 [Zymoseptoria tritici IPO323]	gi%7c398396452 gi%7c339471564	26673	83	12	2	0.07	MSRTGSTTLYVTGFGHGTRARDLAYEFERYGRLVRCDIPAPRTASSRLFAFVEYESRRDADDAYHEMHNKRIGRDDLLKIEWARTPPSASWRFDTGRDGERGAEPRGSDRGDRGSARGGGRGDDRGVRRDRSRGRGRSGSPPRARRAEDDRERDYDRGGDRRERRDRTRSPEDRDRDRKMEDRERDDDREREPREREYEQENGAANGEDRKEVKEEELPPAHDDLDTAE	6	DLAYEFER-LFAFVEYESR-	#
20130513_tam109	hypothetical protein AN5802.2 [Aspergillus nidulans FGSC A4]	gi%7c67539264 gi%7c40739121 gi%7c259480045	26792	83	12	2	0.08	MSRPGTTLYVTGFGHGTRARDLAYEFERYGRLVRCDIPAPRTPSSRLFAFVEYESRRDADDAYHEMHNKRIGRDDLLKIEWARTPPSASWRFDSGRDRRRDRTPPRRGRSPSPRRARGEYSPRRDDRYDRDYDRHDRDYERRDRDYDRRDRDYDRRDRDRSRDRSRSPDDRDRDVKEDRERRDDERERRDDERENGPNGEDRKVPLEPLTSAHDELDTAE	6	DLAYEFER-LFAFVEYESR-	#
20130513_tam109	40S ribosomal protein S2 [Ajellomyces capsulatus NAm1]	gi%7c154271999 gi%7c150408839 gi%7c225556379 gi%7c240276589 gi%7c325095365	28148	78	12	2	0.06	MADAPRGAARGGFGSRGDRAGERGRGRRGRRGPKSDEKEWQPVTKLGRLVKAGKISSMEQIYLHSLPIKEYQIVDFFLPKLKDEVMKIKPVQKQTRAGQRTRFKAIVVIGDSEGHVGLGIKTSKEVATAIRAAIIIAKLSVLPVRRGYWGSNLGEPHSLPTKESGKCGSVTVRLIPAPRGTGLVASPAVKRLLQLAGVQDIYTSSSGSTKTLENTLKATFVAVANTYGFLTPNLWKETKLIRSPLDEYADVLREGKKY	6	LSVLPVR-SPLDEYADVLR-	#
20130513_tam109	adenine phosphoribosyltransferase 1 [Aspergillus terreus NIH2624]	gi%7c115385362 gi%7c114196920	22902	71	12	2	0.09	MSQSIPPSQTPDAAAQVAGQSSSAASRTTELASLKVRLRGALRQFPDFPSPGILFEDILPIFADPTLHEALLRCLELHLLESYGGQKPDVIVGLEARGFLIGPSLALRLGASFVPVRKQGKLPGPCETQAYDKEYGQDFFQMQADSIKPGQKVIVVDDIIATGGSAYAAGQLINKMGGNLMGFVFILELDFLKGRDKLPAPVYTLLTGQEKKD	6	GFLIGPSLALR-LGASFVPVR-	#
20130513_tam109	hypothetical protein ATEG_04182 [Aspergillus terreus NIH2624]	gi%7c115391711 gi%7c114194284	52978	92	11	2	0.04	MPPKKAVVQEKVLLGRPGNNLKSGIVGLANVGKSTLFQAITKSSLGNPANFPYATIDPEEARVIVPDERFDWLCEHYKPKSQVPANLTVYDIAGLTRGASTGAGLGNAFLSHIRAVDAIFQVVRCFDDAEIIHVEGDVDPIRDLTIINEELRIKDIEFVEKALENLNKQTRRGGQSLEMKKLREEEATVAKVLQHLKDGNDVRKADWAPKEVETINPLMLLTAKPVVYLVNLSERDYIRQKNKYLPKVFEWIKTNSPGDPLIPISVSFEERLTRFETEEQALEECKNLNTKSALPKVITTMRQSLNLASFFTTGADEVRQWTIRKGIKAPAAAGVIHTDFEKTFIQAIVYNYATLREYGDEAAVKAAGKVMTKGKDYVVEDGDILLIKAGAARGDSYKH…	5.5	AVDAIFQVVR-DLTIINEELR-	#
20130513_tam109	Pc16g06210 [Penicillium chrysogenum Wisconsin 54-1255]	gi%7c255940376 gi%7c211585580	43722	92	11	2	0.05	MAPKKPQVQEKVLLGRPGNNLKSGIVGLANVGKSTLFQSITKSSLGNPANFPYATIDPEEARVIVPDERFDWLCQHYKPKSQVPANLTVYDIAGLTRGASTGAGLGNSFLSHIRAVDAIFQVVRCFDDAEIIHVEGDVDPCRDLTIINEELRIKDIEFVEKALELLSKQTRRGGQSLEMKKLKEEEATTAKILEFLKAGNDIRKGDWNPKEVEVINPLFLLTAKPVVYLVNLSERDYIRQKNKYLPKVFEWIKTNSPGDPILPVSAQFEERLTLMHDDAAAEAECKTLGTKSGLPKIITTMRQALNLGSFFTTGEDEVRQWTIRKGIKAPAAAGVIHTDFEKTFIQAIVYNYSSLREYGDENSIKAAGKIMTKGKDYVVEDGDIMLIKAGAAKH	5.5	AVDAIFQVVR-DLTIINEELR-	#
20130513_tam109	catalase [Aspergillus fumigatus]	gi%7c1843578	84498	81	9	2	0.02	MATKIAGGLHRAQEVLQNTSSKSKKLVDLERDTADAHTQQPLTTDHGVRVSNTDQWLRVTNDRRTGPSLLEDQIAREKIHRFDHERIPERVVHARGTGAFGNFKLKESIEDLTYAGVLTDTSRNTPVFVRFSTVQGSRGSADTVRDVRGFAVKFYTDEGNWDIVGNNIPVFFIQDAVKFPDFVHAVKPEPHNEVPQAQTAHNNFWDFVYLHPEATHMFMWAMSDRAIPRSYRMMQGFGVNTFALVNKEGKRHFVKFHWIPHLGVHSLVWDEALKLGGQDPDFHRKDLMEAIDNKAYPKWDFAIQVIPEEKQDDFEFDILDATKIWPENLVPLRVIGELELNRNVDEFFPQTEQVAFCTSHIVPGIDFTDDPLLQGRNFSYFDTQISRLGINWEELPINR…	4.5	TGPSLLEDQIAR-VIGELELNR-	#
20130513_tam109	glycerol-3-phosphate dehydrogenase_ mitochondrial [Aspergillus clavatus NRRL 1]	gi%7c121702229 gi%7c119397522	76942	94	8	2	0.03	MASRHSRKFLRPLLYTSAAAAAGAGVLYISYRPRNIPGSEAPAVPPPGYHEGKLVPPSFPTIKSRLDQIEDLKRSTSSKDDEYDLLVIGGGATGSGIALDAATRGLKVAVVERDDFSAGTSSKSTKLVHGGVRYLEKAVWELDYNQYKLVKEALRERKYFLNTAPHLSSWLPIMVPVQKWWQAPYFWAGTKAYDWLAGSEGIESSYFLTKSKAVDAFPMLRKDNIFGAMVYYDGAHNDSRMNVSLAMTAALYGGTVVNHMQVTGLTKDASGKLNGARVKDLIPGKNGQEAEEITIKAKGIINATGPFTDSIRKMDEPSVKEIVAPSAGVHVILPGYYSPSNMGLIDPSTSDGRVIFFLPWQGNTIAGTTDQPTEITTQPEPSEKDINWILSEVRGYLAP…	4	TDVLAAWSGIRPLVR-ISALYPFIDGEIR-	#
20130513_tam109	60S ribosomal protein L4 [Aspergillus terreus NIH2624]	gi%7c115437794 gi%7c114188716	40169	89	7	2	0.09	MASRPTVTIATAEGKASGATLPLPAVFTAPIRPDIVQQVHTGMAKNKRQPYAVSEKAGEQTSAESWGTGRAVARIPRVSGGGTHRAGQAAFGNQCRSGRMFAPTKVWRKWHQKVNVGQRRFATASALAASSVPALLFARGHRVANIPEVPLVVDSKTFEGAAVTKTKAAIALLQALGAGSELVKVQKSRKMRAGKGKLRNRRFRQRRGPLVVYNPEVDGKELVRAFRNIPGVETSSVFSLNLLQLAPGGHLGRFIVWSSAAFQALDQVYGSTTTPAALKKDYTLPQNVVANADLARLINSSEIQSVLRAPKGEARTKRGNVQKKNPLRNKQVMLRLNPYAAAFSKEKLGQKSLEQGKPEAASKEFLNTLYEA	3.5	FATASALAASSVPALLFAR-AAIALLQALGAGSELVK-	#
20130513_tam109	glutamate decarboxylase [Aspergillus clavatus NRRL 1]	gi%7c121700276 gi%7c119396545	63165	73	4	2	0.03	MVHLAKVHHDEEEPNPIVSRVDSIKLDTVDDDGFYSTVYGTRFAAEQLPQTEMPEKEMPREVAYRMIKDELSLDGNPMLKYVLFLWRLISEEEAEKLMTDSFSKNFIDYEEYPQSAEIQNRCVNMIARLFNAPVSKEEDRPIGTSTIGSSEAIMLGTLAMKRRWQNKRKAEGKDYSRPNIVMNSAVQVCWEKAARYFDIEERYVYCTADRYVIDPQQAVDLIDENTIGICAILGTTYTGEYEDVKAINDLLVERDLDVPIHVDAASGGFVAPFINPSLQWDFRLEKVVSINVSGHKYGLVYPGVGWVVWRSPEFLPKELIFNINYLGAEQASFTLNFSKGASQVIGQYYQMIRLGKRGYRSIMVNITRIADYLAEQLEKLGFIILSQRRGHGLPLVAFR…	2	YFDIEER-GASQVIGQYYQMIR-	#
	Sample 3#
	32mg
	Animal hemoglobin
20130523_tam169	hemoglobin subunit beta [various ruminants, Sus scrofa]	gi%7c27819608 gi%7c358420687 gi%7c122572 gi%7c576143 gi%7c576145 gi%7c12084213 gi%7c12084215 gi%7c12084217 gi%7c12084219 gi%7c12084221 gi%7c12084223 gi%7c14488449 gi%7c14488451 gi%7c183448353 gi%7c183448355 gi%7c197724898 gi%7c197724900 gi%7c197724902 gi%7c197724904 gi%7c312597547 gi%7c312597549 gi%7c312597551 gi%7c312597553 gi%7c312597555 gi%7c312597557 gi%7c395 gi%7c162741 gi%7c294459579 gi%7c2…	15944	94	9	2	0.15	MLTAEEKAAVTAFWGKVKVDEVGGEALGRLLVVYPWTQRFFESFGDLSTADAVMNNPKVKAHGKKVLDSFSNGMKHLDDLKGTFAALSELHCDKLHVDPENFKLLGNVLVVVLARNFGKEFTPVLQADFQKVVAGVANALAHRYH	4.5	VDEVGGEALGR-LLGNVLVVVLAR-	#
	Sample 4#
	20.7mg
	Sesame storage protein
20140324-tam-191-2c	11S globulin seed storage protein 2 {Sesamum indicum]	gi%7c75315270 gi%7c5381325	51798	144	23	4	0.07	MVAFKFLLALSLSLLVSAAIAQTREPRLTQGQQCRFQRISGAQPSLRIQSEGGTTELWDERQEQFQCAGIVAMRSTIRPNGLSLPNYHPSPRLVYIERGQGLISIMVPGCAETYQVHRSQRTMERTEASEQQDRGSVRDLHQKVHRLRQGDIVAIPSGAAHWCYNDGSEDLVAVSINDVNHLSNQLDQKFRAFYLAGGVPRSGEQEQQARQTFHNIFRAFDAELLSEAFNVPQETIRRMQSEEEERGLIVMARERMTFVRPDEEEGEQEHRGRQLDNGLEETFCTMKFRTNVESRREADIFSRQAGRVHVVDRNKLPILKYMDLSAEKGNLYSNALVSPDWSMTGHTIVYVTRGDAQVQVVDHNGQALMNDRVNQGEMFVVPQYYTSTARAGNNGFEWV…	5.75	ISGAQPSLR-LVYIER-AFYLAGGVPR-SPLAGYTSVIR-	#
	Mold
20140324-tam-191-2c	hypothetical protein PDE_06476 [Penicillium oxalicum 114-2]	gi%7c525585271	60052	419	70	11	0.21	MFRNALRQSSRSVAAVSATGRVASVRAAVPGPLAGASKQVRSYAAEAKAQPTEVSSILEQRIRGVQEEAGLAETGRVLSVGDGIARVHGMTNVQAEELVEFASGVKGMCMNLEAGQVGVVLFGSDRLVKEGETVKRTGEIVDVPVGPELLGRVVDGLGNPIDGKGPLNAKEKRRSQLKAPGILPRQSVNQPVQTGMKCVDSMVPIGRGQRELIIGDRQTGKTAVALDTMLNQKRWNNTGDESKKLYCIYVAVGQKRSTVAQLVKTLEEQDAMKYSIVVAATASEAAPLQYLAPFTGCAMGEWFRDNGRHAVIIYDDLSKQAVAYRQMSLLLRRPPGREAYPGDVFYLHSRLLERAAKMNNKTHGGGSLTALPIIETQGGDVSAYIPTNVISITDGQIFL…	6.36364	GVQEEAGLAETGR-VLSVGDGIAR-TGEIVDVPVGPELLGR-QSVNQPVQTGMK-ELIIGDRQTGK-STVAQLVK-HAVIIYDDLSK-QMSLLLR-EAYPGDVFYLHSR-GIRPAINVGLSVSR-LFLAQYR-	#
20140324-tam-191-2c	Translation elongation factor EF-2 subunit_ putative [Penicillium digitatum Pd1]	gi%7c425767905 gi%7c425769718	93801	329	80	10	0.11	MVNFTIEEIRTLMDRRANIRNMSVIAHVDHGKSTLSDSLVQRAGIISAAKAGEARFMDTRPDEQDRCITIKSTAISLYAKFPDPEDLKEIPQAVDGDEFLINLIDSPGHVDFSSEVTAALRVTDGALVVVDCVSGVCVQTETVLRQALTERIKPVLCINKVDRALLELQVSKEDLYQSFSRTIESVNVIISTYFDKALGDVQVYPDRGTIAFGSGLHGWCFTVRQFAVRYAKKFGVDRKKMLERLWGDNYFNPKTKKWTNKSEYEGKTLERAFNQFILDPIFKIFAAVNHNKRDEIFTLLEKLEVSLTNDEKELEGKALLKLVMRKFLPAADALLEMICIHLPSPVTAQKYRAETLYEGPTDDKACIGIRDCDPTAPLMLYVSKMVPTSDKGRFYAFGR…	8	VNFTIEEIR-STLSDSLVQR-STAISLYAK-ALGDVQVYPDR-AFNQFILDPIFK-FYAFGR-TILMMGR-FSVSPVVQR-EGPVAEEPMR-GGGQIIPTAR-	#
20140324-tam-191-2c	hypothetical protein PDE_05675 [Penicillium oxalicum 114-2]	gi%7c525584473	96455	469	95	9	0.11	MSELRFDNQTVVVTGAGGGLGKAYALFFASRGANVVVNDLGGSHSGEGKSSKAADVVVEEIRAAGGKAVANYDSVENGDAIIETAIKNFGRIDVLINNAGILRDISFKNMKDSDWDLINQVHTYGAYKCARAAWPHFRKQKYGRVINTASAAGLFGSFGQANYSAAKLGQVGFTETLAKEGAKYNIIANVIAPIAASRMTATVMPPDVLENLKPEWVVPLVATLVHSSNTTESGGIYEVGGGHVAKLRWERAKGALLKTDHSLTPGAIAAKWNDVNDFSKPEHPTGPADFMGLLEEAVKLPSAPQAQEPDFKGRVALVTGGGAGLGRAYCLLFAKHGAKVVVNDLMDPEPVVQEIRKMGGEAVGNKASCEDGDAVIKSAIDAFGRIDILVNNAGILRDK…	10.5556	AYALFFASR-AADVVVEEIR-IDVLINNAGILR-LGQVGFTETLAK-YNIIANVIAPIAASR-VALVTGGGAGLGR-IDILVNNAGILR-LGILGLSR-TSEDQAALYR-	#
20140324-tam-191-2c	ADP/ATP carrier protein [Byssochlamys spectabilis No. 5]	gi%7c557723494	34277	479	162	8	0.27	MAKGEVNQAEKSVFGMPGFVVDFLMGGVSAAVSKTAAAPIERIKLLIQNQDEMLKAGRLDRKYDGIVDCFRRTAASEGVVSLWRGNTANVIRYFPTQALNFAFRDTYKSMFAFKKDRDGYWKWMAGNLASGGAAGATSLLFVYSLDYARTRLANDAKSAKGGGDRQFNGLVDVYKKTLASDGIAGLYRGFGPSVLGIVVYRGLYFGMYDSIKPVLLVGPLEGSFLASFLLGWTVTTGAGIASYPLDTIRRRMMMTSGEAVKYSSSLDAARQIAAKEGVKSFFKGAGANILRGVAGAGVLSIYDQVQLLLFGKKFKGGSG	20.25	LLIQNQDEMLK-TAASEGVVSLWR-YFPTQALNFAFR-TLASDGIAGLYR-GFGPSVLGIVVYR-MMMTSGEAVK-YSSSLDAAR-GAGANILR-	#
20140324-tam-191-2c	hypothetical protein PDE_01674 [Penicillium oxalicum 114-2]	gi%7c525580485	109231	361	158	8	0.06	MAERRISYAPDVENGDRHRDAGDVNDGSLDEYSALNRYISTARDGRRGSTSSAAALSTKQKKKPFWKFWAKEGDGVVEGWQCPDEWLETDLRSGLSSSDIEPRRKKCGWNELVTEKTNIFVQFIGYFRGPILYVMELAVLLAAGLRDWIDLGVIIGILMLNALVGWYQEKQAADVVASLKGDIAMRAIVVRNGQEEEILARELVTGDIVVVEEGHVIPADVRLICDYSKPEMFEAYKEYLISSQDDTLKEKAEDDDEDSREVHQGVSLIACDQSAITGESLAVDKYMADTCYYTTGCKRGKAYGIVTATARQSFVGKTAALVQGAKDSGHFKAVMDNIGTSLLVLVMFWILAAWIGGFFRHLGIATPENSENTLLRYTLILLIIGVPVGLPVVTTTTLA…	19.75	QAADVVASLK-AIVVRNGQEEEILAR-NGQEEEILAR-AYGIVTATAR-VTILTLR-MLTGDAIAIAK-MKAYIQYR-AYIQYR-	#
20140324-tam-191-2c	ATP synthase beta chain_ mitochondrial precursor [Aspergillus terreus NIH2624]	gi%7c115401284 gi%7c114190171	53649	401	97	8	0.21	MFKSGLARTFGRAAFARPSVARRALPSKLNGLPSLARFASTDSSVGKIHQVIGAVVDVKFEGEKLPAILNAIETENNGQKLVLEVSQHLGENVVRTIAMDGTEGLTRGAAARDTGAPITIPVGPGTLGRILNVTGDPIDERGPVKATTYLPIHTEAPPFTEQSTEAEILVTGIKVVDLLAPYARGGKIGLFGGAGVGKTVFIQELINNIAKAHGGYSVFCGVGERTREGNDLYHEMQETGVIQLDGESKVSLVFGQMNEPPGARARVALTGLTIAEYFRDQEGQDVLLFIDNIFRFTQAGSEVSALLGRIPSAVGYQPTLAVDMGGMQERITTTTKGSITSVQAVYVPADDLTDPAPATTFAHLDATTVLSRGISELGIYPAVDPLDSKSRMLDARIVG…	12.125	TIAMDGTEGLTR-DTGAPITIPVGPGTLGR-ILNVTGDPIDER-VVDLLAPYAR-IGLFGGAGVGK-VALTGLTIAEYFR-FTQAGSEVSALLGR-GISELGIYPAVDPLDSK-	#
20140324-tam-191-2c	cell division cycle protein 48 [Aspergillus terreus NIH2624]	gi%7c115385577 gi%7c114187782	90410	202	48	8	0.09	MSSEPDHTHDKKRVNLQDASGAEKKEELDTSTAILKKKKKPNSLIVTDAVNDDNSVIALSNNTMDTLQLFRGDTVLVKGKKRKDTVLIVLADDDLDDGSARINRVVRHNLRVKHGDIITVHPCPDIKYAKRIAVLPIADTVEGLTGSLFDVYLAPYFREAYRPVRQGDLFTVRGGMRQVEFKVVEVDPPEYGIVAQDTIIHCEGEPIQREDEEGNLNEVGYDDIGGCRKQMAQIRELVELPLRHPQLFKSIGIKPPRGILMYGPPGTGKTLMARAVANETGAFFFLINGPEIMSKMAGESESNLRKAFEEAEKNSPAIIFIDEIDSIAPKREKTNGEVERRVVSQLLTLMDGMKARSNVVVMAATNRPNSIDPALRRFGRFDREVDIGIPDPTGRLEIL…	6	QGDLFTVR-ELVELPLR-GILMYGPPGTGK-EVDIGIPDPTGR-YALGVSNPSALR-EVAVVEVPNVR-FGLSPSR-GVLFYGPPGTGK-	#
20140324-tam-191-2c	cell division control protein Cdc48 [Neosartorya fischeri NRRL 181]	gi%7c119482299 gi%7c119409332	90134	202	48	8	0.1	MSAEPDHAHDKKRVHLHDASGAEKKEELDTSTAILKKKKKPNSLIVTDAVNDDNSVIALSNNTMETLQLFRGDTVLVKGKKRKDTVLIVLADDDLDDGSARINRVVRHNLRVKHGDIITVHPCPDIKYAKRIAVLPIADTVEGLTGSLFDVYLAPYFREAYRPVKQGDLFTVRGGMRQVEFKVVEVDPPEYGIVAQDTIIHCEGEPIQREDEEGNLNEVGYDDIGGCRKQMAQIRELVELPLRHPQLFKSIGIKPPRGILMYGPPGTGKTLMARAVANETGAFFFLINGPEIMSKMAGESESNLRKAFEEAEKNSPAIIFIDEIDSIAPKREKTNGEVERRVVSQLLTLMDGMKARSNVVVMAATNRPNSIDPALRRFGRFDREVDIGIPDPTGRLEIL…	6	QGDLFTVR-ELVELPLR-GILMYGPPGTGK-EVDIGIPDPTGR-YALGVSNPSALR-EVAVVEVPNVR-FGLSPSR-GVLFYGPPGTGK-	#
20140324-tam-191-2c	hypothetical protein AN7254.2 [Aspergillus nidulans FGSC A4]	gi%7c67900534 gi%7c40741970	90682	202	48	8	0.09	MCCWGGSRSGTLNLCVNSRRVYVADASGAEKKEELDTSTAILKKKKKPNSLIVTDAVNDDNSTISLSNNTMDTLGLFRGDTVTVRGKKRKETVLIVLADDDLDDGSARINRVVRHNLRVKHGDIITVHPCPDIKYAKRIAVLPIADTVEGLTGSLFDVYLAPYFRDGYRPVKQGDLFTVRGGMRQVEFKVVEVDPPEFGIVAPDTIIHSEGEPIQREDEENNLNEVGYDDIGGCRKQMAQIRELVELPLRHPQLFKSIGIKPPRGILMYGPPGTGKTLMARAVANETGAFFFLINGPEIMSKMAGESESNLRKAFEEAEKNSPAIIFIDEIDSIAPKREKTNGEVERRVVSQLLTLMDGMKARSNVVVMAATNRPNSIDPALRRFGRFDREVDIGIPDP…	6	QGDLFTVR-ELVELPLR-GILMYGPPGTGK-EVDIGIPDPTGR-YALGVSNPSALR-EVAVVEVPNVR-FGLSPSR-GVLFYGPPGTGK-	#
20140324-tam-191-2c	cell division control protein Cdc48 [Aspergillus fumigatus Af293]	gi%7c71002728 gi%7c28394450 gi%7c66853683 gi%7c159130099	90162	202	48	8	0.1	MSAEPDHAHDKKRVHLHDASGAEKKEELDTSTAILKKKKKPNSLIVTDAVNDDNSVIALSNNTMETLQLFRGDTVLVKGKKRKDTVLIVLADDDLDDGSARINRVVRHNLRVKHGDIITVHPCPDIKYAKRIAVLPIADTVEGLTGSLFDVYLAPYFREAYRPVKQGDLFTVRGGMRQVEFKVVEVDPPEYGIVAQDTIIHCEGEPIQREDEEGNLNEVGYDDIGGCRKQMAQIRELVELPLRHPQLFKSIGIKPPRGILMYGPPGTGKTLMARAVANETGAFFFLINGPEIMSKMAGESESNLRKAFEEAEKNSPAIIFIDEIDSIAPKREKTNGEVERRVVSQLLTLMDGMKARSNVVVMAATNRPNSIDPALRRFGRFDREVDIGIPDPTGRLEIL…	6	QGDLFTVR-ELVELPLR-GILMYGPPGTGK-EVDIGIPDPTGR-YALGVSNPSALR-EVAVVEVPNVR-FGLSPSR-GVLFYGPPGTGK-	#
20140324-tam-191-2c	hypothetical protein AN7111.2 [Aspergillus nidulans FGSC A4]	gi%7c67541895 gi%7c40742126	94462	360	84	7	0.09	MSELRFDNQTVVVTGAGGGLGKAYALFFASRGANVVVNDLGGSHQGEGKSSKAADVVVDEIRAAGGKAVANYDSVENGDAIIDTAIKNFGRVDVLINNAGILRDEPVLRRSTDERLISQCARAAWPHFRKQKYGRIINTASAAGLFGNFGQANYAAAKLGQVGFTETLAKEGAKYNIIANVIAPIAASRMTATVMPPEVLELLKPEWVVPVVAVLVHSSNTTESGSIFEIGGGHVAKLRWERSKGALLKTDASLTPGAIARKWNEVNDFSKPDYPTGPADFMGLLEDGLKLPPAPSGPEPEFKGKVALVTGGGNGLGAKVVVNDLVDPEPVVQEIKKAGGEAVGNKASCEDGAAVVKTAIDTYGRIDILVNNAGILRDKAFTNMNDDLWNPVVNIHLRG…	12	AYALFFASR-VDVLINNAGILR-LGQVGFTETLAK-YNIIANVIAPIAASR-IDILVNNAGILR-TSEDQAALYR-FAGVVLPGQTLR-	#
20140324-tam-191-2c	tubulin beta_ putative [Talaromyces stipitatus ATCC 10500]	gi%7c242768278 gi%7c218724732	49724	281	63	6	0.15	MREIVHLQTGQCGNQIGAAFWQIISAEHGLDGSGVYNGSSDLQLERMNVYFNEASGNKYVPRAVLVDLEPGTMDAVRAGPFGQLFRPDNFVFGQSGAGNNWAKGHYTEGAELVDQVVDVVRREAEACDCLQGFQITHSLGGGTGAGMGTLLISKIREEFPDRMMATFSVVPSPKVSDTVVEPYNATLSVHQLVEHSDETFCIDNEALYDICTRTLKLSSPSYGDLNHLVSTVMSGVTTSLRFPGQLNSDLRKLAVNMVPFPRLHFFMVGFAPLTSRGSYSFRAVTVPELTQQMYDPKNMMAASDFRNGRYLTCSALFRGKVSMKEVEDQMRNVQNKNSSYFVEWIPNNVQTALCSVPPRGLKMAATFVGNSTAIQELFKRIGDQFTAMFRRKAFLHWYT…	10.5	AVLVDLEPGTMDAVR-MMATFSVVPSPK-LAVNMVPFPR-LHFFMVGFAPLTSR-NMMAASDFR-IGDQFTAMFR-	#
20140324-tam-191-2c	hypothetical protein PDE_00677 [Penicillium oxalicum 114-2]	gi%7c525579491	49984	281	63	6	0.15	MREIVHLQTGQCGNQIGAAFWQTIAGEHGLDGDGHYNGSSDLQLERMNVYFTHASGDKYVPRAVLVDLEPGTMDAVRAGPFGKLFRPDNFVFGQSGAGNNWAKGHYTEGAELVDQVIDVVRREAEACDCLQGFQITHSLGGGTGAGMGTLLISKIREEFPDRMMATFSVVPSPKVSDTVVEPYNATLSVHQLVEHSDETFCIDNEALYDICMRTLKLSSPSYGDLNHLVSAVMSGVTTSLRFPGQLNSDLRKLAVNMVPFPRLHFFMVGFAPLTSRGAYQYRQVSVPELTQQMFDPKNMMAASDFRNGRYLTCSALFRGQVSMKEVEDQMRNIQNKNSSYFVEWIPNNVQTALCSVPPRGLRMSSTFVGNSTSIQELFKRIGDQFTAMFRRKAFLHWYT…	10.5	AVLVDLEPGTMDAVR-MMATFSVVPSPK-LAVNMVPFPR-LHFFMVGFAPLTSR-NMMAASDFR-IGDQFTAMFR-	#
20140324-tam-191-2c	hypothetical protein PDE_01576 [Penicillium oxalicum 114-2]	gi%7c525580388	64341	258	61	6	0.09	MANAPHGGVLKDLLARDAPRHDELAAEAETLPAIVLSERQLCDLELIMNGGFSPLEGFMNQADYDRVCQDCRLADGNVFSMPITLDVTQQIVDENKLKAGARVTLRDFRDDRNLAILTIDDIYRPDKKKEGELVFGGDPEHPAIVYLNETIKDLYIGGKVEAVNKLNHYDYVGLRYTPAELRVHFDKLGWSRVVAFQTRNPMHRAHRELTVRAARSRQANVLIHPVVGLTKPGDIDHFTRVRAYQALLPRYPNGMAVLGLLGLAMRMGGPREAIWHAIIRKNHGATHFIVGRDHAGPGKNSKGVDFYGPYDAQHAVEKYKDELGIEVVEFQMVTYLPDTDEYRPVDQVPEGVKTLNISGTELRRRLRTGAHIPEWFSYPEVVKILRESNPPRASQGFTI…	10.1667	VVAFQTR-AYQALLPR-EAIWHAIIR-ALQVTLNQQGGR-SVSLLLGDTVR-IAFVASELTR-	#
20140324-tam-191-2c	hypothetical protein AN6717.2 [Aspergillus nidulans FGSC A4]	gi%7c67541094 gi%7c40739345	37725	268	59	6	0.18	MFAARQSFGFLQKRAFSASASQASKVAVLGASGGIGQPLSLLLKLNPRVSELALYDIRGGPGVAADISHINTNSTVKGYEPTESGLADALKGSEIVLIPAGVPRKPGMTRDGKEDDCENLRIGTDLLMTDLFNTNASIVRDLAKAAAKASPEANILVISNPVNSTVPIVSEVFKAAGVYNPKRLFGVTTLDVVRASRFISQVQGTDPSKEAVPVVGGHSGVTIVPLLSQSNHPNIDGKTRDELVHRIQFGGDEVVKAKDGAGSATLSMAMAGARFAESLLRAAQGEKGVVEPTFVESPLYKDQGVNFFASKVELGPNGAEKINPVGEVNEFEQKLLEACLVDLKKNIQKGIDFVKANP	9.83333	VSELALYDIR-LFGVTTLDVVR-IQFGGDEVVK-AKDGAGSATLSMAMAGAR-FAESLLR-VELGPNGAEK-	#
20140324-tam-191-2c	elongation factor 1-alpha [Aspergillus niger CBS 513.88]	gi%7c145255366 gi%7c317037311 gi%7c134084533	49926	254	44	6	0.13	MGKEDKTHINIVVIGHVDSGKSTTTGHLIYKCGGIDQRTIEKFEKEAAELGKGSFKYAWVLDKLKSERERGITIDIALWKFQTGKYEVTVIDAPGHRDFIKNMITGTSQADCAILIIASGTGEFEAGISKDGQTREHALLAFTLGVRQLIVALNKMDTCKWSEDRYNEIVKETSNFIKKVGYNPKGVPFVPISGFNGDNMLEPSPNCPWYKGWEKETKAGKVTGKTLLEAIDAIEPPVRPSNKPLRLPLQDVYKISGIGTVPVGRVETGIIAPGMVVTFAPANVTTEVKSVEMHHQQLKEGVPGDNVGFNVKNVSVKEVRRGNVAGDSKNDPPLGCESFTAQVIVLNHPGQVGAGYAPVLDCHTAHIACKFAELLEKIDRRTGKSVESSPKFIKSGDAA…	7.33333	STTTGHLIYK-GITIDIALWK-EHALLAFTLGVR-LPLQDVYK-ISGIGTVPVGR-QTVAVGVIK-	#
20140324-tam-191-2c	translation elongation factor 1-alpha [Ajellomyces capsulatus NAm1]	gi%7c154271245 gi%7c150409699	50166	254	44	6	0.13	MGKEDKTHINLVVIGHVDSGKSTTTGHLIYKCGGIDSRTIEKFEKEAEELGKKSFKYAWVLDKLKSERERGITIDIALWKFETPKYSVTVIDAPGHRDFIKNMITGTSQADCAILIIAAGTGEFEAGISKDGQTREHALLAFTLGVRQLIVAINKMDTTKWSESRFNEIIKEVSNFIKKVGYNPKAVPFVPISGFEGDNMIEPSPNCAWYKGWNKETASGKSSGKTLLDAIDAIEPPTRPTDKPLRLPLQDVYKISGIGTVPVGRVETGVIKPGMVVTFAPSNVTTEVKSVEMHHQQLQAGYPGDNVGFNVKNVSVKEVRRGNVAGDSKNDPPKGCESFNAQVIVLNHPGQVGAGYAPVLDCHTAHIACKFSELIEKIDRRTGKSVENNPKFIKSGDAA…	7.33333	STTTGHLIYK-GITIDIALWK-EHALLAFTLGVR-LPLQDVYK-ISGIGTVPVGR-QTVAVGVIK-	#
20140324-tam-191-2c	elongation factor 1 alpha [Ajellomyces capsulatus H143]	gi%7c240273585	45436	254	44	6	0.14	MGKEDKTHINLVVIGHVDSGKSTTTGHLIYKCGGIDSRTIEKFEKEAEELGKKSFKYAWVLDKLKSERERGITIDIALWKFETPKYSVTVIDAPGHRDFIKNMITGTSQADCAILIIAAGTGEFEAGISKDGQTREHALLAFTLGVRQLIVAINKMDTTKWSESRFNEIIKEVSNFIKKGDNMIEPSPNCTWYKGWNKETASGKSSGKTLLDAIDAIEPPTRPTDKPLRLPLQDVYKISGIGTVPVGRVETGVIKPGMVVTFAPSNVTTEVKSVEMHHQQLQAGYPGDNVGFNVKNVSVKEVRRGNVGAGYAPVLDCHTAHIACKFSELIEKIDRRTGKSVENNPKFIKSGDAAIVKMVPSKPMCVEAFTDYPPLGRFAVRDMRQTVAVGVIKSVVKSD…	7.33333	STTTGHLIYK-GITIDIALWK-EHALLAFTLGVR-LPLQDVYK-ISGIGTVPVGR-QTVAVGVIK-	#
20140324-tam-191-2c	hypothetical protein PDE_02596 [Penicillium oxalicum 114-2]	gi%7c525581402	49766	254	44	6	0.13	MGKDDKLHINIVVIGHVDSGKSTTTGHLIYKCGGIDSRTIEKFEKEAAELGKGSFKYAWVLDKLKAERERGITIDIALWKFQTAKYEVTVIDAPGHRDFIKNMITGTSQADCAILIIASGTGEFEAGISKDGQTREHALLAFTLGVRQLIVALNKMDTCKWSEDRYNEIVKETSNFIKKVGYNPKSVPFVPISGFNGDNMLEPSPNCPWYKGWEKETKAGKTTGKTLLEAIDAIEPPVRPSNKPLRLPLQDVYKISGIGTVPVGRVETGIIAPGMVVTFAPANVTTEVKSVEMHHTQLKEGVPGDNVGFNVKNVSVKEVRRGNVASDSKNDPAAAAASFNAQVIVLNHPGQVGAGYAPVLDCHTAHIACKFSELLEKIDRRTGKSVEDHPKFIKSGDAA…	7.33333	STTTGHLIYK-GITIDIALWK-EHALLAFTLGVR-LPLQDVYK-ISGIGTVPVGR-QTVAVGVIK-	#
20140324-tam-191-2c	elongation factor 1-alpha [Byssochlamys spectabilis No. 5]	gi%7c557724787	49958	254	44	6	0.13	MGKEEKSHINIVVIGHVDSGKSTTTGHLIYKCGGIDQRTIEKFEKEATELGKGSFKYAWVLDKLKAERERGITIDIALWKFQTSKYEVTVIDAPGHRDFIKNMITGTSQADCAILIIASGTGEFEAGISKDGQTREHALLAFTLGVRQLIVALNKMDTAKWSQDRYNEIVKETSNFIKKVGYNPKGVPFVPISGFHGDNMLEPSPNCPWYKGWEKETKAGKVTGKTLLEAIDAIEPPVRPSNKPLRLPLQDVYKISGIGTVPVGRVETGIIAPGMVVTFAPSNVTTEVKSVEMHHQQLKEGVPGDNVGFNVKNVSVKEVRRGNVAGDSKNDPPMGAASFNAQVIVLNHPGQISAGYAPVLDCHTAHIACKFSELLEKIDRRTGKSVEDHPKFIKSGDAA…	7.33333	STTTGHLIYK-GITIDIALWK-EHALLAFTLGVR-LPLQDVYK-ISGIGTVPVGR-QTVAVGVIK-	#
20140324-tam-191-2c	unnamed protein product [Aspergillus oryzae RIB40]	gi%7c83772582	51047	254	44	6	0.12	MADKYFPPYSKEDKQHINIVVIGHVDSGKSTTTGHLIYKCGGIDQRTIEKFEKEAAELGKGSFKYAWVLDKLKSERERGITIDIALWKFQTSKYEVTVIDAPGHRDFIKNMITGTSQADCAILIIASGTGEFEAGISKDGQTREHALLAFTLGVRQLIVALNKMDTCKWSQDRYNEIVKETSNFIKKVGYNPKSVPFVPISGFNGDNMIEASTNCPWYKGWEKETKAGKSTGKTLLEAIDAIEPPVRPTDKPLRLPLQDVYKISGIGTVPVGRVETGVIKPGMVVTFAPANVTTEVKSVEMHHQQLQAGNPGDNVGFNVKNVSVKEVRRGNVAGDSKNDPPAGCDSFNAQVIVLNHPGQVGNGYAPVLDCHTAHIACKFAELLEKIDRRTGKSVEDKPK…	7.33333	STTTGHLIYK-GITIDIALWK-EHALLAFTLGVR-LPLQDVYK-ISGIGTVPVGR-QTVAVGVIK-	#
20140324-tam-191-2c	40S ribosomal protein S3 [Aspergillus clavatus NRRL 1]	gi%7c121702671 gi%7c119397743	29252	190	39	5	0.17	MAAVQGAISKRRKFVADGVFYAELNEFFQRELAEEGYSGVEVRVTPTVTDIIIRATHTQEVLGEQGRRIRELTSLIQKRFKFPENSVSLYAAKVQNRGLSAVAQCESLRYKLLNGLAVRRACYGVLRFIMESGAKGCEVVVSGKLRAARAKSMKFTDGFMIHSGQPAKEFIDSATRHVLLRQGVLGIKVKIMRGSDPEGKAGPQKTLPDSVTIIEPKEEQPVLQPMSQDYGAKALAAQQAAEQQRLAEQQAAEGQEAAPAAEGYAQE	7.8	ELAEEGYSGVEVR-VTPTVTDIIIR-ATHTQEVLGEQGR-ATHTQEVLGEQGRR-EFIDSATR-	#
20140324-tam-191-2c	40S ribosomal protein S3 [Aspergillus niger CBS 513.88]	gi%7c145254885 gi%7c134084376 gi%7c350630615 gi%7c358366728	29169	190	39	5	0.17	MAAVQGAISKRRKFVADGVFYAELNEFFQRELAEEGYSGVEVRVTPTVTDIIIRATHTQEVLGEQGRRIRELTSLIQKRFKFPENSVSLYAAKVQNRGLSAVAQCESLRYKLLNGLAVRRACYGVLRFIMESGAKGCEVVVSGKLRAARAKSMKFTDGFMIHSGQPAKEFIDSATRHVLLRQGVLGIKVKIMRGSDPEGKAGPQKTLPDAVTIIEPKEEQPVLQPMSQDYGAKALAAQQAAEQQRLAEQQATEAQEGAGAEAYAQE	7.8	ELAEEGYSGVEVR-VTPTVTDIIIR-ATHTQEVLGEQGR-ATHTQEVLGEQGRR-EFIDSATR-	#
20140324-tam-191-2c	40S ribosomal protein S3 [Talaromyces marneffei ATCC 18224]	gi%7c212527956 gi%7c210073533	29236	190	39	5	0.17	MAATQGAISKRRKFVADGVFYAELNEFFQRELAEEGYSGVEVRVTPTVTDIIIRATHTQEVLGEQGRRIRELTSLIQKRFKFPENSVSLYAAKVQNRGLSAVAQCESLRYKLLNGLAVRRACYGVLRFIMESGAKGCEVVVSGKLRAARAKSMKFTDGFMIHSGQPAKEFIDSATRHVLLRQGVLGIKVKIMRGSDPEGKSGPQKTLPDAVTIIEPKEEQPILQPVSQDYGAKALAAQQLAEQQRLAEQQEAEGAEGAAPAEYVQE	7.8	ELAEEGYSGVEVR-VTPTVTDIIIR-ATHTQEVLGEQGR-ATHTQEVLGEQGRR-EFIDSATR-	#
20140324-tam-191-2c	40S ribosomal protein S3 [Endocarpon pusillum]	gi%7c335345828	28873	190	39	5	0.17	MATAQGAISKRRKFVADGVFYAELNEFFQRELAEEGYSGVEVRVTPTVTDIIIRATHTQEVLGEQGRRIRELTSLIQKRFKFPENSVSLYAAKVQNRGLSAVAQCESLRYKLLNGLAVRRACYGVLRFIMESGAKGCEVVVSGKLRAARAKSMKFTDGFMIHSGQPAKEFIDSATRHVFLRQGVLGIKVKIMRGSDPEGKSGPQKSFPDSVTIIEPKEEQPVVQPMSQDYGAKALGAQQAAQDARAEEGGEEGAAPEEGGYAQE	7.8	ELAEEGYSGVEVR-VTPTVTDIIIR-ATHTQEVLGEQGR-ATHTQEVLGEQGRR-EFIDSATR-	#
20140324-tam-191-2c	hypothetical protein PDE_02754 [Penicillium oxalicum 114-2]	gi%7c525581560	28961	190	39	5	0.17	MAAVQGAISKRRKFVADGVFYAELNEFFQRELAEEGYSGVEVRVTPTVTDIIIRATHTQEVLGEQGRRIRELTSLIQKRFKFPENSVSLYAAKVQNRGLSAVAQCESLRYKLLNGLAVRRACYGVLRFIMESGAKGCEVVVSGKLRAARAKSMKFTDGFMIHSGQPAKEFIDSATRHVLLRQGVLGIKVKIMRGSDPEGKSGPQKTLPDSVTIIEPKEEQPVLQPMSQDYGAKALAAQQAAEQQRLAEEQAASAEGGAEAYTQE	7.8	ELAEEGYSGVEVR-VTPTVTDIIIR-ATHTQEVLGEQGR-ATHTQEVLGEQGRR-EFIDSATR-	#
20140324-tam-191-2c	40S ribosomal protein S3 [Byssochlamys spectabilis No. 5]	gi%7c557729910	29170	190	39	5	0.17	MAATQGALSKRRKFVADGVFYAELNEFFQRELAEEGYSGVEVRVTPTVTDIIIRATHTQEVLGEQGRRIRELTSLIQKRFKFPENSVSLYAAKVQNRGLSAVAQCESLRYKLLNGLAVRRACYGVLRFIMESGAKGCEVVVSGKLRAARAKSMKFTDGFMIHSGQPAKEFIDSATRHVLLRQGVLGIKVKIMRGSDPEGKSGPQKTLPDSVTIIEPKEEQPVLQPVSQDYGAKALAAQQLAEQQRLAEQQEAEAQEGGAEAYAQE	7.8	ELAEEGYSGVEVR-VTPTVTDIIIR-ATHTQEVLGEQGR-ATHTQEVLGEQGRR-EFIDSATR-	#
20140324-tam-191-2c	40S ribosomal protein S3 [Aspergillus fumigatus Af293]	gi%7c70990926 gi%7c119496667 gi%7c66847944 gi%7c119413269 gi%7c159130785	29183	190	39	5	0.17	MAAVQGAISKRRKFVADGVFYAELNEFFQRELAEEGYSGVEVRVTPTVTDIIIRATHTQEVLGEQGRRIRELTSLIQKRFKFPENSVSLYAAKVQNRGLSAVAQCESLRYKLLNGLAVRRACYGVLRFIMESGAKGCEVVVSGKLRAARAKSMKFTDGFMIHSGQPAKEFIDSATRHVLLRQGVLGIKVKIMRGSDPEGKAGPQKTLPDSVTIIEPKEEQPVLQPMSQDYGAKALAAQQLAEQQRLAEQQAAEGQEGAGAEAYAQE	7.8	ELAEEGYSGVEVR-VTPTVTDIIIR-ATHTQEVLGEQGR-ATHTQEVLGEQGRR-EFIDSATR-	#
20140324-tam-191-2c	adenosylhomocysteinase [Coprinopsis cinerea okayama7#130]	gi%7c299740078 gi%7c298404076	47058	238	36	5	0.11	MVYKVADISLAAFGRKEIEIAENEMPGLMYLRQKYKEAQPLKGARIAGCLHMTIQTAVLIETLTALGAEVTWSSCNIFSTQDHAAAAIAATGVPVFAWKGETEEEYTWCIEQTIEGFADGKPLNMILDDGGDLTNLVHEKYPHLLQGIRGISEETTTGVHHLYKAFREGRLKVPAINVNDSVTKSKFDNYYGCRESLVDGIKRATDVMLAGKVAVVAGYGDVGKGCAESLRSYGARVLITEIDPINALQAAMAGYEVTTMEDAAPRANVFVTTTGNRDIITGEHFSVMPEDAIVCNIGHFDVEIDVAWLKANAKAVVNVKPQVDRFTMPNGRHIILLAEGRLVNLGCATGHPSFVMSCSFANQVLAQIALWTTPEKFPLGVHMLPKELDEEVARAHLAQ…	7.2	VADISLAAFGR-ATDVMLAGK-VAVVAGYGDVGK-HIILLAEGR-ELDEEVAR-	#
20140324-tam-191-2c	eukaryotic translation initiation factor 4_ putative [Aspergillus clavatus NRRL 1]	gi%7c121705144 gi%7c134034143 gi%7c119398981	44903	173	24	5	0.13	MASNDKGLEEIPEGQIESNYDEITDSFDSMDLKPELLRGIYAYGFERPSAIQQRAIMPIIKGSDVIAQAQSGTGKTATFSISALQKIDPNLKACQALILAPTRELAQQIQKVVVAIGDFMSLECHACIGGTNVREDMKALQDGPQVVVGTPGRVQDMIQRRVLRTDQMKLFILDEADEMLSRGFTEQIYDIFQLLPQSTQVVLLSATMPQDVLEVTTKFMRDPVRILVKKQELTLEGIKQFYIAVEKEEWKLDTLSDLYETVTITQAVIFCNTRRKVDWLTDKLTARDFTVSAMHGDMEQSQRDVIMKEFRSGSSRVLIATDLLARGIDVQQVSLVINYDLPANRENYIHRIGRGGRFGRKGVAINFVTADDVRMMREIEQFYSTQIEEMPMNVADLI	4.8	TATFSISALQK-VQDMIQR-LFILDEADEMLSR-VLIATDLLAR-KGVAINFVTADDVR-	#
20140324-tam-191-2c	hypothetical protein PDIP_54140 [Penicillium digitatum Pd1]	gi%7c425773589	69209	231	21	5	0.09	MSGHTFPVDLKQFKQLKLDPKTPQLSAEQKSDLQHNVNIFRDAIIAFTATGAARGVAGHTGGPFDTAPEVCILLAFINANPSKWVNALYDEAGHRVATQYLLAALDGKIEPDHLLNYRAADSHLPGHPELGFTPGIKFSSGRLGHMWGMVNGIAMANKYKNVIMLGSDGSQQEGNDAEAARLAVGRNLNVKLFIDNNDVTIAGHPSEYLKGYEVARTLGGHGLKVLRAQGEDLDSLYGAMCEVINHNGPAAVVIDRKMATGIEDIEGETHAHDVIPVEIARKYLTKRGYSKQQLAFYDDIKPGSNPHTYKGSSKDKGANRIIFGDAVNAILDKLSKEEAKRRVMVIDSDLAGSTGLKAIGAKHPESFVPSGVMERGNFSAAAGFGFGSNGERQGVFSTF…	4.2	DAIIAFTATGAAR-VMVIDSDLAGSTGLK-GNFSAAAGFGFGSNGER-FIFSTR-LGTHLLER-	#
20140324-tam-191-2c	phosphate carrier protein 2 [Aspergillus niger CBS 513.88]	gi%7c145230994 gi%7c134055888 gi%7c350638729	32679	164	16	5	0.15	MSASAKVEAPAAAPAPQLSGLQLYSRFAFAGAVCCSVTHGALTPVDVVKTRIQLDPVTYNRGMIGGFRQVIANEGAGALLTGLGPTAAGYFLQGAFKFGGYEFFKQQWINQLGLETASNNRTAVYLASSAAAEFFADIALCPLEATRIRLVSQPTFATGLVSGFGKILKNEGVGAFYSGFGPILFKQVPYTMAKFVVFEKAAEAIYGMVDKNTASDGTKTAINLGSGLIAGFAAALVSQPADTMLSKINKTPGEPGEGTVSRLIKIGKELGFRGSYAGIGARLFMVGTLTAGQFAIYGDIKRVLGATGGVEISK	3.2	IQLDPVTYNR-FGGYEFFK-LVSQPTFATGLVSGFGK-FVVFEK-GSYAGIGAR-	#
20140324-tam-191-2c	mitochondrial phosphate carrier protein [Aspergillus kawachii IFO 4308]	gi%7c358370162	32690	164	16	5	0.15	MAANAKVEAPAAAPAPQLSGLQLYSRFAFAGAVCCSVTHGALTPVDVVKTRIQLDPVTYNRGMIGGFRQVIANEGAGALLTGLGPTAAGYFLQGAFKFGGYEFFKQQWINQLGLETASNNRTAVYLASSAAAEFFADIALCPLEATRIRLVSQPTFATGLVSGFGKILKNEGVGAFYSGFGPILFKQVPYTMAKFVVFEKAAEAIYGMVDKNTASDGTKTAINLGSGLIAGFAAALVSQPADTMLSKINKTPGEPGEGTVSRLIKIGKELGFRGSYAGIGARLFMVGTLTAGQFAIYGDIKRVLGATGGVEISK	3.2	IQLDPVTYNR-FGGYEFFK-LVSQPTFATGLVSGFGK-FVVFEK-GSYAGIGAR-	#
20140324-tam-191-2c	hypothetical protein PDE_09504 [Penicillium oxalicum 114-2]	gi%7c525588290	16477	243	98	4	0.33	MADEQTFIAIKPDGVQRGLVGPIISRFENRGFKLVAMKLTSPSQEHLEKHYADLAGKGFFKGLISYMLSGPICAMVWEGKDAVKTGRTILGATNPLASAPGTIRGDYAIDVGRNVCHGSDSVENAKKEIALWFSPSEVLSWKATQAQWVYE	24.5	ADEQTFIAIKPDGVQR-GLVGPIISR-TILGATNPLASAPGTIR-GDYAIDVGR-	#
20140324-tam-191-2c	aldehyde dehydrogenase [Aspergillus niger CBS 513.88]	gi%7c145240395 gi%7c134077361 gi%7c350629882	53834	231	60	4	0.09	MSDLFTTITTPNGVKYEQPLGLFIDGEFVKGAEGKTFETINPSNEKPIVAVHEATEKDVDTAVAAARKAFEGSWRQVTPSTRGRMLTKLADLFERDAEILASIEALDNGKSITMAHGDIAGAAGCLRYYGGWADKIHGQTIDTNSETLNYTRHEPIGVCGQIIPWNFPLLMWAWKIGPAIATGNTVVIKTAEQTPLSGLYAAKLIKEAGIPAGVVNVISGFGRVAGSAISHHMDIDKVAFTGSTLVGRTILQAAAKSNLKKVTLELGGKSPNIVFNDADIDNAISWANFGIFYNHGQCCCAGSRILVQEGIYDKFIARLKERALQNKVGDPFAKDTFQGPQVSQLQFDRIMEYIQHGKDAGATVAVGGERHGTEGYFIQPTVFTDVTSDMKINQEEIFG…	15	LADLFER-TAEQTPLSGLYAAK-VAFTGSTLVGR-ELGSYALENYTQIK-	#
20140324-tam-191-2c	aldehyde dehydrogenase (AldA) [Aspergillus kawachii IFO 4308]	gi%7c358370830	53865	231	60	4	0.09	MSDLYATITTPNGVKYEQPLGLFIDGEFVKGADGKTFETINPATEKPIVSVYEASEKDVDTAVAAARKAFEGEWRHVTPSTRGRMLTKLADLFERDAEILVAIEALDNGKSITMARGDIAAAAGCLRYYGGWADKIHGQTIDTNSETLNYTRHEPIGVCGQIIPWNFPLLMWSWKIGPAIATGNTVVLKTAEQTPLSGLYAAKLVKEAGIPAGVVNVISGFGRVAGSAISHHMDIDKVAFTGSTLVGRTILQAAAKSNLKKVTLELGGKSPNIVFNDADIDNAISWANFGIFYNHGQCCCAGSRILVQEGIYDKFVARLKERALQNKVGDPFAQDTFQGPQVSQLQFDRIMEYIQHGKDAGATVAVGGERHGTEGYFIQPTVFTDVTSDMKINQEEIFG…	15	LADLFER-TAEQTPLSGLYAAK-VAFTGSTLVGR-ELGSYALENYTQIK-	#
20140324-tam-191-2c	Woronin body protein HexA_ putative [Penicillium digitatum Pd1]	gi%7c425774660	51618	161	50	4	0.08	MEPNKIGAKRSQMSFDPKVAMEILPSVNLDFDARVPIPFSVFPSSYRSDAVSETTQIRVEGEVNFDHTSRVEREDTRDSTPLPAPVHGKEEVEFRVQEEHSQYEQQSQQYEHQPSHNYAPEVELTRERYPSHQQSSLEYQDHTQVYDKVVETQIDLTERDYRSRTSPSNDLDVSDDRRYRQPIDSAYGYQSQSLEISNDRTSEPQTDSYKEDDVYLREVQPRARYSTPTQVKVSQSTTSEITSTRKMGYYNDEGQYHSFRRGVERAADRVMHPFSQSEIEETASGEVVAASESVRVVEPRNRGAAAETVPIPCHFVRVGDILILQGRPCQVIRISVSPQTGQHRYLGVDLFTRKLHEESSFIANPSPSVVVQTMLGPVYKTYRILDLRDDNRLVAMTEN…	12.5	ISVSPQTGQHR-YLGVDLFTR-ISEAFSDGR-ALVINDGGR-	#
20140324-tam-191-2c	catalase [Aspergillus clavatus NRRL 1]	gi%7c121712100 gi%7c119401817	80040	211	43	4	0.07	MRLTYLPGLIGVANAMCPYMTGELSRRDGLSKGDAAADTEEFLSQFYLNDTDAFMTTDVGGPIEDQNSLTAGDRGPTLLEDFIFRQKIQRFDHERVPERAVHARGTGAHGVFTSYGDFSNITAASFLGKEGKETPVFVRFSTVAGSRGSSDLSRDVHGFATRFYTDEGNFDIVGNNIPVFFIQDAILFPDLIHAVKPRGDNEIPQAATAHDSAWDFFSQQPSALHTLFWAMSGHGIPRSFRHVDGFGVHTFRFVTDDGATKLVKFHWTSLQGRASMVWEEAQQTSGKNPDYMRQDLFEAIEAGRYPEWELGVQIMDEEDQLRFGFDLLDPTKIVPEELVPITKLGKMQLNRNPRNYFAETEQVMFQPGHIVRGVDFTEDPLLQGRIFSYLDTQLNRHGG…	10.75	GPTLLEDFIFR-YPEWELGVQIMDEEDQLR-FGFDLLDPTK-GVDFTEDPLLQGR-	#
20140324-tam-191-2c	catalase [Aspergillus fumigatus]	gi%7c2431866	79929	211	43	4	0.07	MRLTFIPSLIGVANAVCPYMTGELNRRDEISDGDAAAATEEFLSQYYFNDNDAFMTSDVGGPIEDQNSFSAGERGPTLLEDFIFRQKIQRFDHERVPERAVHARGAGAHGVFTSYGDFSNITAASFLAKEGKQTPVFVRFSTVAGSRGSSDLARDVHGFATRFYTDEGNFDIVGNNIPVFFIQDAILFPDLIHAVKPRGDNEIPQAATAHDSAWDFFSQQPSTMHTLLWAMSGHGIPRSFRHVDGFGVHTFRFVTDDGASKLVKFHWKSLQGKASMVWEEAQQTSGKNPDFMRQDLHDAIEAGRYPEWELGVQIMDEEDQLRFGFDLLDPTKIVPEEFVPITKLGKMQLNRNPRNYFAETEQVMFQPGHIVRGVDFTEDPLLQGRLFSYLDTQLNRHGG…	10.75	GPTLLEDFIFR-YPEWELGVQIMDEEDQLR-FGFDLLDPTK-GVDFTEDPLLQGR-	#
20140324-tam-191-2c	clathrin heavy chain 1 [Aspergillus terreus NIH2624]	gi%7c115398041 gi%7c114192803	189951	195	22	4	0.02	MAPLPIKFTELINLTNAEIATLESDHYVCVRQKLSEEDKPQVIIVNLKNNNEIIKRPINADSAIMHWTKNIIALKAQGRTIQIFDLTAKQKLKSAVMNEDVVYWKWFSEKSLGLVTDTSVYHWDVFDPTQSQPLKVFDRLPNLSGCQIINYRVNDEEKWMVVVGISQQQGRVVGSMQLYSKERGISQFIEGHAAAFASIRVEGSPLEHKLFTFAVRTQTGAKLQIAEIDHQEPNPRFQKKAVEVYFPQEAVNDFPVAMQVSRKYDIVYLVTKYGFIHLYDLETGTCIFMNRISSETIFTTATDSDSAGIVGVNRKGQVLSVSVDESTIIQYLMENPAMSGLAVKLASKAGLPGADHLYQQQFDNLLAQGNYSEAAKIAANSPRGFLRTPETINCFKNAP…	5.5	SIEVYVQR-VSDSIESYIR-VANLEIYYR-YFVDIGSR-	#
20140324-tam-191-2c	clathrin heavy chain [Neosartorya fischeri NRRL 181]	gi%7c119500990 gi%7c119415417	191030	195	22	4	0.02	MAPLPIKFTELINLTNAEIAPQSIGFNSCTLESDHFVCVRQKLNEDDKPQVIIVNLKNNNEVIKRPINADSAIMHWTKNIIALRAQGRTIQIFDLSAKQKLKSAVMNEDVVYWKWFSETSLGLVTDASVYHWDVFDPTQNQPLKIFDRLPNLSGCQIINYRVNDDEKWMVVVGISQQQGRVVGSMQLYSKDRGISQFIEGHAAAFASIRVEGSPLEHKLFTFAVRTQTGAKLQIAEIDHQEPNPRFQKKAVEVYFPQEAVNDFPVAMQVSRKYDIVYLVTKYGFIHLYDLETGTCIFMNRISSETIFTTAPDSESAGLVGVNRKGQVLSVSVDEGTIIQYLMENPAMSGLAVKLASKAGLPGADHLYQQQFDNLLAQGNYSEAAKIAANSPRGFLRTPE…	5.5	SIEVYVQR-VSDSIESYIR-VANLEIYYR-YFVDIGSR-	#
20140324-tam-191-2c	clathrin heavy chain [Aspergillus niger CBS 513.88]	gi%7c317038086	190801	195	22	4	0.02	MAPLPIKFTELLNLTNAEIAPASIGFNSCTLESDNFVCVRQKLTEEDKPQVIIINLKNNNEVIKRPINADSAIMHWNRNIIALKAQGRTIQIFDLTAKQKLKSSVMNEDVVYWKWFNEKCLGLVTETSVFHWDVFDPTQTHPQKVFDRLPNLGGCQIINYRVNDDEKWMVVVGISSQGGRVVGSMQLYSKDRGISQFIEGHAAAFASIRVEGSPLEHKLFTFAVRTQTGAKLQIAEIDHQEPNPRFQKKAVEVYFPQEAVNDFPVAMQVSRKYDIVYLVTKYGFIHLYDLETGTCIFMNRISSETIFTTAPDTESAGLVGVNRKGQVLSVSVDENTIVQYLMENPAMSGLAVKLASKAGLPGADHLYQQQFDNLITQGNYSEAAKIAANSPRGFLRTPE…	5.5	SIEVYVQR-VSDSIESYIR-VANLEIYYR-YFVDIGSR-	#
20140324-tam-191-2c	clathrin heavy chain [Aspergillus fumigatus Af293]	gi%7c70994555 gi%7c66849689 gi%7c159125031	192816	195	22	4	0.02	MPNNISGDQTSHSIFIISSIHFSHSPHLHPHCLTVQVPFGAYPFAQSDHFVCVRQKLNEDDKPQVIIVNLKNNNETIKRPINADSAIMHWSRNIIALRAQGRTIQIFDLSAKQKLKSAVMNEDVVYWKWFSETSLGLVTDASVYHWDVFDPTQNQPLKIFDRLPNLSGCQIINYRVNDDEKWMVVVGISQQQGRVVGSMQLYSKDRGISQFIEGHAAAFASIRVEGSPLEHKLFTFAVRTQTGAKLQIAEIDHQEPNPRFQKKAVEVYFPQEAVNDFPVAMQVSRKYDIVYLVTKYGFIHLYDLETGTCIFMNRISSETIFTTAPDSESTGLVGVNRKGQVLSVSVDEGTIIQYLMENPAMSGLAVKLASKAGLPGADHLYQQQFDNLLAQGNYSEAAK…	5.5	SIEVYVQR-VSDSIESYIR-VANLEIYYR-YFVDIGSR-	#
20140324-tam-191-2c	unnamed protein product [Aspergillus oryzae RIB40]	gi%7c83769168	190458	195	22	4	0.02	MAPLPIKFTELINPASIGFNSCTLESDHYVCVRQKLNEEDKPQVIIINLKNNNEILKRPINADSAIMHWTKNIIALKAQGRTIQIFDLGAKQKLKSAVMNEDVVYWKWFSDKCLGLVTDSSVYHWDVFDPTQSQPLKIFDRLPNLSGCQIINYRVNDDEKWMVVVGISQQQGRVVGSMQLYSKERGISQFIEGHAAAFASIRVEGSPLEHKLFTFAVRTQTGAKLQIAEIDHQDPNPRFQKKAVEVYFPQEAVNDFPVAMQVSRKYDVVYLVTKYGFIHLYDLETGTCIFMNRISSETIFTTAPDSDSAGLVGVNRKGQVLSVSVDENTIVQYLMENPAMSGLAVRLASKAGLAGADHLYQQQFDNLLAQGNYSEAAKIAANSPRGFLRTPETINRFKN…	5.5	SIEVYVQR-VSDSIESYIR-VANLEIYYR-YFVDIGSR-	#
20140324-tam-191-2c	Pc12g16530 [Penicillium chrysogenum Wisconsin 54-1255]	gi%7c255934848 gi%7c255942167 gi%7c211583070 gi%7c211586585	100375	145	21	4	0.04	MSYMKKNEDEDQVMIKLDRTSVFQDARLFNSSPISPRTCRTLLTKIAVLMFTGEQFPTNEATTLFFGISKLFQNKDPSLRQMVYLILKELAGTAEDVIMSTSIIMKDTAVGSDVLYRANAIRALCRIIDGSTVQGIERLIKTAIVDKTPSVSSAALVSSYHLLPIARDVVRRWQSETQEAASSSKSSTGFLGFSSSSQSHAISNSNFMTQYHAIGLLYQMRSHDRMSLVKMVQQYGAAGVVKSPAALVLLVRLAAKLAEEDQGLRKPMMQMLDGWLRHKHEMVNFEAAKAICDMRDVTDAEATQAVHVLQLFLSSPRSITKFAAIRILHNFASFKPHVVNVCNPDMESLISNSNRSIATFAITTLLKTGNEASVDRLMKQISGFMADITDEFKVTIVEA…	5.25	LFNSSPISPR-IIDGSTVQGIER-SPAALVLLVR-VVLENAIVR-	#
20140324-tam-191-2c	Coatomer subunit gamma [Penicillium digitatum Pd1]	gi%7c425768436 gi%7c425770296	103268	145	21	4	0.04	MSYMKKNEDEDQVMIKLDRTSVFQDGVHSTIPPWRLHALHMSSADDIILLARLFNSSPISPRTCRTLLTKIAVLMFTGEQFPTNEATTLFFGISKLFQNKDPSLRQMVYLILKELAGTAEDVIMSTSIIMKDTAVGSDILYRANAIRALCRIIDGSTVQGIERLIKTAIVDKTPSVSSAALVSSYHLLPIARDVVRRWQSETQEAASSSKSSTGFLGFSSSQSHAISNSNFMTQYHAIGLLYQMRSHDRMSLVKMVQQYGAAGVVKSPAALVLLVRLAAKLAEEDQGLRKPMMQMLDGWLRHKHEMVNFEAAKAICDMRDVTDAEATQAVHVLQLFLSSPRSITKFAAIRILHNFASFKPHVVNACNPDIESLISNSNRSIATFAITTLLKTGNEASVD…	5.25	LFNSSPISPR-IIDGSTVQGIER-SPAALVLLVR-VVLENAIVR-	#
20140324-tam-191-2c	60S ribosomal protein L20 [Neosartorya fischeri NRRL 181]	gi%7c119496875 gi%7c119413373	23671	190	19	4	0.21	MAMEDTPIAREVRKVFWKYGMRLFIEEGGRLTEYQVIGRHLPTEANPTPKLYRMRIFAPNTVVAKSRFWYFLTQLRKVKKANGEIVSLNVIHEKRPLKVKNFGIWLRYDSRSGTHNMYKEFREMSRTEAVEALYQDMAARHRARFGSIHILKVVEIEKADTIRRPYIKQLLQKNLKFPLPHRSAKPAGKKVFAYSRPSTFA	4.75	LTEYQVIGR-HLPTEANPTPK-IFAPNTVVAK-TEAVEALYQDMAAR-	#
20140324-tam-191-2c	60S ribosomal protein L20 [Aspergillus clavatus NRRL 1]	gi%7c121702885 gi%7c119397850	23663	190	19	4	0.21	MTDLSGLDNTMKCWMCIGRNMEQSLTGVVSIGRLTEYQVIGRHLPTEANPTPKLYRMRIFAPNTVVAKSRFWYFLTQLRKVKKANGEIVSLNVINEKRPLKVKNFGIWLRYDSRSGTHNMYKEFREMSRTEAVEALYQDMAARHRARFGSIHILKVVEIEKADTIRRPYIKQLLQKNLKFPLPHRAAKPAGKKVFAYSRPSTFA	4.75	LTEYQVIGR-HLPTEANPTPK-IFAPNTVVAK-TEAVEALYQDMAAR-	#
20140324-tam-191-2c	60S ribosomal protein L20 [Aspergillus niger CBS 513.88]	gi%7c317025299	20140	190	19	4	0.25	MGRLTEYQVIGRHLPTEANPTPKLYRMRIFAPNTVVAKSRFWYFLTQLRKVKKANGEIVSINVISEKRPTKVKNFGIWLRYDSRSGTHNMYKEFREMSRTEAVEALYQDMAARHRARFGSIHILKVVEIENADSIRRPYIKQLLSKNLKFPLPHRAAHGKKLFAYSRPTTFA	4.75	LTEYQVIGR-HLPTEANPTPK-IFAPNTVVAK-TEAVEALYQDMAAR-	#
20140324-tam-191-2c	unnamed protein product [Aspergillus oryzae RIB40]	gi%7c83767857	20393	190	19	4	0.25	MGRLTEYQVIGRHLPTEANPTPKLYRMRIFAPNTVVAKSRFWYFLTQLRKVKKANGEIVSLNVIPEKRHLKVKNFGIWIRYDSRSGTHNMYKEFREMSRTEAVEALYQDMAARHRARFGSIHILKVVEVDNADSIRRPYIKQLLQKDLKFPLPHRAAKSEGKKIFAYSRPATFA	4.75	LTEYQVIGR-HLPTEANPTPK-IFAPNTVVAK-TEAVEALYQDMAAR-	#
20140324-tam-191-2c	isocitrate dehydrogenase [NADP]_ mitochondrial [Aspergillus kawachii IFO 4308]	gi%7c358367763	55515	135	13	4	0.05	MSSVRFSSALARRSFAVASPPLSAPLSSSARRFLSSSSSSISSSSSSVSTRSPRSLTSASSLLSSRTASARWTGLSSLNLTQSRTMATEISKIKVKNPVVELDGDEMTRIIWQEIREKLILPYLDIDLKYYDLGLEYRDQTDDQVTVEAAEAIKKYGVGVKCATITPDEARVEEFKLKKMWLSPNGTIRNILGGTVFREPIIIPAIPRLVPGWNKPIIIGRHAFGDQYRATDRVIPGPGKLELVYTPVNGEPETVKVYDFQGGGIAQTQYNTDESIRGFAHASFQMALLKGLPLYMSTKNTILKRYDGRFKDIFQEIYESTYQKDFEAKNLWYEHRLIDDMVAQMIKSEGGFVMALKNYDGDVQSDIVAQGFGSLGLMTSTLVTPTGEAFESEAAHGTV…	3.25	NILGGTVFR-NILGGTVFREPIIIPAIPR-EPIIIPAIPR-HAFGDQYR-	#
20140324-tam-191-2c	histone H4 [Coccidioides immitis RS]	gi%7c119186679 gi%7c303317590 gi%7c240108478 gi%7c320038790 gi%7c392870667	11393	156	65	3	0.29	MTGRGKGGKGLGKGGAKRHRKILRDNIQGITKPAIRRLARRGGVKRISAMIYEETRSVLKTFLEGVIRDAVTYTEHAKRKTVTSLDVVYALKRQGRTLYGFGG	21.6667	ISAMIYEETR-TFLEGVIR-TVTSLDVVYALK-	#
20140324-tam-191-2c	histone H4 [Aspergillus oryzae RIB40]	gi%7c169763210 gi%7c212531987 gi%7c238489089 gi%7c122092 gi%7c51315720 gi%7c296341 gi%7c529955 gi%7c9955877 gi%7c83770533 gi%7c210071514 gi%7c220698170 gi%7c259488986 gi%7c425770105 gi%7c425771652 gi%7c525579049 gi%7c227597	11349	156	65	3	0.29	MSGRGKGGKGLGKGGAKRHRKILRDNIQGITKPAIRRLARRGGVKRISAMIYEETRGVLKTFLEGVIRDAVTYTEHAKRKTVTSLDVVYALKRQGRTLYGFGG	21.6667	ISAMIYEETR-TFLEGVIR-TVTSLDVVYALK-	#
20140324-tam-191-2c	Pc16g12260 [Penicillium chrysogenum Wisconsin 54-1255]	gi%7c255941512 gi%7c211586148	14715	156	65	3	0.22	MGHGKVGVPTLGSPVTTPHFHFFNKKRVLTRLISGGKGGKGLGKGGAKRHRKILRDNIQGITKPAIRRLARRGGVKRISAMIYEETRGVLKTFLEGVIRDAVTYTEHAKRKTVTSLDVVYALKRQGRTLYGFGG	21.6667	ISAMIYEETR-TFLEGVIR-TVTSLDVVYALK-	#
20140324-tam-191-2c	histone H4 [Nectria haematococca mpVI 77-13-4]	gi%7c302901592 gi%7c302903065 gi%7c256729403 gi%7c256729711 gi%7c451992119 gi%7c452004566 gi%7c452981243 gi%7c477587432	10079	156	65	3	0.33	GAKRHRKILRDNIQGITKPAIRRLARRGGVKRISAMIYEETRGVLKTFLEGVIRDAVTYTEHAKRKTVTSLDVVYALKRQGRTLYGFGG	21.6667	ISAMIYEETR-TFLEGVIR-TVTSLDVVYALK-	#
20140324-tam-191-2c	hypothetical protein FG04289.1 [Fusarium graminearum PH-1]	gi%7c46116894	9150	156	65	3	0.37	MRDNIQGITKPAIRRLARRGGVKRISAMIYEETRGVLKTFLEGVIRDAVTYTEHAKRKTVTSLDVVYALKRQGRTLYGFGG	21.6667	ISAMIYEETR-TFLEGVIR-TVTSLDVVYALK-	#
20140324-tam-191-2c	H4_NEUCR Histone H4 [Aspergillus nidulans FGSC A4]	gi%7c67516905 gi%7c40746220	10510	156	65	3	0.32	MSGRGAKRHRKILRDNIQGITKPAIRRLARRGGVKRISAMIYEETRGVLKTFLEGVIRDAVTYTEHAKRKTVTSLDVVYALKRQGRTLYGFGG	21.6667	ISAMIYEETR-TFLEGVIR-TVTSLDVVYALK-	#
20140324-tam-191-2c	glyceraldehyde-3-phosphate dehydrogenase [Aspergillus oryzae]	gi%7c12802697	36220	143	49	3	0.09	MATPKVGINGFGRIGRIVFRNAIASGDVDVVAVNDPFIETHYAAYMLKYDSTHGRFQGTIETYDEGLIVNGKKIRFFAERDPAAIPWGSAGAAYIVESTGVFTTTEKASAHLKGGAKKVIISAPSADAPMFVMGVNNKEYKTNINVLSNASCTTNCLAPLAKVINDKFGLVEGLMTTVHSYTATQKTVDAPSAKDWRGGRTAAQNIIPSSTGAAKAVGKVIPSLNGKLTGMSMRVPTANVSVVDLTCRTEKAVTYEDIKKTIKAASEEGELKGILGYTEDDIVSTDLIGDAHSSIFDAKAGIALNEHFIKLVSWYDNEWGYSRRVVDLIAYISKVDGQ	16.3333	VGINGFGR-TAAQNIIPSSTGAAK-VVDLIAYISK-	#
20140324-tam-191-2c	glyceraldehyde-3-phosphate dehydrogenase [Aspergillus niger CBS 513.88]	gi%7c145251966 gi%7c2494634 gi%7c1841397 gi%7c134083038 gi%7c350633405	36164	143	49	3	0.09	MAPKVGINGFGRIGRIVFRNAINHGEVDVVAVNDPFIETHYAAYMLKYDSTHGQFKGTIETYEEGLIVNGKKIRFFAERDPAAIPWGTTGADYIVESTGVFTTQEKAAAHLKGGAKKVVISAPSADAPMFVMGVNNTSYTKDINVLSNASCTTNCLAPLAKVINDKFGIVEGLMTTVHSYTATQKVVDAPSSKDWRGGRTAAQNIIPSSTGAAKAVGKVIPTLNGKLTGMAMRVPTSNVSVVDLTCRLEKATSYDEIKKALKDASENELKGILGYTEDDIVSSDLNGDDHSSIFDAKAGIALNSNFVKLVSWYDNEWGYSRRVVDLIAYISKVDAQ	16.3333	VGINGFGR-TAAQNIIPSSTGAAK-VVDLIAYISK-	#
20140324-tam-191-2c	glyceraldehyde 3-phosphate dehydrogenase GpdA [Aspergillus flavus NRRL3357]	gi%7c238485566 gi%7c220698900	36278	143	49	3	0.09	MATPKVGINGFGRIGRIVFRNAIASGDVDVVAVNDPFIETHYAAYMLKYDSTHGRFQGTIETYEEGLIVNGKKIRFFAERDPAAIPWGSAGAAYIVESTGVFTTTEKASAHLKGGAKKVIISAPSADAPMFVMGVNNKEYKTDINVLSNASCTTNCLAPLAKVINDNFGLVEGLMTTVHSYTATQKTVDAPSAKDWRGGRTAAQNIIPSSTGAAKAVGKVIPSLNGKLTGMSMRVPTANVSVVDLTCRTEKAVTYEDIKKTIKAASEEGELKGILGYTEDDIVSTDLIGDAHSSIFDAKAGIALNEHFIKLVSWYDNEWGYSRRVVDLIAYISKVDNQ	16.3333	VGINGFGR-TAAQNIIPSSTGAAK-VVDLIAYISK-	#
20140324-tam-191-2c	glyceraldehyde-3-phosphate dehydrogenase [Aspergillus luchuensis]	gi%7c341603865 gi%7c358368189	36166	143	49	3	0.09	MAPKVGINGFGRIGRIVFRNAINHGEVDVVAVNDPFIETHYAAYMLKYDSTHGQFKGTIETYEEGLIVNGKKIRFFAERDPAAIPWGTTGADYIVESTGVFTTQEKASAHLKGGAKKVVISAPSADAPMFVMGVNNTSYTKDVNVLSNASCTTNCLAPLAKVINDKFGIVEGLMTTVHSYTATQKVVDAPSSKDWRGGRTAAQNIIPSSTGAAKAVGKVIPTLNGKLTGMAMRVPTSNVSVVDLTCRLEKATSYDEIKKAIKDASENELKGILGYTEDDIVSSDLNGDDHSSIFDAKAGIALNSNFVKLVSWYDNEWGYSRRVVDLIAYISKVDAQ	16.3333	VGINGFGR-TAAQNIIPSSTGAAK-VVDLIAYISK-	#
20140324-tam-191-2c	Pc12g05400 [Penicillium chrysogenum Wisconsin 54-1255]	gi%7c255931657 gi%7c211582004	51824	100	40	3	0.06	MASSLRIGTTALRSSIAKPVQSAAFNGVRCYSSAKVKSLKDTFADNLPAEIEKVKKLRKEHGNKVIGEVTLDQAYGGARGIKSLVWEGSVLDSEEGIRFRGYTIPECQKLLPKAPGGEEPLPEGLFWLLLTGEIPSEQQVRNLSAEWAARSDVPKFVEELIDRCPNTLHPMAQFSLAVTALEHESAFAKAYAKGVNKKEYWTYTFEDSMDLIAKLPTIAARIYRNVFKDGKVAPIQKDKDYSFNLANQLGFGGNKDFVELMRLYLTIHSDHEGGNVSAHTTHLVGSALSSPMLSLSAGLQGLAGPLHGLANQEVLNWITKMKESVGNDISDQSIKDYLWSTLNNGQVVPGYGHAVLRKTDPRYVSQREFALRKLPDDPLFKLVSQVYKIAPGVLTEHGK…	13.3333	NLSAEWAAR-AIGVLPQLIIDR-ALGMPIERPK-	#
20140324-tam-191-2c	mitochondrial citrate synthase precursor [Penicillium oxalicum]	gi%7c260875772	51744	100	40	3	0.06	MASSLRIGTTALRSSIAKPVQTAAFNGVRCYSSAKTKSLKDTCADNLPAEIEKVKKLRKEHGNKVIGEVTLDQAYGGARGIKSLVWEGSVLDSEEGIRFRGYTIPECQKLLPKAPGGEEPLPEGLFWLLLTGEIPSEQQVRNLSAEWAARSDVPKFVEELIDRCPNTLHPMAQFSLAVTALEHESAFAKAYAKGVNKKEYWTYTFEDSMDLIAKLPTIASRIYRNVFKDGKVAPVQKDKDYSFNLANQLGFGGNKDFVELMRLYLTIHSDHEGGNVSAHTTHLVGSALSSPMLSLSAGLQGLAGPLHGLANQEVLNWITKMKESVGSDISDQSIKDYLWSTLNSGQVVPGYGHAVLRKTDPRYVSQREFALRKLPDDPLFKLVSQVYKIAPGVLTEHGK…	13.3333	NLSAEWAAR-AIGVLPQLIIDR-ALGMPIERPK-	#
20140324-tam-191-2c	Citrate synthase [Penicillium digitatum PHI26]	gi%7c425774109 gi%7c425778562	51808	100	40	3	0.06	MASSLRIGTTALRSSIAKPVQSAALNGVRCYSSVKVKSLKDTFADNLPAEIEKVKKLRKEHGNKVIGEVTLDQAYGGARGIKSLVWEGSVLDSEEGIRFRGYTIPECQKLLPKAPGGEEPLPEGLFWLLLTGEIPSEQQVRNLSAEWAARSDVPKFVEELIDRCPNTLHPMAQFSLAVTALEHESAFAKAYAKGVNKKEYWTYTFEDSMDLIAKLPTIASRIYRNVFKDGKVAPVQKDKDYSFNLANQLGFGDNKDFVELMRLYLTIHSDHEGGNVSAHTTHLVGSALSSPMLSLSAGLQGLAGPLHGLANQEVLNWITKMKESVGSDISDQSIKDYLWATLNSGQVVPGYGHAVLRKTDPRYVSQREFALRKLPDDPLFKLVSQVYKIAPGVLTEHGK…	13.3333	NLSAEWAAR-AIGVLPQLIIDR-ALGMPIERPK-	#
20140324-tam-191-2c	hypothetical protein FOXB_12882 [Fusarium oxysporum Fo5176]	gi%7c342874587	36069	121	35	3	0.08	MVKTIPFGDITVPSPGFGAMGMSFGLGSNLSLEEAEPVLLKAIELGCTFWDTAVVYQAGVNEKLLGDFIRKHNVRDKVFIASKCGFDVFGKGGVTNSASHIKEYIEGTIERLGFAPDLYYLHRIDPNTPLEESIPALDEIRKQGKTKYIGLSECSANTLRKANSIAKIDAVQAEYSAFETLHETDGLIDTAKELGIAYVAYSPLGHGWLVDDFPYKSPDDFAPDDFRRTVPKFQGENFYKNKAIVEEIKKLAVRKGCTLTQIALAWVASQGMIAIPGTTKAHRLEENWASRNVDLTDDEKAEMRRIIDSAKPQGNRYSATHQALVGH	11.6667	LLGDFIR-EYIEGTIER-LGFAPDLYYLHR-	#
20140324-tam-191-2c	hypothetical protein TRIVIDRAFT_64985 [Trichoderma virens Gv29-8]	gi%7c358378521	35861	121	35	3	0.08	MVHTLPFGNITVPSPGFGAMGISFGLGSNLTLEQAEPVLLKAIELGCTFWDTAVVYQAGVNEKLLGDFIRKHNVRDKVFIASKCGFDVFGTGKVTNSAAHIKEYIEGTIERLGFAPDLYYLHRIDPNTKLEESIPALDEIRKAGKTKYIGLSECSAATLQRANSIAKIDAVQAEYSAFETLHETDGLIEMARELGVAYVAYSPLGHGWLVDDFPYKTPDDFAPDDFRRSVPKFQGENFYKNKAIVEELKKLATKKGCSTPQVALAWVAAQGMIAIPGTTKASRLEENWASRDVVLSEEELQEVRALVDSAKPHGNRYAPAQQAMVGH	11.6667	LLGDFIR-EYIEGTIER-LGFAPDLYYLHR-	#
20140324-tam-191-2c	aldo-keto reductase [Colletotrichum orbiculare MAFF 240422]	gi%7c477531370	36124	121	35	3	0.08	MVKTLPFGNLHVPTPGFGAMGLSFGLGSNLSLEEAEPVLLKAIELGCTFWDTAVVYQAGVNEKLLGDFIRKHNVRDKVFIASKCGFDVFGQGGVTNSSSHIKEYIEGTIERLGFAPDLYYLHRIDPNTPLEESIPALDEIRRAGKTKYIGLSECAAETLRKANSIAKIDAVQAEYSAFETLHETDGLIDTARELGVAYVAYSPLGHGWLVDDFQFKSPEDFAPDDFRRKIPKFQGENFYKNKAIVDEIKKLAIRKGCSLPQIALAWVAAQGMIAIPGTTKAKRLEENWASRDIGLTEEERKEMRKIIDAAKPHGNRYEAAQQAAVGH	11.6667	LLGDFIR-EYIEGTIER-LGFAPDLYYLHR-	#
20140324-tam-191-2c	aldo-keto reductase (YakC) [Aspergillus fumigatus Af293]	gi%7c70983045 gi%7c66844675 gi%7c159123936	36430	121	35	3	0.08	MVKTLPFGDIQVPSPGFGAMGLSFGLGTNLTFEEAEPVLLKAIELGCTFWDTAVVYQAGVNEKLLGDFIRKHNVRDKVFIASKCGFNVFGDRSVTNSPAHIKEYIEGTIERLGFAPDLYYLHRIDPKTPLEESIPALDEIRKAGKTKYIGLSECSAATLRKANSIAKIDAVQAEYSAFETIHETDGLIDTCRELGVAYVAYSPLGHGWLVDDFQYKSPDDFAPNDFRRTSPKFQGENFYKNRAIVEEIKKLAARKKCTTSQIALAWVAAQGFIAIPGTTKAKRLEENWASREIELTEEEKQEMRRIIDVAKPHGNRYGPENQALVGH	11.6667	LLGDFIR-EYIEGTIER-LGFAPDLYYLHR-	#
20140324-tam-191-2c	ATP citrate lyase_ subunit 1_ putative [Neosartorya fischeri NRRL 181]	gi%7c119471597 gi%7c119406342	71916	174	33	3	0.06	MPSSAPLAGTANGTLNANDNITRFEPPSRVLSPLTHTLFHNKTRCFVYGMQPRAVQGMLDFDFICKRSTPSVAGIIYTFGGQFVSKMYWGTSETLLPVYQDAAKAMAKHPDVDTVVNFASSRSVYSSTMELMNYPQIKSIAIIAEGVPERRAREIMVIAKEKGITIIGPATVGGIKPGAFKIGNTGGMMDNIVASKLYRKGSVGYVSKSGGMSNELNNIISQTTDGVHEGIAIGGDRYPGTTFIDHLLRYQADPDCKILLLLGEVGGVEEYRVIEAVKNGTITKPLVAWAIGTCASMFKTEVQFGHAGASANSQLETAVYKNKAMREAGIHVPDTFEELPQLLKQVYEDQVKKGVIKPQPEPQVPKIPIDYSWAQELGLIRKPAAFISTITDDRGQELL…	11	SIAIIAEGVPER-DLISALVSGLLTIGSR-MGVLNGLFVLGR-	#
20140324-tam-191-2c	hypothetical protein SS1G_02379 [Sclerotinia sclerotiorum 1980]	gi%7c156060481 gi%7c154699787	71305	174	33	3	0.06	MPSATESGAGNANDNIRRFTAPSRPLSPRAEHTLFHDKTRCFVYGLQPRAVQGMLDFDFICKRKTPSVAGIIYTFGGQFVSKMYWGTSETLLPVYQDVGKAMAKHEDVDTVVNFASSRSVYQSTMELLEYPQIKSIAIIAEGVPERRAREILHAAAKKGVTIIGPATVGGIKPGSFKIGNTGGMMDNIVASKLYRKGSVGYVSKSGGMSNELNNIIANTTDGVYEGVAIGGDRYPSTTFIDHLLRYQADPECKILVLLGEVGGVEEYRVIEAVKNGTITKPIVAWAIGTCASMFKTEVQFGHAGSFANSQLETAATKNKSMKEAGFHVPDTFEDMPAVLASVYEKLVADGTIVPQPEPIVPKIPIDYSWAQELGLIRKPAAFISTISDDRGQELLYAGM…	11	SIAIIAEGVPER-DLISALVSGLLTIGSR-MGVLNGLFVLGR-	#
20140324-tam-191-2c	hypothetical protein SNOG_06832 [Phaeosphaeria nodorum SN15]	gi%7c169607547 gi%7c160701438	71299	174	33	3	0.06	MSSAAQTPSQAATSTDGLSQPPNEPARRTHPLPPEDTMLRLRVYSGLQPRAVQGMLDFDFICKRKQPSVAGIIYTFGGQFVSKMYWGTSETLLPVYQDVGKAIAKHADVDTVVNFASSRSVYQSTMELLEFPQIKSIAIIAEGVPERRAREILHVAQKKGVTIIGPATVGGIKPGAFKIGNTGGMMDNIVASKLYRPGSVSYVSKSGGMSNELNNIIANTTDGVLEGVAIGGDRYPGTTFIDHVLRYQADPDCKIIVLLGEVGGVEEYRVIEAVKSGQVNKPIVAWAIGTVAGMLKTEVQFGHAGSFANSQLETAVTKNNSMREAGIYVPETFEEMPGTLAQVYQKLLKDGTINPKPEPVVPKIPIDYSWAQELGLIRKPAAFISTISDDRGQELLYAG…	11	SIAIIAEGVPER-DLISALVSGLLTIGSR-MGVLNGLFVLGR-	#
20140324-tam-191-2c	CND6_ similar to ATP-citrate synthase subunit [Botryotinia fuckeliana T4]	gi%7c347839840 gi%7c472243656	71400	174	33	3	0.06	MPSATASGAQGNANDNIRRFAAPSRPLSPRAEHTLFHDKTRCFVYGLQPRAVQGMLDFDFICKRKTPSVAGIIYTFGGQFVSKMYWGTSETLLPVYQDVEKAMAKHEDVDTVVNFASSRSVYQSTMELLQYPQIKSIAIIAEGVPERRAREILHAAAKKGVTIIGPATVGGIKPGSFKIGNTGGMMDNIVASKLYRKGSVGYVSKSGGMSNELNNIIANTTDGVYEGVAIGGDRYPSTTFIDHLLRYQADPECKILVLLGEVGGVEEYRVIEAVKNGTITKPIVAWAIGTCASMFKTEVQFGHAGSFANSQLETAATKNKSMRDAGFHVPDTFEDMPAVLASVYEKLVAAGTIVPQPEPIVPKIPIDYSWAQELGLIRKPAAFISTISDDRGQELLYAG…	11	SIAIIAEGVPER-DLISALVSGLLTIGSR-MGVLNGLFVLGR-	#
20140324-tam-191-2c	ATP-citrate synthase subunit 1 [Aspergillus kawachii IFO 4308]	gi%7c358367518	71534	174	33	3	0.06	MPTSAPLVNTANGASANDNITRFDPPSRVRSPLSNALFHNKTRCFVYGMQPRAVQGMLDFDFICKRSTPSVAGIIYTFGGQFVSKMYWGTSETLLPVYQDVSKAMAKHPDVDTVVNFASSRSVYSSTMELMECPQIRSIAIIAEGVPERRAREIMVKAKEKGITIIGPATVGGIKPGAFKIGNTGGMMDNIVASKLYRKGSVGYVSKSGGMSNELNNIISQTTDGVYEGVAIGGDRYPGTTFIDHLLRYQAEPECKILVLLGEVGGVEEYRVIEAVKNGTITKPIVAWAIGTCASMFKTEVQFGHAGASANSDLETAVAKNKAMREAGIFVPETFEDLPQTLKEVYDDQVKKGIVQPQPEPVVPKIPIDYSWAQELGLVRKPAAFISTISDDRGQELLY…	11	SIAIIAEGVPER-DLISALVSGLLTIGSR-MGVLNGLFVLGR-	#
20140324-tam-191-2c	ATP citrate lyase_ subunit 1_ putative [Penicillium digitatum Pd1]	gi%7c425777658 gi%7c425779854	71392	174	33	3	0.06	MPSSTLSAGNGVQSANDNITRFAPPSRVLSPSQHSLFHNKTRCFVYGMQPRAVQGMLDFDFICKRSTPSVAGIIYTFGGQFVSKMYWGTSETLLPVYQDVEKAMAKHPDVDTVVNFASSRSVYTSTMELMENPQIRSIAIIAEGVPERRAREIMVTAKEKGITIIGPATVGGIKPGAYKIGNTGGMMDNIVASKLYRKGSVGYVSKSGGMSNELNNIISQNTDGVFEGVAIGGDRYPGTTFIDHLLRYQAEPECKILVLLGEVGGVEEYRVIEAVKNGTITKPIVAWAIGTCASLFKTEVQFGHAGASANSDLETAVTKNKAMREAGIHVPDTFEDLPQILKQVYDAELQKGTITPAPEPVVPKIPIDYSWAQELGLVRKPAAFISTISDDRGQELLYA…	11	SIAIIAEGVPER-DLISALVSGLLTIGSR-MGVLNGLFVLGR-	#
20140324-tam-191-2c	ATP-citrate synthase subunit 1 [Coniosporium apollinis CBS 100218]	gi%7c494830866	73783	174	33	3	0.05	MPSAVPSAPVNGTTSLGAPDHNGVNGTNGVHDAPSADDNIRRFAAPSRPLSPPAAHMLFHNKTRCFVYGLQPKAVQGMLDFDFICKRKTPSVAGIIYTFGGQFVSKMYWGTSETLLPVYQSTEKAMAKHTDVDTIVNFASSRSVYSSTMELMEFPQIRSIAIIAEGVPERRAREILHVAKKKGITIIGPATVGGIKPGDFKIGNTGGMMDNIVASKLYRPGSVAYVSKSGGMSNELNNIIAHRTDGVYEGVAIGGDRYPGTTFIDHMLRYQADPACKILLLLGEVGGVEEYRVIEAVKSGQITKPIVAWAIGTVAGLLKTEVQFGHAGSFANSQLETAAMKNKSMKEVGIFVPDTFEEMPDLLAEVYQKLVKDGTIVPKTEPVVPKIPIDYSWAQELGL…	11	SIAIIAEGVPER-DLISALVSGLLTIGSR-MGVLNGLFVLGR-	#
20140324-tam-191-2c	ATP-citrate synthase subunit 1 [Byssochlamys spectabilis No. 5]	gi%7c557726598	72346	174	33	3	0.05	MQQSAIAFTMPSVAPLASTANGVQSANDNITRFDPPSRYVGPIPLQPNGAELTSSSGMQPRAVQGMLDFDFICKRSTPSVAGIIYTFGGQFVSKMYWGTSETLLPVYQDVGKAMAKHPDVDTVVNFASSRSVYSSTMELMEYPQIKSIAIIAEGVPERRAREIMVTAKEKGITIIGPATVGGIKPGAFKIGNTGGMMDNIVASKLYRKGSVGYVSKSGGMSNELNNIISQNTDGVYEGIAIGGDRYPGTTFIDHLLRYQADPECKILVLLGEVGGVEEYRVIEAVKNGTITKPVVAWAIGTCASMFKTEVQFGHAGASANSDLETAVSKNKHMREAGIHVPDTFEDLPQVLAEVYQNLVKNGTIVPRPEPQVPKIPMDYSWAQELGLIRKPAAFISTIS…	11	SIAIIAEGVPER-DLISALVSGLLTIGSR-MGVLNGLFVLGR-	#
20140324-tam-191-2c	ATP citrate lyase_ subunit 1 [Aspergillus fumigatus Af293]	gi%7c70992209 gi%7c66848586	78779	174	33	3	0.05	MVQPSPPSRIPPRAALARYCTNTVSSGKVSSSPQLLDIVEPPPPSTQPSCPHLLLSLALPMAISTPMTTSLASSLPAECSLLLLTLSSTTRRDASYSKCFLAANRVNGWADGYHSGMQPRAVQGMLDFDFICKRSTPSVAGIIYTFGGQFVSKMYWGTSETLLPVYQDVAKAMAKHPDVDTVVNFASSRSVYSSTMELMNYPQIKSIAIIAEGVPERRAREIMVTAKEKGITIIGPATVGGIKPGAFKIGNTGGMMDNIVASKLYRKGSVGYVSKSGGMSNELNNIISQTTDGVHEGIAIGGDRYPGTTFIDHLLRYQADPDCKILLLLGEVGGVEEYRVIEAVKNGTITKPLVAWAIGTCASMFKTEVQFGHAGASANSQLETAVYKNKAMREAGIHV…	11	SIAIIAEGVPER-DLISALVSGLLTIGSR-MGVLNGLFVLGR-	#
20140324-tam-191-2c	Pc13g05540 [Penicillium chrysogenum Wisconsin 54-1255]	gi%7c255935923 gi%7c211583608	20597	157	30	3	0.18	MGIDLDRHHVRSSHRKAPKSDNVYLKVLVKLYRFLARRTESNFNKAVLRRLFMSRINRPPVSLSRAVANISEAQKGKTVVVIGTVTDDNRLLTIPKLSIAALRFTATARARIEKAGGETLTLDQLALRAPTGANTLLLRGPKNAREAVKHFGFGPHTDKKPYVGSKGRKFERARGRRRSKGFKV	10	INRPPVSLSR-TVVVIGTVTDDNR-APTGANTLLLR-	#
20140324-tam-191-2c	60S ribosomal protein L18 [Byssochlamys spectabilis No. 5]	gi%7c557722591	20729	157	30	3	0.18	MGIDLDRHHVRSTHRKAPKSDNVYLQLLVKLYRFLARRTDANFNKVVLRRLFMSRINRPPVSLSRLVSNITEPHKGKTVVVIGTVTDDNRLLTVPKLSVAALRFTATARARIEKAGGETLTLDQLALRAPTGANTLLLRGPKNAREAVKHFGFGPHSGKKPYVQSKGRKFERARGRRRSRGFKV	10	INRPPVSLSR-TVVVIGTVTDDNR-APTGANTLLLR-	#
20140324-tam-191-2c	fructose-1_6-bisphosphatase [Aspergillus oryzae]	gi%7c9955389	38894	115	30	3	0.07	MSGHENNGAPPVGKEKINTDIVTLTRFLTEEQTKVPEATGDFTLLCHALQFSFKSIAYYIRCAFLINLTGLAGSSNTTGDDQKKLDVIGNDIFISAMRGSGKCRILVSEEEEEAIIFDEHPYARYAVVCDPIDGSSNLDAGVSVGTIFGIFKLPDSVLGPENKVSPKDLLLPGTEMVASGFTMYGASAQLVITMRNGGVNGFTLENSLGEFILTHPNMTLPAKRAIYSVNEGNSSYWEEWTNAYFHSLKFPPEGQKPYSARYIGSMVADAYRTLLYGGVFAYPADKKAPKGKLRILYECAPMAMLFENAGGLAVNSRMERLLGVVPEHIHDKSGVFLGSKDEVQKIIDTYNKYKK	10	SIAYYIR-YIGSMVADAYR-APKGKLR-	#
20140324-tam-191-2c	hypothetical protein ATEG_05891 [Aspergillus terreus NIH2624]	gi%7c115398960 gi%7c114191952	26201	94	29	3	0.09	MVADALLYHPALAHYLRFVATTVGRDKLLRTLQYFSRFYAWYLYRTNRPQSSIEPFNAIKKQFGTTRKILRIGKFIEHLKAAALAADNKSPIDPVLRYLAVGRQLGYAGYLTLDTITVVDAIGVRKLASAKRLQEHAYRAWMSGLVCSAIAGVYTIWRLQEKEKTIDRKEGEGVVEAKKLEKERAAARIQLISDMCDLTVPLSALGVSALDDGLVGIAGTVSSLIGVWSQWRKTA	9.66667	FVATTVGR-TLQYFSR-FYAWYLYR-	#
20140324-tam-191-2c	peroxisomal biogenesis factor (PEX11)_ putative [Neosartorya fischeri NRRL 181]	gi%7c119469001 gi%7c119406044	26059	94	29	3	0.09	MVADALVYHPALAHYLRFVATTVGRDKILRTLQYFSRFYAWYLYRTNRPQSAIDPYNAIKKQFGTTRKILRIGKFVEHLKAAALAADNKSPIDPVLRYLAIGRQLGYAGYLTLDTITVVDVIGVKKLAAAKRLQESAYRSWMAGLACSAVAGVYTLWRLQEKEKTLDRKEGEGVVEAKKLEKERAAARIQLISDLCDLTVPISALGLASLDDGIVGIAGTISSLIGVWAQWRKTA	9.66667	FVATTVGR-TLQYFSR-FYAWYLYR-	#
20140324-tam-191-2c	hypothetical protein HCAG_05677 [Ajellomyces capsulatus NAm1]	gi%7c154274442 gi%7c150414512 gi%7c325095951	26498	94	29	3	0.09	MAATDLAHHPTVAHYLRFVATTVGRDKILRTLQYFSRFYAWYLYRTNYPQASIAPFEAVKKQFALTRKLLRFGKNVEHFKAAAVLLDSRSPTATADPVLKYLGIGRQLGYAIYLSFDMVLYLDSAGVRKMANAKKLQARALKAWMAGLVCSAVSGLYSMWMLKEREKAVNKKDGESVVEGKMIEKERTAVLTQLVSDFCDLTIPSTSLGYINLDDGIIGLAGTVSSLIGVRTAWRKTA	9.66667	FVATTVGR-TLQYFSR-FYAWYLYR-	#
20140324-tam-191-2c	peroxin-11 [Paracoccidioides brasiliensis Pb18]	gi%7c226288177	26356	94	29	3	0.09	MVVTALAHHPTVAHYLRFVATTVGRDKVLRTLQYFSRFYAWYLYRTNNPQSAIAPFEAIKKQFGTTRKLLRFGKNIEHFKAAAVALDSRSPAANADPVLKYLGICRQLGYGIYLSFDMVSYLDSAGIRKFANAKKLQARAQRAWLTGLLCSALAGVYSLWMLKEREKAINKKDGESVVEGKKIEKERTAVLTQLVSDCCDITIPSSGLGYVNLDDGIIGLAGTISSLIGLQSAWRKTA	9.66667	FVATTVGR-TLQYFSR-FYAWYLYR-	#
20140324-tam-191-2c	peroxin 11 [Ajellomyces capsulatus H143]	gi%7c240277891	26528	94	29	3	0.09	MAATDLAHHPTVAHYLRFVATTVGRDKILRTLQYFSRFYAWYLYRTNYPQASIAPFEAVKKQFALTRKLLRFGKNVEHFKAAAVLLDSRSPTATADPVLKYLGIGRQLGYAIYLSFDMVLYLDSAGVRKMANAKKLQARALKAWMAGLVCSAVSGLYSMWMLKEREKTVNKKDGESVVEGKMIEKERTAVLTQLVSDFCDLTIPSTSLGYINLDDGIIGLAGTVSSLIGVRTAWRKTA	9.66667	FVATTVGR-TLQYFSR-FYAWYLYR-	#
20140324-tam-191-2c	peroxisomal biogenesis factor [Ajellomyces dermatitidis SLH14081]	gi%7c261198194 gi%7c239595462 gi%7c239615692 gi%7c327353981 gi%7c531983283	26294	94	29	3	0.09	MVVTALAHHPTVAHYLRFVATTVGRDKILRTLQYFSRFYAWYLYRTNNPQSSIAPFEAIKKQFALTRKLLRFGKNVEHFKAAAALLDSRSSTAPADPVLKYLGIGRQLGYAIYLSFDMVLYLDAAGMRKLANAKAMQARALRAWMAGLVCSALAGAYSLWILKEREKAVNKKDGESVVEGKKIQKERTAVVTQLVSDCCDLTIPSTTLGYVNLDDGIIGLAGTVSSLIGVRATWRKTA	9.66667	FVATTVGR-TLQYFSR-FYAWYLYR-	#
20140324-tam-191-2c	hypothetical protein AN1921.2 [Aspergillus nidulans FGSC A4]	gi%7c67522929 gi%7c40745930 gi%7c259487280	26066	94	29	3	0.09	MVADALVYHPALAHYLRFVATTVGRDKLLRTLQYFSRFYAWYLYRTNQPQTAIAPYNAVKKQFGTTRKILRIGKFIEHLKAAALAADNKGPIDPVLRYLAIGRQLGYAGYLSLDTVTVVDVIGFRKLASVKRLQDSAYRAWFSGLACSVLAGVYTLWRLSQKQKTLDLKEGEGVVEAKKLEKERSAARIQLISDLCDLTVPVSAIGLANLDDGLVGIAGTISSLIGVWSQWRKTA	9.66667	FVATTVGR-TLQYFSR-FYAWYLYR-	#
20140324-tam-191-2c	peroxisomal biogenesis factor (PEX11) [Aspergillus fumigatus Af293]	gi%7c70991633 gi%7c66848298	26103	94	29	3	0.09	MVADALVYHPALAHYLRFVATTVGRDKILRTLQYFSRFYAWYLYRTNRPQSAIDPYNAIKKQFGTTRKILRIGKFVEHLKAAALAADNKSPIDPVLRYLAIGRQLGYAGYLTLDTITVVDVIGVKKLATAKRLQESAYRSWMAGLACSAIAGVYTLWRLQEKEKTLDRKEGEGVVEAKKLEKERAAARIQLISDLCDLTVPISALGLASLDDGIVGIAGTISSLIGVWAQWRKTA	9.66667	FVATTVGR-TLQYFSR-FYAWYLYR-	#
20140324-tam-191-2c	hypothetical protein ATEG_05891 [Byssochlamys spectabilis No. 5]	gi%7c557723727	26197	91	29	3	0.09	MVADAVVYHPAVAHYLRFVATTVGRDKLLRTLQYFSRFYAWYLYRTNRPKTDIAPFEAIKKQFGLTRKILRIGKFIEHFKAAAVAYDNKGPIDPILRYLAVGRQLGYAGYLSLDTITVIDAIGVKKLSSAKRLQESAYRSWLAGLTFSAIAGVYSLWKLQQREKLVDRKEGEGVVELKKIEKERAAARIQLFSDLCDITAPLAGANIVPLDDGIVGLAGTVSSLLGVWSAWKKTA	9.66667	FVATTVGR-TLQYFSR-FYAWYLYR-	#
20140324-tam-191-2c	vacuolar serine protease [Penicillium oxalicum]	gi%7c12005497 gi%7c525588182	53258	186	23	3	0.07	MKGLLSLTLLPLLAAASPTWSETIHNGAAPLISSTSAKEIPDSYIVVFKKHVGASAASAHHSWVQDIHSDNVRMELKKRSLFGFESEPYLGVKHTFHVAGSLMGYAGHFHEDVIEQVRRHPDVEYIEKDSEVHHFEDPAIEKNAPWGLARISHRDSLSFGSFNKYLYAEDGGEGVDAYVIDTGTNVDHVDFEGRASWGKTIPQGDQDVDGNGHGTHCSGTIAGKKYGVAKKANVYAVKVLRSNGSGTMSDVVKGVEWAAEAHIKKSKAAKDGKAKGFKGSVANMSLGGGSSRTLDLAVNAAVDAGMHFAVAAGNDNADACNYSPAAAEKAVTVGASTLADERAYFSNYGKCTDIFAPGLNILSTWIGSKYAVNTISGTSMASPHIAGLLAYYVSLQPAS…	7.66667	DSLSFGSFNK-GSVANMSLGGGSSR-AVTVGASTLADER-	#
20140324-tam-191-2c	60S ribosomal protein L10 [Neosartorya fischeri NRRL 181]	gi%7c119480781 gi%7c119408573	25615	144	23	3	0.12	MARRPARCYRYCKNKPYPKSRFNRGVPDPKIRIFDLGRKKANVDDFPLCVHMVSNEYEQLSSEALEAARICANKYLVKITGKEGFHMRVRVHPFHVIRINKMLSCAGADRLQTGMRGAFGKPQGTVARVNIGQIILSVRTRDSNRAAAIEALRRAMYKFPGRQKIIVSKNWGFTPVRREDYIQLRNEGKLKQDGAYVQFLRGHGLIEENMKRFPSAYENLSQA	7.66667	VNIGQIILSVR-AAAIEALR-NWGFTPVR-	#
20140324-tam-191-2c	60S ribosomal protein L10 [Aspergillus niger CBS 513.88]	gi%7c145246616 gi%7c134080275 gi%7c350636902	25594	144	23	3	0.12	MARRPARCYRYCKNKPYPKSRFNRGVPDPKIRIFDLGRKKANVDDFPLCVHLVSNEYEQLSSEALEAARICANKYLVKIAGKEGFHLRVRVHPFHVIRINKMLSCAGADRLQTGMRGAFGKPQGTVARVNIGQIILSVRTRDTNRAAAIEALRRSMYKFPGRQKIIVSKNWGFTPVRREDYVQLRQEGKLKQDGAYVQFLRGHGLIEENMKRFPDAYENVSQA	7.66667	VNIGQIILSVR-AAAIEALR-NWGFTPVR-	#
20140324-tam-191-2c	60S ribosomal protein L10 [Aspergillus oryzae RIB40]	gi%7c169783782 gi%7c83775097 gi%7c391869427	25389	144	23	3	0.12	MARRPARCYRYCKNKPYPKSRFNRGVPDPKIRIFDLGRKKANVDDFPLCVHMVSNEYEQLSSEALEAARICANKYLVKITGKEGFHMRVRVHPFHVIRINKMLSCAGADRLQTGMRGAFGKPQGTVARVNIGQIILSVRTRDSNRAAAIEALRRSMYKFPGRQKIVVSKNWGFTPVRREDYIQLRNEGKLKQDGAYVQFLRGHGLVENNMKRFPDAYESQA	7.66667	VNIGQIILSVR-AAAIEALR-NWGFTPVR-	#
20140324-tam-191-2c	60S ribosomal protein L10 [Aspergillus kawachii IFO 4308]	gi%7c358369887	25549	144	23	3	0.12	MARRPARCYRYCKNKPYPKSRFNRGVPDPKIRIFDLGRKKANVDDFPLCVHLVSNEYEQLSSEALEAARICANKYLVKIAGKEGFHLRVRVHPFHVIRINKMLSCAGADRLQTGMRGAFGKPQGTVARVNIGQIILSVRTRDANRAAAIEALRRSMYKFPGRQKIIVSKNWGFTPVRREDYVQLRQEGKLKQDGAYVQFLRGHGLVEENMKRFPDAYENVSQA	7.66667	VNIGQIILSVR-AAAIEALR-NWGFTPVR-	#
20140324-tam-191-2c	60S ribosomal protein L10 [Aspergillus fumigatus Af293]	gi%7c71001148 gi%7c66852893 gi%7c159129339	25570	144	23	3	0.12	MARRPARCYRYCKNKPYPKSRFNRGVPDPKIRIFDLGRKKASVDDFPLCVHMVSNEYEQLSSEALEAARICANKYLVKITGKEGFHLRVRVHPFHVIRINKMLSCAGADRLQTGMRGAFGKPQGTVARVNIGQIILSVRTRDSNRAAAIEALRRAMYKFPGRQKIIVSKNWGFTPVRREDYIQLRNEGKLKQDGAYVQFLRGHGLIEENMKRFPSAYENLSQA	7.66667	VNIGQIILSVR-AAAIEALR-NWGFTPVR-	#
20140324-tam-191-2c	Pc21g16950 [Penicillium chrysogenum Wisconsin 54-1255]	gi%7c255955885 gi%7c211590406 gi%7c300679427	35418	108	20	3	0.09	MSSSLEQLKASGTTVVCDSGDFATIGKYKPQDATTNPSLILAASKKPEYAALIDTAVAYGKQNGKTLDEQVEATLDRLLVEFGKEILKIIPGKVSTEVDAKLSFDTQGSVNKALEIIKLYADNGISKDRVLIKIASTYEGIKAAHILQTQHGINCNLTLMFSLVQAIAAAEAGAYLISPFVGRILDWYKAAHKRDYTPQEDPGVKSVQDIYNYYKKFGYNTIVMGASFRNVGEITELAGCDYLTISPNLLEDLFNSTDAVPQKLNPAGAASLEIKKREYLNNEADFRFDFNEEAMGVEKLREGISKFAADAVTLKQLLAQKIQA	6.66667	IASTYEGIK-FDFNEEAMGVEK-FAADAVTLK-	#
20140324-tam-191-2c	Pc22g00520 [Penicillium chrysogenum Wisconsin 54-1255]	gi%7c255946660 gi%7c211591114	34185	104	18	3	0.09	MSTSTTPTQELKDELKVVETKAVNQTIVQLRSLAAGAAGGLCAVIVGHPFDLVKVRLQTAEKGIYSGAMDVVRKTVAREGLARGLYAGVSAPLVGVTPMFAVSFWGYDVGKTLVNKFSTVPIKNDTPQYSIAQISSAGFFSAIPMTLITAPFERVKVLLQIQGQKTLAPGEKPKYSGGMDVVRQLYKEGGVRSVFRGSAMTLARDGPGSAAYFAAYEYIKRSLTPKDAEGNVTGELSLSAVVCAGGAAGIAMWIPVFPVDTVKSRLQSAPGKPTMSGVIRSVYASGGFKAFFPGFGPALARAVPANAATFLGVELAHKGMKKLFD	6	GIYSGAMDVVR-GSAMTLAR-AFFPGFGPALAR-	#
20140324-tam-191-2c	conserved hypothetical protein [Aspergillus terreus NIH2624]	gi%7c115391461 gi%7c114194159	37790	134	17	3	0.08	MSTAETLTPTNGKAPAQPIDHAHAHASRLVNVQPARLADLQPRYAQRLEHDEENPEAHGWYAGLIHGLGECIGFLGAIPCCICCPNPYKPVAQGEVGLVSKFGRFERAVDPGLVKVNPLSEHLTAVDVKIQIVEVPRQVCMTKDNVTLNLTSVIYYQIISPHKAAFGITNVRQALVERTQTTLRHVIGARVLQDVIERREEIAQSTSEIIEDVAAGWGVQVESMLIKDIIFSNDLQDSLSMAAQSKRIGESKVIAARAEVESAKLMRQAADILSSAPAMQIRYLEAMQSMAKTANSKVIFLPAMNQTVQQQLAAAENAGEGPSRYGSGSQVDEGFQRAMNARVVEDI	5.66667	IQIVEVPR-VLQDVIER-QAADILSSAPAMQIR-	#
20140324-tam-191-2c	stomatin family protein [Neosartorya fischeri NRRL 181]	gi%7c119490929 gi%7c119411285	37405	134	17	3	0.08	MSTEANIPNGKAPVQSAPGHSAHTRGPVVVQPARLADLQPSYAQQIQHNADNPDAHSWYASLIHTLGECIGGLGAIPCCICCPNPFKPVAQGEVGLVTKFGRFERAVDPGLVRVNPLSEHLTTVDVKIQIVEVPRQVCMTKDNVTLNLTSVIYYQIISPHKAAFGISNVRQALIERTQTTLRHVIGARVLQDVIERREEIAQSTSEIIEEVAAGWGVLVESMLIKDIIFSNDLQDSLSMAAQSKRIGESKVIAARAEVESAKLMRQAADILSSAPAMQIRYLEAMQAMAKTANSKVIFLPAVNQTVQQQLAAADNAGEGPSNYGAGQPVQADDGFQRAINARVVEDI	5.66667	IQIVEVPR-VLQDVIER-QAADILSSAPAMQIR-	#
20140324-tam-191-2c	stomatin family protein [Talaromyces marneffei ATCC 18224]	gi%7c212526880 gi%7c210072995	38116	134	17	3	0.08	MASSINTSTNGNGKAPQAAGNRPANSLVQVQPARAEDLQPRYAQQIKHDDDNPDAHGWYASMIHGLGECIGCLGAIPCCVFCPNPFKPVAQGEVGLIQRFGRFERAVDPGLVKVNPLSERLRTVDVKIQIVEVPRQVCMTKDNVTLNLTSVIYYHIVAPHKTAFGITDVRQALIERTQTTLRHVVGARVLQDVIERREEIAQSISEIIEDVAAGWGVKVESMLIKDIIFSNDLQDSLSMAAQSKRIGESKVIAARAEVESAKLMRQAADILSSAPAMQIRYLEAMQAMAKTANSKVIFLPAPGQTVSQQLSLAENLGEGPSRYQNQDHSYENEDGFQRAINARVVENI	5.66667	IQIVEVPR-VLQDVIER-QAADILSSAPAMQIR-	#
20140324-tam-191-2c	stomatin family protein [Talaromyces stipitatus ATCC 10500]	gi%7c242782030 gi%7c218720067	38808	134	17	3	0.08	MASSVTNPPSTNGHTSANGKAPQVPTNQASLVHVQPARVEDLQPRYAQQIKHDDDNPDAHGWYASMIHGLGECMGCLGAIPCCLLCPNPFKSVAQGEVGLISRFGRFERAVDPGLVKVNPLSERLTTVDVKIQIVEVPRQVCMTKDNVNLNLTSVIYYHIISPHKTAFGIADVRQALVERTQTTLRHVVGARVLQDVIERREEIAQSISEIIEDVAAGWGVKVESMLIKDIIFSNDLQDSLSMAAQSKRIGESKVIAARAEVESAKLMRQAADILSSAPAMQIRYLEAMQAMAKTANSKVIFLPAPGQTVSQQLSLAENLGEGPSKYQTLDNNWNTGNENDDGFQRAVNARVVENI	5.66667	IQIVEVPR-VLQDVIER-QAADILSSAPAMQIR-	#
20140324-tam-191-2c	hypothetical protein PDIG_21460 [Penicillium digitatum PHI26]	gi%7c425778021 gi%7c425781395	37724	134	17	3	0.08	MSENGGSTSKDPVTDRRVHQPLVDVQPFRMSDLQPKYAHQINHADDNPDAHGWYAGLIHSLGECIGFFGAIPCCICCPNPFKPVDQGAVGLISRFGRFERSVDPGLVKINPLSEHIITVDVKIQIVEVPRQVCMTKDNVTLNLTSVIYYQVVSPHKTAFGISNVRQALIERTQTTLRHVIGARVLQDVIERREEIAQSTSEIIEEVAAGWGVKVESMLIKDIIFSNDLQDSLSMAAQSKRIGESKVIAARAEVESAKLMRQAADILSSAPAMQIRYLEAMQAMAKTANSKVIFLPGLAPNAPGPSLQTQLNTAENFGEGPSKYGTISQGDTGLQHAFNARVFEDI	5.66667	IQIVEVPR-VLQDVIER-QAADILSSAPAMQIR-	#
20140324-tam-191-2c	hypothetical protein EPUS_04771 [Endocarpon pusillum Z07020]	gi%7c539436629	36903	134	17	3	0.09	MDSPDHSKSMENGKAPAQSGNVGFRPTNSGIVKVQPPRREDLQPSYAQTLVFETEAVHGWYGSMINALGSTPNPYKPVSQGNVGLVTKFGKFSRAVDPGLVKVNPLSERLIQVDVKIQIVEVPRQVCMTKDNVTLNLTSVIYYHIVSPHKAAFGISNIRQALVERTQTTLRHVVGARVLQDVIERREEIAQSIGEIIEDVAFGWGVQVESMLIKDIIFSNDLQDSLSMAAQSKRIGESKVIAARAEVESAKLMRQAADILSSAPAMQIRYLEAMQAMAKSANSKVIFLPGPSTSQTVQSQLASADQAGEGPSKYGANSPFSGDTNDGFQQAMNARVIENI	5.66667	IQIVEVPR-VLQDVIER-QAADILSSAPAMQIR-	#
20140324-tam-191-2c	conserved hypothetical protein [Byssochlamys spectabilis No. 5]	gi%7c557726681	37874	134	17	3	0.08	MSAPTDATSSNGKAAVPENPNVGFRPANVVKVQPARLDDLQPKYAQRIQHSEENPEAHGWYAGMIHSLGGCIGFLGAIPCCFCCPNPFKDVKQGEVGLVSKFGRFERAVDPGLVNINPLSEKLITVDVKIQIVEVPRQVCMTKDNVTLNLTSVIYYHITSPHKAAFGITNVRQALVERTQTTLRHVVGARVLQDVIERREEIAQSIGEIIEDVASGWGVQVESMLIKDIIFSDDLQDSLSMAAQSKRIGESKVIAARAEVESAKLMRQAADILSSAPAMQIRYLEAMQSMAKSANSKVIFLPAPNQTIQQQFEQADNAGEGPSRYGGPASSNDDGFQRAINARVVENI	5.66667	IQIVEVPR-VLQDVIER-QAADILSSAPAMQIR-	#
20140324-tam-191-2c	hypothetical protein AN3163.2 [Aspergillus nidulans FGSC A4]	gi%7c67525411 gi%7c40744558	32588	134	17	3	0.1	MSAESSTAINTAANTGVNGKATQQPHGLVEVQPPRLSDLQPRYASTIEHDDSNPEAHGWYASFNPGLVKVNPLSERLITIDVKIQIVEVPRQICMTKDNVTLNLTSVIYYQVVSPHKAAFGISNIKQALVERTQTTLRHVIGARVLQDVIERREEIAQSTSEIIEEVASGWGVNVESMLIKDIIFSDDLQDSLSMAAQSKRIGESKVIAARAEVESAKLMRQAADILSSAPAMQIRYLEAMQAMAKTANSKVIFLPAPNQTVQQQLAAAENAGEGPSRYAPPQGGDGFQHAINARVVEDI	5.66667	IQIVEVPR-VLQDVIER-QAADILSSAPAMQIR-	#
20140324-tam-191-2c	stomatin family protein [Aspergillus fumigatus Af293]	gi%7c70999113 gi%7c66851915 gi%7c159127296	37442	134	17	3	0.08	MATEANIPNGKAPVHSAPGHSAHTRGPVVVQPARIDDLQPSYAQQIQHNADNPDAHSWYASLIHTLGECIGGLGAIPCCICCPNPFKPVAQGEVGLVTKFGRFERAVDPGLVKVNPLSEHLTTVDVKIQIVEVPRQVCMTKDNVTLNLTSVIYYQIISPHKAAFGISNIRQALIERTQTTLRHVIGARVLQDVIERREEIAQSTSEIIEEVAAGWGVLVESMLIKDIIFSNDLQDSLSMAAQSKRIGESKVIAARAEVESAKLMRQAADILSSAPAMQIRYLEAMQAMAKTANSKVIFLPAVNQTVQQQLAAADNAGEGPSKYGAGQPVQADDGFQRAINARVVEDI	5.66667	IQIVEVPR-VLQDVIER-QAADILSSAPAMQIR-	#
20140324-tam-191-2c	hypothetical protein FOXB_14949 [Fusarium oxysporum Fo5176]	gi%7c342872107	62829	123	17	3	0.04	MSHVNLLKAARPAWRASTAISKAAIRPFSVSRQLGTPPILLEDKDKGFGFIRHNKRPPKPRSVGVTEIRGPYYSVMGKRYLQDVLETMGHHVDGLKFAGGSFSLFPEDKLKELINLAHEYNVYVSTGGWMEHVLLQSDPAWAVDQYLKKCKQLGFDVIEISSGFLSIPQDDWLRIVDKVHSAGLIAKPECGIQFGAGGDTEASELSSLGTSDPSKIIHMGKRFIDAGVERIMIESEGITENVKSWRTDVIQQILRELPQEKVMFEAADPKVFNWYLRSGKDGSFHPVPEAQAQKLPGTEKDMNPTSESTKLEGKDEFHEYRAANKLEGAKALITGGDSGIGRSVAVLFAREGADVTIVYLPEEQEDAEETKRMVEKEGHKCLLFAGNLMDNETCKNAVQ…	5.66667	FIDAGVER-VFNWYLR-ALITGGDSGIGR-	#
20140324-tam-191-2c	S9 ribosomal protein [Capsaspora owczarzaki ATCC 30864]	gi%7c470288019	23415	121	16	3	0.11	MYITVPSDLPNVASWLVAPVECSKTVKTPRRPYEKERLDRELKLVGEFGLRNKSEVWRVQLTLAKIRKAARELLTLDDKDSRRLFEGNALLRRLVRIGVLDESRMRLDFVLGLKVEDFLERRLQTQVFKLGLAKSIHHARVLIRQRHIRVGKQIVNVPSFVVRLDSQKHIDFALNSPFGGGRAGRNKRKASKKADAPAEEADEE	5.33333	LFEGNALLR-IGVLDESR-VEDFLER-	#
20140324-tam-191-2c	S9 [Suberites domuncula]	gi%7c61654718	22240	121	16	3	0.12	MPQIVCSKTYHTPRRPFEKARLDQELKIIGQYGLRNKREVWRVKYTLAKIRKAARELLTLDEKSPKRLFEGNALLRRMVRIGVLDESRMKLDYVLGLKVEDFLERRLQTQVFKLGLAKSIHHARVLIKQRHIRVRKQIVNVPSFVVRLDSQKHIDFALTSPFGGGREGRVKRKNAKKGQAGAADEEEEEDD	5.33333	LFEGNALLR-IGVLDESR-VEDFLER-	#
20140324-tam-191-2c	60S ribosomal protein L24 [Chaetomium globosum CBS 148.51]	gi%7c116193141 gi%7c88182201	18074	119	16	3	0.16	MRTYDDSFSGQRIYPGKGKLYVRGDSKIFRFQNGKSESLFLQRKNPRRIAWTVLYRRQHRKGISEEVAKKRTRRTVKSQRAIVGASLDVIKERRSIRPETRSAARLAAIKESKEKRQAEQAAKKAEKAKNAAAASKGQSGGRIVGKQGAKGAQQKVAANTR	5.33333	SESLFLQR-IAWTVLYR-AIVGASLDVIK-	#
20140324-tam-191-2c	60S ribosomal protein L24 [Aspergillus clavatus NRRL 1]	gi%7c121704046 gi%7c119398431	17906	119	16	3	0.16	MRTYDDSFSGQKIYPGKGKLYVRGDSKIFRFQNGKSESLFLQRKNPRRIAWTVLYRRQHKKGISEEVAKKRTRRAVKSQRAIVGASLDVIKERRSMRPEARAAARQQAIKEAKEKKAASESRKKAEKAKTAAGAAKGTAQRIQSKQGAKGSAPKVAAKSR	5.33333	SESLFLQR-IAWTVLYR-AIVGASLDVIK-	#
20140324-tam-191-2c	60S ribosomal protein L24 [Sordaria macrospora k-hell]	gi%7c336267232 gi%7c380092035	17555	119	16	3	0.17	MRTYDDTFSGQRIYPGKGKLYVRGDSKIFRFQNGKSESLFLQRKNPRRIAWTVLYRRQHKKGISEEVAKKRSRRTVKAQRAIVGASLDVIKERRSMRPEARSAARLAAIKDAKAKKQESQAAKKAEKAKNAANPKGRVTSKQGAKGAHVKVAANSR	5.33333	SESLFLQR-IAWTVLYR-AIVGASLDVIK-	#
20140324-tam-191-2c	60S ribosomal protein L24a [Aspergillus kawachii IFO 4308]	gi%7c358371063	61737	119	16	3	0.04	MNNEDNMDTSGEATDQPHAFHEESEDPVSHLTQLTDDITSQLAGAFHITDHHDDPLFFPALFTNPLNMTATEQDLREDPSAMSLDSSPQTLHSVFGAGAKPNTQQSSSTSAGSQEINDTTAAARNLAGILKKNKGAKTGKKVQFAASPGKVVKCYKSSPAMASWLRPLKSVLEYVWPQERQTAKQDKKVIVFRRANLVDRESDKDEDKDEEGAGTDYHDSSPVGRASSIDDLVGYIRQTTACTKQTRNPKEDWKRKRSGDTRIWNYRNPWCTKCYGECPLCGSACCVYEELRRAVADEGTDPLVARDRRRLMGLMESVAESMSARPVAEYARTGLAETYSASTYIPIPKIWRSRGGSQPAKGRAGHSHEQLAAETASTQPPNANRQHLVSTGCASQTFK…	5.33333	SESLFLQR-IAWTVLYR-AIVGASLDVIK-	#
20140324-tam-191-2c	60S ribosomal protein L24 [Thielavia terrestris NRRL 8126]	gi%7c367042528 gi%7c346998906	18039	119	16	3	0.16	MRTYDDSFSGQRIYPGKGKLYVRGDSKIFRFQNGKSESLFLQRKNPRRIAWTVLYRRQHRKGISEEVAKKRTRRTVKSQRAIVGASLDVIKERRSMRPEARSAARLAAIKESKEKKQAAQAAKKAEKAKLAAQAAKGQPQGRIASKQGAKGAPVKVAAKSR	5.33333	SESLFLQR-IAWTVLYR-AIVGASLDVIK-	#
20140324-tam-191-2c	hypothetical protein OOU_Y34scaffold00666g76 [Magnaporthe oryzae Y34]	gi%7c440466974 gi%7c440484562	17643	119	16	3	0.17	MEGVNEADLWSCTFLLQGKLYVRGDSKIFRFQNGKSESLFLQRKNPRRIAWTVLYRRAHRKGISEEVAKKRTRRTVKSQRAIVGASLDVIKERRTMRPEARSAARAAAIKESKARKAEAEKAKKAEKAKVAGGKGQTGRLTSKQGAKGAQQKVAANTR	5.33333	SESLFLQR-IAWTVLYR-AIVGASLDVIK-	#
20140324-tam-191-2c	hypothetical protein AN8704.2 [Aspergillus nidulans FGSC A4]	gi%7c67903434 gi%7c40741063 gi%7c259483102	17856	119	16	3	0.16	MRTYDDSFSGQKIYPGKGKLYVRGDSKIFRFQNGKSESLFLQRKNPRRIAWTVLYRRQHKKGISEEVAKKRTRRVVKSQRAIVGASLDVIKERRSQRPEARAAARQQAIKDAKEKKAAAESKKKAEKAKNAAAGAKGAAQRIQSKQGAKGSAPKVAAKSR	5.33333	SESLFLQR-IAWTVLYR-AIVGASLDVIK-	#
20140324-tam-191-2c	60S ribosomal protein L24a [Aspergillus fumigatus Af293]	gi%7c70984653 gi%7c119467248 gi%7c66845460 gi%7c119405582 gi%7c159122617	18041	119	16	3	0.16	MRTYDDSFSGQKIYPGKGKLYVRGDSKIFRFQNGKSESLFLQRKNPRRIAWTVLYRRQHKKGISEEVAKKRTRRVVKHQRAIVGASLDVIKERRSMRPEARAAARQQAIKEAKEKKAASESRKKAEKAKNAATAAKGTAQRIQSKQGAKGSAPKVAAKSR	5.33333	SESLFLQR-IAWTVLYR-AIVGASLDVIK-	#
20140324-tam-191-2c	hypothetical protein MGCH7_ch7g456 [Magnaporthe oryzae 70-15]	gi%7c86196411	17615	119	16	3	0.17	MEGVNEADLWSCTFLLQGKLYVRGDSKIFRFQNGKSESLFLQRKNPRRIAWTVLYRRAHRKGISEEVAKKRTRRTVKSQRAIVGASLDVIKERRTMRPEARSAARAAAIKESKAKKAEAEKAKKAEKAKVAGGKGQTGRLTSKQGAKGAQQKVAANTR	5.33333	SESLFLQR-IAWTVLYR-AIVGASLDVIK-	#
20140324-tam-191-2c	14-3-3 protein [Aspergillus oryzae RIB40]	gi%7c169779057 gi%7c83772732 gi%7c391869373	29116	106	16	3	0.08	MGHEDAVYLAKLAEQAERYEEMVENMKVVASADVELTVEERNLLSVAYKNVIGARRASWRIVTSIEQKEESKGNESQVTLIKEYRQKIESELAKICDDILEVLDKHLIPSAQSGESKVFYHKMKGDYHRYLAEFAIGDRRKGAADASLEAYKAATEVAQTDLAPTHPIRLGLALNFSVFYYEILNSPDQACHLAKLAFDDAIAELDTLSEESYKDSTLIMQLLRDNLTLWTSSEAEPAAENASTEKKEEAPAAEGEKPAAE	5.33333	YLAEFAIGDR-YLAEFAIGDRR-GAADASLEAYK-	#
20140324-tam-191-2c	14-3-3-like protein [Aspergillus flavus]	gi%7c38490697	28471	106	16	3	0.08	MGHEDAVYLAKLAEQAERYEMVENMKVVASADVELTVEERNLLSVVYKNVIGARRASWRIVTSIEQKEESKGNESQVTLIKEYRQKIESELAKICDDILEGLDKHLIPSGQSGESKGFYHKIGDYHRYLAEFAIGDRRKGAADASLEAYKAATEVAQTDLTPTHPIRLGLALNFSVFYYEILNSPGQACHLAKLAFDDAIAELDTLSEESYKDSTLIMQLLRDNLLDTLSEESYKDSTLIMQLLRDNHPLDLV	5.33333	YLAEFAIGDR-YLAEFAIGDRR-GAADASLEAYK-	#
20140324-tam-191-2c	hypothetical protein DOTSEDRAFT_74912 [Dothistroma septosporum NZE10]	gi%7c452838322	14134	118	14	3	0.22	MVKKRASNGRNKKGRGHVKPIRCSNCSRCTPKDKAIKRFTIRNMVESAAIRDISDASVFAEYSVPKMYLKLQYCVSCAIHGKIVRVRSREGRRNRAPPPRVRYNKDGKKVNPAQTTNKPLGAQASA	4.66667	FTIRNMVESAAIR-NMVESAAIR-DISDASVFAEYSVPK-	#
20140324-tam-191-2c	Acetyl-CoA carboxylase_ biotin containing enzyme [Komagataella pastoris GS115]	gi%7c254566509 gi%7c238030161	247821	134	13	3	0.01	MSSVNHSLRHSKLPPHFLGLNSVEVAAPSKVRDFVRDHGGHSVITRVLIANNGIAAVKEIRSVRKWAYETFGNDRAIQFIVMATPEDLEANAEYIRMADQYVMVPGGTANNNYANVDLIVEIAESTDAHAVWAGWGFASENPHLPEQLAASPKKIIFIGPPGSAMRSLGDKISSTIVAQHAKVPCIPWSGTGVDQVIIDPVSNLVSVDEETYAKGCCSDPQDGLAKAKAIGFPVMIKASEGGGGKGIRKVDREEDFLSLYDQAANEIPGSPIFIMKLAGDARHLEVQLLADQYGTNISLFGRDCSVQRRHQKIIEEAPVTIAKQDTFRQMEQAAVRLGQLVGYVSAGTVEYLYSHAEDKFYFLELNPRLQVEHPTTEMATGVNLPVAQLLIAMGIPLNR…	4.33333	NTSCIDRR-IYLSANSGAR-SVGIGAYLVR-	#
20140324-tam-191-2c	hypothetical protein CANTEDRAFT_104659 [Candida tenuis ATCC 10573]	gi%7c344232082	69535	122	11	3	0.05	MSKAVGIDLGTTYSCVAHFSNDRVEIIANDQGNRTTPSFVAFTDSERLIGDAAKNQAAMNPANTVFDAKRLIGRKFDDAEVQGDIKHFPFKVVNKGGKPQIEVDFKGETKVFTPEEVSSMILTKMKETAESFLGATVNDAVVTVPAYFNDSQRQATKDAGLIAGLNVLRIINEPTAAAIAYGLDKKDEQEKNVLIFDLGGGTFDVSLLSIEDGIFEVKSTAGDTHLGGEDFDHRLVNHFINEFKRKNKKDLAGNQRALRRLRTACERAKRTLSSSAQTSIEIDSLYEGIDFYTSITRARFEELCQDLFRSTLDPVEKVLVDAKVDKSQVDEIVLVGGSTRIPKVQKLVSDFFNGKEPNKSINPDEAVAYGAAVQAAILSGDTSSKVQDLLLLDVAPLSL…	3.66667	VEIIANDQGNR-TTPSFVAFTDSER-DAGLIAGLNVLR-	#
20140324-tam-191-2c	40S ribosomal protein S2 [Aspergillus oryzae RIB40]	gi%7c169785585 gi%7c238506609 gi%7c83776001 gi%7c220689219 gi%7c391866451	28257	107	10	3	0.11	MADAAPRGRGGFGSRGDRGGDRGRGRGRRGRRGGKQEEKEWQPVTKLGRLVKAGKITSMEQIYLHSLPIKEYQIVDFFLPKLKDEVMKIKPVQKQTRAGQRTRFKAVVIIGDSEGHIGLGIKTSKEVATAIRAAITIAKLAVLPVRRGYWGSNLGEPHSLPVKQSAKCGSVSVRLIPAPRGTGLVASPAVKRLLQLAGVQDAYTSSSGSTKTLENTLKATFLAVVNTYGFLTPNLWKETKLIRSPLEEFGDVLRQGKKY	3.33333	LAVLPVR-GTGLVASPAVK-SPLEEFGDVLR-	#
20140324-tam-191-2c	Pc21g13620 [Penicillium chrysogenum Wisconsin 54-1255]	gi%7c255955253 gi%7c211590090	28298	107	10	3	0.11	MADAAPRGRGGFGSRGDRGGERGRGRGGRRGRRGPKQEEKEWQPVTKLGRLVKAGKITSMEQIYLHSLPVKEYQIVDFFLPKLKDEVMKIKPVQKQTRAGQRTRFKAIVLIGDSEGHIGLGIKTSKEVATAIRAAITIAKLAVLPVRRGYWGTNLGEPHSLPVKQSGKCGSVSVRLIPAPRGTGLVASPAVKRLLQLAGVQDAYTSSSGSTKTLENTLKATFVAVVNTYGFLTPNLWAENKLTRSPLEEFGDVLRQGKKY	3.33333	LAVLPVR-GTGLVASPAVK-SPLEEFGDVLR-	#
20140324-tam-191-2c	hypothetical protein PDIP_55350 [Penicillium digitatum Pd1]	gi%7c425773284 gi%7c425778931	28310	107	10	3	0.11	MADAAPRGRGGFGSRGDRGGERGRGRGGRRGRRGPKQEEKEWQPVTKLGRLVKAGKITSMEQIYLHSLPVKEYQIVDFFLPKLKDEVMKIKPVQKQTRAGQRTRFKAIVLIGDSEGHIGLGIKTSKEVATAIRAAITIAKLAVLPVRRGYWGTNLGEPHSLPVKQSGKCGSVSVRLIPAPRGTGLVASPAVKRLLQLAGVQDAYTSSSGSTKTLENTLKATFVAVVNTYGFLTPNLWAENKLIRSPLEEFGDVLRQGKKY	3.33333	LAVLPVR-GTGLVASPAVK-SPLEEFGDVLR-	#
20140324-tam-191-2c	hypothetical protein PDE_05983 [Penicillium oxalicum 114-2]	gi%7c525584779	28197	107	10	3	0.11	MADAAPRGRGGFGSRGDRGGDRGRGRRGRGRRGGKQEEKEWQPVTKLGRLVKAGKITSMEQIYLHSLPVKEYQIVDFFLPKLKDEVMKIKPVQKQTRAGQRTRFKAIVLIGDGEGHIGLGIKTSKEVATAIRAAITIAKLAVLPVRRGYWGTNLGEPHSLPVKQSGKCGSVAVRLIPAPRGTGLVASPAVKRLLQLAGVQDAYTSSSGSTKTLENTLKATFVAVVNTYGFLTPNLWKETKLIRSPLEEFGDVLRQGKKY	3.33333	LAVLPVR-GTGLVASPAVK-SPLEEFGDVLR-	#
20140324-tam-191-2c	GTP-binding protein YchF [Neosartorya fischeri NRRL 181]	gi%7c119496025 gi%7c119412948	43350	132	9	3	0.06	MPPKKAVVQEKVLLGRPGNNLKSGIVGLANVGKSTLFQAITKSSLGNPANFPYATIDPEEARVIVPDERFDWLCEHYKPKSQVPANLTVYDIAGLTRGASTGAGLGNAFLSHIRAVDAIFQVVRCFDDAEIIHVEGDVDPVRDLTIISEELRIKDIEFVEKALESLSKQTKRGGQSLEMKKLREEEATVAKVLQFLKDGNDVRKGDWAPKEVEVINPLFLLTAKPVVYLVNLSEKDYIRQKNKYLPKVFEWIQKNSPGDPLIPISVSFEERLAAFGDDAKAAEECKALNTKSALPKVIVTMRQVLNLASFFTTGADEVRQWTIRKGTKAPAAAGVIHTDFEKTFIQAIVYNYTTLREYGDEAAVKAAGKIMTKGKDYVVEDGDILLIKAGAAKG	3	VIVPDER-AVDAIFQVVR-DLTIISEELR-	#
20140324-tam-191-2c	hypothetical protein PDE_07071 [Penicillium oxalicum 114-2]	gi%7c525585862	43305	132	9	3	0.06	MPPKKAQVQEKVLLGRPGNNLKSGIVGLANVGKSTLFQSITKSSLGNPANFPYATIDPEEARVIVPDERFDWLCEHYKPKSQVPANLTVYDIAGLTRGASTGAGLGNSFLSHIRAVDAIFQVVRCFDDAEIIHVEGDVDPVRDLTIISEELRIKDIEFVEKALEALSKQTRRGGQSLEMKKLKEEEATTAKVLQWLQDGKDIREGEWGPKEVEVINPLFLLTAKPVVYLVNLSEKDFIRKKNKYLPKLFEWVKEKSPTSPILPISAQFEERLTQLGDEAAAEECKKLGTASGLPKVITTMRQALNLASFFTTGADEVRQWTIRKGTKAPSAAGVIHTDFEKTFIQAIVYNYSVLKELGDEAAVKAAGKIMTKGKDYVVEDGDIMLIKAGAAKS	3	VIVPDER-AVDAIFQVVR-DLTIISEELR-	#
20140324-tam-191-2c	GTP-binding protein YchF [Aspergillus fumigatus Af293]	gi%7c70995164 gi%7c66849982 gi%7c159131104	43452	132	9	3	0.06	MPPKKAVVQEKVLLGRPGNNLKSGIVGLANVGKSTLFQAITKSSLGNPANFPYATIDPEEARVIVPDERFDWLCEHYKPKSQVPANLTVYDIAGLTRGASTGAGLGNAFLSHIRAVDAIFQVVRCFDDAEIIHVEGDVDPVRDLTIISEELRIKDIEFVEKALESLSKQTRRGGQSLEMKKLREEEATVAKVLQFLKDGNDVRKGDWTPKEVEVINPLFLLTAKPVVYLVNLSEKDYIRQKNKYLPKVFEWIQKNSPGDPLIPISVSFEERLAAFGDDARAAEECKALNTKSALPKVIVTMRQVLNLASFFTTGSDEVRQWTIRKGTKAPAAAGVIHTDFEKTFIQAIVYNYTTLREYGDEAAVKAAGKIMTKGKDYVVEDGDILLIKAGAAKG	3	VIVPDER-AVDAIFQVVR-DLTIISEELR-	#
20140324-tam-191-2c	hypothetical protein PNEG_01262 [Pneumocystis murina B123]	gi%7c470318915	23899	116	9	3	0.14	MAALVAEEPLQTQSILPKDIEDEIGQIKLFNKWNFEDVEIKDISLTDYIQVRQPQYLNHTAGRYQVKRFRKAQCPIIERLTNSLMMNGRNNGKKLMAMRIIKHAFEIIHILTDQNPIQVVVDAIVNCGVREDSTRIGSAGTVRRQAVDVSPLRRVNQAIALITIGAREAAFRSIKTIAECLAEELINAAKGSSNSYAIKKKDELERVAKSNR	3	DISLTDYIQVR-LTNSLMMNGR-QAVDVSPLR-	#
20140324-tam-191-2c	heat shock protein 70 [Aspergillus nidulans]	gi%7c2764949	66991	112	8	3	0.04	MSDEVYEGAIGIDLGTTYSCVANYEGTNVEIIANEQGSYTTPSFVSFTDKERLIGEAAKNQAAMNPQNTIFDIKRLIGRRYEDPIVKKDVESWPFKVVDQGGNPAVEVEYLGETKTFTPQEISSMVLMKMKEVAETKLGKKVEKAVITVPAYFNDNQRQATKDAGAIAGLNVLRIINEPTAAAIAYGLGSGKSEKERNVLIYDLGGGTFDVSLLNIQGGVFTVKATAGDTHLGGQDFDTNLLEHFKKEFQKKTGKDLSGDSRALRRLRTACERAKRTLSNATQTSVEIDSLFDGEDFNTSITRARFEDLNAKSFSGTLEPVQQVLKDSGLAKNQVDEIVLVGGSTRIPRIQKLLSDFFDGKKLEKSINPDEAVAYGAAVQAGILSGKATSAETQDLLLL…	2.66667	DAGAIAGLNVLR-GQTVPTIK-QQLESYISR-	#
20140324-tam-191-2c	hypothetical protein NEUTE1DRAFT_132552 [Neurospora tetrasperma FGSC 2508]	gi%7c336463434 gi%7c350297349	66853	112	8	3	0.04	MADEVYDGAIGIDLGTTYSCVAIYEGTNVEIIANEQGSFTTPSFVSFTPEERLIGEAAKNQAAMNPKNTVFDVKRLIGRRIDDPTVKKDQESWPFKVVDDGAGNPKVEVDYLNGVHTFSPQEISAMVLTKMKEIAEVKLGKKVEKAVITVPAYFNDNQRQATKDAGAIAGLNVLRIINEPTAAAIAYGLGANKSNKERNVLIYDLGGGTFDVSLLNIQGGVFTVKATAGDTHLGGQDFDTNLLDYCKKEFTRKTKKDLSGDARALRRLRTACERAKRTLSSGAQTTIEIDSLFDGEDFNINVTRARFEDLNAKAFSGTLEPVAQVLKDASIEKSAVDEIVLVGGSTRIPKVQKLLSEFFDGKKLEKSINPDEAVAYGAAVQAGILSGKATSAETSDLLL…	2.66667	DAGAIAGLNVLR-GQTVPTIK-QQLESYISR-	#
20140324-tam-191-2c	heat shock protein SSB [Marssonina brunnea f. sp. 'multigermtubi' MB_m1]	gi%7c406865167	66686	112	8	3	0.04	MADEVYDGAIGIDLGTTYSCVANYEGTNVEIIANEQGSFTTPSFVSFTDKERLIGESAKNNAAMNARNTIFDIKRLIGRRFDDPTVKKDIESWPFKVVDQEGSPMVEVEYLGENKIFSPQEISSMVLSKMKEVAEVKLGKKVSKAVITVPAYFNDNQRQATKDAGAIAGLNVLRIINEPTAAAIAYGLGAGKSNKERNVLIYDLGGGTFDVSLLNIQGGVFTVKATAGDTHLGGSDFDTALLDHFKKEFLRKTKKDLSSDPRALRRLRTACERAKRTLSNGAQTTVEIDSLFDGEDFNAQITRARFEDLNSKAFNGTLDPVATVLKDANLDKSKVDEIVLVGGSTRIPRIQKLLSDFFDGKKLEKSINPDEAVAYGAAVQAGILSGKATSADTADLLLL…	2.66667	DAGAIAGLNVLR-GQTVPTIK-QQLESYISR-	#
20140324-tam-191-2c	hypothetical protein PDE_00987 [Penicillium oxalicum 114-2]	gi%7c525579801	66834	112	8	3	0.04	MADLEVYDGAIGIDLGTTYSCVANYEGTNVEIIANDQGSYTTPSFVSFTDKERLIGEAAKNQAAMNPKNTIFDIKRLIGRPFDDPIVKKDVESWPFKVVAQGTAPAVEVEYLGEIKTFTPQEISSMVLMKMKEVAETKLGKKVEKAVITVPAYFNDNQRQATKDAGAIAGLNVLRIINEPTAAAIAYGLGSGKSDKERNVLIYDLGGGTFDVSLLNIQGGVFTVKATAGDTHLGGQDFDTNLLDHFKKEFNKKTGKDLSGDARALRRLRTACERAKRTLSNATQTTVEIDSLFDGEDFNSSITRARFEDLNAKAFSGTLEPVQQVLKDAGMEKSKVDEIVLVGGSTRIPRIQKLLSDFFDGKKLEKSINPDEAVAYGAAVQAGILSGKATSAETQDLLL…	2.66667	DAGAIAGLNVLR-GQTVPTIK-QQLESYISR-	#
20140324-tam-191-2c	hypothetical protein PTT_09152 [Pyrenophora teres f. teres 0-1]	gi%7c330918987 gi%7c311328404	99689	110	8	3	0.03	MSDEVYEGAIGIDLGTTYSCVANYEGTNVEIIANEQGSFTTPSFVSFTSDERLIGEAAKNQAAMNPENTVFDVKRLIGRRFEDETVTKDIKSWPFKVVDQNGSPLVEVEYLGEKKQFSPQEISAMVLVKMKEVAETKLGMKVEKAVITVPAYFNDNQRQATKDAGAIAGLNVLRIINEPTAAAIAYGLGSGKSDKERNVLIYDLGGGTFDVSLLHIQGGVFTVKATAGDTHLGGSDFDTALLDHFRKEFTKKYSKEHLMDSMLHDIAWNCLAHESYHNPSFDAAFPTRDAFVSAFDSLGFEFCPGLLDVVASDDPPTLDWFKSVGLDIFADKDQIPHKSWGIYMHFYVKPEREALTYVGSATAAAFGIRARLKDYRTLHAMSQTILDAIRNGYTLDHTV…	2.66667	DAGAIAGLNVLR-GQTVPTIK-QQLESYISR-	#
20140324-tam-191-2c	hypothetical protein COCHEDRAFT_1202027 [Bipolaris maydis C5]	gi%7c452001792	66847	110	8	3	0.04	MSEEVYEGAIGIDLGTTYSCVANYEGTNVEIIANEQGSFTTPSFVSFTSEERLIGEAAKNQAAMNPENTVFDVKRLIGRRFEDETVTKDIKSWPFKVVDQNGSPMVEVEYLGEKKQFSPQEISAMVLVKMKEVAETKLGKKVEKAVITVPAYFNDNQRQATKDAGAIAGLNVLRIINEPTAAAIAYGLGAGKSDKERNVLIYDLGGGTFDVSLLHIQGGVFTVKATAGDTHLGGQDFDTNLLDHFKKEFTKKTKKDISGDARALRRLRTACERAKRTLSNATQTTVEIDSLFDGEDFNANITRARFEDLNQKAFAGTLDPVAQVLKDANISKDKVDEIVLVGGSTRIPKIQKLLSDFFNGKKLEKSINPDEAVAYGAAVQAGILSGKATSADTADLLLL…	2.66667	DAGAIAGLNVLR-GQTVPTIK-QQLESYISR-	#
20140324-tam-191-2c	hypothetical protein GMDG_01542 [Pseudogymnoascus destructans 20631-21]	gi%7c440634765	42975	101	8	3	0.06	MSSPLGAIRIRKKKNVKKGIQFSIAVVGASGSGRTTFVNTLCGKKVLPGKDDDDAANAHIEEGVKIKPITVELELDEEGTRISLTVVDTPGFGDQIDNEASFGEIVGYLERQYDDILAEESRIKRNPRFRDNRVHALLYFITPTGHGLRELDIELMKRLSPRVNVIPVIGKADSLTPAELAESKKLVMEDIEHYRIPVYNFPYDIEEDDEDTVEENAELRGLMPFAIVGSEEVVEIGGRKVRARQYPWGVVEVDNPRHSDFLAIRSALLHSHLADLKEITHDFLYENYRTEKLSKSVDGGAGADSSMNPEDLASQSVRLKEEQLRREEEKLREIEIKVQREINEKRQELLARESQLKEIEARMHREQTAHLEATNGHAEE	2.66667	SSPLGAIR-VNVIPVIGK-HSDFLAIR-	#
20140324-tam-191-2c	60S ribosomal protein L9 [Talaromyces marneffei ATCC 18224]	gi%7c212543187 gi%7c210066655	21684	107	67	2	0.1	MRYLHSEETLPIPENVTINIRSRIVTVEGPRGKLTKDLSHISVSFGRPDKNTISIELHHGARKGIATLRTVRTLINNLIIGVTRGFLYKMRYVYAHFPINVNIEKNGETGNYEVEIRNFLGEKIVRRITAQAGVEVITSPNVKDELQLSGNSLEAVSQSAADIQQICRVRNKDIRKFLDGLYVSERTNIVVE	33.5	IVTVEGPR-TLINNLIIGVTR-	#
20140324-tam-191-2c	hypothetical protein PVAR5_5616 [Byssochlamys spectabilis No. 5]	gi%7c557724361	42930	121	42	2	0.07	MSLFAPAPEPKSLLGRHRPLAPSAAVKVSPLCLGAMNFGDAWKNFMGECDKKTSFEILDFFYENGGNFIDTANNYQNEESETWLGEWMEQRGVRDQIVLATKYTTGFRAYKGTQEIQSNFVGNNTKSMRVSVEASLKKLRTSYIDLLYVHWWDFSASIEEVMQSLNQLVQSGKVLYLGVSDTPAWIVSKANQYARDHGLRPFSVYQGRWSAAMRDFERDILPMVKAEGMGLAPWGALGGGNFKTAAQREELAKGTNPGRKWYPPSPTDIAVSDALEKVAKRHNTIITSVALAYVTHKAPHVVPIVGGRKVDHLKGNIEALSLQLSDEDLEEIENSYQFDIGFPMNFIFGSPDPKNNNPSNVRLMRSTGVYDFVEDAKPIRLAKK	21	GVRDQIVLATK-VLYLGVSDTPAWIVSK-	#
20140324-tam-191-2c	5-methyltetrahydropteroyltriglutamate--homocysteine methyltransferase [Aspergillus niger CBS 513.88]	gi%7c145256869 gi%7c134058452 gi%7c350632090	87012	106	36	2	0.02	MVQSSVLGFPRMGKLRDLKKATEAYWGDKISRDELLAEGKRLRLEHWKLQKDAGVDVIPSNDFAFYDQVLDHIQLFGVIPERYSKYNLHPLDEYFAMGRGLQKPAKDGQAAIDVPSLEMVKWFDSNYHYVKPTLQDNQTFKLAEQPKPVVQFLEAKEAGVVTRPVILGPVSFLTLAKADRGQSVDPITKIEELLPVYVELLQKLKEAGAEEVQIDEPVLVFDLPAKSKAAFKPAYEKLGALGAQAPRLVLATYFGDIVHNLDVFPALQSLHGIHIDLVRNPEQLDAVVAALGPQQILSAGVVDGRNIWKTNLKAAIEKVELAIQKLGKERVVVATSSSLLHVPHTLESEKTLDPEVRDWFSFAVQKLDEVVVIAKAVTEGPAAVREQLEVNAKSVQARA…	18	VQSSVLGFPR-VIQVDEPALR-	#
20140324-tam-191-2c	5-methyltetrahydropteroyltriglutamate--homocysteine methyltransferase [Aspergillus oryzae RIB40]	gi%7c169773743 gi%7c238491758 gi%7c83769201 gi%7c220697529 gi%7c391869189	87110	106	36	2	0.02	MVQSSVLGFPRMGKLRDLKKATEAYWGEKISRDDLLAEGKRLRLEHWKIQKNAGVDIIPSNDFAFYDQVLDHIQMFGVIPERYSKYNLHPVDEYFAMGRGLQKPAKDGQAAIDVPSLEMVKWFDSNYHYVKPTLQDNQTFKLAEQPKPVVQFLEAKEAGIVTRPVILGPVSFLTLAKADRGQTVDPITKINDLLPVYVELLQKLKEAGAEDVQIDEPVLVFDLPAKSKDAFKPAYEKLGALGDKAPRIVLATYFGDIVHNIDVLPALHNLYGIHIDLVRNPEQLDTVVGALGPNQVLSAGVVDGRNIWKTNFKAAIEKVELAIQKLGKDRVIVATSSSLLHVPHTLASEKNLDAEVRDWFSFAVEKTAEVVVIAKAVTEGPAAVREQLEANAKSVQSRA…	18	VQSSVLGFPR-VIQVDEPALR-	#
20140324-tam-191-2c	KLTH0C07018p [Lachancea thermotolerans]	gi%7c255712495 gi%7c238933909	86216	106	36	2	0.02	MVQSSVLGFPRIGANRELKKATEAYWQGKVSVEDLLKVGKDIRANNWKLQKEAGVDVIPSNDFSFYDQVLDLSLLFNVIPERYAKYNLSPLDTFFAMGRGLQRKATETEKAVDVTALEMVKWFDSNYHYVRPTFSHSTQFKLNGQKPVDEFLEAKALGIQTRPVLLGPVSYLFLGKADKDSLDLEPLSLLQKLVPLYAEILKKLAEAGATEVQIDEPILVLDLPQEVKAAFKTAYDFLASQSGLPAITFATYFGTVVPNLDAIKELPVAAFHFDFVRNPEQFDQVAAILKDNQSLSVGVVDGRNIWKNDFAKSSALVQKAIEKLGKDRVIVATSSSLLHTPVDLENEKKLNPEIKDWFSFATQKVKEVVVIAKNVSGEDVSAELKTNAKSVSNRASSNI…	18	VQSSVLGFPR-VIQVDEPALR-	#
20140324-tam-191-2c	cobalamin-independent methionine synthase [Aspergillus kawachii IFO 4308]	gi%7c358366034	87106	106	36	2	0.02	MVQSSVLGFPRMGKLRDLKKATEAYWGDKISRDELLAEGKRLRLEHWKLQKDAGVDVIPSNDFAFYDQVLDHIQLFGVIPERYSKYNLHPLDEYFAMGRGLQKPAKDGQAAIDVPSLEMVKWFDSNYHYVKPTLQDNQTFKLAEQPKPVVQFLEAKEAGVVTRPVILGPVSFLTLAKADRGQSVDPITKIEELLPVYVELLQKLKEAGAEEVQIDEPVLVFDLPAKSKAAFKPAYEKLGALGAQAPRLVLATYFGDIVHNLDVFPALQSLHGIHIDLVRNPEQLDAVVAALGPKQILSAGVVDGRNIWKTNFKAAIEKVELAIQKLGKERVVVATSSSLLHVPHTLESEKTLDPEVRDWFSFAVQKLDEVVVIAKAVTEGPAAVREQLEVNAKSVQARA…	18	VQSSVLGFPR-VIQVDEPALR-	#
20140324-tam-191-2c	Pc13g12930 [Penicillium chrysogenum Wisconsin 54-1255]	gi%7c255937361 gi%7c211584327	44405	90	27	2	0.05	MAADRLSSLLSHLKPGATNGLAAITQKNPDDVVITLAIRTPLTKARKGGFKDTELDYMIYALLKETLAKSQIDPALIEDVCLGNVNEVKAAYMVRAAALAAGIPHTAGASSVNRFCSSGLKAVQDIANQIQLGAIDVGVALGAELMSASGDRLDRPFNEEVLRNQEAADCMQPMGQTSENVGKDFDIPREQQDRYAAESFRRAEAAQNNGWLDDEIAPIAVKVKDPKTGEVKEVTLSRDDGIRPGTTFESLSKIRPAFPQFGDKSTGGNSSQVTDGAASVLLMRRSKAIELNQPILAKFCGATVAGVPPRVMGIGPTAAIPKLLSKFQLDKNDIDIYEINEAFASMAVYCVKNLGLDHAKVNPRGGAIALGHPLGATGARQIATILSEARRTKSKILVT…	13.5	VMGIGPTAAIPK-QIATILSEAR-	#
20140324-tam-191-2c	hypothetical protein AN1050.2 [Aspergillus nidulans FGSC A4]	gi%7c67517737 gi%7c40747012 gi%7c259488648	44152	90	27	2	0.05	MATERLNSILSHLRPGNKGVAAITQKNPDDVVITLSLRTPLTKARKGGFKDTELDYLVYALLKEVIAKSQIDPNLIEDVCLGNVNDGKAAYLVRAASLAAGIPHTAGASSVNRFCSSGLKAVQDIANQISLGAIDIGVAVGAEIMSAGGDRLNKPFNEEVLKNQEAADCMQPMGQTSENVGKDFNISRAQQDVYAAESFRRAEVAQKAGWFDDEIVPITTRVKDPKTGEERSVTLTKDDGVRYGTTVESLSKIRPAFPQFGDKSTGGNSSQVTDGAAAVLLMRRSKAIELGQPILAKFVGATVAGVPPRVMGIGPTAAIPKLLSKFNLDKNDVDIYEINEAFASMAVYCVEKLGLDHAKVNPRGGAIALGHPLGATGARQIATILSEARRTKAKVLVTS…	13.5	VMGIGPTAAIPK-QIATILSEAR-	#
20140324-tam-191-2c	RAS small monomeric GTPase RasA [Neosartorya fischeri NRRL 181]	gi%7c119479087 gi%7c119407726	23914	118	26	2	0.11	MASKFLREYKLVVVGGGGVGKSCLTIQLIQSHFVDEYDPTIEDSYRKQCLIDDEVALLDVLDTAGQEEYSAMREQYMRTGEGFLLVYSITSRQSFEEIMTFQQQILRVKDKDYFPIIVVGNKCDLEKERAVSQQEGEALARQFGCKFIETSAKSRINVENAFYDLVREIRRYNKEMSSYPSGSGAAGTRAPEGKMDVSEPGDNAGCCGKCIIM	13	AVSQQEGEALAR-INVENAFYDLVR-	#
20140324-tam-191-2c	RAS small monomeric GTPase RasA [Aspergillus fumigatus Af293]	gi%7c70997565 gi%7c825440 gi%7c37594596 gi%7c66851162 gi%7c159126742	23886	118	26	2	0.11	MASKFLREYKLVVVGGGGVGKSCLTIQLIQSHFVDEYDPTIEDSYRKQCVIDDEVALLDVLDTAGQEEYSAMREQYMRTGEGFLLVYSITSRQSFEEIMTFQQQILRVKDKDYFPIIVVGNKCDLEKERAVSQQEGEALARQFGCKFIETSAKSRINVENAFYDLVREIRRYNKEMSSYPSGSGAAGTRAPEGKMDVSEPGDNAGCCGKCVIM	13	AVSQQEGEALAR-INVENAFYDLVR-	#
20140324-tam-191-2c	40S ribosomal protein S1 [Aspergillus terreus NIH2624]	gi%7c115438592 gi%7c121733910 gi%7c114188921	29179	94	26	2	0.06	MAVGKNKRLSKGKKGIKKRTVDPFSRKDEYSVKAPSTFQIRDVGKTLVNRTSGLKNANDSLKGRIFEVSLADLQNDEDHAFRKVKLRVDEIQGKNCLTNFHGLDFTTDKLRSLVRKWQSLIEANVTVKTTDDYLLRLFAIAFTKRRPNQIKKTTYARSSQIRAIRKKMTEIMQREAASCSLAQLTTKLIPEVIGREIEKATQGIYPLQNVHIRKVKLLKSPKFDLGALLNLHGESTTDDKGHKVEREFKEQVLESV	13	TTDDYLLR-LFAIAFTK-	#
20140324-tam-191-2c	40S ribosomal protein S1 [Sclerotinia sclerotiorum 1980 UF-70]	gi%7c156064375 gi%7c269969610 gi%7c154691057	29241	94	26	2	0.06	MAVGKNKRLSKGKKGLKKKTLDPFTRKDWYQIKAPSSFQIRDVGKTLVNRTTGLKNANDSLKGRIIEVSLADLQKDEDHAFRKVKLRVDEVQGKNCLTNFHGLDFTSDKLRSLVRKWQSLIEANITVKTTDDYLLRLFAIAFTKRRPNQIKKTTYAASSQIRAIRKKMTEIIQREASTCTLTQLTAKLIPEVIGREIEKATQGIYPLQNVHIRKVKLLKAPKFDLGALLNLHGESNTDEQGQKVEREFKEKVLEQV	13	TTDDYLLR-LFAIAFTK-	#
20140324-tam-191-2c	40S ribosomal protein S1 [Talaromyces stipitatus ATCC 10500]	gi%7c242794679 gi%7c269969614 gi%7c218719012	29166	94	26	2	0.06	MAVGKNKRLSKGKKGLKKRTVDPFSRKDEYSVKAPSTFQIRDVGKTLVNRTTGLKNANDSLKGRIFEVSLADLQNDEDHAFRKVKLRVDEVQGKNCLTNFHGLDFTSDKLRSLVRKWQSLIEANVTVKTTDDYLLRLFAIAFTKRRPNQIKKTTYARSSQIRAIRKKMTEIIQREAASCTLSQLTTKLIPEVIGREIEKSTQGIYPLQNVHIRKVKLLKSPKFDLGALLNLHGESTTDDQGHKVEREFKETVLESV	13	TTDDYLLR-LFAIAFTK-	#
20140324-tam-191-2c	RecName: Full=40S ribosomal protein S1	gi%7c269969639	29042	94	26	2	0.06	MAVGKNKRLSKGKKGLKKRTQDPFSRKDEYSVKAPSTFAVRDVGKTLVNRTTGLKNANDSLKGRIFEVSLADLQNDEDHAFRKVKLRVDEVQGKNCLTNFHGLDFTSDKLRSLVRKWQTLIEANVTVKTTDDYLLRLFAIAFTKRRPNQIKKTTYARSSQIRAIRKKITEIIQREASTRTLAQLTKLIPEVIGREIDKSTHGIYPLQNVHIRKVKLLKSPKFDLGALLALHGESSTDDKGQKVEREFKEQVLESV	13	TTDDYLLR-LFAIAFTK-	#
20140324-tam-191-2c	40S ribosomal protein s3ae [Grosmannia clavigera kw1407]	gi%7c320588892	49339	94	26	2	0.03	MAVGKNKRLSKGKKGLKKKTVDPFTRKDWFSIKAPTTFAHRDVGKTLVNRTTGLKNANDALKGRVVEVSLADLQNDEEHSFRKIKLRVDEVQGKNCLTNFHGLDFTSDKLRSLVRKWQSLIEANVTVKTTDDYLLRLFAIAFTKRRPNQIKKTTYAASSQIRAIRRKMTEIIQREASSCTLQQLTAKLIPEVIGREIEKSTQGIYPLQNVHIRKVKLLKQPKFDLGALLALHGESGGGESGEKVDREFKEVVLEEILIIGPSNVGKSALLKRYCDDDFDPNDSAATIGIDFRAGQERFRTLSTSYYRGAHGIIFVYDLTSRPTFAQMDTWFAEAEANTIAAAGPNMPPCQYCLVAAKADRADTSRVVSTEEGLALARKYSPPTADEAEPLFFETSARTG…	13	TTDDYLLR-LFAIAFTK-	#
20140324-tam-191-2c	40S ribosomal protein S1 [Penicillium digitatum PHI26]	gi%7c425766701 gi%7c425781849	29207	94	26	2	0.06	MAVGKNKRLSKGKKGIKKRTVDPFTRKDEYSVKAPSTFQTRDVGKTLVNRTSGLKNANDSLKGRIFEVSLADLQNDEDHAFRKVKLRVDEIQGKNCLTNFHGLDFTTDKLRSLVRKWQSLIEANITVKTTDDYLLRLFAIAFTKRRPNQIKKTTYARSSQIRAIRKKMTEIIQREASTCTLSQLTHKLIPEVIGREIEKSTQGIYPLQNVHIRKVKLLKSPKFDLGALLALHGESATDDKGQKVEREFKETVLENV	13	TTDDYLLR-LFAIAFTK-	#
20140324-tam-191-2c	40S ribosomal protein S3aE [Sclerotinia borealis F-4157]	gi%7c563299367	29302	94	26	2	0.06	MAVGKNKRLSKGKKGLKKKTLDPFTRKDWFQIKAPSSFQVRDVGKTLVNRTTGIKNANDSLKGRIFEVSLADLQKDEDHAFRKVKLRVDEVQGKNCLTNFHGLDFTSDKLRSLVRKWQTLIEANVTVKTTDDYLLRLFAIAFTKRRPNQIKKTTYAASSQIRSIRKKMIEIIQREASTCTLTQLTAKLIPEVIGREIEKATQGIYPLQNVHIRKVKLLKAPKFDLGVLLNLHGESNTDEQGQKVEREFKEKVLEEV	13	TTDDYLLR-LFAIAFTK-	#
20140324-tam-191-2c	hypothetical protein AN8870.2 [Aspergillus nidulans FGSC A4]	gi%7c67903766 gi%7c74656798 gi%7c40740968 gi%7c259482908	29096	94	26	2	0.06	MAVGKNKRLSKGKKGIKKRTVDPFTRKDEYSVKAPSTFANRDVGKTLVNRTSGLKNANDSLKGRIFEVSLADLQGDEDHAFRKVKLRVDEIQGKNCLTNFHGLDFTTDKLRSLVRKWQSLIEANVTVKTTDDYLLRLFAIAFTKRRPNQIKKTTYARSSQIRAIRKKMTEIMQREASSCSLAQLTSKLIPEVIGREIEKATQGIYPLQHVHIRKVKLLKSPKFDLGALLNLHGESTTDDKGQKVEREFKEQVLESV	13	TTDDYLLR-LFAIAFTK-	#
20140324-tam-191-2c	1_3-beta-glucan synthase component GLS2 [Aspergillus terreus NIH2624]	gi%7c115389902 gi%7c114194852	217118	114	19	2	0.01	MSGYPQGHYDDGYGHQAAPHGDSYYQDDHGQAYYDNHDYGDGYYDRGGYYDGGAGAYHGGDAGYYDAGHHDEYYGDQYYDQGGAQGYGRRRRGDSEEDSETFSDFTMRSETARAADMDYYGRGDERYNSYADSQYGRGYGYRPPSSQISYGANRSSGASTPVYGMDYGNALPAGQRSREPYPAWPSDGQVPVSKEEIEDIFLDLVNKFGFQRDSMRNMYDHLLTQLDSRASRMTPNQALLSLHADYIGGDNANYRRWYFAAHLDLDDAVGFANMKLGKADRKTRKARKAAKKKAQENPENVEETLEALEGDNSLEAAEYRWKTRMNRMSQHDRVRQVALYLLCWGEANQVRFLPECLCFIFKCADDYYNSPECQNRVEPVEEFTYLNEVITPLYQFCRD…	9.5	IPFGVLYSR-FAGPSIYAGAR-	#
20140324-tam-191-2c	1_3-beta-glucan synthase catalytic subunit FksP [Neosartorya fischeri NRRL 181]	gi%7c119472600 gi%7c119406535	217986	114	19	2	0.01	MSGYQQGGGHYNDGYGHQEHGDSYYQDEHGQAYYDHDYGDGYYDRSGYYGADGNHNQHEGGYYDAGQPHDDYYGDQYYDQGNGQQGYDNRGRRRGDSEEDSETFSDFTMRSETARAADMDYYGRGDERYNSYADSQYGGRGYGYRPPSSQISYGANRSSGASTPVYGMDYGNALPAGQRSREPYPAWASDGQVPVSKEEIEDIFLDLVNKFGFQRDSMRNMYDHLMTMLDSRASRMTPNQALLSLHADYIGGDNANYRRWYFAAHLDLDDAVGFANMKLGKADRKTRKARKAAKKAAQQNPENVEETLEALEGDNSLEAAEYRWKTRMNKMSQHDRVRQLALFLLCWGEANQVRFLPECLCFIFKCADDYYNSPECQNRVEPVEEFTYLNEIITPLYQY…	9.5	IPFGVLYSR-FAGPSIYAGAR-	#
20140324-tam-191-2c	1_3-beta-glucan synthase component FKS1 [Aspergillus oryzae RIB40]	gi%7c169764403 gi%7c238504350 gi%7c83764527 gi%7c220690877 gi%7c391870043	217777	114	19	2	0.01	MSGYNQGGHYDDGYGQHGGHGDSYYQDEHHGQAYYDPNDYGDGYYDRGGYYPDGGHGYNQDGGYYDAGHQDDYYGEPYYDQGNGQQRGRRRGDSEEDSETFSDFTMRSETARAADMDYYGRGDERYNSYADSQYGGRGYGYRPPSSQVSYGGNRSSGASTPVYGMDYGNALPAGQRSREPYPAWSSDAQVPVSKEEIEDIFLDLVNKFGFQRDSMRNMYDHLLTQLDSRASRMTPNQALLSLHADYIGGDNANYRRWYFAAHLDLDDAVGFSNMKLGKADRKTRKARKAAQKKAKENPENVEETLEALEGDNSLEAAEYRWKTRMNRMSQHDRVRQVALYLLCWGEANQVRFLPECLCFIFKCADDYYSSPECQNRVEPVEEFTYLNEIITPLYQYCRE…	9.5	IPFGVLYSR-FAGPSIYAGAR-	#
20140324-tam-191-2c	fksp [Aspergillus fumigatus]	gi%7c2149093	217807	114	19	2	0.01	MSGYQQGGGHYNDGYGHQEHGDSFYQDEHGQAYYDHDYGDGYYDRSGYYGPDGNHNQQEGGYYDAGQPHDDYYGDHYYDQGNGQQGYDNRGRRRGDSEEDSETFSDFTMRSETARAADMDYYGRGDERYNSYADSQYGGRGYGYRPPSSQISYGANRSSGASTPVYGMDYGNALPAGQRSREPYPAWASDGQVPVSKEEIEDIFLDLVNKFGFQRDSMRNMYDHLMTMLDSRASRMTPNQALLSLHADYIGGDNANYRRWYFAAHLDLDDAVGFANMKLGKADRKTRKARKAAKKAAQQNPENVEETLEALEGDNSLEAAEYRWKTRMNKMSQHDRVRQLALFLLCWGEANQVRFLPECLCFIFKCADDYYNSPECQNRVEPVEEFTYLNEIITPLYQY…	9.5	IPFGVLYSR-FAGPSIYAGAR-	#
20140324-tam-191-2c	1_3-beta-D-glucan synthase catalytic subunit [Aspergillus lentulus]	gi%7c295834061	217957	114	19	2	0.01	MSGYQQGGGHYNDGYGHQEHGDSYYQDEHGQAYYDHDYGDGYYDRSGYYGADGNHNQHEGGYYDAGQPHDDYYGDQYYDQGNGQQGYDNRGRRRGDSEEDSETFSDFTMRSETARAADMDYYGRGDERYNSYADSQYGGRGYGYRPPSSQISYGANRSSGASTPVYGMDYGNALPAGQRSREPYPAWASDGQVPVSKEEIEDIFLDLVNKFGFQRDSMRNMYDHLMTMLDSRASRMTPNQALLSLHADYIGGDNANYRRWYFAAHLDLDDAVGFANMKLGKADRKTRKARKAAKKAAQQNPENVEETLEALEGDNSLEAAEYRWKTRMNKMSQHDRVRQLALFLLCWGEANQVRFLPECLCFIFKCADDYYNSPECQNRVEPVEEFTYLNEIITPLYQY…	9.5	IPFGVLYSR-FAGPSIYAGAR-	#
20140324-tam-191-2c	1_3-beta-glucan synthase component GLS2 [Aspergillus kawachii IFO 4308]	gi%7c358371376	216705	114	19	2	0.01	MSGYPAGHYEDGYGHQEHGDAYYQDEHGQAYYDPNDYGDSYYDRGNYYNAEGGQAYGQEGGYYDAGHQDDYYGDQYYDQGNGAPRGRRRGDSEEDSETFSDFTMRSETARAADMDYYGRGDERYNSYADSQYAGRGYNGYRPPSSQVSYGANRSSGASTPVYGMDYGNALPGGPRSREPYPAWASDGQVPVSKEEIEDIFIDLVNKFGFQRDSMRNMYDHLMTQLDSRASRMTPNQALLSLHADYIGGDNANYRRWYFAAHLDLDDAVGFANMKLGKADRKTRKARKAAKAAAQQNPENVEENLEAMEGDNSLEAAVYRWKTRMNRMSPHDRVRQLALYMLCWGEANQVRYMPECICFIFKCADDYYSSPECQSRVEPVEEFTYLNEIITPLYQFCRDQ…	9.5	IPFGVLYSR-FAGPSIYAGAR-	#
20140324-tam-191-2c	unnamed protein product [Aspergillus niger]	gi%7c134058231	235578	95	19	2	0	MAPSILSPVPSSFASPLSPKMPRRISGFAESDTMSNNGMSRSITSRRVSSRRLDPQETEFSRKLSILQRQTGDELGLTISGDSYEMVLSWIQDERMTLVPPDGSDYDKVLGWAQLFVTRLRSFEEAIEGFTNVSGLAFQMAYGYCLLLLKLGDENASALMTSFGFFYSNSTALGNLLERTALFSVSSDIRRQLVQALEDLVHLVASVAMHFHKAVLRLGDESEYINIYEAFPEQIHRFRRACEEISESMWQHQLLKERGDETKGKLPYLSLKPSHKLTSSEPPVADVRAVRSWLTPEDRVLSNVAETVSHLAHDREENTCRWVKQALFDFVTSENKVMSIVGKPGSGKTVLASVIVDNLQHAIRGVPYKTLFVPINARLPAGTRPRAIVKAILSQLFEK…	9.5	IYVEIWQR-ATELTQEIYR-	#
20140324-tam-191-2c	NACHT domain protein [Aspergillus kawachii IFO 4308]	gi%7c358374260	235568	95	19	2	0	MAPSILSPVPSSFASPLSPKMPRRISGFAESDTMSNNGMSRSITSRRVSSRRLDPQETEFSRKLSILQRQTGDELGLTISGDSYEMVLSWIQDERMTLVPPDGSDYDKVLGWAQLFVTRLRSFEEAIEGFTNVSGLAFQMAYGYCLLLLKLGDENASALMTSFGFFYSNSTALGNLLERTGLFSVSSDIRRQLVQALEDLVHLVASVAMHFHKAVLRLGDESEYINIYEAFPEQIHKFRRACEEISESMWKHQLVKERGDETKGKLSSLFLISKHKLTLSEPPVVDVRAVRSWLNPEDRVLSNVAETVSHLAHDREENTCRWVKQALFDFVTSENKVLSIVGKPGSGKTVLASVLVDNLQHPIRGVPYKTLFVPINARLPAGTRPRAIVKAILSQLFEK…	9.5	IYVEIWQR-ATELTQEIYR-	#
20140324-tam-191-2c	hypothetical protein PDE_07694 [Penicillium oxalicum 114-2]	gi%7c525586484	114565	108	15	2	0.03	MTDATMEVENPQQTMEMIKQGEIDESLYSRQLYVLGHEAMKRMGSSNVLVVGLKGLGVEIAKNIALAGVKSLTLYDPAPVAIADLSSQFFLQPQDVGKPRAEVTAPRVAELNSYVPVKIHEGTNLVGDLEQLKRYQAVVLTQTPLKEQLAIADFCHQHGIYVTITDTFGLFGYIFNDFGKKFTVGDPTGEEPVSGIVAGIAEDGLVSALDETRHGLEDGDFVTFTEVKGMDGLNNSAPRKVTVKGPYTFSIGDVSGLGSYQGGGLFTQVKMPKFVDFQPLSEQIKKPEILVSDFAKFDRPAQLHVGIQALHKFAENHDGQFPRPHNDSDAKEVMKLANDIVAAGDEKIELDEKIITELSYQARGDLNPLAAFFGGIAAQEVLKAVSGKFMPVHQWMYFD…	7.5	MGSSNVLVVGLK-GDLNPLAAFFGGIAAQEVLK-	#
20140324-tam-191-2c	40S ribosomal protein S7 [Neosartorya fischeri NRRL 181]	gi%7c119491783 gi%7c119411546	22800	83	15	2	0.08	MAAINKIAHNSPSRQNPSELETAIAGALFDLESNTQDLKATLRPLQFVSAREVEVGHGKKAVIIFVPVPLLQGFHKIQQRLTRELEKKFSDRHVLFVAQRRILPRPKRSVNSRTNQKQKRPRSRTLTAVHDAILNDLVYPVEIVGKRIRTKEDGSKTLKVVLDEKERGGVDHRLDAYGEVYRRLTGRSVVFEFPQSGAAEY	7.5	HVLFVAQR-LDAYGEVYR-	#
20140324-tam-191-2c	Pc18g00610 [Penicillium chrysogenum Wisconsin 54-1255]	gi%7c255942279 gi%7c211586641	22582	83	15	2	0.08	MAAINKIAPNSPSRQNPSELETAIAGALFDLESNTQDLKASLRPLQFVSAREVEVGHGKKAIIVFVPVPLLANFHKIQQRLTRELEKKFSDRHVLFVAQRRILPRPKRSVNSRTTQTQKRPRSRTLTAVHDSILSDLVYPVEIVGKRTRTKEDGSKTLKVILDEKERGGVDHRLDAYGEVYRRLTGRSVAFEFPQSGAEF	7.5	HVLFVAQR-LDAYGEVYR-	#
20140324-tam-191-2c	40S ribosomal protein S7e [Penicillium digitatum Pd1]	gi%7c425768729 gi%7c425770219	28110	83	15	2	0.06	MSPKTATLSSNRKSRTLSECADPTGNSHSIQSANLPSVDITTSTSRSTPSLAIMAAINKIAPNSPSRQNPSELETAIAGALFDLESNTQDLKASLRPLQFVSAREVEVGHGKKAIIVFVPVPLLNNFHKIQQRLTRELEKKFSDRHVLFVAQRRILPRPKRSVNSRTTQTQKRPRSRTLTAVHDSILSDLVYPVEIVGKRTRTKEDGSKTLKVILDEKERGGVDHRLDAYGEVYRRLTGRSVAFEFPQSGAEF	7.5	HVLFVAQR-LDAYGEVYR-	#
20140324-tam-191-2c	RS7_NEUCR 40S ribosomal protein S7 [Aspergillus nidulans FGSC A4]	gi%7c67537492 gi%7c40741804 gi%7c259482216	22755	83	15	2	0.08	MAAINKIAHNSPSRQNPSELETAIAGALFDLESNTQDLKATLRPLQFVSAREVEVGHGKKAVIIFVPVPLLQAFHKIQQRLTRELEKKFSDRHVLFVAQRRILPKPKRSVNSRTNQKQKRPRSRTLTAVHDAILDDLVYPVEIVGKRIRTKEDGSKTLKVILDEKERGGVDHRLDAYGEVYRRLTGRAVVFEFPQGGASEF	7.5	HVLFVAQR-LDAYGEVYR-	#
20140324-tam-191-2c	40S ribosomal protein S7e [Aspergillus fumigatus Af293]	gi%7c70999658 gi%7c66852183 gi%7c159127559	22830	83	15	2	0.08	MAAINKIAHNSPSRQNPSELETAIAGALYDLESNTQDLKATLRPLQFVSAREVEVGHGKKAVIIFVPVPLLQGFHKIQQRLTRELEKKFSDRHVLFVAQRRILPRPKRSVNSRTNQKQKRPRSRTLTAVHDAILNDLVYPVEIVGKRIRTKEDGSKTLKVILDEKERGGVDHRLDAYGEVYRRLTGRSVVFEFPQSGAAEY	7.5	HVLFVAQR-LDAYGEVYR-	#
20140324-tam-191-2c	Pc22g03660 [Penicillium chrysogenum Wisconsin 54-1255]	gi%7c255947280 gi%7c211591424	59875	137	13	2	0.05	MGLHEDEDRQYAAEVQAVQSWWKDSRWRYTKRPFTAEQIVAKRGNLKIDYPSNVQAKKLWGIVESNFQNKQASFTYGCLEPTMITQMCKFLDTIYVSGWQSSSTASSTDEPSPDLADYPMDTVPRKVNQLFMAQLFHDRKQREERVTTPAGQRGNVANVDYLRPIIADADTGHGGLTAVMKLTKLFVERGAAGIHIEDQAPGTKKCGHMAGKVLVPISEHINRLVAIRAQADIMGSDLLAIARTDSEAATLITSTIDHRDHAFIVGSTNSSLQPLNDLMVAAEQAGKNGAQLQEIEDQWISQAGLKLFSEAVIDTINSGSHANKKSLIDQYLSASKGKSNTESRAIAKNLTGVDIYWNWDSPRTREGYYRYKGGTQCAVNRAIAYAPFADLIWMESKLP…	6.5	AQADIMGSDLLAIAR-MVSGGVSSTAAMGK-	#
20140324-tam-191-2c	Isocitrate lyase/phosphorylmutase [Macrophomina phaseolina MS6]	gi%7c407918965	60905	137	13	2	0.05	MATGTMLPQMPSIDAEEQAFQAEVKAIQQWWTDSRWRYTKRPFTAEQIATKRGNLKIQYPGNEQSKKLWRTVEGRFKNKDASFTYGCLDPVMVTQMAKYIDTVYVSGWQCSSTASSSDEPGPDLADYPMTTVPNKVQHLWFAQLFHDRKQREERLTAPKEKRSQLPNIDYLRPIIADADTGHGGLTAIMKLTKMFVEKGAAGIHIEDQAPGTKKCGHMAGKVLVPISEHINRLVAIRAQADIMGSDLLAIARTDSEAATLITSTIDPRDHAFILGSTNPALQPLGDLMRAAEEAGKTGDELQAIEDQWTAQAGLKLFHEAVADTINAGVHVNKRELIEQFTQQAKGKSNLEARAIAKGITGVDIFFDWDAARTREGYYRYQGGTQCAINRAVAYAPFAD…	6.5	AQADIMGSDLLAIAR-MVSGGVSSTAAMGK-	#
20140324-tam-191-2c	Isocitrate lyase [Penicillium digitatum PHI26]	gi%7c425768753 gi%7c425776113	59977	137	13	2	0.05	MGLHEDEDRQFAEEVQAVQNWWKDSRWRYTKRPFTAEQIVAKRGNLKIEYPSNVQAKKLWGIIESNFQNKQASYTYGCLEPTMITQMCKFLDTIYVSGWQSSSTASSTDEPSPDLADYPMDTVPRKVNQLFMAQLFHDRKQREERVTTPAGQRENVANVDYLRPIIADADTGHGGLTAVMKLTKLFVERGAAGIHIEDQAPGTKKCGHMAGKVLVPISEHINRLVAIRAQADIMGSDLLAIARTDSEAATLITSTIDHRDHAFIVGSTNPSIQPLNDLMVAAEQAGKNGAQLQAIEDQWTTEAGLKLFNEAVIDTINAGSNANKKNLIDQYLAASKGKSNTESRAIAKNLTGVDIIWNWESPRTREGFYRYQGGTQCAVNRAIAYAPFADLIWMESKLP…	6.5	AQADIMGSDLLAIAR-MVSGGVSSTAAMGK-	#
20140324-tam-191-2c	hypothetical protein PDE_08297 [Penicillium oxalicum 114-2]	gi%7c525587085	60203	137	13	2	0.05	MGLHEDEDRKFAEEVEAVKNWWKDSRWRFTKRPFTAEQIVAKRGNLTIDYPSIVQAKKLWGILEQNWQNKEASYTYGCLEPTMITQMCKFLDTIYVSGWQSSSTASSTDEPSPDLADYPMDTVPRKVNQLFMAQLFHDRKQREERITTPKEQRSKVANVDYLRPIIADADTGHGGLTAVMKLTKLFVERGAAGIHIEDQAPGTKKCGHMAGKVLVPISEHINRLVAIRAQADIMGSDLLAIARTDSEAATLITSTIDHRDHAFIVGSTNPSLQALNDLMVAAEQAGKNGPELQAIEDQWTAQAGLKLFDDAVEDAINAGTHSNKKSLIEQYRKAAKGKSNNEARAIAKNLTGVDIYWNWDAPRTREGFYRYQGGTQCAVNRAVAYAPFADLIWMESKLP…	6.5	AQADIMGSDLLAIAR-MVSGGVSSTAAMGK-	#
20140324-tam-191-2c	60S ribosomal protein L3 [Chaetomium globosum CBS 148.51]	gi%7c116204627 gi%7c88176325	44078	91	13	2	0.04	MSHRKYEAPRHGSLAYLPRKRAARHRGKVKSFPKDDAKKPVHLTAAMGYKAGMTTIVRDLDRPGAKAHKKEVVEAVTIIDTPPMMVVGLVGYIETPRGLRSLTTVWAEHLSDEVKRRFYKNWYKSKKKAFTKYAKKHSENSGASITRELERIKKYCTVVRVLAHTQIRKTPLKQKKAHLMEIQINGGSVADKVEFGHGLFEKPVSVDSIFEKDEMIDVIAVTKGHGFSGVTARWGTKKLPRKTHKGLRKVACIGAWHPSHVQWTVARAGQMGYHHRTSVNHKVYRIGKGDADDSAATEIDVTKKKITPMGGFVRYGEVNNDFVMVKGSVPGVKKRVMTLRKSMFTHTSRRALEKVELKWIDTSSEFGHGAFQTPAEKKQYQGTLKKDLAVAA	6.5	HGSLAYLPR-VLAHTQIR-	#
20140324-tam-191-2c	60S ribosomal protein L3 [Botryotinia fuckeliana B05.10]	gi%7c154301761 gi%7c347828492 gi%7c472240301	44224	91	13	2	0.04	MSHRKFEAPRHGSLAYLPRKRASRHRGKVKSFPKDDKTKPVHLTATLGYKAGMTTIVRDLDRPGAKTHKKEVVEAVTVIETPPVIVVGLVGYIETPRGLRSLTTVWAEHLSDEVKRRFYKNWYKSKKKAFTKYAKKHSENSGSSITRELERIKKYCTVVRVLAHTQIRKTPLKQKKAHLMEIQVNGGSVAEKVDFASGLFEKPVEISSIFEQDEMIDVIAVTKGHGFSGVTSRWGTKKLPRKTHKGLRKVACIGAWHPAHVQWTVARAGQDGYHHRTSCNHKVYRIGRGDDPNNAATEFDVSKKAITPMGGFVRYGEVKNDFIMLKGSVPGVKKRVMTLRKSMFVHTSRKALEKVELKWIDTSSKFGHGAYQTAEEKHQFLGTLKKDIAQSS	6.5	HGSLAYLPR-VLAHTQIR-	#
20140324-tam-191-2c	60S ribosomal protein L3 [Neurospora crassa OR74A]	gi%7c164424622 gi%7c30580497 gi%7c28881190 gi%7c157070591 gi%7c336468587 gi%7c350289142	44008	91	13	2	0.04	MSHRKYEAPRHGSLAYLPRKRAARHRGKVKSFPKDDAKKPVHLTAAMGYKAGMTTIVRDLDRPGAKAHKKEVVEAVTIIDTPPMIVVGLVGYIETPRGLRSLTTVWAEHLSDEVKRRFYKNWYKSKKKAFTKYVKKHSDNNGAAITRELERIKKYCTVVRVLAHTQIRKTPLKQKKAHLMEIQINGGSVADKVEFGHGLFEKPVSIDSIFEKDEVIDVIAVTKGHGFTGVTARWGTKKLPRKTHKGLRKVACIGAWHPSHVQWTVARAGQAGYHHRTSVNHKIYRIGKGDAEDSAATEVDVTKKKITPMGGFVRYGEINNDFVMVKGSVPGVKKRVMTLRKSMFVHTSRKALEKVELKWIDTSSEFGHGAFQTPAEKKQFQGTLKKDLAASS	6.5	HGSLAYLPR-VLAHTQIR-	#
20140324-tam-191-2c	hypothetical protein [Podospora anserina S mat+]	gi%7c171689180 gi%7c170944552	44115	91	13	2	0.04	MSHRKYEAPRHGSLAYLPRKRAARHRGKVKSFPKDDAKKPVHLTAAMGYKAGMTTIVRDMDRPGAKANKKEVVEAVTIIDTPPMIVVGLVGYIETPRGLRSLTTVWAEHLSDEVKRRFYKNWYKSKKKAFTKYAKKHSENSGASITRELERIKKYCTVVRVLAHTQIRKTPLKQKKAHLMEIQINGGSVADKVEFGHGLFEKPVSIDTIFEKDEMIDVIAVTKGHGFSGVTARWGTKKLPRKTHKGLRKVACIGAWHPSHVQWTVARAGQMGYHHRTSVNHKVYRIGKGDADDNAATEIDVTKKTITPMGGFVRYGEIKNDFVMVKGSVPGTKKRIMTLRKSMFIHTSRKALEKVELKWIDTSSEFGHGAFQTPAEKKQYQGTLKKDLAASS	6.5	HGSLAYLPR-VLAHTQIR-	#
20140324-tam-191-2c	60S ribosomal protein L3 [Talaromyces stipitatus ATCC 10500]	gi%7c242810586 gi%7c218716236	44828	91	13	2	0.04	MGEVPPVSHRKYEAPRHGSLAYLPRKRAARHRGKVKSFPKDDPKKPVHLTASMGYKAGMTTIVRDLDRPGAKMHKKEVVEAVTVIETPPLVAVGVVGYIETPRGLRSLTTVWAEHLSDELKRRFYKNWYKSKKKAFTRYAKKHTESSAASVTRELERIKKYCTVVRVLAHTQIRKTPLKQKKAHLMEIQVNGGSVADKVDFAHGLFEKTIDIDTIFEQNEVIDVIAVTKGHGFNGVTSRWGTKKLPRKTHKGLRKVACIGAWHPNHVQWTVARAGQMGYHHRTSVNHKIYRIGKGSDEGNASTEYDVSKKTITPLGGFVRYGEVKNDFVIVKGSVPGVKKRVMTLRKTLYPQVSRKATEKIDLKWIDTSSEFGHGAYQTPAEKRAFMGTLKKDLVTTV	6.5	HGSLAYLPR-VLAHTQIR-	#
20140324-tam-191-2c	60S ribosomal protein L3 [Verticillium alfalfae VaMs.102]	gi%7c302412909 gi%7c261356863	44015	91	13	2	0.04	MSHRKYEAPRHGSLAYLPRKRAARHRGKVKSFPKDDPKKPVHLTATMGYKAGMTTIVRDLDRPGAKAHKKEVVEAVSIIDTPPMVVVGLVGYIETPRGLRSLATVWAEHLSDEVRRRFYRNWYKSKKKAFTKYAKKHSESSGASITREIERIKKYCSVVRVLAHTQIRKTPLKQKKAHLMEIQVNGGSVADKVDFGYGLFEKEVSVDSIFEQDEMIDVIAVTKGKGFNGVTSRWGTKKLPRKTHKGLRKVACIGAWHPSHVQWTVARAGQMGYHHRTSVNHKVYRIAKAGAEDSASTELDVTKKVITPLGGFVRYGEINNDFVMVKGSIPGPKKRVVTLRKSMFVHTSRRSNEKITLKWIDTSSEFGHGAFQTPAEKKQYQGTLKKDLVAA	6.5	HGSLAYLPR-VLAHTQIR-	#
20140324-tam-191-2c	60S ribosomal protein L3 [Aspergillus nidulans]	gi%7c6537320 gi%7c259479602	44381	91	13	2	0.04	MSHRKYEAPRHGSLAYLPRKRAARHRGRVKSFPKDDPKKPVHLTASMGYKAGMTTVVRDLDRPGAKMHKKEIVEAATVIETPPLIAVGVVGYIETPRGLRSLATVWAEHLSDEVKRRFYKNWYKSKKKAFTKYAKKHSEENGASITRDLERIKKYCTVVRVLAHTQIRKTPLKQKKAHLMEIQVNGGSVAEKVDFARNLFEKPIEIDTIFEKDEMIDVIAVTKGHGFQGVTSRWGTKKLPRKTHKGLRKVACIGAWHPSHVQWTVARAGQMGYHHRTSCNHKVFRIGKGSDEANASTDFDVSKKQITPLGGFVRYGEVKNDFILLKGSVPGVKKRVMTLRKTLYPQTSRRATEKVDLKWIDTSSKFGHGAFQTPEEKRAFMGTLKKDLVTSA	6.5	HGSLAYLPR-VLAHTQIR-	#
20140324-tam-191-2c	Psi-producing oxygenase C [Penicillium digitatum Pd1]	gi%7c425768459	126034	89	12	2	0.01	MLRRISTQFKRSKDLKDSKDFKDSNGENTENSTEKNSKRASKVSPTRKSFSAKEEHHVVKRAEVVAVFEKFAQAIHASKEPLPNQTSDGAYLKHDKSSGLINDIKSLGFRELNTVKDLIASKASGELVDDKTYLMERIIQMVADLPGNSKNRTELTSLFLDELWNSIPHPPLSYMGDEYKYRSADGSNNNPTLPWLGAANTAYCRTIPPLTIQPSGLPDAGLIFDTLFARQEFTPHPNKVSSVFFDWASLIIHDIFQTDYRQQHLNKTSAYLDLSILYGDVQEQQDLIRSHQDGKLKPDCFSEGRLQALPAACGVLLVMLNRFHNHVVTQLAEINENGRFSKPRPGLSEEDAKKVWTKRDEDLFQTGRLITCGLYINITLYDYLRTIVNLNRTNSTWCL…	6	AVLSDAVALVR-IALVAMLR-	#
20140324-tam-191-2c	hypothetical protein PDE_03690 [Penicillium oxalicum 114-2]	gi%7c525582494	69442	94	10	2	0.03	MADGLQMGNLSLQDSQHAPQGGPPGRAAYIPPHLRGRNAGASVGGPAPPPGPAAGFSGPRDARGGNWANANAPNFSPRGPANGHGGSYGGGGNFASGGGGGAARGSGDGQWRDGKHIPGPANPRLERELFGLGQDDPSKQHTGINFANYDDIPVEASGQDVPEPVNAFTNPPLDDHLISNIKLASYVTPTPVQKYSIPIVMGGRDLMACAQTGSGKTGGFLFPILSQAFQTGPSAAPQQAGGGQFYGRQRKAYPTSLILAPTRELVSQIFDEARKFAYRSWVRPCVVYGGADIGSQLRQIERGCDLLVATPGRLVDLIERGRISLVNIKYLVLDEADRMLDMGFEPQIRRIVEGEDMPRVEDRQTLMFSATFPRDIQMLARDFLKDYIFLSVGRVGSTS…	5	ELVSQIFDEAR-IVEGEDMPR-	#
20140324-tam-191-2c	histone H2B [Aspergillus clavatus NRRL 1]	gi%7c121704592 gi%7c156630820 gi%7c119398705	14932	118	9	2	0.18	MPPKAAEKKPSTGGKAPAGKAPAEKKEAGKKTAAAASGDKKKRGKTRKETYSSYIYKVLKQVHPDTGISTRAMSILNSFVNDIFERVATEASKLAAYNKKSTISSREIQTSVRLILPGELAKHAVSEGTKAVTKYSSSAK	4.5	QVHPDTGISTR-AMSILNSFVNDIFER-	#
20140324-tam-191-2c	histone H2B [Talaromyces marneffei ATCC 18224]	gi%7c212545088 gi%7c210065667	15006	118	9	2	0.18	MPPKAAEKKPSTGGKAPAGKAPAEKKEAGKKTATAATGEKKKRGKTRKETYSSYIYKVLKQVHPDTGISTRAMSILNSFVNDIFERVATEASKLASYNKKSTISSREIQTSVRLILPGELAKHAVSEGTKAVTKYSSSAK	4.5	QVHPDTGISTR-AMSILNSFVNDIFER-	#
20140324-tam-191-2c	Pc20g08600 [Penicillium chrysogenum Wisconsin 54-1255]	gi%7c255945231 gi%7c211588118	15075	118	9	2	0.18	MPPKAAEKKPSTGGKAPVGGKAPAEKKEAGKKTATAATGEKKKRGKTRKETYSSYIYKVLKQVHPDTGISTRAMSILNSFVNDIFERVATEASKLAAYNKKSTISSREIQTSVRLILPGELAKHAVSEGTKAVTKYSSSAK	4.5	QVHPDTGISTR-AMSILNSFVNDIFER-	#
20140324-tam-191-2c	histone H2B [Byssochlamys spectabilis No. 5]	gi%7c557721285	15033	118	9	2	0.18	MPPKAAEKKPSTGGKAPAAGKAPAEKKEAGKKTATAASGDKKKRGKTRKETYSSYIYKVLKQVHPDTGISTRAMSILNSFVNDIFERVATEASKLAAYNKKSTISSREIQTSVRLILPGELAKHAVSEGTKAVTKYSSSAK	4.5	QVHPDTGISTR-AMSILNSFVNDIFER-	#
20140324-tam-191-2c	H2B_EMENI Histone H2B [Aspergillus nidulans FGSC A4]	gi%7c67526023 gi%7c122046 gi%7c296335 gi%7c40743823 gi%7c259485538 gi%7c227595	14946	118	9	2	0.18	MPPKAAEKKPSTGGKAPAGKAPAEKKEAGKKTAAAASGEKKKRGKTRKETYSSYIYKVLKQVHPDTGISTRAMSILNSFVNDIFERVATEASKLAAYNKKSTISSREIQTSVRLILPGELAKHAVSEGTKAVTKYSSSAK	4.5	QVHPDTGISTR-AMSILNSFVNDIFER-	#
20140324-tam-191-2c	histone H2B [Aspergillus fumigatus Af293]	gi%7c71000769 gi%7c119493440 gi%7c74673812 gi%7c156630823 gi%7c66852703 gi%7c119412070 gi%7c159128080	14946	118	9	2	0.18	MPPKAAEKKPSTGGKAPAGKAPAEKKEAGKKTAAAATGDKKKRGKTRKETYSSYIYKVLKQVHPDTGISTRAMSILNSFVNDIFERVATEASKLAAYNKKSTISSREIQTSVRLILPGELAKHAVSEGTKAVTKYSSSAK	4.5	QVHPDTGISTR-AMSILNSFVNDIFER-	#
20140324-tam-191-2c	unnamed protein product [Aspergillus oryzae RIB40]	gi%7c83773129 gi%7c391868690	17078	118	9	2	0.16	MAPKAAEKKPSTGGKAPAGGKAPAEKKEAGKKTAAAASGDKKKRGKTRKETYSSYIYKGVWQRYPSSESRKLTINLVLKQVHPDTGISTRAMSILNSFVNDIFERVATEASKLAAYNKKSTISSREIQTSVRLILPGELAKHAVSEGTKAVTKYSSSAK	4.5	QVHPDTGISTR-AMSILNSFVNDIFER-	#
20140324-tam-191-2c	Pc12g16020 [Penicillium chrysogenum Wisconsin 54-1255]	gi%7c255934442 gi%7c211583019	51862	114	5	2	0.04	MSYALSESHRDQMHNSLVSSDPEVASIMEKEIQRQRESVVLIASENFTSRAVFDALGSPMCNKYSEGYPGARYYGGNQHIDAIEITCQQRALKAFNLDPAKWGVNVQCLSGSPANLQVYQALMRPHDRLMGLDLPHGGHLSHGYQTPSKKISAVSTYFETFPYRVDLETGIIDYDTLERNAEMYRPKCLVAGTSAYCRLIDYKRMREIADKVGAYLIVDMAHISGLIAAGVIPSPFEYADVVTTTTHKSLRGPRGAMIFFRKGVRSTDKNGKEVLYDLENPINFSVFPGHQGGPHNHTITALAVALKQVDTPEFKQYQEQVIKNAKALEEEFKALGHKLVSDGTDSHMVLVDLRAKSLDGARVEAVLEQINIACNKNSIPGDKSALTPCGIRIGAPAMS…	2.5	VDLETGIIDYDTLER-GAMIFFR-	#
20140324-tam-191-2c	succinate dehydrogenase [ubiquinone] flavoprotein subunit_ mitochondrial precursor [Coccidioides immitis RS]	gi%7c119195929 gi%7c392862228	71109	103	5	2	0.03	MSFNGLRSLAPATRFSRSLRDQRRLFSSSRPAARIITSQPLRAKEASPFLTKKYPVIDHEYDAVVVGAGGAGLRAAFGLAEAGFNTACVTKLFPTRSHTVAAQGGINAALGNMHEDDWRWHMYDTVKGSDWLGDQDAIHYMTREAPQSVIELEGYGCPFSRTEDGKIYQRAFGGQSKEFGKGGQAYRCCAAADRTGHALLHTLYGQSLRYNASYFIEYFALDLLMENGECKGILAYNQEDGTLHRFKAHHTVLATGGYGRAYFSCTSAHTCTGDGMAMVARAGLPNQDLEFVQFHPTGIYGAGCLITEGARGEGGYLLNSNGERFMERYASTAKDLASRDVVSRSMTLEIREGRGVGPEKDHIYLQLSHLPPEILHERLPGISETASIFAGVDVTKQPI…	2.5	SMTLEIR-LGANSLLDLIVFGR-	#
20140324-tam-191-2c	succinate dehydrogenase flavoprotein subunit_ mitochondrial precursor [Ajellomyces capsulatus NAm1]	gi%7c154275722 gi%7c150415152	70143	103	5	2	0.03	MSFSGLRSLASATRVWHLRFPSSSAPKPFFPTHLRIKDVYFLLHVPQDHEYDAVVVGAGGAGLRAAFGLAEAGFNTACVSKLFPTRSHTVAAQGGINAALGNMHEDDWRWHMYDTVKGSDWLGDQDAIHYMTREAPQSIIELEGYGCPFSRTEDGKIYQRAFGGQSQKYGKGGQAYRCCAAADRTGHALLHTLYGQSLRHNTNYFIEYFALDLLMEDGECKGIIAYNQEDGTIHRFRAHNTVLATGGYGRAYFSCTSAHTCTGDGMAMVARAGLPNQDLEFVQFHPTGIYGAGCLITEGSRGEGGYLLNSEGERFMERYAPTAKDLASRDVVSRSMTLEIREGRGVGPEKDHIYLQLSHLPAEILHERLPGISETASIFAGVDVTKQPIPVLPTVHYNM…	2.5	SMTLEIR-LGANSLLDLIVFGR-	#
20140324-tam-191-2c	succinate dehydrogenase subunit Sdh1_ putative [Talaromyces marneffei ATCC 18224]	gi%7c212546609 gi%7c210064978	70792	103	5	2	0.03	MSSLSLRSLAPASKISRALRDQRRNFSSTRPAARIFGSNPLRAKAAEGPISQKYPIIDHEYDAVVVGAGGAGLRAAFGLAEAGFNTACVSKLFPTRSHTVAAQGGINAALGNMHKDDWRWHMYDTVKGSDWLGDQDAIHYMTREAPASVRELEGYGCPFSRTEDGLIYQRAFGGQSQDFGKGGQAYRCCAAADRTGHALLHTLYGQSLRHNTNYFIEYFALDLLMEDGECRGIIAYNQEDGTLHRFKAHHTVLATGGYGRAYFSCTSAHTCTGDGMAMVARAGLPNQDLEFVQFHPTGIYGAGCLITEGSRGEGGILLNSEGERFMERYAPTAKDLASRDVVSRSMTLEIREGRGVGPEKDHIYLQLSHLPAELLHERLPGISETASIFAGVDVTKEPI…	2.5	SMTLEIR-LGANSLLDLIVFGR-	#
20140324-tam-191-2c	succinate dehydrogenase [Ajellomyces capsulatus H143]	gi%7c240273542	68882	103	5	2	0.03	MSFSGLRSLASATRFSNAFKDQKRLFSSSRPTARIFANQPLRAKEAPPFVSKNYPVIDHEYDAVVVGAGGAGLRAAFGLAEAGFNTACVSKLFPTRSHTVAAQGGINAALGNMHEDDWRWHMYDTVKGSDWLGDQDAIHYMTREAPQSIIELEGYGCPFSRTEDGKIYQRAFGGQSQKYGKGGQAYRCCAAADRTGHALLHTLYGQSLRHNTNYFIEYFALDLLMEDGECKGIIAYNQEDGTIHRFRAHNTVLATGGYGRAYFSCTSAHTCTGDGMAMVARAGLPNQDLEFVQFHPTGIYGAGCLITEGSRGEGGYLLNSEGERFMERYAPTAKDLASRDVVSRSMTLEIREGRGVGPEKDHIYLQLSHLPAEILHERLPGISETASIFAGVDVTKQPI…	2.5	SMTLEIR-LGANSLLDLIVFGR-	#
20140324-tam-191-2c	Pc20g06030 [Penicillium chrysogenum Wisconsin 54-1255]	gi%7c255944729 gi%7c211587867	71083	103	5	2	0.03	MSSMSLRSLAPASKVSRVLRDQRRLFSSSRPAARIWSNQPLRAKESNGYLTDKYPIIDHEYDALVVGAGGAGLRAAFGLAEAGFKTACVSKLFPTRSHTVAAQGGINAALGNMHEDDWRWHMYDTVKGSDWLGDQDAIHYMTREAPASVRELEGYGCPFSRTEDGRIYQRAFGGQSKDYGKGGQAYRCAAAADRTGHALLHTLYGQSLRHNTNYFIEYFALDLLMEGGECRGVIAYNQEDGTLHRFKAHHTVLATGGYGRAYFSCTSAHTCTGDGMAMVARAGLPNQDLEFVQFHPTGIYGAGCLITEGSRGEGGYLLNSEGERFMERYAPTAKDLASRDVVSRSMTLEIREGRGVGPEKDHIYLQLSHLPAELLHERLPGISETASIFSGVDVTKQPI…	2.5	SMTLEIR-LGANSLLDLIVFGR-	#
20140324-tam-191-2c	succinate dehydrogenase flavoprotein subunit [Paracoccidioides sp. 'lutzii' Pb01]	gi%7c295672341 gi%7c226283697	65501	103	5	2	0.03	MSDCLQDHEYDAVVVGAGGAGLRAAFGLAEAGFNTACISKLFPTRSHTVAAQGGINAALGNMHEDDWRWHMYDTVKGSDWLGDQDAIHYMTREAPQSVIELEGYGCPFSRTEDGKIYQRAFGGQSQKYGKGGQAYRCCAAADRTGHALLHTLYGQSLRHNTNYFIEYFAMDLLMEDGECKGVIAYNQEDGTIHRFRAHNTVLATGGYGRAYFSCTSAHTCTGDGMAMVARAGLPNQDLEFVQFHPTGIYGAGCLITEGSRGEGGYLLNSEGERFMERYAPTAKDLASRDVVSRSMTLEIREGRGVGPEKDHIYLQLSHLPPEILHERLPGISETASIFAGVDVTKQPIPVLPTVHYNMGGIPTRYTGEVLTIDEKGRDKIVPGLYACGEAACVSVHGAN…	2.5	SMTLEIR-LGANSLLDLIVFGR-	#
20140324-tam-191-2c	succinate dehydrogenase subunit A [Corynespora cassiicola]	gi%7c295841391	70946	103	5	2	0.03	MSCLRMRRTQLASQLTKSLRTPTRAFSSTRPAARIFATEHLKAKEASGFISRKYPVIDHEYDAVVVGAGGSGLRAAFGLAEAGFNTACISKLFPTRSHTVAAQGGINAALGNMHEDDWRWHMYDTVKGSDWLGDQDAIHYMTREAPQSVIELENYGCPFSRTDDGRIYQRAFGGQSQKYGKGGQAYRCCAAADRTGHALLHTLYGQSLRHNTKYFIEFFATDLIMEDGVCKGVVAYNQEDGTIHRFLAKNTVLATGGYGRAYFSCTSAHTCTGDGMAMVARAGLPNQDLEFVQFHPTGIYGAGCLITEGSRGEGGYLLNSEGERFMERYAPTAKDLASRDVVSRSMTLEIREGRGVGPEKDHIYLQLSHLPPEILHERLPGISETAAIFSGVDVTKQPI…	2.5	SMTLEIR-LGANSLLDLIVFGR-	#
20140324-tam-191-2c	succinate dehydrogenase [Ajellomyces capsulatus H88]	gi%7c325087445	71123	103	5	2	0.03	MSFSGLRSLASATRFSNAFKDQKRLFSSSRPTARIFANQPLRAKEAPPFVSKNYPVIDHEYDAVVVGAGGAGLRAAFGLAEAGFNTACVSKLFPTRSHTVAAQGGINAALGNMHEDDWRWHMYDTVKGSDWLGDQDAIHYMTREAPQSIIELEGYGCPFSRTEDGKIYQRAFGGQSQKYGKGGQAYRCCAAADRTGHALLHTLYGQSLRHNTNYFIEYFALDLLMEDGECKGIIAYNQEDGTIHRFRAHNTVLATGGYGRAYFSCTSAHTCTGDGMAMVARAGLPNQDLEFVQFHPTGIYGAGCLITEGSRGEGGYLLNSEGERFMERYAPTAKDLASRDVVSRSMTLEIREGRGVGPEKDHIYLQLSHLPAEILHERLPGISETASIFAGVDVTKQPI…	2.5	SMTLEIR-LGANSLLDLIVFGR-	#
20140324-tam-191-2c	similar to succinate dehydrogenase flavoprotein subunit [Leptosphaeria maculans JN3]	gi%7c396472942 gi%7c312215802	70832	103	5	2	0.03	MSCLRMRQTQLARQLTKSFRQSTRAFSSTRPAARIYGTGNLRAKEASGFISQKYPVIDHEYDAIVVGAGGAGLRAAFGLAEAGFNTACISKLFPTRSHTVAAQGGINAALGNMHEDDWRWHMYDTVKGSDWLGDQDAIHYMTREAPQSVIELENYGCPFSRTDDGKIYQRAFGGQSQKYGKGGQAYRCCAAADRTGHALLHTLYGQSLRHNTKYFIEYFATDLIMEDGVCKGVIAYNQEDGTIHRFIAKNTVLATGGYGRAYFSCTSAHTCTGDGMAMVARAGLPNQDLEFVQFHPTGIYGAGCLITEGSRGEGGYLLNSEGERFMERYAPTAKDLASRDVVSRSMTLEIREGRGVGPEKDHIYLQLSHLPAEVLHERLPGISETAAIFAGVDVTKQPI…	2.5	SMTLEIR-LGANSLLDLIVFGR-	#
20140324-tam-191-2c	Stress response protein Rds1_ putative [Penicillium digitatum Pd1]	gi%7c425772229 gi%7c425777408	54467	101	29	1	0.02	MQHTPFTGAPTTTGALKASSIGTGISRGGVAAAATAYPGDGNLHHSEPAPYVPAGGVETNGSTPVYNAKSDFDYESLALALYQEWIELDLFQDGLKRFNDSAFRAAGMTASDRELIAFMAQQEIGHATMLSNILGARAPQQCNYIYPYTNVKEFVDFCQKLTRWGEAGVNGFLAHLDSREAATLLTQSITTEARQQMIFRQFEGLFPMVEWFEVGIPQSWAWTLLAPFISSCPENQTRLIWQNFPTLMVVNQPDPWISGTPRNLSLAHNRNNGYSSAGYDSTGYDPAAYNSHGYNHTQYNFTTSADQISRLNATSGFNQTAGFIFNETTGINNTVGPGVSVPKSPKGSGRLNSSSSRNGCSASVSKIRLIPLTAPGRQVLLQWDLPGKKIGPNNSYITT…	29	EAATLLTQSITTEAR-	#
20140324-tam-191-2c	antioxidant protein [Bordetella avium 197N]	gi%7c187477866 gi%7c501385483 gi%7c115422452	24018	127	53	3	0.09	MAHLRLGDTAPDFEQKSSIGTLRFYDYLGDKWGVLFSHPADFTPVCTTELGYTAKLADEFAKRGVKVLALSVDGEDSHKQWIDDINDTQSTQVNFPILADEDRKVSELYDMIHPNANATLTVRSVFIIDPAKKVRLIITYPASTGRNFNEILRVIDSLQLTDNYSVATPVNWEDGDDVIIVPSLKDETVIKEKFPKGYKALRPYLRITPQPNK	17.6667	SVFIIDPAK-SVFIIDPAKK-LIITYPASTGR-	#
20140324-tam-191-2c	peroxidase [Alcaligenes faecalis]	gi%7c489895722 gi%7c393165183	23796	127	53	3	0.09	MATLRLGDLAPDFEQKSSVGTIKFHEFLGDSWGVLFSHPADFTPVCTTELGYTAKLADEFAKRNVKVIAVSVDDVDSHGKWIDDINETQHTTVNFPILADADRKVSDLYDMIHPNASTTVTVRSVFIIDPAKKVRLIITYPASTGRNFNEILRVIDSLQLTDSHSVATPVNWEDGDDVIIVPSLKDPEVLKQKFPKGYTEIRPYLRVTPQPNK	17.6667	SVFIIDPAK-SVFIIDPAKK-LIITYPASTGR-	#
20140324-tam-191-2c	antioxidant protein [Bordetella holmesii]	gi%7c491154073 gi%7c451923540 gi%7c451926576	23887	127	53	3	0.09	MAHLRLGDTAPDFEQKSSIGTLRLYDYLGDNWGVLFSHPADFTPVCTTELGYTAKLADEFAKRGVKVLALSVDGEESHSKWIDDINDTQSTRVNFPILADEDRKVSELYDMIHPNANATLTVRSVFIIDPAKKIRLIITYPASTGRNFNEILRVIDSLQLTDSHSVATPVNWQDGDDVIIVPSLKDEAVIKEKFPKGYKAVRPYLRITPQPNK	17.6667	SVFIIDPAK-SVFIIDPAKK-LIITYPASTGR-	#
20140324-tam-191-2c	peroxidase [Advenella kashmirensis W13003]	gi%7c565407951	23921	127	53	3	0.09	MSTSLRLGDDAPDFEQNSSTGPIKFHEYLGDSWGVLFSHPADFTPVCTTELGFTAKLKDEFAKRNVKVLAVSVDDADSHNKWIEDINDTQNTTVNFPILADDDRKVSTLYDMIHPNASATATVRSVFIIDPAKKVRLIITYPASTGRNFNEILRVIDSLQLTDSHSVATPVNWEDGQDVIIVPSLKDPEVLKQKFPKGYTEVRPYLRTTPQPNK	17.6667	SVFIIDPAK-SVFIIDPAKK-LIITYPASTGR-	#
	Sample 5#
	21.2mg
	Sesame seed storage proteins
20140324-tam-192-2c	11S globulin seed storage protein 2 [Sesamum indicum]	gi%7c75315270 gi%7c5381325	51798	258	56	6	0.11	MVAFKFLLALSLSLLVSAAIAQTREPRLTQGQQCRFQRISGAQPSLRIQSEGGTTELWDERQEQFQCAGIVAMRSTIRPNGLSLPNYHPSPRLVYIERGQGLISIMVPGCAETYQVHRSQRTMERTEASEQQDRGSVRDLHQKVHRLRQGDIVAIPSGAAHWCYNDGSEDLVAVSINDVNHLSNQLDQKFRAFYLAGGVPRSGEQEQQARQTFHNIFRAFDAELLSEAFNVPQETIRRMQSEEEERGLIVMARERMTFVRPDEEEGEQEHRGRQLDNGLEETFCTMKFRTNVESRREADIFSRQAGRVHVVDRNKLPILKYMDLSAEKGNLYSNALVSPDWSMTGHTIVYVTRGDAQVQVVDHNGQALMNDRVNQGEMFVVPQYYTSTARAGNNGFEWV…	9.33333	ISGAQPSLR-LVYIER-AFYLAGGVPR-GLIVMAR-AGNNGFEWVAFK-SPLAGYTSVIR-	#
20140324-tam-192-2c	11S globulin precursor isoform 4 [Sesamum indicum]	gi%7c81238594	52650	167	25	4	0.09	MAKLFLSLLTFLLLFSLSFALRGSTWQQGQCRISRINAQEPTRRIQAEGGVSEFWDHNSDEFQCAGVSIHRHRLQARALMLPAYHNAPILAYVQQGRGMYGVMISGCPETFESSQQQFEEGRGAQRFRDRHQKIGQFREGDILAFPAGAAHWAYNNGDQELVIVVLQDNANNANQLDPNPRSFFLAGNPAGRGQEQQEYAPQLGRKRGQHQFGNVFRGFDVQILSEVFGVDEQAARSLQGENDERGHIITVARGLQVISPPLQREEYGRQEEEPYYGRRDNGLEETICSAKLRENIDKPSRADIYNPRAGRFSTINSLTLPILSFLQLSAARGVLYRNGIMAPHWCVNAHSVIYVTRGESDMQIVSHNGQAVFDGRVREGQVVVVPQNFAVVKRAGEQG…	6.25	INAQEPTR-GHIITVAR-ADIYNPR-FSTINSLTLPILSFLQLSAAR-	#
20140324-tam-192-2c	11S globulin precursor isoform 3 [Sesamum indicum]	gi%7c81238592	55306	111	9	3	0.06	MANSLLLLSLSLSFLFLFHGCVAQLELQQQRYWQSLQQHQQHRLRAKTECQVQQLTARQPSSRLQSEAGVTEFWDANNEEFQCAGIEFVRHTIQPRGLLLPYYTNAPQLVYIVRGSGIQGTVIPGCAETYESESGVGSTGEEEGRQRTDRHQKLRRFRRGDVLALREGVTHWAYNDGDTPIISVSIRDVANEANQLDLKFRKFFLAGNPQTAQFQGQQEREQQPRGEGRRGQEEGQGTSNIFNGFNEEFLAESFNTDPQLIRKLQSREDNRGIIVRAERPLRLVLPEYGREEQQRQREQGRGGGYMNGLEETICSLRIRENIEHTAATHSYNPRGGRISTINSQTLPILSQLRLSAEKGVLYRNGITAPHWSTNSHSALYVTRGSARIQVVGHKGRSVL…	3	RGDVLALR-AGEQGFEYVTFR-AGEQGFEYVTFRTNDNAMKSELAGR-	#
	mold
20140324-tam-192-2c	ATPB_NEUCR ATP synthase beta chain_ mitochondrial precursor [Aspergillus nidulans FGSC A4]	gi%7c67523719 gi%7c40745270	54818	572	117	10	0.24	MARTFGRAAFARPSPVARRALQPSKLNGFPSFARLASTETAAGGKIHQVIGAVVDVKFEGEKLPAILNAIETENNGQKLVLEVSQHLGENVVRTIAMDGTEGLTRGAPARDTGAPITIPVGPGTLGRIVNVTGDPIDERGPIKATKYAPIHAEAPEFTEQSTTAEILVTGIKVVDLLAPYARGGKIGLFGGAGVGKTVFIQELINNIAKAHGGYSVFTGVGERTREGNDLYHEMQETGVIQLDGESKVSLVFGQMNEPPGARARVALTGLTIAEYFRDEEGQDVLLFIDNIFRFTQAGSEVSALLGRIPSAVGYQPTLAVDMGGMQERITTTTKGSITSVQAVYVPADDLTDPAPATTFAHLDATTVLSRGISELGIYPAVDPLDSKSRMLDPRIVGEE…	11.7	TIAMDGTEGLTR-DTGAPITIPVGPGTLGR-IVNVTGDPIDER-VVDLLAPYAR-IGLFGGAGVGK-VALTGLTIAEYFR-FTQAGSEVSALLGR-GISELGIYPAVDPLDSK-GISELGIYPAVDPLDSKSR-FLSQPFTVAQVFTGIEGK-	#
20140324-tam-192-2c	ATP synthase F1_ beta subunit_ putative [Byssochlamys spectabilis No. 5]	gi%7c557723241	56022	473	107	9	0.2	MFKSGLARTFGRAAYSRPAPVPRRAFEPLRSNALPALSARLASTDASSIGKIHQVIGAVVDVKFDSEKLPPILNALETQNNGQKLVLEVAQHLGENVVRTIAMDGTEGLVRGAHCNDTGAPIKIPVGPATLGRIMNVTGDPIDERGPIKATKFAPIHAEPPEYVEQSTEAEILVTGIKVVDLLAPYARGGKIGLFGGAGVGKTVFIQELINNIAKAHGGYSVFTGVGERTREGNDLYHEMQETRVIQLDGESKVALVFGQMNEPPGARARVALTGLTVAEYFRDEEGQDVLLFIDNIFRFTQAGSEVSALLGRIPSAVGYQPTLAVDMGVMQERITTTKKGSITSVQAVYVPADDLTDPAPATTFAHLDATTVLSRGISELGIYPAVDPLDSKSRMLDP…	11.8889	TIAMDGTEGLVR-VVDLLAPYAR-IGLFGGAGVGK-VALTGLTVAEYFR-FTQAGSEVSALLGR-GISELGIYPAVDPLDSK-GISELGIYPAVDPLDSKSR-IVGDEHYQTASR-FLSQPFTVAQVFTGIEGK-	#
20140324-tam-192-2c	ADP/ATP carrier protein [Byssochlamys spectabilis No. 5]	gi%7c557723494	34277	332	89	6	0.21	MAKGEVNQAEKSVFGMPGFVVDFLMGGVSAAVSKTAAAPIERIKLLIQNQDEMLKAGRLDRKYDGIVDCFRRTAASEGVVSLWRGNTANVIRYFPTQALNFAFRDTYKSMFAFKKDRDGYWKWMAGNLASGGAAGATSLLFVYSLDYARTRLANDAKSAKGGGDRQFNGLVDVYKKTLASDGIAGLYRGFGPSVLGIVVYRGLYFGMYDSIKPVLLVGPLEGSFLASFLLGWTVTTGAGIASYPLDTIRRRMMMTSGEAVKYSSSLDAARQIAAKEGVKSFFKGAGANILRGVAGAGVLSIYDQVQLLLFGKKFKGGSG	14.8333	LLIQNQDEMLK-TAASEGVVSLWR-YFPTQALNFAFR-TLASDGIAGLYR-GFGPSVLGIVVYR-GAGANILR-	#
20140324-tam-192-2c	Pc12g03370 [Penicillium chrysogenum Wisconsin 54-1255]	gi%7c255931331 gi%7c211581841	59549	229	55	6	0.11	MFRNALRSSSRSVAAVSATGRIASVRAAAAGPLNGVRSYASEAKAAPTEVSSILEQRIRGVSEEAGLAETGRVLSVGDGIARVHGMSNVQAEELVEFASGVKGMCMNLEAGQVGVVLFGSDRLVKEGETVKRTGEIVEVPVGPELLGRVVDALGNPIDGKGPLNTKQKARAQLKAPGILPRQSVNQPVQTGMKCVDSMVPIGRGQRELIIGDRQTGKTAVALDTMLNQKRWNNNKAATEDEKLYCIYVAVGQKRSTVAQLVKTLEEQDAMKYSVIIAATASEAAPLQYIAPFTGCAMGEWFRDNGRHAVIIYDDLSKQAVAYRQMSLLLRRPPGREAYPGDVFYLHSRLLERAAKMNKTHGAGSLTALPIIETQGGDVSAYIPTNVISITDGQIFLESE…	9.16667	VLSVGDGIAR-TGEIVEVPVGPELLGR-VVDALGNPIDGK-ELIIGDRQTGK-STVAQLVK-QMSLLLR-	#
20140324-tam-192-2c	ATP synthase subunit alpha [Penicillium digitatum PHI26]	gi%7c425765809 gi%7c425783898	59805	229	55	6	0.11	MFRNALRSSSRSIAAVSATGRIASVRAAVAGPLNGVRSYASEAKATPTEVSSILEQRIRGVSEEAGLAETGRVLSVGDGIARVHGMTNVQAEELVEFASGVKGMCMNLEAGQVGVVLFGSDRLVKEGETVKRTGEIVEVPVGPELLGRVVDALGNPIDGKGPLNTKEKRRAQLKAPGILPRQSVNQPVQTGMKCVDSMVPIGRGQRELIIGDRQTGKTAVALDTMLNQKRWNNRQGATEEEKLYCIYVAVGQKRSTVAQLVKTLEEQDAMKYSVIIAATASEAAPLQYIAPFTGCAMGEWFRDNGRHAVIIYDDLSKQAVAYRQMSLLLRRPPGREAYPGDVFYLHSRLLERAAKMNKTHGAGSLTALPIIETQGGDVSAYIPTNVISITDGQIFLESE…	9.16667	VLSVGDGIAR-TGEIVEVPVGPELLGR-VVDALGNPIDGK-ELIIGDRQTGK-STVAQLVK-QMSLLLR-	#
20140324-tam-192-2c	hypothetical protein SS1G_01081 [Sclerotinia sclerotiorum 1980]	gi%7c156061934 gi%7c154696419	78159	219	47	5	0.07	MQLAAVLSLVGLVTAQCPYGFDTPLQKRESIDAQASSSSFLNQFTINDTDAHFTTDAGGPMQEDTSLKAGERGPTLLEDFIFRQKIQHFDHERVPERAVHARGAGAHGVFTSYGNYSNITAASFLNEQGKETPVFVRFSTVAGSRGSADTARDVHGFATRFYTDEGNFDIVGNNIPVFFIQDAILFPDLIHAVKPSPDNEIPQAATAHDSAWDFFSQQPSSLHTLFWAMAGNGIPRSFRHMDGFGVHTFRLVTDSGSSKLIKWHWKSKQGKASLVWEEAQVLAGKNADFHRKDLWDAIESGNGPEWELGIQVVEEDDVLKFGFDLLDPTKMIPEELVPVERIGVMKLNANPRNYFAETEQIMFQPGHIVRGVDFTDDPLLQGRIFSYLDTQLNRHGGPN…	9.4	GPTLLEDFIFR-FSTVAGSR-DVHGFATR-FGFDLLDPTK-GVDFTDDPLLQGR-	#
20140324-tam-192-2c	catalase [Sclerotinia borealis F-4157]	gi%7c563292078	78743	219	47	5	0.06	MHLTTVLSLVGLVTAQCPYGLNTPPQKRESTDAHISSTSFLNQFTLNDTNAYFTSNAGGPIQENTSLKAGERGPTLLEDFIFREKIQHFDHERVPERAVHARGAGAHGVFTSYGDYSNITAASFLSETGKETPVFVRFSTVAGSRGSADTARDVHGFATRFYTDEGNFDIVGNNIPVFFIQDAILFPDLVHAVKPSPDKEIPQAATAHDSAWDFFSQQPSSLHTLFWAMAGNGIPRSFRHMDGFGVHTFRLVTDSGTSKLIKWHWKSKQGKASLVWEEAQVLAGKNADFHRKDLWDAIESGNGPEWELGIQVVEEDDVLKFGFDLLDPTKILPEELVPVQKIGVMKLNANPRNYFAETEQVMFQPGHIVRGVDFTDDPLLQGRIFSYLDTQLNRHGGPN…	9.4	GPTLLEDFIFR-FSTVAGSR-DVHGFATR-FGFDLLDPTK-GVDFTDDPLLQGR-	#
20140324-tam-192-2c	catalase [Penicillium citrinum]	gi%7c82754305	80681	219	47	5	0.06	MHLLAFATDLVGIANAACPYMTGEVPGDYSPHELHRRADEGAADNTEEFLSQFYLNDKDAYLTSDVGGPIEDQNSLSAGERGPTLLEDFIFRQKIQHFDHERVPERAVHARGAGAHGVFTSYADWSNITAASFLSKKDKETPMFVRFSTVAGSRGSADTARDVHGFATRFYTDEGNFDIVGNNIPVFFIQDAIQFPDLIHAVKPSGDNEIPQAATAHDSAWDFFSQQPSSLHTLLWAMAGHGIPRSFRNVDGFGVHTFRFVTDSGKSKLVKFHWKGLQGKASLVWEEAQQISGKNPDFLRQDLWDAIEAGRFPEWELGVQIMDEEDQLRFGFDLLDPTKIVPEEIIPVTKLGKMTLNRNPRNYFAETEQVMFQPGHIVRGVDFTDDPLLQGRLFSYLDT…	9.4	GPTLLEDFIFR-FSTVAGSR-DVHGFATR-FGFDLLDPTK-GVDFTDDPLLQGR-	#
20140324-tam-192-2c	hypothetical protein PDE_01404 [Penicillium oxalicum 114-2]	gi%7c525580217	79896	217	47	5	0.06	MRAVGLVTGLIGIANAACPYMTGETAGLDRRGEKDAASGTEEFLSEFYLKDDENVFLTSDVGGPIEDQNSLKAGERGPTLLEDFIFRQKIQRFDHERVPERAVHARGAGAHGVFTSYGDWSNITAASFLSAKGKETPMFVRFSTVAGSRGSADTARDVHGFATRFYTDEGNFDIVGNNIPVFFIQDAIKFPDLIHAVKPRGDNEIPQAATAHDSAWDFFSQQPSSLHTLLWAMAGHGIPRSFRHVDGFGVHTYRLVTDKGDTKLVKFHWKGLQGKASLVWEEAQQVSGKNGDFMRQDLFDAIEAGRYPEWELGVQIMEEDDQLRFGFDLLDPTKIVPEELVPVVKLGKMTLNRNPMNYFAETEQVMFQPGHIVRGVDFTDDPLLQGRIYSYLDTQLNRH…	9.4	GPTLLEDFIFR-FSTVAGSR-DVHGFATR-FGFDLLDPTK-GVDFTDDPLLQGR-	#
20140324-tam-192-2c	beta-tubulin [Botryotinia fuckeliana]	gi%7c1002511 gi%7c472245226	49708	217	31	5	0.13	MREIVHLQTGQCGNQIGAAFWQTISGEHGLDGSGVYNGTSDLQLERMNVYFNEASGNKYVPRAVLVDLEPGTMDAVRAGPFGQLFRPDNFVFGQSGAGNNWAKGHYTEGAELVDQVLDVVRREAEGCDCLQGFQITHSLGGGTGAGMGTLLISKIREEFPDRMMATFSVVPSPKVSDTVVEPYNATLSVHQLVENSDATFCIDNEALYDICMRTLKLSNPSYGDLNHLVSAVMSGVTTCLRFPGQLNSDLRKLAVNMVPFPRLHFFMVGFAPLTSRGAHSFRAVTVPELTQQMYDPKNMMAASDFRNGRYLTCSAIFRGKVSMKEVEDQMRNVQNKNSSYFVEWIPNNVQTALCSIPPRGLKMSSTFVGNSTSIQELFKRVGDQFTAMFRRKAFLHWYT…	6.2	AVLVDLEPGTMDAVR-FPGQLNSDLR-LAVNMVPFPR-LHFFMVGFAPLTSR-VGDQFTAMFR-	#
20140324-tam-192-2c	tubulin beta chain [Aspergillus terreus NIH2624]	gi%7c115491491 gi%7c114197233	50123	217	31	5	0.13	MGIGCFVTETELGGGDRVTKLVPLSGTQTISGEHGLDGSGVFNGSSDLQLERMNVYFNEASGNKYVPRAVLVDLEPGTMDAVRAGPFGQLFRPDNFVFGQSGAGNNWAKGHYTEGAELVDQVVDVVRREAEACDCLQGFQITHSLGGGTGAGMGTLLISKIREEFPDRMMATFSVVPSPKVSDTVVEPYNATLSVHQLVEHSDETFCIDNEALYDICMRTLKLSNPSYGDLNHLVSAVMSGVTTCLRFPGQLNSDLRKLAVNMVPFPRLHFFMVGFAPLTSRGAHSFRAVSVPELTQQMFDPKNMMAASDFRNGRYLTCSAIFRGKVSMKEVEDQMRNIQSKNQSYFVEWIPNNIQTALCSIPPRGLKMSSTFIGNSTSIQELFKRVGDQFTAMFRRKA…	6.2	AVLVDLEPGTMDAVR-FPGQLNSDLR-LAVNMVPFPR-LHFFMVGFAPLTSR-VGDQFTAMFR-	#
20140324-tam-192-2c	tubulin beta chain [Coccidioides immitis RS]	gi%7c119184209 gi%7c303320249 gi%7c240109810 gi%7c320031976 gi%7c392865933	49917	217	31	5	0.13	MREIVHLQTGQCGNQIGAAFWQIISGEHGLDSSGMYAGSSDLQLERMNVYFNEAAGRKYVPRAVLVDLEPGTMDAVRAGPFGQLFRPDNFVFGQSGAGNNWAKGHYTEGAELVDQVIDVVRREAEGCDCLQGFQITHSLGGGTGAGMGTLLISKIREEFPDRMMATFSVVPSPKVSDTVVEPYNATLSVHQLVEHSDETFCIDNEALYDICMRTLKLANPSYGDLNHLVSAVMSGVTTCLRFPGQLNSDLRKLAVNMVPFPRLHFFMVGFAPLTSRGAYSFRAITVPELTQQMYDPKNMMAASDFRNGRYLTCSAIFRGKVSMKEVEDQMRNVQNKNHTYFVEWIPNNIQTALCSIPPRGLPMASTFIGNSTSIQELFKRVGDQFTAMFRRKAFLHWYT…	6.2	AVLVDLEPGTMDAVR-FPGQLNSDLR-LAVNMVPFPR-LHFFMVGFAPLTSR-VGDQFTAMFR-	#
20140324-tam-192-2c	tubulin beta chain [Neosartorya fischeri NRRL 181]	gi%7c119495802 gi%7c119412840	49826	217	31	5	0.13	MREIVHLQTGQCGNQIGAAFWQTISGEHGLDGSGHYNGSSDLQLERMNVYFNEANGDKYVPRAVLVDLEPGTMDAVRAGPFGELFRPDNFVFGQSGAGNNWAKGHYTEGAELVDQVIDVVRREAEGCDCLQGFQVTHSLGGGTGAGMGTLLISKIREEFPDRMMATFSVVPSPKVSDTVVEPYNATLSVHQLVEHSDETFCIDNEALYDICMRTLKLSNPSYGDLNHLVSAVMSGVTTCLRFPGQLNSDLRKLAVNMVPFPRLHFFMVGFAPLTSRGAHSFRAVSVPELTQQMFDPKNMMAASDFRNGRYLTCSAIFRGKVSMKEVEDQMRNIQSKNQSYFVEWIPNNIQTALCSIPPRGLKMSSTFIGNSTSIQELFKRVGDQFTAMFRRKAFLHWYT…	6.2	AVLVDLEPGTMDAVR-FPGQLNSDLR-LAVNMVPFPR-LHFFMVGFAPLTSR-VGDQFTAMFR-	#
20140324-tam-192-2c	tubulin beta chain [Aspergillus clavatus NRRL 1]	gi%7c121701811 gi%7c119397313	49910	217	31	5	0.13	MREIVHLQTGQCGNQIGAAFWQTISGEHGLDGSGHYNGTSDLQLERMNVYFNEANGDKYVPRAVLVDLEPGTMDAVRAGPFGELFRPDNFVFGQSGAGNNWAKGHYTEGAELVDQVIDVVRREAEGCDCLQGFQITHSLGGGTGAGMGTLLISKIREEFPDRMMATFSVVPSPKVSDTVVEPYNATLSVHQLVEHSDETFCIDNEALYDICMRTLKLSNPSYGDLNHLVSAVMSGVTTCLRFPGQLNSDLRKLAVNMVPFPRLHFFMVGFAPLTSRGAHSFRAVSVPELTQQMFDPKNMMAASDFRNGRYLTCSAIFRGKVSMKEVEDQMRNIQSKNQTYFVEWIPNNIQTALCSIPPRGLKMSSTFIGNSTSIQELFKRVGDQFTAMFRRKAFLHWYT…	6.2	AVLVDLEPGTMDAVR-FPGQLNSDLR-LAVNMVPFPR-LHFFMVGFAPLTSR-VGDQFTAMFR-	#
20140324-tam-192-2c	tubulin alpha-1 chain [Aspergillus niger CBS 513.88]	gi%7c145239579 gi%7c134076947	49897	217	31	5	0.13	MREIVHLQTGQCGNQIGAAFWQTISGEHGLDGSGVYNGTSDLQLERMNVYFNEASGNKYVPRAVLVDLEPGTMDAVRAGPFGQLFRPDNFVFGQSGAGNNWAKGHYTEGAELVDQVVDVVRREAEACDCLQGFQITHSLGGGTGAGMGTLLISKIREEFPDRMMATFSVVPSPKVSDTVVEPYNATLSVHQLVEHSDETFCIDNEALYDICMRTLKLSNPSYGDLNHLVSAVMSGVTTCLRFPGQLNSDLRKLAVNMVPFPRLHFFMVGFAPLTSRGAYSFRAVSVPELTQQMFDPKNMMAASDFRNGRYLTCSAIFRGRVSMKEVEDQMRNIQSKNQTYFVEWIPNNIQTALCSIPPRGLKMSSTFIGNSTSIQELFKRVGDQFTAMFRRKAFLHWYT…	6.2	AVLVDLEPGTMDAVR-FPGQLNSDLR-LAVNMVPFPR-LHFFMVGFAPLTSR-VGDQFTAMFR-	#
20140324-tam-192-2c	tubulin beta chain [Ajellomyces capsulatus NAm1]	gi%7c154287878 gi%7c150408375	45512	217	31	5	0.14	MREIVHLQTGQCATEKKYVPRAVLVDLEPGTMDAVRAGPFGQLFRPDNFVFGQSGAGNNWAKGHYTEGAELVDQVIDVVRREAEGCDCLQGFQITHSLGGGTGAGMGTLLISKIREEFPDRMMATFSVVPSPKVSDTVVEPYNATLSIHQLVEHSDETFCIDNEALYDICMRTLKLSEPSYGDLNHLVSAVMSGVTTCLRFPGQLNSDLRKLAVNMVPFPRLHFFMVGFAPLTSRGAYSFRAVTVPELTQQMYDPKNMMAASDFRNGRYLTCSAIFRGKVSMKEVEDQMRNVQNKNHTYFVEWIPNNVQTALCSIPPRGLKMSSTFVGNSTSIQELFKRVGDQFTAMFRRKAFLHWYTGEGMDEMEFTEAESNMNDLVSEYQQYQDASISEGEDEYAEE…	6.2	AVLVDLEPGTMDAVR-FPGQLNSDLR-LAVNMVPFPR-LHFFMVGFAPLTSR-VGDQFTAMFR-	#
20140324-tam-192-2c	beta-tubulin_ partial [Aspergillus fumigatus]	gi%7c15625248	44723	217	31	5	0.14	MREIVHLQTGQCGNQIGAAFWQTISGEHGLDGSGHYNGSSDLQLERMNVYFNEANGDKYVPRAVLVDLEPGTMDAVRAGPFGELFRPDNFVFGQSGAGNNWAKGHYTEGAELVDQVIDVVRREAEGCDCLQGFQVTHSLGGGTGAGMGTLLISKIREEFPDRMMATFSVVPSPKVSDTVVEPYNATLSVHQLVEHSDETFCIDNEALYDICMRTLKLSNPSYGDLNHLVSAVMSGVTTCLRFPGQLNSDLRKLAVNMVPFPRLHFFMVGFAPLTSRGAHSFRAVSVPELTQQMFDPKNMMAASDFRNGRYLTCSAIFRGKVSMKEVEDQMRNIQSKNQSYFVEWIPNNIQTALCSIPPRGLKMSSTFIGNSTSIQELFKRVGDQFTAMFRRKAFLHWYT…	6.2	AVLVDLEPGTMDAVR-FPGQLNSDLR-LAVNMVPFPR-LHFFMVGFAPLTSR-VGDQFTAMFR-	#
20140324-tam-192-2c	beta-tubulin [Monilinia fructicola]	gi%7c30961881 gi%7c30961883 gi%7c30961885 gi%7c30961887	44186	217	31	5	0.14	MREIVYLQTGQCGNQIGAAFWQTISGEHGLDGSGVYNGTSDLQLERMNVYFNEASGNKYVPRAVLVDLEPGTMDAVRAGPFGQLFRPDNFVFGQSGAGNNWAKGHYTEGAELVDQVLDVVRREAEGCDCLQGFQITHSLGGGTGAGMGTLLISKIREEFPDRMMATFSVVPSPKVSDTVVEPYNATLSVHQLVENSDETFCIDNEALYDICMRTLKLSNPSYGDLNHLVSAVMSGVTTCLRFPGQLNSDLRKLAVNMVPFPRLHFFMVGFAPLTSRGAHSFRAVTVPELTQQMYDPKNMMAASDFRNGRYLTCSAIFRGKVSMKEVEDQMRNVQNKNSSYFVEWIPNNVQTALCSIPPRGLKMSSTFVGNSTSIQELFKRVGDQFTAMFRRKAFLHWY	6.2	AVLVDLEPGTMDAVR-FPGQLNSDLR-LAVNMVPFPR-LHFFMVGFAPLTSR-VGDQFTAMFR-	#
20140324-tam-192-2c	beta-tubulin [Blumeria graminis f. sp. avenae]	gi%7c31043659	49674	217	31	5	0.13	MREIVHLQTGQCGNQIGAAFWQTISGEHGLDGSGVYNGTSDLQLERMNVYFNEASGNKYVPRAVLVDLEPGTMDAVRAGPFGQLFRPDNFVFGQSGAGNNWAKGHYTEGAELVDQVLDVVRREAEGCDCLQGFQITHSLGGGTGAGMGTLLISKIREEFPDRMMATFSVVPSPKVSDTVVEPYNATLSVHQLVENSDETFCIDNEALYDICMRTLKLSNPSYGDLNHLVSAVMSGVTTCLRFPGQLNSDLRKLAVNMVPFPRLHFFMVGFAPLTSRGAHSFRAVTVPELTQQMFDPKNMMAASDFRNGRYLTCSAILRGKVSMKEVEDQMRNVQLKNVSYFVEWIPNNVQTALCSIPPRGLKMSSTFVGNSTSIQELFKRVGDQFTAMFRRKAFLHWYT…	6.2	AVLVDLEPGTMDAVR-FPGQLNSDLR-LAVNMVPFPR-LHFFMVGFAPLTSR-VGDQFTAMFR-	#
20140324-tam-192-2c	beta-tubulin [Phoma nigrificans]	gi%7c55982586	43154	217	31	5	0.15	GNQIGAAFWQTISGEHGLDGSGVYNGTSDLQLERMNVYFNEASGNKFVPRAVLVDLEPGTMDAVRAGPFGQLFRPDNFVFGQSGAGNNWAKGHYTEGAELVDQVLDVVRREAEGCDCLQGFQITHSLGGGTGAGMGTLLISKIREEFPDRMMATFSVVPSPKVSDTVVEPYNATLSIHQLVENSDETFCIDNEALYDICMRTLKLNNPSYGDLNHLVSAVMSGVTTCLRFPGQLNSDLRKLAVNMVPFPRLHFFMVGFAPLTSRGAHSFRAVTVPELTQQMFDPKNMMAASDFRNGRYLTCSAYFRGKVSMKEVEDQMRNVQDKNSSYFVEWIPNNVQTALCSVPPRGLKMSSTFVGNSTSIQELFKRVGDQFTAMFRRKAFLHWYTGEG	6.2	AVLVDLEPGTMDAVR-FPGQLNSDLR-LAVNMVPFPR-LHFFMVGFAPLTSR-VGDQFTAMFR-	#
20140324-tam-192-2c	beta-tubulin [Leptosphaeria maculans]	gi%7c7673696	49769	217	31	5	0.13	MREIVHLQTGQCGNQIGAAFWQTISGEHGLDGSGVYNGTSDLQLERMNVYFNEASGNKFVPRAVLVDLEPGTMDAVRAGPFGQLFRPDNFVFGQSGAGNNWAKGHYTEGAELVDQVLDVVRREAEGCDCLQGFQITHSLGGGTGAGMGTLLISKIREEFPDRMMATFSVVPSPKVSDTVVEPYNATLSVHQLVENSDETFCIDNEALYDICMRTLKLNNPSYGDLNHLVSAVMSGVTTCLRFPGQLNSDLRKLAVNMVPFPRLHFFMVGFAPLTSRGAHSFRAVTVPELTQQMFDPKNMMAASDFRNGRYLTCSAYFRGKVSMKEVEDQMRNVQNKNSSYFVEWIPNNVQTALCSVPPRGLKMSSTFVGNSTSIQELFKRVGDQFTAMFRRKAFLHWYT…	6.2	AVLVDLEPGTMDAVR-FPGQLNSDLR-LAVNMVPFPR-LHFFMVGFAPLTSR-VGDQFTAMFR-	#
20140324-tam-192-2c	hypothetical protein PDE_01674 [Penicillium oxalicum 114-2]	gi%7c525580485	109231	184	28	5	0.03	MAERRISYAPDVENGDRHRDAGDVNDGSLDEYSALNRYISTARDGRRGSTSSAAALSTKQKKKPFWKFWAKEGDGVVEGWQCPDEWLETDLRSGLSSSDIEPRRKKCGWNELVTEKTNIFVQFIGYFRGPILYVMELAVLLAAGLRDWIDLGVIIGILMLNALVGWYQEKQAADVVASLKGDIAMRAIVVRNGQEEEILARELVTGDIVVVEEGHVIPADVRLICDYSKPEMFEAYKEYLISSQDDTLKEKAEDDDEDSREVHQGVSLIACDQSAITGESLAVDKYMADTCYYTTGCKRGKAYGIVTATARQSFVGKTAALVQGAKDSGHFKAVMDNIGTSLLVLVMFWILAAWIGGFFRHLGIATPENSENTLLRYTLILLIIGVPVGLPVVTTTTLA…	5.6	NGQEEEILAR-AYGIVTATAR-MLTGDAIAIAK-MKAYIQYR-AYIQYR-	#
20140324-tam-192-2c	malate synthase AcuE [Talaromyces marneffei ATCC 18224]	gi%7c212527146 gi%7c210073128	61016	153	27	5	0.08	MTTVETQLQGVSILGTVNNEHRKILTKEAVAFLALLHRTFNSTRKSLLERRIARQAEIDRGHLLDFLPETKHIRENDAWKGAPPAPGLVDRRVEITGPTDRKMVVNALNSDVWTYMADFEDSSAPTWDNMINGQVNLYDAIRRQIDFKIGNKEYKLRTDRTLPTLIARARGWHLEEKHFTVDGEPMSGSLFDFGLYFFHNARELIARGTGPYFYLPKMESHLEARLWNDVFNLAQDYVGLPRGTIRATVLIETITAAFEMDEIIYELRDHSSGLNCGRWDYIFSFIKKFRQNPNFVLPDRSAVTMTVPFMDAYVRLLIKTCHRRGVHAMGGMAAQIPIKDDPQANNIAMENVRKDKLREVRAGHDGTWVAHPALASIASEVFNKHMPTPNQLFNRREDV…	5.4	GAPPAPGLVDR-RVEITGPTDR-VEITGPTDR-TLPTLIAR-SAVTMTVPFMDAYVR-	#
20140324-tam-192-2c	malate synthase AcuE [Talaromyces stipitatus ATCC 10500]	gi%7c242782800 gi%7c218720219	61114	153	27	5	0.08	MTTVETQLQGVSILGSVNNEHRKILTKDAVAFLALLHRTFNSTRKALLERRIVRQAEIDRGLLLDFLPETKHIRENDAWKGAPPAPGLVDRRVEITGPTDRKMVVNALNSDVWTYMADFEDSSAPTWENMINGQVNLYDAIRRQVDFKQGNKEYKLRTDRTLPTLIARARGWHLEEKHFTVDGEPISGSLFDFGLYFFHNARELISRGTGPYFYLPKMESHLEARLWNDVFNLAQDYIGLPRGTIRATVLIETITAAFEMDEIIYELRDHSSGLNCGRWDYIFSFIKKFRQNPNFVLPDRSAVTMTVPFMDAYVRLLIKTCHRRGVHAMGGMAAQIPIKDDPQANDVAMENVRKDKLREVRAGHDGTWVAHPALASIASEVFNKYMPTPNQLFNRREDV…	5.4	GAPPAPGLVDR-RVEITGPTDR-VEITGPTDR-TLPTLIAR-SAVTMTVPFMDAYVR-	#
20140324-tam-192-2c	Pc12g12040 [Penicillium chrysogenum Wisconsin 54-1255]	gi%7c255933099 gi%7c211582639	93822	157	12	5	0.05	MDSDTNRDQIRSLMDRRANIRNMSVIAHVDHGKSTLSDSLVQRAGIISAAKAGEARFMDTRPDEQDRCITIKSTAISLYAKFPDPEDLKEIPQTVDGDEFLINLIDSPGHVDFSSEVTAALRVTDGALVVVDCVSGVCVQTETVLRQALTERIKPVLCINKVDRALLELQVSKEDLYQSFSRTIESVNVIISTYFDKALGDVQVYPDRGTIAFGSGLHGWCFTVRQFAVKYAKKFGVDRKKMLERLWGDNYFNPKTKKWTNKGEHEGKPLERAFNQFILDPIFKIFAAVNHNKRDEIFTLLDKLEVSLTNDEKDLEGKALLKLIMRKFLPAADALLEMICIHLPSPVTAQKYRAETLYEGPTDDKACIGIRDCDPSAPLMLYVSKMVPTSDKGRFYAFG…	2.4	STLSDSLVQR-TILMMGR-FSVSPVVQR-EGPVAEEPMR-GGGQIIPTAR-	#
20140324-tam-192-2c	Translation elongation factor EF-2 subunit_ putative [Penicillium digitatum Pd1]	gi%7c425767905 gi%7c425769718	93801	157	12	5	0.05	MVNFTIEEIRTLMDRRANIRNMSVIAHVDHGKSTLSDSLVQRAGIISAAKAGEARFMDTRPDEQDRCITIKSTAISLYAKFPDPEDLKEIPQAVDGDEFLINLIDSPGHVDFSSEVTAALRVTDGALVVVDCVSGVCVQTETVLRQALTERIKPVLCINKVDRALLELQVSKEDLYQSFSRTIESVNVIISTYFDKALGDVQVYPDRGTIAFGSGLHGWCFTVRQFAVRYAKKFGVDRKKMLERLWGDNYFNPKTKKWTNKSEYEGKTLERAFNQFILDPIFKIFAAVNHNKRDEIFTLLEKLEVSLTNDEKELEGKALLKLVMRKFLPAADALLEMICIHLPSPVTAQKYRAETLYEGPTDDKACIGIRDCDPTAPLMLYVSKMVPTSDKGRFYAFGR…	2.4	STLSDSLVQR-TILMMGR-FSVSPVVQR-EGPVAEEPMR-GGGQIIPTAR-	#
20140324-tam-192-2c	Woronin body protein HexA_ putative [Aspergillus clavatus NRRL 1]	gi%7c121713118 gi%7c119402323	52283	151	62	4	0.08	MAEIEGRGVDPPNQIIEGEVNLDRTSHVEREDTRTSAPLPDPRVYGREEVDLRITKDHRPAPSHKVDEFQVISKDRTHHHQQQQDYRVPEVELSRQRYREPTSRYEPQPQPHQPVYDQALEAQLDITEREYRRRTDPVYEVNNSYDRRSQAPVDSYQGYQSSNTTDVSYQRSKTDYDVSYDKAFAPKPLETYKAASFSREHSVESVPARPSPASSISQVKVLKPYTAIDQPPARKMGYYDDDGNYHSFRRGVERAVDRITHPFHHNHHHHDHDREEVIADERGPVRYREGVREDVRIVEPRSTGNKNAESVPIPCHFIRIGDILILQGRPCQVIRISVSPQTGQHRYLGVDLFTRQLQEESSFVSNPSPSVVVQTMIGPVYKTYRILDLHEDNTITAMT…	15.5	ISVSPQTGQHR-YLGVDLFTR-IRDAFSEGR-ALVINDGGR-	#
20140324-tam-192-2c	malate dehydrogenase_ mitochondrial precursor [Aspergillus terreus NIH2624]	gi%7c115399894 gi%7c114191202	35707	173	31	4	0.13	MFAARQSFNLLQKRAFSASASQASKVAVLGAGGGIGQPLSLLLKLNPRVSELALYDIRGGPGVAADLSHINTNSTVTGFDPTASGLRDALKGSEIVLIPAGVPRKPGMTRDDLFNTNASIVRDLAKAAAEASPEANILVISNPVNSTVPIVSEVFKSKGVYNPKRLFGVTTLDVVRASRFISQVQKTDPAQEAVPVVGGHSGVTIVPLLSQSNHPSIAGKTRDELVNRIQFGGDEVVKAKDGAGSATLSMAMAGARFAESLLKAAQGEKGVIEPTFVDSPLYKDQGVDFFASRVELGPNGAEKILPVGEINEYEQKLLEACLGDLKKNIQKGIDFVKANP	7.75	VAVLGAGGGIGQPLSLLLK-LFGVTTLDVVR-FAESLLK-VELGPNGAEK-	#
20140324-tam-192-2c	hypothetical protein FOXB_14949 [Fusarium oxysporum Fo5176]	gi%7c342872107	62829	140	27	4	0.06	MSHVNLLKAARPAWRASTAISKAAIRPFSVSRQLGTPPILLEDKDKGFGFIRHNKRPPKPRSVGVTEIRGPYYSVMGKRYLQDVLETMGHHVDGLKFAGGSFSLFPEDKLKELINLAHEYNVYVSTGGWMEHVLLQSDPAWAVDQYLKKCKQLGFDVIEISSGFLSIPQDDWLRIVDKVHSAGLIAKPECGIQFGAGGDTEASELSSLGTSDPSKIIHMGKRFIDAGVERIMIESEGITENVKSWRTDVIQQILRELPQEKVMFEAADPKVFNWYLRSGKDGSFHPVPEAQAQKLPGTEKDMNPTSESTKLEGKDEFHEYRAANKLEGAKALITGGDSGIGRSVAVLFAREGADVTIVYLPEEQEDAEETKRMVEKEGHKCLLFAGNLMDNETCKNAVQ…	6.75	GPYYSVMGK-FIDAGVER-VMFEAADPK-ALITGGDSGIGR-	#
20140324-tam-192-2c	Pc21g17590 [Penicillium chrysogenum Wisconsin 54-1255]	gi%7c255956007 gi%7c211590467	48839	124	13	4	0.08	MSASSRIPPIAQPFVSEHAKRTLDLVEEFVEKDCIPADTVFSAQLGEGEKRWTTTPTVLEGLKEKAKKLGLWNMFLPKNHFTQGAGFSNLEYGLMAELLGKSKVASEATNNAAPDTGNMEVFAKYGNDAQKKQWLAPLLEGKIRSAFLMTEPDVASSDATNIELNIRREGNEYVLNGSKWWSSGAGDPRCAIYLVMGKTDPTNPDTYKQQSVILVPAGLPGITVHRMLTVYGYDDAPHGHGHITFKDVRVPASNMVLGEGRGFEIIQGRLGPGRIHHAMRAIGAAERALEWLIARVNDERKMTFGKPLVAHGVILEWIAKSRIEVDAARLIVLNAAIKIDQGDAKSALKEIAQAKVLVPQTALTIIDRAVQAYGAAGVCQDTPLAYLWAGIRTLRIADG…	3.25	GFEIIQGR-ALEWLIAR-SRIEVDAAR-VLVPQTALTIIDR-	#
20140324-tam-192-2c	hypothetical protein CIMG_06562 [Coccidioides immitis RS]	gi%7c119183211 gi%7c303319681 gi%7c240109526 gi%7c320034121 gi%7c392865570	16886	142	23	3	0.23	MSLEQTFIAIKPDGVQRGLVGPIISRFENRGYKLVAMKLVSPSKEHLEKHYADLSDKPFFKGLVTYMLSGPICAMVWEGRDAVKTGRTILGATNPLASAPGTIRGDYAIDVGRNVCHGSDSVENAKKEIALWFSEGELIKYKHSQHEWIYEA	7.66667	GLVGPIISR-TILGATNPLASAPGTIR-GDYAIDVGR-	#
20140324-tam-192-2c	nucleoside diphosphate kinase [Aspergillus clavatus NRRL 1]	gi%7c121718351 gi%7c119404381	16880	142	23	3	0.22	MSNEQTFIAIKPDGVQRGLVGPIISRFENRGFKLVAMKLVSPPKSQLEQHYQDLSDKPFFAGLVSYMLSGPICAMVWEGRDAVKTGRTILGATNPLASAPGTIRGDYAIDVGRNVCHGSDSVENAKKEIALWFKPEELISWKSAAFDWIYEKA	7.66667	GLVGPIISR-TILGATNPLASAPGTIR-GDYAIDVGR-	#
20140324-tam-192-2c	nucleoside diphosphate kinase [Aspergillus niger CBS 513.88]	gi%7c145242650 gi%7c134078451	16997	142	23	3	0.22	MSSEQTFIAIKPDGVQRGLVGPIISRFENRGFKLVALKLCSPGREHLEKHYANLKEKPFFPGLVSYMLSGPICAMVWEGRDAVKTGRTILGATNPLASAPGTIRGDYAIDVGRNVCHGSDSVENAQKEIALWFSPSELQQWKHSQFDWIYEKA	7.66667	GLVGPIISR-TILGATNPLASAPGTIR-GDYAIDVGR-	#
20140324-tam-192-2c	nucleoside diphosphate kinase [Talaromyces marneffei ATCC 18224]	gi%7c212535140 gi%7c210070125	16956	142	23	3	0.22	MSNEQTFIAIKPDGVQRGLVGPIISRFESRGFKLAALKLVSPPRELLEKHYADLSEKPFFPGLVAYMLSGPIVAMVWEGRDAVKTGRTILGATNPLASAPGTIRGDYAIDVGRNVCHGSDSVENAKKEIALWFKEDEVINYKHSQFDWIYEKA	7.66667	GLVGPIISR-TILGATNPLASAPGTIR-GDYAIDVGR-	#
20140324-tam-192-2c	hypothetical protein ASPNIDRAFT_212435 [Aspergillus niger ATCC 1015]	gi%7c350640185	16998	142	23	3	0.22	MSSEQTFIAIKPDGVQRGLVGPIISRFENRGFKLVALKLCSPGREHLEKHYADLKEKPFFPGLVSYMLSGPICAMVWEGRDAVKTGRTILGATNPLASAPGTIRGDYAIDVGRNVCHGSDSVENAQKEIALWFSPSELQQWKHSQFDWIYEKA	7.66667	GLVGPIISR-TILGATNPLASAPGTIR-GDYAIDVGR-	#
20140324-tam-192-2c	hypothetical protein PDE_09504 [Penicillium oxalicum 114-2]	gi%7c525588290	16477	142	23	3	0.23	MADEQTFIAIKPDGVQRGLVGPIISRFENRGFKLVAMKLTSPSQEHLEKHYADLAGKGFFKGLISYMLSGPICAMVWEGKDAVKTGRTILGATNPLASAPGTIRGDYAIDVGRNVCHGSDSVENAKKEIALWFSPSEVLSWKATQAQWVYE	7.66667	GLVGPIISR-TILGATNPLASAPGTIR-GDYAIDVGR-	#
20140324-tam-192-2c	nucleoside diphosphate kinase A [Byssochlamys spectabilis No. 5]	gi%7c557727816	16937	142	23	3	0.22	MSNEQTFIAIKPDGVQRGLVGPIISRFEQRGFKLAALKLVTPSKEHLEQHYADLSDKPFFKGLVSYMLSGPIVAMVWEGREVVKTGRTILGATNPLASAPGTIRGDYAIDVGRNVCHGSDSVESAKKEIALWFGQGEVIEYKHSQQDWIYEKP	7.66667	GLVGPIISR-TILGATNPLASAPGTIR-GDYAIDVGR-	#
20140324-tam-192-2c	Pc13g05940 [Penicillium chrysogenum Wisconsin 54-1255]	gi%7c255936003 gi%7c211583648	96916	161	22	3	0.03	MSELRFDNQTVVVTGAGGGLGKAYALFFASRGANVVVNDLGASHKGEGKSGKAADVVVEEIRAAGGKAVANYDSVENGDAIIETAIKAFGRIDILLNNAGILRDISFKNMKDADWDLINRVHTYGAYKCARAAWPHFRKQKFGRVINTASAAGLFGSFGQANYSAAKLGQVGFTETLAKEGAKYNIIANVIAPIAASRMTATVMPPDVLENLKPDWVVPLVAALVHSSNTTETGGIYEVGGGHVAKLRWERAKGALLKTDDSLTPGAIARKWNDVNDFSQPEYPTGPADFMAFLEDGLKTPSAQPGQEPDFKGRVALVTGGGAGLGRAYCLQFAKLGASVVVNDLVDPEPVVQEIKKLGGKAVGNKASCEDGDAVVKSAIDAFGRIDILVNNAGILRDK…	7.33333	IDILVNNAGILR-LGILGLSR-TSEDQAALYR-	#
20140324-tam-192-2c	transaldolase [Neosartorya fischeri NRRL 181]	gi%7c119479477 gi%7c119407921	35541	104	22	3	0.08	MSSALEQLKATGTVVVCDSGDFATIGKYKPQDATTNPSLILAASKKPEYASLIDAAVQKGKREGKTLDEQVDATLDNLLVEFGKKILEIIPGKVSTEVDARFSFDTQASVDKALHIIKLYEQQGISKDRILIKIASTWEGIKAAHILQSQHGINCNLTLMFSLVQAIAAAEAGAFLISPFVGRILDWYKAAHKRDFSPEEDPGVKSVQSIFNYYKKYGYKTIVMGASFRNTGEITELAGCDYLTISPNLLEELYNSTASVPKKLDASSAASLDIPKRSYINDEATFRFDFNEEAMAVEKLREGISKFAADAVTLKELLKQKIQA	7.33333	VSTEVDAR-FSFDTQASVDK-FAADAVTLK-	#
20140324-tam-192-2c	transaldolase [Aspergillus clavatus NRRL 1]	gi%7c121713044 gi%7c119402286	35371	104	22	3	0.08	MSSALEQLKATGTVVVCDSGDFATIGKYKPQDATTNPSLILAASKKPEYASLIDAAVEKGKKEGKTVDEQVDATLDNLLVEFGKKILEIIPGKVSTEVDARFSFDTQASVDKALHIIKLYEQSGISKDRVLIKIASTWEGIKAAHILQSQHGINCNLTLMFSLVQAIAAAEAGAFLISPFVGRILDWYKAAHKRDYSPEEDPGVKSVESIFNYYKKFGYKTIVMGASFRNTGEITELAGCDYLTISPNLLEDLFNSTAAVPKKLDAAGASSLDISKRSYLNDEALFRFDFNEEAMAVEKLREGISKFAADAVTLKELLKQKIQA	7.33333	VSTEVDAR-FSFDTQASVDK-FAADAVTLK-	#
20140324-tam-192-2c	transaldolase [Byssochlamys spectabilis No. 5]	gi%7c557725967	35365	104	22	3	0.08	MASALDQLKATGTVVVCDSGDFATIGKYKPQDATTNPSLILAASKKPEYAALIDAAVAQGKKEGKTVDEQVDATLDNLLVQFGKEILKIIPGKVSTEVDARFSFDTQASVDKALHIIKLYESIGISKDRILIKIASTWEGIKAAHILQSQHGINCNLTLMFSLVQAIAAAEAGAFLISPFVGRILDWYKAAHKKEYTAAEDPGVKSVQDIFNYYKKHGYNTIVMGASFRNVGEITELAGCDYLTIAPALLEELYNSKDAVPKKLDSASAAKLDIPKRSYLNNESLFRFDFNEEQMAVEKLREGISKFAADAVTLKDILRQKITA	7.33333	VSTEVDAR-FSFDTQASVDK-FAADAVTLK-	#
20140324-tam-192-2c	transaldolase [Aspergillus fumigatus Af293]	gi%7c70997968 gi%7c66851352 gi%7c159126550	35426	104	22	3	0.08	MSSALEQLKATGTVVVCDSGDFATIGKYKPQDATTNPSLILAASKKPEYASLIDAAVQKGKKEGKTLDEQVDATLDNLLVEFGKKILEIIPGKVSTEVDARFSFDTQASVDKALHIVKLYEQQGISKDRILIKIASTWEGIKAAHILQSQHGINCNLTLMFSLVQAIAAAEAGAFLISPFVGRILDWYKAAHKRDFSPEEDPGVKSVQSIFNYYKKHGYKTIVMGASFRNTGEITELAGCDYLTISPNLLEELYNSTASVPKKLDAASAASLDIPKRSYINDEAAFRFDFNEEAMAVEKLREGISKFAADAVTLKELLKQKIQA	7.33333	VSTEVDAR-FSFDTQASVDK-FAADAVTLK-	#
20140324-tam-192-2c	predicted protein [Nectria haematococca mpVI 77-13-4]	gi%7c302883644 gi%7c256721611	85613	103	21	3	0.03	MLATRQVLGNVARSRVLAGAASGIRRLATVSDSPLDKKVRQNLWEENNFINYKKMSENLDIVRARLNRPLTYAEKILYSHLDDPHGQEIERGSSYLKLRPDRVACQDATAQMAILQFMSAGMDAVANPSTVHCDHLIEAQIGGAKDLARAVDINKEVYNFLATACAKYNIGFWRPGSGIIHQIILENYAFPGGLLIGTDSHTPNGGGLGMACIGVGGADAVDVMANLPWELKAPKVIGVKLTGQLNGWTAPKDIILKVADILTVKGGTGAIVEYHGPGTETFSATGMATICNMGAEIGATTSLFPFNERMFDYLAATKRTDIGEFARSYAHGLRSDEGAEYDQLIEINLSELEPYINGPFTPDLGTPISKFSQAVKDNGWPDELKVGLIGSCTNSSYED…	7	MSENLDIVR-LNRPLTYAEK-HLGGLAIITR-	#
20140324-tam-192-2c	Similar to Aconitate hydratase_ mitochondrial_ acc. no. P19414 [Pyronema omphalodes CBS 100304]	gi%7c549045683	84996	103	21	3	0.03	MMSRQIPRASKLASGLRLKQRGMATVTGNPLDKKVEMANTEKGNYINYKKMSENLDIVRARLNRPLTYAEKIVYSHLDDPHGQEIERGKSYLKLRPDRVACQDATAQMAILQFMSAGLPKVATPSTVHCDHLIEAQVGGDKDLARAEEINKEVYDFLSSACAKYGLGFWRPGSGIIHQIILENYAFPGGLLIGTDSHTPNGGGLGMCAIGVGGADAVDVMAGLPWELKAPKVIGVKLTGEMSGWTSAKDIILKVAGILTVKGGTGAIVEYHGPGVDTLSATGMGTICNMGAEIGATTSVFPFNESMYKYLQATKRQEIGDFARSYQNGLQADQGAEFDQLIEINLSELEPHINGPFTPDLATPISKWKETVKREGWPSDLKVGLIGSCTNSSYEDMSRS…	7	MSENLDIVR-LNRPLTYAEK-HLGGLAIITR-	#
20140324-tam-192-2c	hypothetical protein AN0238.2 [Aspergillus nidulans FGSC A4]	gi%7c67515913 gi%7c40746955	89800	150	18	3	0.03	MDGQQIVLARRAVKIEPSYLQRSGCQICGDPSRVPQAPGAWNLGLGSAEDLSHRWTGVLRPIRRESWFLSFRWSVKFVYIFIAAIMKGIFGLSLLPLLVAASPVVVDSIHNGAAPILSSTNAKEVPDSYIVVFKKHVDPVAASVHHSWVQDIHGQKSGGRADLKKRFLGLEFGFGEEIYDGLKATFNIAGSLMGYSGHFHEDTIEEIRKHPDIEYIERNSEVHTLEDTDVEKNAPWGLARISHRDRLTFGTFNKYLYASEGGEGVDVYTIDTGINIEHEDFEGRAFWGKTIPNNDADEDGNGHGTHCSGTIAGKKYGVSKKANIYAVKVLRSSGSGTMADVVQGVEWAVESHLKKAKKGGNGFKGSVANMSLGGGKSKTLEDAVNAGVEAGVHFAVAAG…	6	GSVANMSLGGGK-AVTVGASTLADER-AYFSNYGK-	#
20140324-tam-192-2c	catalase A [Aspergillus clavatus NRRL 1]	gi%7c121703800 gi%7c119398308	83812	105	17	3	0.03	MASAIAGGLHKVQDVVQNTSSKNKKLVDLERDTADAHTKQPLTTDHGVKVSNTDQWLRVTNDRRTGPSLLEDQIAREKIHRFDHERIPERVVHARGTGAFGNFKLKESADDVSCAGILTDMSRNTPVFVRFSTVQGSRGSADTVRDVRGFAVKFYTDEGNWDIVGNNIPVFFIQDAVKFSDFVHAVKPEPHNEVPQAQTAHNNFWDFVYLHPEVTHMFMWTMSDRAIPRSYRMMQGFGVNTYSLINNEGKRHFVKFHFIPHLGVHSLVWDESLKLAGQDPDFHRKDLMEAIDNKAYPKWDFAIQVIPEEKQDDFDFDILDATKIWPEDLVPLRVVGELELNRNVDEFFPQTEQVAFCTSHIVPGIDFSDDPLLQGRNFSYFDTQISRLGINWEELPINR…	5.66667	TGPSLLEDQIAR-NTPVFVR-VVGELELNR-	#
20140324-tam-192-2c	vacuolar ATP synthase subunit B [Aspergillus terreus NIH2624]	gi%7c115384236 gi%7c114196357	57255	94	10	3	0.05	MASEFVDPRMTSIKPRIRYNTIGGINGPLVVLDNVKFPRYNEIVSLTLPDGTERSGQVLEARGNRAVVQVFEGTSGIDVKKTKVEFTGHSLKLGVSEDMLGRVFDGSGRAIDKGPKVLAEDYLDINGQPINPYSRVRQVYPEEMISTGISAIDTMNSIARGQKIPIFSAAGLPHNEIAAQICRQAGLVKRPTKDVHDGHEENFSIVFAAMGVNMETARFFTRDFEENGSMERVTLFLNLANDPTIERIITPRLALTTAEYYAYQLEKHVLVIMTDLSAYCDALREVSAAREEVPGRRGYPGYMYTDLSTIYERAGRVEGRNGSITQIPILTMPNDDITHPIPDLTGYITEGQIFIDRQLYNKGVNPPINVLPSLSRLMKSAIGEGRTRKDHSDVSNQLY…	3.33333	LGVSEDMLGR-TFISQSAYESR-VLDEFYAR-	#
20140324-tam-192-2c	similar to mitochondrial citrate synthase precursor [Botryotinia fuckeliana T4]	gi%7c347832954 gi%7c472239082	51896	75	21	2	0.04	MASLRIGQTALRASMRAPTFGAKSAAFNGLRCYSSKTQTLKERFAEQLPEKIEQIKALRKGYGNKVIGEVTLDQVYGGARGIKSLVWEGSVLDSEEGIRFRGKTIPECQELLPKAPGGQEPLPEGLFWLLLTGEVPSEQQVRDLSAEWAARSDVPKFVEELIDRCPSDLHPMAQFSLAVTALEHESAFAKAYAKGMKKNEYWGHTFEDSMDLIAKLPTIAARIYQNVFKGGKVAAVQKDKDYSFNFANQLGFGENKDFVELMRLYLTIHTDHEGGNVSAHTTHLVGSALSSPMLSLAAGLNGLAGPLHGLANQEVLNWLTKMKAAIGDDLSDEAIKNYLWSTLNAGQVVPGYGHAVLRKTDPRYMAQREFAEKHLPSDPMYKLVSQVYKIAPGVLTEHG…	10.5	IGQTALR-AIGVLPQLIIDR-	#
20140324-tam-192-2c	60S ribosomal protein L2 [Coccidioides immitis RS]	gi%7c119181946 gi%7c303318839 gi%7c240109105 gi%7c320034568 gi%7c392865030	27485	94	19	2	0.07	MGRVIRNQRKGRGSIFTAHTRLNKAPAQFRTLDYAERHGYIRGVVKKIIHDPGRGAPLAQVSFRHPYKFKDITETFIANEGMYTGQFIYAGKNAALTVGNVLPLGSVPEGTVVTNVEEKVGDRGALGRTSGNYVTVIGHNPEEGKTRIKLPSGAKKVVKSRSRGMVGIVAGGGRTDKPLLKASRAKHKFAVKRNSWPKTRGVAMNPVDHPHGGGNHQHIGKASTISRYAAQGQKAGLIAARRTGLLRGTQKTKE	9.5	GSIFTAHTR-GMVGIVAGGGR-	#
20140324-tam-192-2c	60S ribosomal protein L2 [Neosartorya fischeri NRRL 181]	gi%7c119498489 gi%7c119414166	27480	94	19	2	0.07	MGRVIRNQRKGRGSIFTAHTRLNKAPAQFRTLDFAERHGYVRGVVKEIIHDPGRGAPLAKVQFRHPYKFKMVTETFIANEGMYTGQFIYAGKNAALTVGNILPLASVPEGTVVTNVEEKSGDRGALGRTSGNYVTVIGHNPEEGKTRIKLPSGAKKVVKNTARGMVGIVAGGGRTDKPLLKASRAKHKFAVKRNSWPKTRGVAMNPVDHPHGGGNHQHIGKASTISRYAAHGQKAGLIAARRTGLLRGTQKTKE	9.5	GSIFTAHTR-GMVGIVAGGGR-	#
20140324-tam-192-2c	60S ribosomal protein L2 [Ajellomyces capsulatus NAm1]	gi%7c154271760 gi%7c150409403 gi%7c225557832 gi%7c240274052	27471	94	19	2	0.07	MGRVIRNQRKGRGSIFTAHTRLNKAPAQFRTLDYAERHGYTRGVVKEIIHDAGRGAPLAKVSFRHPYKYKDVVETFIANEGMYTGQFIYAGKNATLTVGNILPLGSVPEGTVMTNVEEKVGDRGALGRTSGNYVTVIGHNPEEGKTRVKLPSGAKKVVKSRSRGMVGIVAGGGRTDKPLLKASRAKHKFSVKRNSWPKTRGVAMNPVDHPHGGGNHQHIGKASTISRYASAGQKAGLIAARRTGLLRGTQKTKD	9.5	GSIFTAHTR-GMVGIVAGGGR-	#
20140324-tam-192-2c	60S ribosomal protein L2 [Uncinocarpus reesii 1704]	gi%7c258572094 gi%7c237905091	27545	94	19	2	0.07	MGRVIRNQRKGRGSIFTAHTRLNKAPAQFRTLDYAERHGYIRGVVKKIIHDPGRGAPLAQVSFRHPYKFKDITETFIANEGMYTGQFIYAGKNATLTVGNILPLGSVPEGTVVTNVEEKVGDRGALGRTSGNYVTVIGHNPEEGKTRIKLPSGAKKVVKSRSRGMVGIVAGGGRTDKPLLKASRAKHKYAVKRNSWPKTRGVAMNPVDHPHGGGNHQHIGKASTISRYAAQGQKAGLIAARRTGLLRGTQKTKE	9.5	GSIFTAHTR-GMVGIVAGGGR-	#
20140324-tam-192-2c	60S ribosomal protein [Ajellomyces capsulatus H88]	gi%7c325095560	37468	94	19	2	0.05	MHAVLGLRDNLITEETMLSILKSMTLSPATSAAVPIPSSIPPGNCQLPVALLQVMFRHDGCLIPTQTPSISRRIDITLQPSSAAADSTKNQLDIMGRVIRNQRKGRGSIFTAHTRLNKAPAQFRTLDYAERHGYTRGVVKEIIHDAGRGAPLAKVSFRHPYKYKDVVETFIANEGMYTGQFIYAGKNATLTVGNILPLGSVPEGTVMTNVEEKVGDRGALGRTSGNYVTVIGHNPEEGKTRVKLPSGAKKVVKSRSRGMVGIVAGGGRTDKPLLKASRAKHKFSVKRNSWPKTRGVAMNPVDHPHGGGNHQHIGKASTISRYASAGQKAGLIAARRTGLLRGTQKTKD	9.5	GSIFTAHTR-GMVGIVAGGGR-	#
20140324-tam-192-2c	60S ribosomal protein L8 [Aspergillus fumigatus Af293]	gi%7c70998550 gi%7c66851633 gi%7c159126267	27469	94	19	2	0.07	MGRVIRNQRKGRGSIFTAHTRLNKAPAQFRTLDYAERHGYVRGVVKEIIHDPGRGAPLAKVQFRHPYKFKMVTETFIANEGMYTGQFIYAGKNAALTVGNILPLASVPEGTVVTNVEEKSGDRGALGRTSGNYVTVIGHNPEEGKTRIKLPSGAKKVVKSTARGMVGIVAGGGRTDKPLLKASRAKHKFAVKRNSWPKTRGVAMNPVDHPHGGGNHQHIGKASTISRYAAHGQKAGLIAARRTGLLRGTQKTKE	9.5	GSIFTAHTR-GMVGIVAGGGR-	#
20140324-tam-192-2c	40S ribosomal protein S5 [Scheffersomyces stipitis CBS 6054]	gi%7c126136547 gi%7c126092019	25615	76	14	2	0.08	MSDVEEQYVEEQQEEQPVVQEEFQLVELATPIPAEVQVAHREVKLFNKWSFDDVEVKDVSLVDYIQIRSPVFVSHTAGRYASKRFRKAQCPIVERLTNSLMMNGRNNGKKLKAVRIVKHSLEIINVLTEQNPLQVLVDAIVNSGAREDSTRIGSSGTVRRQAVDVSPLRRVNQAIALLTIGAREASFRNIKTIAECLAEELINAAKGSSTSYAIKKKDELERVAKSNR	7	LTNSLMMNGR-QAVDVSPLR-	#
20140324-tam-192-2c	hypothetical protein Kpol_1008p10 [Vanderwaltozyma polyspora DSM 70294]	gi%7c156839686 gi%7c156114146	24977	76	14	2	0.08	MSDTENPVQEEFEVIEEFTPVELATAIPEEVQRAQYEIKLFNKWSFEDVEVKDASLVDYIQIRQPIFVAHTAGRYANKRFRKAQCPIVERLTNSLMMNGRNNGKKLKAVRIIKHTLEIISVLTDQNPLQVVVDAITNTGPREDTTRVGGGGAARRQAVDVSPLRRINQAISLLTIGAREAAFRNIKTIAETLAEELINAAKGSSTSYAIKKKDELERVAKSNR	7	LTNSLMMNGR-QAVDVSPLR-	#
20140324-tam-192-2c	40S ribosomal protein S5 [Schizosaccharomyces pombe 972h-]	gi%7c19115124 gi%7c17369350 gi%7c8894861	22343	76	14	2	0.09	MAASIIPKEVSLDETGHIKLFNKFPFEGVEVKDISLVDYITIGNGQPLPHTAGRFQTKRFRKARCFIVERLTNSLMMNGRNNGKKLLATRIVKHAFEIIALLTDQNPLQVLVDAVAACGPREDSTRIGSAGTVRRQAVDVSPLRRVNQALALITIGAREAAFRNVKSISECLAEEIINAAKGSSNSYAIKKKDELERVAKSNR	7	LTNSLMMNGR-QAVDVSPLR-	#
20140324-tam-192-2c	hypothetical protein CANTEDRAFT_113540 [Candida tenuis ATCC 10573]	gi%7c344233252 gi%7c344233253	24516	76	14	2	0.08	MAEVEEVQEVPVIQEELKLVELATAIPADVQAAQAEVKLFNKWSFEDVEVKDVSLVDYIQIAQPVFVSHTAGRYAAKRFRKAQCPIVERLTNSLMMNGRNNGKKLKAVRIVEQALEIIHVVTEQNPLQVVVDAIVNSGPREDSTRIGSAGTVRRQAVDVSPLRRVNQAVALITIGAREAAFRNIKTISECLAEELINAAKGSSTSYAIKKKDELERVAKSNR	7	LTNSLMMNGR-QAVDVSPLR-	#
20140324-tam-192-2c	40S ribosomal protein S5 [Tetrapisispora phaffii CBS 4417]	gi%7c367005017 gi%7c357525544	24976	76	14	2	0.08	MSDTEVPVDAVEEFEVVEEFTPVELATAIPEDVQRAQSEIKLFNKWSFDDIEVKDASLVDYIQVRNPVYVGHTAGRYANKRFRKAQCPIIERLTNSLMMNGRNNGKKLKAVRIVKHTLEIINVLSEQNPLQVVVDAIANSGPREDTTRVGGGGAARRQAVDVSPLRRVNQAISLLTIGAREASFRNIKTIAETLSEELINAAKGSSTSYAIKKKDELERVAKSNR	7	LTNSLMMNGR-QAVDVSPLR-	#
20140324-tam-192-2c	40S ribosomal protein S5 [Marssonina brunnea f. sp. 'multigermtubi' MB_m1]	gi%7c406861749	23845	76	14	2	0.08	MSDNEEIEVETVSGYQVLPKDVTAEIGSIKLFNKWSYEDVEIRDISLTDYIQIRAPVYISHSAGRYAQKRFRKAQCPIIERLTNSLMMNGRNNGKKLMAVRIVAHAFEIVHIMTDQNPIQVAVDAIVNCGPREDSTRIGSAGTVRRQAVDVSPLRRVNQAIALLTIGAREAAFRNIKSVAECLAEELINAAKGSSNSYAIKKKDELERVAKSNR	7	LTNSLMMNGR-QAVDVSPLR-	#
20140324-tam-192-2c	40S ribosomal protein S5 [Ashbya gossypii ATCC 10895]	gi%7c45185402 gi%7c44981091 gi%7c374106323	25171	76	14	2	0.08	MSDHEAPVEVQEDFEVVQEFVPTKLATAIPEEVQLAQQEIKLFNKWSFEEIEVKDPSLVDYIQVRQPIFVSHTAGRYANKRFRKAQCPIIERLTNSLMMNGRNNGKKLKAVRIIKHTLEIINVLTDQNPLQVVVDAIINSGPREDTTRVGGGGAARRQAVDVSPLRRVNQAIALLTIGAREASFRNIKTIAETLAEELINAAKGSSTSYAIKKKDELERVAKSNR	7	LTNSLMMNGR-QAVDVSPLR-	#
20140324-tam-192-2c	ribosomal 40S subunit protein S5 [Saccharomyces cerevisiae S288c]	gi%7c6322583 gi%7c1173269 gi%7c313103670 gi%7c315113451 gi%7c315113479 gi%7c364506101 gi%7c364506139 gi%7c558704753 gi%7c558704795 gi%7c895891 gi%7c1015849 gi%7c51013187 gi%7c151945188 gi%7c190409595 gi%7c207343771 gi%7c256273096 gi%7c259147586 gi%7c285813010 gi%7c323304292 gi%7c323332908 gi%7c323336893 gi%7c323347834 gi%7c323354294 gi%7c349579306 gi%7c365764768 gi%7c392298552	25023	76	14	2	0.08	MSDTEAPVEVQEDFEVVEEFTPVVLATPIPEEVQQAQTEIKLFNKWSFEEVEVKDASLVDYVQVRQPIFVAHTAGRYANKRFRKAQCPIIERLTNSLMMNGRNNGKKLKAVRIIKHTLDIINVLTDQNPIQVVVDAITNTGPREDTTRVGGGGAARRQAVDVSPLRRVNQAIALLTIGAREAAFRNIKTIAETLAEELINAAKGSSTSYAIKKKDELERVAKSNR	7	LTNSLMMNGR-QAVDVSPLR-	#
20140324-tam-192-2c	likely cytosolic ribosomal protein S5 [Candida albicans SC5314]	gi%7c68470530 gi%7c68470791 gi%7c46442519 gi%7c46442654 gi%7c238882703	25268	76	14	2	0.08	MSDVEEQYQEEQQPVVQEELQVVELATTIPLDVQEAQREVKLFNKWSFEDVEVKDVSLVDYIQIRNPVFVSHTAGKYASKRFRKAQCPIVERLTNSLMMNGRNNGKKLKAVRIVKHALEIIHVLTEQNPIQVVVDAIVNSGAREDSTRIGSSGTVRRQAVDVSPLRRVNQAIALLTIGAREASFRNIKTIAECLAEELINAAKGSSTSYAIKKKDELERVAKSNR	7	LTNSLMMNGR-QAVDVSPLR-	#
20140324-tam-192-2c	Pc18g02110 [Penicillium chrysogenum Wisconsin 54-1255]	gi%7c255942573 gi%7c211586788	28956	104	13	2	0.09	MAAVQGAISKRRKFVADGVFYAELNEFFQRELAEEGYSGVEVRVTPTVTDIIVRATHTQEVLGEQGRRIRELTSLIQKRFKFPENSVSLYAAKVQNRGLSAVAQCESLRYKLLNGLAVRRACYGVLRFIMESGAKGCEVVVSGKLRAARAKSMKFTDGFMIHSGQPAKEFIDSATRHVLLRQGVLGIKVKIMRGSDPEGKAGPQKTLPDSVTIIEPKEEQPVLQPMSQDYGAKAIAAQQAAEQQRLAEQQAAEAEGGAETFAQE	6.5	ELAEEGYSGVEVR-VTPTVTDIIVR-	#
20140324-tam-192-2c	40s ribosomal protein [Trichoderma reesei QM6a]	gi%7c340522228	28901	104	13	2	0.09	MSHPGAQISKRRKFVADGVFYAELNEFFQRELAEEGYSGVEVRVTPTVTDIIVRATHTQEVLGEQGRRIRELTSLIQKRFKFPENSVSLYAAKVQNRGLSAVAQCESLRYKLLNGLAVRRACYGVLRFIMESGAKGCEVVVSGKLRAARAKSMKFTDGFMIHSGQPAKDFIDSATRHVLLRQGVLGIKVKIMRGSDPEGKAGPQKSLPDAVTIIEPKEEQAVLQPVSQDYGAKAAQAVAQGSQDIRVAEQEGATEEAQPAAEEQ	6.5	ELAEEGYSGVEVR-VTPTVTDIIVR-	#
20140324-tam-192-2c	hypothetical protein TRIATDRAFT_298935 [Trichoderma atroviride IMI 206040]	gi%7c358397895	28873	104	13	2	0.09	MSHPGAQISKRRKFVADGVFYAELNEFFQRELAEEGYSGVEVRVTPTVTDIIVRATHTQEVLGEQGRRIRELTSLIQKRFKFPENSVSLYAAKVQNRGLSAVAQCESLRYKLLNGLAVRRACYGVLRFIMESGAKGCEVVVSGKLRAARAKSMKFTDGFMIHSGQPAKDFIDSATRHVLLRQGVLGIKVKIMRGSDPEGKAGPQKSLPDAVTIIEPKEEAAVLQPVSQDYGAKAAQAQASQDARVAEQEGAAEEEAQPAAEEQQ	6.5	ELAEEGYSGVEVR-VTPTVTDIIVR-	#
20140324-tam-192-2c	hypothetical protein PDIP_73820 [Penicillium digitatum Pd1]	gi%7c425768995 gi%7c425770579	28924	104	13	2	0.09	MAAVQGAISKRRKFVADGVFYAELNEFFQRELAEEGYSGVEVRVTPTVTDIIVRATHTQEVLGEQGRRIRELTSLIQKRFKFPENSVSLYAAKVQNRGLSAVAQCESLRYKLLNGLAVRRACYGVLRFIMESGAKGCEVVVSGKLRAARAKSMKFTDGFMIHSGQPAKEFIDSATRHVLLRQGVLGIKVKIMRGSDPEGKAGPQKTLPDSVTIIEPKEEQPVLQPVSQDYGAKAIAAQQAAEQQRLAEQQAAEAEGGAETFAQE	6.5	ELAEEGYSGVEVR-VTPTVTDIIVR-	#
20140324-tam-192-2c	conserved hypothetical protein [Aspergillus terreus NIH2624]	gi%7c115391461 gi%7c114194159	37790	106	11	2	0.06	MSTAETLTPTNGKAPAQPIDHAHAHASRLVNVQPARLADLQPRYAQRLEHDEENPEAHGWYAGLIHGLGECIGFLGAIPCCICCPNPYKPVAQGEVGLVSKFGRFERAVDPGLVKVNPLSEHLTAVDVKIQIVEVPRQVCMTKDNVTLNLTSVIYYQIISPHKAAFGITNVRQALVERTQTTLRHVIGARVLQDVIERREEIAQSTSEIIEDVAAGWGVQVESMLIKDIIFSNDLQDSLSMAAQSKRIGESKVIAARAEVESAKLMRQAADILSSAPAMQIRYLEAMQSMAKTANSKVIFLPAMNQTVQQQLAAAENAGEGPSRYGSGSQVDEGFQRAMNARVVEDI	5.5	VLQDVIER-QAADILSSAPAMQIR-	#
20140324-tam-192-2c	hypothetical protein CHGG_08154 [Chaetomium globosum CBS 148.51]	gi%7c116199997 gi%7c88179433	34916	106	11	2	0.07	MNHTSDDQGSSKGKAPSSGNGGFRAQANMKVEPPKPEDLQRSYASIVEEVHYPGWYGAMINCLGEVIGTLGAIPCCICCPNPFKKVNQGNVGLVTKFGRFYKAVDPGPLGQQTCMTKDNVTLHLTSVIYYHIVSPHKAAFGISNIRQALIERTQTTLRHVVGARVLQDVIERREEVAQSIGEIIEDVATGWGVQVESMLIKDIIFSQELQESLSMAAQSKRIGESKIIAAKSRSAKLMRQAADILSSAPAMQIRYLEAMQAMAKSANSKVIFLPAANQTMPNSAAMNAAIANNSDPFAEGSSSAEHGGDPGFQQAMNARVIENI	5.5	VLQDVIER-QAADILSSAPAMQIR-	#
20140324-tam-192-2c	stomatin family protein [Neosartorya fischeri NRRL 181]	gi%7c119490929 gi%7c119411285	37405	106	11	2	0.06	MSTEANIPNGKAPVQSAPGHSAHTRGPVVVQPARLADLQPSYAQQIQHNADNPDAHSWYASLIHTLGECIGGLGAIPCCICCPNPFKPVAQGEVGLVTKFGRFERAVDPGLVRVNPLSEHLTTVDVKIQIVEVPRQVCMTKDNVTLNLTSVIYYQIISPHKAAFGISNVRQALIERTQTTLRHVIGARVLQDVIERREEIAQSTSEIIEEVAAGWGVLVESMLIKDIIFSNDLQDSLSMAAQSKRIGESKVIAARAEVESAKLMRQAADILSSAPAMQIRYLEAMQAMAKTANSKVIFLPAVNQTVQQQLAAADNAGEGPSNYGAGQPVQADDGFQRAINARVVEDI	5.5	VLQDVIER-QAADILSSAPAMQIR-	#
20140324-tam-192-2c	stomatin family protein [Aspergillus clavatus NRRL 1]	gi%7c121706122 gi%7c119399470	37630	106	11	2	0.06	MSTEAIIPNGKAPAQEHEVTSSHRHGPVSVQPARLADLQPRYAQQIQHDADNPEAHGWYASMIHGLGECIGFFGAIPCCICCPNPFKPVDQGEVGLVSKFGRFERAVDPGLVKVNPLSEHLTTIDVKIQIVEVPRQVCMTKDNVTLNLTSVIYYQIISPHKAAFGISNVRQALVERTQTTLRHVIGARVLQDVIERREEIAQSTAEIIEEVASGWGVQVESMLIKDIIFSNDLQDSLSMAAQSKRIGESKVIAARAEVESAKLMRQAADILSSAPAMQIRYLEAMQAMAKTANSKVIFLPAMNQTVQQQLAAADNAGEGPSRYSGATQADDGFQRAMNARVVEDI	5.5	VLQDVIER-QAADILSSAPAMQIR-	#
20140324-tam-192-2c	stomatin family protein [Aspergillus niger CBS 513.88]	gi%7c145233383 gi%7c134056992 gi%7c350634878	37605	106	11	2	0.06	MSAERSADINGKAPVQQPTNSARATQGAGLVNVQPARLDDLQPKYAQQIQHGEDNPDAHGWYASFIHGLGECIGCLGAIPCCFCCPNPFKPVAQGEVGLITRFGRFERSVDPGLVKVNPLSEHLTAVDVKIQIVEVPRQSCMTKDNVNLNLSSVIYYQIVSPHKAAFGISNIRQALVERTQTTLRHVIGARVLQDVIERREEIAQSTSEIIEDVAGGWGVQVESMLIKDIIFSNDLQDSLSMAAQSKRIGESKVIAARAEVESAKLMRQAADILSSAPAMQIRYLEAMQSMAKTANSKVIFLPAMNQTVQQQMAAAENAGEGPSRYQQPDDGFQRAMNARVVEDI	5.5	VLQDVIER-QAADILSSAPAMQIR-	#
20140324-tam-192-2c	stomatin-like protein [Fusarium fujikuroi]	gi%7c15721878	38411	106	11	2	0.06	MSSTEGMINGGGSSSANPTKAPVMEGNGGFMAQHKMAVEPPKKEDLQRSYATVVENDANPKGWYGSMMNALGTIIGTMGAVPCCIICPNPFKEVNQGNVGLVTKFGKFYKAVDPGLVNINPLSERLIQIDVKIQTTEVPEQICMTKDNVTLRLTSVIYYHIVSPHKAAFGINNVKQALMERTQTTLRHVVGARVLQDVIERREEIAQSIGEIIEDVAAGWGVQVESMLIKDIVFSQELQESLSMAAQSKRIGESKIIAAKAEVESAKLMRQAADILSSAPAMQIRYLEAMQAMAKSANSKVIFLPAANQTMGNALNAAMANQTGESSARALDNENDFGGQDPGFQQAMNARVVENI	5.5	VLQDVIER-QAADILSSAPAMQIR-	#
20140324-tam-192-2c	hypothetical protein [Podospora anserina S mat+]	gi%7c171690164 gi%7c170945030	37437	106	11	2	0.06	MSSDTQSIPKGKGSETLNGGFKPQGNMVAVVPPKPEDLQRSYATVVDANANPKGWYGSMVNGIGTLIGTLGAVPCCVCCPNPYKSVGQGHVGLVTKFGKFYKAVDPGLVKVNPLSENLIQVDVKIQIVEVPKQVCMTKDNVSVHLTSVIYYHIVAPHKAAFGITNVRQALIERTQTTLRHVVGARVLQDVIERREELAQSIGEIIEDVAAGWGVQVESMLIKDIIFSNELQESLSMAAQSKRIGESKIIAAKAEVEAAKLMRQAADILSSAPAMQIRYLEAMQAMAKSANSKVIFLPAVNQTMPSTQQFENSLAGGSGNKNYNTFDEGSSSTDPGFQQAINARIIENI	5.5	VLQDVIER-QAADILSSAPAMQIR-	#
20140324-tam-192-2c	stomatin family protein [Talaromyces stipitatus ATCC 10500]	gi%7c242782030 gi%7c218720067	38808	106	11	2	0.06	MASSVTNPPSTNGHTSANGKAPQVPTNQASLVHVQPARVEDLQPRYAQQIKHDDDNPDAHGWYASMIHGLGECMGCLGAIPCCLLCPNPFKSVAQGEVGLISRFGRFERAVDPGLVKVNPLSERLTTVDVKIQIVEVPRQVCMTKDNVNLNLTSVIYYHIISPHKTAFGIADVRQALVERTQTTLRHVVGARVLQDVIERREEIAQSISEIIEDVAAGWGVKVESMLIKDIIFSNDLQDSLSMAAQSKRIGESKVIAARAEVESAKLMRQAADILSSAPAMQIRYLEAMQAMAKTANSKVIFLPAPGQTVSQQLSLAENLGEGPSKYQTLDNNWNTGNENDDGFQRAVNARVVENI	5.5	VLQDVIER-QAADILSSAPAMQIR-	#
20140324-tam-192-2c	Pc13g14820 [Penicillium chrysogenum Wisconsin 54-1255]	gi%7c255938233 gi%7c211584507	36738	106	11	2	0.06	MSDNGASTSKAPATDRAPDRALIDVQPFRMSDLQPKYAHQIDRPADSDATGWYASLIHSLGECIGFFGAIPCCFCCPNPFKPVDQGEVGLISRFGRFERSVDPGLVKINPLSEHITTVDVKIQIVEVPRQVCMTKDNVTLNLTSVIYYQVVSPHKTAFGISNVRQALVERTQTTLRHVIGARVLQDVIERREEIAQSTSEIIEEVASGWGVKVESMLIKDIIFSNDLQDSLSMAAQSKRIGESKVIAARAEVESAKLMRQAADILSSAPAMQIRYLEAMQAMAKTANSKVIFLPAPGQTVQSQLNAADNFGEGPSKYGATDNTGLQHAVNARVVEDI	5.5	VLQDVIER-QAADILSSAPAMQIR-	#
20140324-tam-192-2c	hypothetical protein AN3163.2 [Aspergillus nidulans FGSC A4]	gi%7c67525411 gi%7c40744558	32588	106	11	2	0.07	MSAESSTAINTAANTGVNGKATQQPHGLVEVQPPRLSDLQPRYASTIEHDDSNPEAHGWYASFNPGLVKVNPLSERLITIDVKIQIVEVPRQICMTKDNVTLNLTSVIYYQVVSPHKAAFGISNIKQALVERTQTTLRHVIGARVLQDVIERREEIAQSTSEIIEEVASGWGVNVESMLIKDIIFSDDLQDSLSMAAQSKRIGESKVIAARAEVESAKLMRQAADILSSAPAMQIRYLEAMQAMAKTANSKVIFLPAPNQTVQQQLAAAENAGEGPSRYAPPQGGDGFQHAINARVVEDI	5.5	VLQDVIER-QAADILSSAPAMQIR-	#
20140324-tam-192-2c	mitochondrial phosphate carrier protein [Byssochlamys spectabilis No. 5]	gi%7c557721624	34026	109	10	2	0.08	MASSAPPTSTGNAKVDAVAQEAVAATSQLSGLQLYSRFAFAGAVCCSVTHGALTPVDVVKTRIQLDPVTYNRGLIGGFRQVIQKEGAGALLTGFGPTAAGYFLQGAFKFGGYEFFKQQFINQLGYETASNNRTAVYLGSSALAEFFADIALCPLEATRIRLVSEPTFASGLVSGFGKIAKNEGLGAFYSGFGPILFKQVPYTMAKFVVFEKVSEQIFRRVDKSTLSDGAVTGVNLGSGLIAGFAAALVSQPADTMLSKINKTKGLPGEGTISRLIKIGKELGFRGSYAGIGARLFMVGTLTAGQFAIYGDIKRMLGATGGVEISK	5	LVSEPTFASGLVSGFGK-GSYAGIGAR-	#
20140324-tam-192-2c	aldehyde dehydrogenase [Patulibacter medicamentivorans]	gi%7c494848646 gi%7c365815891	53294	106	8	2	0.04	MGVQHHKMFIGGEWRDAADAYEIRNPANEELVATVAKGGADDVDAAVAAARAAFRSGCWSGLTGDERRAVMLRIAEGVSENLEELIELEIAANGATVRQAGGFHIGLAAPHMTYFAELAAKHEVERGIATAPYPTISHNILRREPIGVCAGILPWNFPLVLSLWKIGPALAAGNTVVIKTDEKTPLSTLAFARIAHEAGLPAGVLNVITGDGEDVGARLASHPDVGKVAFTGSTAVGREIMRLASQTVKKVSLELGGKGAAVVLDDADLETVADAALFGCCLYSGQMCESITRLIVPDSIHDELVARIVARAATIKLGDPADYDTDLGPVISAEQHERILSYLQIGRDEGATVATGGGVPEGPGFEKGFWVQPTVFTDVTNDMRIAREEIFGPVLTVIR…	4	IGPALAAGNTVVIK-VAFTGSTAVGR-	#
20140324-tam-192-2c	60S ribosomal protein L3 [Chaetomium globosum CBS 148.51]	gi%7c116204627 gi%7c88176325	44078	99	8	2	0.04	MSHRKYEAPRHGSLAYLPRKRAARHRGKVKSFPKDDAKKPVHLTAAMGYKAGMTTIVRDLDRPGAKAHKKEVVEAVTIIDTPPMMVVGLVGYIETPRGLRSLTTVWAEHLSDEVKRRFYKNWYKSKKKAFTKYAKKHSENSGASITRELERIKKYCTVVRVLAHTQIRKTPLKQKKAHLMEIQINGGSVADKVEFGHGLFEKPVSVDSIFEKDEMIDVIAVTKGHGFSGVTARWGTKKLPRKTHKGLRKVACIGAWHPSHVQWTVARAGQMGYHHRTSVNHKVYRIGKGDADDSAATEIDVTKKKITPMGGFVRYGEVNNDFVMVKGSVPGVKKRVMTLRKSMFTHTSRRALEKVELKWIDTSSEFGHGAFQTPAEKKQYQGTLKKDLAVAA	4	HGSLAYLPR-AGMTTIVR-	#
20140324-tam-192-2c	60S ribosomal protein L3 [Botryotinia fuckeliana B05.10]	gi%7c154301761 gi%7c347828492 gi%7c472240301	44224	99	8	2	0.04	MSHRKFEAPRHGSLAYLPRKRASRHRGKVKSFPKDDKTKPVHLTATLGYKAGMTTIVRDLDRPGAKTHKKEVVEAVTVIETPPVIVVGLVGYIETPRGLRSLTTVWAEHLSDEVKRRFYKNWYKSKKKAFTKYAKKHSENSGSSITRELERIKKYCTVVRVLAHTQIRKTPLKQKKAHLMEIQVNGGSVAEKVDFASGLFEKPVEISSIFEQDEMIDVIAVTKGHGFSGVTSRWGTKKLPRKTHKGLRKVACIGAWHPAHVQWTVARAGQDGYHHRTSCNHKVYRIGRGDDPNNAATEFDVSKKAITPMGGFVRYGEVKNDFIMLKGSVPGVKKRVMTLRKSMFVHTSRKALEKVELKWIDTSSKFGHGAYQTAEEKHQFLGTLKKDIAQSS	4	HGSLAYLPR-AGMTTIVR-	#
20140324-tam-192-2c	60S ribosomal protein L3 [Sclerotinia sclerotiorum 1980 UF-70]	gi%7c156065829 gi%7c154691784	44183	99	8	2	0.04	MSHRKFEAPRHGSLAYLPRKRASRHRGKVKSFPKDDKTKPVHLTATLGYKAGMTTIVRDLDRPGAKTHKKEVVEAVTVIETPPVIVVGLVGYIETPRGLRSLTTVWAEHLSDEVKRRFYKNWYKSKKKAFTKYAKKHSENSGSSITRELERIKKYCTVVRVLAHTQIRKTPLKQKKAHLMEIQVNGGSVAEKVDFASGLFEKPVEIGSIFEQDEMIDVIAVTKGHGFSGVTSRWGTKKLPRKTHKGLRKVACIGAWHPAHVQWTVARAGQDGYHHRTSCNHKVYRIGRGDDPNNAATEFDVSKKAITPMGGFVRYGEVKNDYIMLKGSVPGVKKRVMTLRKSMFVHTSRKALEKVELKWIDTSSKFGHGAYQTAEEKHTFLGTLKKDIAQSS	4	HGSLAYLPR-AGMTTIVR-	#
20140324-tam-192-2c	60S ribosomal protein L3 [Neurospora crassa OR74A]	gi%7c164424622 gi%7c30580497 gi%7c28881190 gi%7c157070591 gi%7c336468587 gi%7c350289142	44008	99	8	2	0.04	MSHRKYEAPRHGSLAYLPRKRAARHRGKVKSFPKDDAKKPVHLTAAMGYKAGMTTIVRDLDRPGAKAHKKEVVEAVTIIDTPPMIVVGLVGYIETPRGLRSLTTVWAEHLSDEVKRRFYKNWYKSKKKAFTKYVKKHSDNNGAAITRELERIKKYCTVVRVLAHTQIRKTPLKQKKAHLMEIQINGGSVADKVEFGHGLFEKPVSIDSIFEKDEVIDVIAVTKGHGFTGVTARWGTKKLPRKTHKGLRKVACIGAWHPSHVQWTVARAGQAGYHHRTSVNHKIYRIGKGDAEDSAATEVDVTKKKITPMGGFVRYGEINNDFVMVKGSVPGVKKRVMTLRKSMFVHTSRKALEKVELKWIDTSSEFGHGAFQTPAEKKQFQGTLKKDLAASS	4	HGSLAYLPR-AGMTTIVR-	#
20140324-tam-192-2c	hypothetical protein [Podospora anserina S mat+]	gi%7c171689180 gi%7c170944552	44115	99	8	2	0.04	MSHRKYEAPRHGSLAYLPRKRAARHRGKVKSFPKDDAKKPVHLTAAMGYKAGMTTIVRDMDRPGAKANKKEVVEAVTIIDTPPMIVVGLVGYIETPRGLRSLTTVWAEHLSDEVKRRFYKNWYKSKKKAFTKYAKKHSENSGASITRELERIKKYCTVVRVLAHTQIRKTPLKQKKAHLMEIQINGGSVADKVEFGHGLFEKPVSIDTIFEKDEMIDVIAVTKGHGFSGVTARWGTKKLPRKTHKGLRKVACIGAWHPSHVQWTVARAGQMGYHHRTSVNHKVYRIGKGDADDNAATEIDVTKKTITPMGGFVRYGEIKNDFVMVKGSVPGTKKRIMTLRKSMFIHTSRKALEKVELKWIDTSSEFGHGAFQTPAEKKQYQGTLKKDLAASS	4	HGSLAYLPR-AGMTTIVR-	#
20140324-tam-192-2c	60S ribosomal protein L3 [Talaromyces marneffei ATCC 18224]	gi%7c212536953 gi%7c210068374	44205	99	8	2	0.04	MSHRKYEAPRHGSLAYLPRKRAARHRGKVKSFPKDDPKKPVHLTASMGYKAGMTTIVRDLDRPGAKMHKKEVVEAVTVIETPPLVAVGVVGYIETPRGLRSLTTVWAEHLSDELKRRFYKNWYKSKKKAFTRYTKKHTESSAASVTRELERIKKYCTVVRILAHTQIRKTPLKQKKAHLMEIQVNGGSIADKVEFAHGLFEKTIDIDTIFEQNEVIDVIAVTKGHGFNGVTSRWGTKKLPRKTHKGLRKVACIGAWHPSHVQWTVARAGQMGYHHRTSVNHKIYRIGKGSDEGNASTEFDVSKKTITPLGGFVRYGEVKNDFVIVKGSVPGVKKRVMTLRKTLYPQVSRKATEKIDLKWIDTSSEFGHGAYQTPAEKRAFLGTLKKDLATTA	4	HGSLAYLPR-AGMTTIVR-	#
20140324-tam-192-2c	60S ribosomal protein L3 [Arthroderma otae CBS 113480]	gi%7c296812079 gi%7c238841633	51772	99	8	2	0.03	MSNGYRPASRMGSDDIIHYIFSRLLTQQKGKNCYQKNFSTCWNFRPTTNTQDTNPPTTGCQGRGHDVHRKYEAPRHGSLAYLPRKRAARHRGKVKSFPKDDPKKPVHLTATMGYKAGMTTIVRDLERPGAKMHRKEVVEAVTIVETPPREQMIAVGIVGYIETPRGLRSLTTVWADHLSDEVKRRFYKNWYKSKKKAFTRYAKTHADAAATTRELERIKNYCTVVRLLAHTQIRKTPLKQKKAHLMEVQVNGGSIAEKVEFAHGLFEKPIDVDTVFEKDEVVDVIAVTKGHGFSGVTSRWGTKKLPRKTHKGLRKVACIGAWHPSHVQWTVARAGQDGYHHRTSANHKIYRIGKAGDEGNASTDFDVSKKQITPMGGFVRYGEVKNDFVMLKGSIPGVR…	4	HGSLAYLPR-AGMTTIVR-	#
20140324-tam-192-2c	60S ribosomal protein L3 [Verticillium alfalfae VaMs.102]	gi%7c302412909 gi%7c261356863	44015	99	8	2	0.04	MSHRKYEAPRHGSLAYLPRKRAARHRGKVKSFPKDDPKKPVHLTATMGYKAGMTTIVRDLDRPGAKAHKKEVVEAVSIIDTPPMVVVGLVGYIETPRGLRSLATVWAEHLSDEVRRRFYRNWYKSKKKAFTKYAKKHSESSGASITREIERIKKYCSVVRVLAHTQIRKTPLKQKKAHLMEIQVNGGSVADKVDFGYGLFEKEVSVDSIFEQDEMIDVIAVTKGKGFNGVTSRWGTKKLPRKTHKGLRKVACIGAWHPSHVQWTVARAGQMGYHHRTSVNHKVYRIAKAGAEDSASTELDVTKKVITPLGGFVRYGEINNDFVMVKGSIPGPKKRVVTLRKSMFVHTSRRSNEKITLKWIDTSSEFGHGAFQTPAEKKQYQGTLKKDLVAA	4	HGSLAYLPR-AGMTTIVR-	#
20140324-tam-192-2c	60S ribosomal protein L3 [Nectria haematococca mpVI 77-13-4]	gi%7c302915465 gi%7c256732482	44049	99	8	2	0.04	MSHRKFEAPRHGSLAYLPRKRAARHRGKVKSFPKDDPKKPVHLTAAMGYKAGMTTIVRDLDRPGAKANKKEIVEAVTIVDTPPMIVVGLVGYIETPRGLRSLTTVWAEHLSDEVKRRFYKNWYKSKKKAFTKYAKKHSENNGASITRELERIKKYCTIVRVLAHTQIRKTPLKQKKAHLMEIQVNGGSVADKVAFGQELFEKPVDISSIFEQDEMIDVIAVTKGHGFNGVTARWGTKKLPRKTHKGLRKVACIGAWHPSHVQWTVARAGQMGYHHRTSVNHKIYRIGKGDAEDNAATEIDVTKKTITPLGGFVRYGEVKNDFVMLKGSIPGVKKRVMTLRKTMFPQTSRRALEKVSLKWIDTSSEFGHGAFQTPAEKKQYQGTLKKDLASA	4	HGSLAYLPR-AGMTTIVR-	#
20140324-tam-192-2c	putative 60s ribosomal protein l3 protein [Togninia minima UCRPA7]	gi%7c500257396	43893	99	8	2	0.04	MSHRKYEAPRHGSLAYLPRKRAARHRGKVKSFPKDDPKKPVHLTAAMGYKAGMTTIVRDLDRPGAKSHKKEVVEAVSIIDTPPMIVVGLVGYIETPRGLRSLTTVWAEHLGDELKRRFYKNWYKSKKKAFTKYAKKHSENKGASITSELERIKKYCTVVRVLAHTQIRKTPLKQKKAHLMEIQINGGSVADKVEFGHGLFEKPVSIDSIFEKDEVIDVIAVTKGHGYAGVTARWGTKKLPRKTHKGLRKVACIGAWHPSHVQWTVARAGQQGYHHRTSVNHKVYRIGKGGAEDNAATELDVTKKTITPLGGFVRYGEVNNDFVMVKGSIPGTKKRIMTLRKSMFTHTSRKALEKVELKWIDTSSEFGHGAFQTPAEKKQYQGTLKKDLVAA	4	HGSLAYLPR-AGMTTIVR-	#
20140324-tam-192-2c	60S ribosomal protein L3 [Fusarium graminearum PH-1]	gi%7c558862281	44053	99	8	2	0.04	MSHRKFEAPRHGSLAYLPRKRAARHRGKVKSFPKDDPKKPVHLTAAMGYKAGMTTIVRDLDRPGAKANKKEIVEAVTIVDTPPMIVVGLVGYIETPRGLRSLTTVWAEHLSDEIKRRFYKNWYKSKKKAFTKYAKKHSENNGASITRELERIKKYCTVVRVLAHTQIRKTPLKQKKAHLMEIQVNGGSIADKVSFGQELFEKPVDVSSIFEQDEMIDVVAVTKGHGFNGVTARWGTKKLPRKTHKGLRKVACIGAWHPSHVQWTVARAGQMGYHHRTSVNHKIYRIGKGDADDNAATEIDVTKKTITPLGGFVRYGEVKNDFVMLKGSIPGVKKRVMTLRKTMFPQTSRRALEKVSLKWIDTSSEFGHGAFQTPAEKKQYQGTLKKDLSSA	4	HGSLAYLPR-AGMTTIVR-	#
20140324-tam-192-2c	Pc16g05080 [Penicillium chrysogenum Wisconsin 54-1255]	gi%7c255940172 gi%7c211585478	48801	110	6	2	0.04	MAAPAQKFKVADLSLAAFGRREIELSEVEMPGLMAIREKYGADQPLKGARIAGCLHMTIQTAVLIETLTHLGAEVTWTSCNIFSTQDHAAAAIAAAGVPVFAWKGESEEEYQWCLDQQLQAFKDGKKLNLILDDGGDLTSLVHTKYPEMLDDCFGVSEETTTGVHHLYKMMKENTLKVPAINVNDCVTKSKFDNLYGCRESLIDGIKRATDVMIAGKVAVVAGYGDVGKGCAQALHSMGARVIVTEVDPINALQAAVQGYEVNTMEAAAPIGQIFVTTTGCRDILVGRHFEAMRNDAIVCNIGHFDIEIDVAWLKANSQSVQNIKPQVDRYSLNGKNIILLAEGRLVNLGCATGHSSFVMSCSFSNQVLAQIALFKAEDEAFGKKYIEFGAGGRKPVGV…	3	ATDVMIAGK-NIILLAEGR-	#
20140324-tam-192-2c	Adenosylhomocysteinase [Penicillium digitatum PHI26]	gi%7c425774431 gi%7c425783613	48883	110	6	2	0.04	MSAPAQKFKVADLSLAAFGRREIELSEVEMPGLMAIREKYGADQPLKGARIAGCLHMTIQTAVLIETLTHLGAEVTWTSCNIFSTQDHAAAAIAAAGVPVFAWKGETEEEYQWCLDQQLQAFKDGKKLNLILDDGGDLTSLIHTKYPEMLEDCFGVSEETTTGVHHLYKMLKDNKLKVPAINVNDCVTKSKFDNLYGCRESLIDGIKRATDVMIAGKVAVVAGYGDVGKGCAQALHSMGARVIVTEVDPINALQAAVQGYEVNTMEAAAPVGQIFVTTTGCRDILVGRHFEAMRNDAIVCNIGHFDIEIDVAWLKANAQSVQNIKPQVDRYNLNGKNIILLAEGRLVNLGCATGHSSFVMSCSFSNQVLAQIALFKAEDEAFGKKYVEFGAGGRKPVGV…	3	ATDVMIAGK-NIILLAEGR-	#
20140324-tam-192-2c	adenosylhomocysteinase [Cladophialophora carrionii CBS 160.54]	gi%7c565937258	49044	110	6	2	0.03	MASNGAPAQKFKVADISLAAFGRREIELAEIEMPGLMAIRTKYAADQPLAGARIAGCLHMTIQTAVLIETLKALGAEVTWSSCNIFSTQDHAAAAIAAGGTPVFAWKGETEEEYEWCLEQQLKAFPSGKSLNLILDDGGDLTALVHNKYPEMLKDCYGVSEETTTGVHHLYRMLKGKSLLIPAVNVNDSVTKSKFDNLYGCRESLVDGIKRATDVMIAGKIAVVAGYGDVGKGCAQALHSMGARVLVTEVDPINALQAAVSGYQVVTMDDAASQGQIFVTTTGCRDIIVGKHFEQMRNDAIVCNIGHFDIEIDVAWLKKNAKSVQNIKPQVDRYTMPSGRNIILLAEGRLVNLGCATGHSSFVMSCSFSNQVLAQIMLFKAEDEAFGKKYIEFGKSGKK…	3	ATDVMIAGK-NIILLAEGR-	#
	Sample 6#
	25.8mg
	Semase seed storage proteins
20140414-tam223-3	11S globulin seed storage protein 2 [Sesamum indicum]	gi%7c75315270 gi%7c5381325	51798	178	36	4	0.07	MVAFKFLLALSLSLLVSAAIAQTREPRLTQGQQCRFQRISGAQPSLRIQSEGGTTELWDERQEQFQCAGIVAMRSTIRPNGLSLPNYHPSPRLVYIERGQGLISIMVPGCAETYQVHRSQRTMERTEASEQQDRGSVRDLHQKVHRLRQGDIVAIPSGAAHWCYNDGSEDLVAVSINDVNHLSNQLDQKFRAFYLAGGVPRSGEQEQQARQTFHNIFRAFDAELLSEAFNVPQETIRRMQSEEEERGLIVMARERMTFVRPDEEEGEQEHRGRQLDNGLEETFCTMKFRTNVESRREADIFSRQAGRVHVVDRNKLPILKYMDLSAEKGNLYSNALVSPDWSMTGHTIVYVTRGDAQVQVVDHNGQALMNDRVNQGEMFVVPQYYTSTARAGNNGFEWV…	9	ISGAQPSLR-LVYIER-AFYLAGGVPR-SPLAGYTSVIR-	#
20140414-tam223-3	11S globulin precursor isoform 4 [Sesamum indicum]	gi%7c81238594	52650	103	14	3	0.05	MAKLFLSLLTFLLLFSLSFALRGSTWQQGQCRISRINAQEPTRRIQAEGGVSEFWDHNSDEFQCAGVSIHRHRLQARALMLPAYHNAPILAYVQQGRGMYGVMISGCPETFESSQQQFEEGRGAQRFRDRHQKIGQFREGDILAFPAGAAHWAYNNGDQELVIVVLQDNANNANQLDPNPRSFFLAGNPAGRGQEQQEYAPQLGRKRGQHQFGNVFRGFDVQILSEVFGVDEQAARSLQGENDERGHIITVARGLQVISPPLQREEYGRQEEEPYYGRRDNGLEETICSAKLRENIDKPSRADIYNPRAGRFSTINSLTLPILSFLQLSAARGVLYRNGIMAPHWCVNAHSVIYVTRGESDMQIVSHNGQAVFDGRVREGQVVVVPQNFAVVKRAGEQG…	4.66667	INAQEPTR-ADIYNPR-ETMMFSGSFR-	#
	Collagen
20140414-tam223-3	Collagen alpha-2(I) chain [Bos mutus]	gi%7c440893297	129179	188	30	5	0.04	MLSFVDTRTLLLLAVTSCLATCQCKCLQLVSGSLGKSGDRGPRGERGPPGPPGRDGDDGIPGPPGPPGPPGPPGLGGNFAAQFDAKGGGPGPMGLMGPRGPPGASGAPGPQGFQGPPGEPGEPGQTGPAGARGPPGPPGKAGEDGHPGKPGRPGERGVVGPQGARGFPGTPGLPGFKGIRGHNGLDGLKGQPGAPGVKGEPGAPGENGTPGQTGARGLPGERGRVGAPGPAGARGSDGSVGPVGPAGPIGSAGPPGFPGAPGPKGELGPVGNPGPAGPAGPRGEVGLPGLSGPVGPPGNPGANGLPGAKGAAGLPGVAGAPGLPGPRGIPGPVGASGATGARGLVGEPGPAGSKGESGNKGEPGAVGQPGPPGPSGEEGKRGSTGEIGPAGPPGPPGLR…	6	GVVGPQGAR-GIPGPVGASGATGAR-AGVMGPAGSR-GPSGPQGIR-IGQPGAVGPAGIR-	#
	Mold
20140414-tam223-3	ADP/ATP carrier protein [Byssochlamys spectabilis No. 5]	gi%7c557723494	34277	276	22	6	0.2	MAKGEVNQAEKSVFGMPGFVVDFLMGGVSAAVSKTAAAPIERIKLLIQNQDEMLKAGRLDRKYDGIVDCFRRTAASEGVVSLWRGNTANVIRYFPTQALNFAFRDTYKSMFAFKKDRDGYWKWMAGNLASGGAAGATSLLFVYSLDYARTRLANDAKSAKGGGDRQFNGLVDVYKKTLASDGIAGLYRGFGPSVLGIVVYRGLYFGMYDSIKPVLLVGPLEGSFLASFLLGWTVTTGAGIASYPLDTIRRRMMMTSGEAVKYSSSLDAARQIAAKEGVKSFFKGAGANILRGVAGAGVLSIYDQVQLLLFGKKFKGGSG	3.66667	TAAAPIER-TAASEGVVSLWR-YFPTQALNFAFR-TLASDGIAGLYR-GFGPSVLGIVVYR-GAGANILR-	#
20140414-tam223-3	ATP synthase beta chain_ mitochondrial precursor [Ajellomyces capsulatus NAm1]	gi%7c154276988 gi%7c150414412	56005	240	30	5	0.11	MFKSGVARTFARSAVLARPATSLPTSRLAQPFKNTALRALAARYASTNTAQSGKIHQVIGAVVDVKFDGDQLPSILNALETTNGGQKLVLEVAQHLGENVVRTIAMDGTEGLVRGAPVTDTGAPIMIPVGPGTLGRIMNVTGDPIDERGPIKHTMKAPIHAEAPEYVEQATSAEVLVTGIKVVDLLAPYARGGKIGLFGGAGVGKTVFIQELINNIAKAHGGYSVFTGVGERTREGNDLYHEMQETRVIQLDGESKVALVFGQMNEPPGARARVALTGLTVAEYFRDEEGQDVLLFIDNIFRFTQAGSEVSALLGRIPSAVGYQPTLAVDMGGMQERITTTTKGSITSVQAVYVPADDLTDPAPATTFAHLDATTVLSRGISELGIYPAVDPLDSKSRM…	6	TIAMDGTEGLVR-VVDLLAPYAR-IGLFGGAGVGK-VALTGLTVAEYFR-FTQAGSEVSALLGR-	#
20140414-tam223-3	F1-ATPase beta subunit Atp2 [Schizosaccharomyces pombe 972h-]	gi%7c19114063 gi%7c114565 gi%7c6433997	56841	240	30	5	0.11	MLKKQALSGIRRFSLATKQSFVKTSYKLPRKSWLNTAKFNTIRYASTEAAKHNKGSIKQVIGAVVDCQFEDADSLPSILNALEVKLPDNKRLVLEVAQHVGENTVRTIAMDGTEGLVRGTAVIDTGSPISIPVGPGTLGRIMNVIGEPVDERGPIKAVKYSPIHADAPSFEEQSTTPEILETGIKVVDLLAPYARGGKIGLFGGAGVGKTVFIQELINNIAKAHGGYSVFTGVGERTREGNDLYREMQETGVIKLEGESKAALVFGQMNEPPGARARVALTGLTVAEYFRDIEGQDVLLFIDNIFRFTQAGSEVSALLGRIPSAVGYQPTLATDMGAMQERITTTKKGSITSVQAVYVPADDLTDPAPATTFAHLDATTVLSRSISELGIYPAVDPLDS…	6	TIAMDGTEGLVR-VVDLLAPYAR-IGLFGGAGVGK-VALTGLTVAEYFR-FTQAGSEVSALLGR-	#
20140414-tam223-3	ATP synthase subunit beta [Schizosaccharomyces japonicus yFS275]	gi%7c213406065 gi%7c212001851	55997	240	30	5	0.11	MFRRHVLSSFRQLTGLNGVLHSVKRVGLRSVVPQLARFASTESLKKAGTIKQVIGAVVDCQFDDAQALPTILNALETKLPDGRRLVLEVAQHMGENTVRTIAMDGTEGLVRGSKVIDTGAPIAVPVGPGTLGRIMNVIGEPIDERGPIKAAKYSPIHAEAPSFEEQSTSPEILETGIKVVDLLAPYARGGKIGLFGGAGVGKTVFIQELINNIAKAHGGYSVFTGVGERTREGNDLYREMQETGVIKLDGESKAALVFGQMNEPPGARARVALTGLTVAEYFRDVEGQDVLLFIDNIFRFTQAGSEVSALLGRIPSAVGYQPTLATDMGAMQERITTTKKGSITSVQAVYVPADDLTDPAPATTFAHLDATTVLSRSISEMGIYPAVDPLDSKSRMMDP…	6	TIAMDGTEGLVR-VVDLLAPYAR-IGLFGGAGVGK-VALTGLTVAEYFR-FTQAGSEVSALLGR-	#
20140414-tam223-3	ATP synthase subunit beta [Ajellomyces capsulatus G186AR]	gi%7c225554645 gi%7c240276989 gi%7c325094927	55968	240	30	5	0.11	MFKSGVARTFARSAAFARPSTSLPTSRLAQPFKNTALRALAARYASTSTAQSGKIHQVIGAVVDVKFDGDQLPSILNALETTNGGQKLVLEVAQHLGENVVRTIAMDGTEGLVRGAAVTDTGAPIMIPVGPGTLGRIMNVTGDPIDERGPIKHTKKAPIHAEAPEYVEQATSAEVLVTGIKVVDLLAPYARGGKIGLFGGAGVGKTVFIQELINNIAKAHGGYSVFTGVGERTREGNDLYHEMQETRVIQLDGESKVALVFGQMNEPPGARARVALTGLTVAEYFRDEEGQDVLLFIDNIFRFTQAGSEVSALLGRIPSAVGYQPTLAVDMGGMQERITTTTKGSITSVQAVYVPADDLTDPAPATTFAHLDATTVLSRGISELGIYPAVDPLDSKSRM…	6	TIAMDGTEGLVR-VVDLLAPYAR-IGLFGGAGVGK-VALTGLTVAEYFR-FTQAGSEVSALLGR-	#
20140414-tam223-3	hypothetical protein AOL_s00054g354 [Arthrobotrys oligospora ATCC 24927]	gi%7c345568390	55247	240	30	5	0.11	MLKNGFTRLASRATLRSSLRPTIRSSAAPLISARFQSSDAPLTGKIHQVIGAVVDVKFDSDRLPPILNAIHTDNNGQRLVLEVAQHLGENVVRTIAMDGTEGLVRGAECKDSGNPIMIPVGPGTLGRIMNVTGDPIDERGPIKATKYLPIHAEAPSFVEQSTSAEILVTGIKVVDLLAPYARGGKIGLFGGAGVGKTVFIQELINNIAKAHGGYSVFTGVGERTREGNDLYHEMQETQVIQLDGESKVALVFGQMNEPPGARARVALTGLTVAEYFRDDEGQDVLLFVDNIFRFTQAGSEVSALLGRIPSAVGYQPTLATDMGLLQERITTTKKGSITSVQAVYVPADDLTDPAPATTFAHLDATTVLSRGISELGIYPAVDPLDSKSRLMDPRVIGED…	6	TIAMDGTEGLVR-VVDLLAPYAR-IGLFGGAGVGK-VALTGLTVAEYFR-FTQAGSEVSALLGR-	#
20140414-tam223-3	putative ATP synthase subunit beta_ mitochondrial [Glarea lozoyensis 74030]	gi%7c361128644 gi%7c512198269	54785	240	30	5	0.11	MFRSALQKSAFKASRSAFRPAVSAGLRVAGARFASDNALHGKIHQVIGAVVDVKFDTDKLPPILNALETDNGGTKLVLEVAQHLGENVVRTIAMDGTEGLVRGHRATDTGNPIMVPVGPGTLGRIMNVTGDPIDERGPIKHTKKLPIHADAPPFTDQSTAAEVLVTGIKVVDLLAPYARGGKIGLFGGAGVGKTVFIQELINNIAKAHGGYSVFTGVGERTREGNDLYHEMQETQVIQLDGESKVALVFGQMNEPPGARARVALTGLTVAEYFRDEEGQDVLLFIDNIFRFTQAGSEVSALLGRIPSAVGYQPTLAVDMGLMQERITTTNKGSITSVQAVYVPADDLTDPAPATTFAHLDATTVLSRGISELGIYPAVDPLDSKSRMLDPRIIGQDHYD…	6	TIAMDGTEGLVR-VVDLLAPYAR-IGLFGGAGVGK-VALTGLTVAEYFR-FTQAGSEVSALLGR-	#
20140414-tam223-3	ATP synthase beta subunit_ partial [Stylochus sp. KJP-2004]	gi%7c46909255	46106	240	30	5	0.14	DLPPILNALEVENRSPRLVLEVAQHLGESSVRTIAMDGTEGLVRGQKCVDVGSPIKIPVGPETLGRIINVIGEPIDERGPINAKMLSSIHADAPDFEDMSTEQEILETGIKVVDLLAPYARGGKIGLFGGAGVGKTVLIMELINNIARAHGGYSVFAGVGERTREGNDLYHEMIQTGVVDLKGNNSKVALVYGQMNEPPGARARVALTGLTVAEYFRDEEGQDVLLFIDNIFRFTQAGSEVSALLGRIPSAVGYQPTLATDMGTMQERITTTKKGSITSVQAIYVPADDLTDPAPATTFAHLDATTVLSRGIAELGIYPAVDPLDSMSRILDPNIVGTEHYTVAKGVQKILQDYRSLQDIIAILGMDELSEDDRLTVARARKISRFLSQPFQMAEVFTG…	6	TIAMDGTEGLVR-VVDLLAPYAR-IGLFGGAGVGK-VALTGLTVAEYFR-FTQAGSEVSALLGR-	#
20140414-tam223-3	ATP synthase F1_ beta subunit [Pneumocystis murina B123]	gi%7c470319195	57801	240	30	5	0.11	MFFARKIRPFFHRRFLALRIKNENIRQLIQLKAQKIECLSFLNARFITTDTTAQNLPVGRVKAVIGAVVDVQFDTEELPKVLDALHLDLPDGKRLVLEVSQHLGERTVRTIAMDGTEGLVRGQKAKATGGPIKVPVGPGTLGRIMNVIGEPIDERGPIKAVKYNPIHTEPPTFSDQETTPSLLVTGIKVVDLLAPYARGGKIGLFGGAGVGKTVFIQELINNIAKAYGGYSVFVGVGERTREGNDLYHEMIQTGVIKLDGESKAALVFGQMNEPPGARARVALTGLTVAEYFRDEEGQDVLLFVDNIFRFTQAGSEVSALLGRIPSAVGYQPTLSTDMGGMQERITTTKKGSITSIQAVYVPADDLTDPAPATTFAHLDATTTLSRSISELGIYPAVDP…	6	TIAMDGTEGLVR-VVDLLAPYAR-IGLFGGAGVGK-VALTGLTVAEYFR-FTQAGSEVSALLGR-	#
20140414-tam223-3	hypothetical protein H072_9367 [Dactylellina haptotyla CBS 200.50]	gi%7c526195412	131146	240	30	5	0.05	MTPPATTPIESPDVSDGTGVIKLDPWLSPYKEQLRHRFSKTQEWIRNLEHTEGGLEKFSRGYERFGFNILKNGEIVYREWAPNATAATLVVGGDNNHWDLGQYPMKKDAFGVWEVTIPPNDGNPSISHNAKVKIVMRLPSGEDIHRLPAWIKRVTQDLSVSPIYDARFWNPPTKYVFQNPKPKKPTSARVYEAHIGISTSEPKVGTYKEFTLNVLPRIKKLGYNVLQLMAIMEHAYYASFGYQITSFFAASSRYGEPEDLKELIDTAHGMGITVLLDVVHSHACNNVLDGLNMFDGTDHLYFHGGAKGRHELWDSRLFNYGNHEVLRFLLSNLRFYMEEYQFDGFRFDGVTSILYTHHGIGTGFSGGYHEYFGPSVDEEGVVYLMLANEMLHTVYNDVI…	6	TIAMDGTEGLVR-VVDLLAPYAR-IGLFGGAGVGK-VALTGLTVAEYFR-FTQAGSEVSALLGR-	#
20140414-tam223-3	F1-ATPase beta subunit Atp2 [Schizosaccharomyces cryophilus OY26]	gi%7c528316185	56404	240	30	5	0.11	MLKKQALSGLRQFSLATKSPFVTNRLQNSKKSWLNAAKFASLRCASTEAARKNKGTIKQVIGAVVDCHFENSESLPSILTALEVNMADKRVVLEVAQHVGENTVRTIAMDGTEGLVRGTDVIDTGAPISVPVGPGTLGRIMNVIGEPVDERGPIDAVKYSPIHADAPSFADQSTTPEVLETGIKVVDLLAPYARGGKIGLFGGAGVGKTVFIQELINNIAKAHGGYSVFCGVGERTREGNDLYHEMQETGVIKLGGDSKAALVFGQMNEPPGARARVALTGLTVAEYFRDVEGQDVLFFIDNIFRFTQAGSEVSALLGRIPSAVGYQPTLSTDMGAMQERITTTKKGSITSVQAVYVPADDLTDPAPATTFAHLDATTVLSRGISELGIYPAVDPLDSK…	6	TIAMDGTEGLVR-VVDLLAPYAR-IGLFGGAGVGK-VALTGLTVAEYFR-FTQAGSEVSALLGR-	#
20140414-tam223-3	ATP synthase F1_ beta subunit_ putative [Byssochlamys spectabilis No. 5]	gi%7c557723241	56022	240	30	5	0.11	MFKSGLARTFGRAAYSRPAPVPRRAFEPLRSNALPALSARLASTDASSIGKIHQVIGAVVDVKFDSEKLPPILNALETQNNGQKLVLEVAQHLGENVVRTIAMDGTEGLVRGAHCNDTGAPIKIPVGPATLGRIMNVTGDPIDERGPIKATKFAPIHAEPPEYVEQSTEAEILVTGIKVVDLLAPYARGGKIGLFGGAGVGKTVFIQELINNIAKAHGGYSVFTGVGERTREGNDLYHEMQETRVIQLDGESKVALVFGQMNEPPGARARVALTGLTVAEYFRDEEGQDVLLFIDNIFRFTQAGSEVSALLGRIPSAVGYQPTLAVDMGVMQERITTTKKGSITSVQAVYVPADDLTDPAPATTFAHLDATTVLSRGISELGIYPAVDPLDSKSRMLDP…	6	TIAMDGTEGLVR-VVDLLAPYAR-IGLFGGAGVGK-VALTGLTVAEYFR-FTQAGSEVSALLGR-	#
20140414-tam223-3	elongation factor 1-alpha [Aspergillus terreus NIH2624]	gi%7c115389366 gi%7c114194584	49759	105	14	3	0.05	MTRGLSSLLNSKDEKTHINIVVIGHVDSGKSTTTGHLIYKCGGIDSRTIEKFEKEAAELGKGSFKYAWVLDKLKSERERGITIDIALWKFQTAKYEVTVIDAPGHRDFIKNMITGTSQADCAILIIASGTGEFEAGISKDGQTREHALLAFTLGVRQLIVALNKMDTCKWSEDRYNEIVKETSNFIKKVGYNPKAVPFVPISGFNGDNMLEPSPNCPWYKGWEKEGKSGKVTGKTLLEAIDAIEPPVRPANKPLRLPLQDVYKISGIGTVPVGRVETGVITPGMVVTFAPSNVTTEVKSVEMHHQQLKEGLPGDNVGFNVKNVSVKEVRRGNVAGDSKNDPPAGAASFTAQVIVLNHPGQVGAGYAPVLDCHTAHIACKFAELQEKIDRRTGKSVESSP…	4.66667	LPLQDVYK-ISGIGTVPVGR-SGDAAIVK-	#
20140414-tam223-3	hypothetical protein CIMG_03708 [Coccidioides immitis RS]	gi%7c119187321 gi%7c115502383 gi%7c392870985	50139	105	14	3	0.05	MGKEEKTHINLVVIGHVDSGKSTTTGHLIYKCGGIDNRTIEKFEKEAEELGKKSFKYAWVLDKLKAERERGITIDIALWKFETPKYHVTVIDAPGHRDFIKNMITGTSQADCAILIIAAGTGEFEAGISKDGQTREHALLAFTLGVKQLIVAINKMDSTNWSEPRFNEIVKEVSNFIKKVGYNPKAVPFVPISGFEGDNMIQPSTNAPWYKGWNKETASGKHSGKTLLDAIDAIDPPTRPTEKPLRLPLQDVYKISGIGTVPVGRVETGVIKPGMVVTFAPSNVTTEVKSVEMHHQQLTQGNPGDNVGFNVKNVSVKEVRRGNVAGDSKNDPPKGCDSFNAQVIVLNHPGQVGAGYAPVLDCHTAHIACKFSELLEKIDRRTGKSVENNPKFIKSGDAA…	4.66667	LPLQDVYK-ISGIGTVPVGR-SGDAAIVK-	#
20140414-tam223-3	translation elongation factor EF-1 alpha subunit _ putative [Neosartorya fischeri NRRL 181]	gi%7c119496509 gi%7c119413190	50002	105	14	3	0.05	MGKEEKTHINIVVIGHVDSGKSTTTGHMIYKCGGIDQRTIEKFEKEAAELGKGSFKYAWVLDKLKSERERGITIDIALWKFQTPKYEVTVIDAPGHRDFIKNMITGTSQADCAILIIASGTGEFEAGISKDGQTREHALLAFTLGVKQLIVALNKMDTCKWSEDRYNEIVKETSNFIKKVGYNPKAVPFVPISGFNGDNMLEPSTNCPWYKGWEKETKAGKVTGKTLIEAIDAIEPPVRPSNKPLRLPLQDVYKISGIGTVPVGRVETGVIKPGMVVTFAPANVTTEVKSVEMHHQQLQEGVPGDNVGFNVKNVSVKEVRRGNVCGDSKNDPPQGAASFNAQVIVLNHPGQVGAGYAPVLDCHTAHIACKFAELLEKIDRRTGKSVENNPKFIKSGDAA…	4.66667	LPLQDVYK-ISGIGTVPVGR-SGDAAIVK-	#
20140414-tam223-3	translation elongation factor 1-alpha [Ajellomyces capsulatus NAm1]	gi%7c154271245 gi%7c150409699	50166	105	14	3	0.05	MGKEDKTHINLVVIGHVDSGKSTTTGHLIYKCGGIDSRTIEKFEKEAEELGKKSFKYAWVLDKLKSERERGITIDIALWKFETPKYSVTVIDAPGHRDFIKNMITGTSQADCAILIIAAGTGEFEAGISKDGQTREHALLAFTLGVRQLIVAINKMDTTKWSESRFNEIIKEVSNFIKKVGYNPKAVPFVPISGFEGDNMIEPSPNCAWYKGWNKETASGKSSGKTLLDAIDAIEPPTRPTDKPLRLPLQDVYKISGIGTVPVGRVETGVIKPGMVVTFAPSNVTTEVKSVEMHHQQLQAGYPGDNVGFNVKNVSVKEVRRGNVAGDSKNDPPKGCESFNAQVIVLNHPGQVGAGYAPVLDCHTAHIACKFSELIEKIDRRTGKSVENNPKFIKSGDAA…	4.66667	LPLQDVYK-ISGIGTVPVGR-SGDAAIVK-	#
20140414-tam223-3	translation elongation factor 1 alpha [Glyphium elatum]	gi%7c213990294	33194	105	14	3	0.08	APILIIAAGTGEFEAGISKDGQTREHALLAYTLGVKQLIVAINKMDTTKWSEDRFNEIIKETSSFIKKVGYNPKTVPFVPISGFNGDNMIDNSSNCPWYKGWEKESKAGKSNGKTLLEAIDAIEPPSRPTDKALRLPLQDVYKISGIGTVPVGRVETGIIKSGMVVTFAPANVTTEVKSVEMHHEQLTEGLPGDNVGFNVKNVSVKEVRRGNVCGDSKNDPPRGCDSFNAQVIVLNHPGQVGAGYAPVLDCHTAHIACKFSELLEKIDRRTGKSVEASPKFIKSGDAAIVKMVPSKPMCVEAFTDYP	4.66667	LPLQDVYK-ISGIGTVPVGR-SGDAAIVK-	#
20140414-tam223-3	elongation factor 1-alpha [Paracoccidioides brasiliensis Pb03]	gi%7c225681738	28041	105	14	3	0.1	MIEPSANCPWYKGWSKETAQGKYSGKTLLEAIDAIEPPTRPTDKPLRLPLQDVYKISGIGTVPVGRVETGVIKPGMVVTFAPANVTTEVKSVEMHHQQLTAGNPGDNVGFNVKNVSVKEVRRGNVAGDSKNDPPKGCDSFNAQVIVLNHPGQVGAGYAPVLDCHTAHIACKFAELLEKIDRRTGKSVENNPKFIKSGDAAIVKMIPSKPMCVEAFTEYPPLGRFAVRDMRRTVAVGVIKSVVKSDKAGGKVTKAAQKATKK	4.66667	LPLQDVYK-ISGIGTVPVGR-SGDAAIVK-	#
20140414-tam223-3	elongation factor 1-alpha [Exophiala dermatitidis NIH/UT8656]	gi%7c378728030	49920	105	14	3	0.05	MGKEKTHINVVVIGHVDSGKSTTTGHLIYKCGGIDKRTIEKFEKEAAELGKGSFKYAWVLDKLKAERERGITIDIALWKFETPKYYVTVIDAPGHRDFIKNMITGTSQADCAILIIAAGTGEFEAGISKDGQTREHALLAYTLGVKQLIVAINKMDTTKWSEERFNEIIKETSNFIKKVGYNPKAVPFVPISGFNGDNMIEVSTNCPWYKGWEKESKAGKATGKTLLEAIDAIDPPTRPTDKPLRLPLQDVYKISGIGTVPVGRVETGTIKAGMVVTFAPANVTTEVKSVEMHHEQLAEGLPGDNVGFNVKNVSVKEVRRGNVAGDSKNDPPKGAESFNAQVIVLNHPGQIGAGYAPVLDCHTAHIACKFAELLEKIDRRTGKSIENNPKFIKSGDAAI…	4.66667	LPLQDVYK-ISGIGTVPVGR-SGDAAIVK-	#
20140414-tam223-3	Elongation factor 1-alpha [Penicillium digitatum Pd1]	gi%7c425769917 gi%7c425771439	49769	105	14	3	0.05	MGKEERSHINIVVIGHVDSGKSTTTGHMIYKCGGIDQRTIEKFEKEAAELGKGSFKYAWVLDKLKAERERGITIDIALWKFQTAKYEVTVIDAPGHRDFIKNMITGTSQADCAILIIASGTGEFEAGISKDGQTREHALLAFTLGVKQLIVALNKMDTCKWSEDRYNEIVKETSNFIKKVGYNPKSVPFVPISGFNGDNMLEPSPNCPWYKGWEKETKAGKTSGKTLLEAIDAIETPVRPSNKPLRLPLQDVYKISGIGTVPVGRVETGVISPGMIVTFAPANVTTEVKSVEMHHQQLKAGNPGDNVGFNVKNVSVKEVRRGNVASDSKNDPAAACDSFNAQVIVLNHPGQVGAGYAPVLDCHTAHIACKFAELLEKIDRRTGKATETSPKFIKSGDAA…	4.66667	LPLQDVYK-ISGIGTVPVGR-SGDAAIVK-	#
20140414-tam223-3	elongation factor 1-alpha [Byssochlamys spectabilis No. 5]	gi%7c557724787	49958	105	14	3	0.05	MGKEEKSHINIVVIGHVDSGKSTTTGHLIYKCGGIDQRTIEKFEKEATELGKGSFKYAWVLDKLKAERERGITIDIALWKFQTSKYEVTVIDAPGHRDFIKNMITGTSQADCAILIIASGTGEFEAGISKDGQTREHALLAFTLGVRQLIVALNKMDTAKWSQDRYNEIVKETSNFIKKVGYNPKGVPFVPISGFHGDNMLEPSPNCPWYKGWEKETKAGKVTGKTLLEAIDAIEPPVRPSNKPLRLPLQDVYKISGIGTVPVGRVETGIIAPGMVVTFAPSNVTTEVKSVEMHHQQLKEGVPGDNVGFNVKNVSVKEVRRGNVAGDSKNDPPMGAASFNAQVIVLNHPGQISAGYAPVLDCHTAHIACKFSELLEKIDRRTGKSVEDHPKFIKSGDAA…	4.66667	LPLQDVYK-ISGIGTVPVGR-SGDAAIVK-	#
20140414-tam223-3	plasma membrane H+ATPase Pma1 [Aspergillus clavatus NRRL 1]	gi%7c121705040 gi%7c119398929	108692	68	9	2	0.02	MAERRISYAPDVENGDHSRHAENDGNLDEYSALNRYISTARDGRRGSTSSAGARSVQEKKKSGFAFWKKNTEEDGAFVCPDEWLDTDMRTGLASSEIEHRRKKGGWNELTTEKTNFFVQFIGYFRGPILYVMELAVLLAAGLRDWIDLGVIIGILMLNAVVGWYQEKQAADVVASLKGDIAMKAIVIRDGQEQEILARELVTGDIIVIEEGTVVPADIRLICDYDKPEMFETYKEYLATANDDTLKEKDDEDDEDGGIEARVGVSLVAVDQSAITGESLAVDKYMADTCYYTTGCKRGKAYAVVTATARQSFVGKTAALVQGAKDQGHFKAVMDNIGTTLLVLVMFWILAAWIGGFYRHLKIATPEDEDNNLLHYTLILLIIGVPVGLPVVTTTTLAVG…	4.5	DGQEQEILAR-AYAVVTATAR-	#
	Sample 7#
	11.7mg
	animal proteins
tam504_all	Hemoglobin subunit beta-C(NA) [multiple ruminants]	gi%7c122549 gi%7c229272	15623	153	80	3	0.14	PBKALITGFWSKVKVBZVGAZALGRLLVVYPWTZRFFZHFGBLSSABAVMBBAKVKAHGKKVLBSFSBGLKHLBBLKGAFASLSZLHCBKLHVBPZBFRLLGBVLVVVLARHFGKZFBPZLZAZFZKVVAGVASALAHRYH	26.6667	VDEVGAEALGR-LLVVYPWTQR-LLVVYPWTER-	#
tam504_all	albumin precursor [Capra hircus][Ovis aries]	gi%7c193085052 gi%7c57164373 gi%7c113582 gi%7c1387	66270	116	4	3	0.04	DTHKSEIAHRFNDLGEENFQGLVLIAFSQYLQQCPFDEHVKLVKELTEFAKTCVADESHAGCDKSLHTLFGDELCKVATLRETYGDMADCCEKQEPERNECFLKHKDDSPDLPKLKPEPDTLCAEFKADEKKFWGKYLYEVARRHPYFYAPELLYYANKYNGVFQECCQAEDKGACLLPKIETMREKVLASSARQRLRCASIQKFGERALKAWSVARLSQKFPKADFTDVTKIVTDLTKVHKECCHGDLLECADDRADLAKYICDHQDTLSSKLKECCDKPVLEKSHCIAEIDKDAVPENLPPLTADFAEDKEVCKNYQEAKDVFLGSFLYEYSRRHPEYAVSVLLRLAKEYEATLEDCCAKEDPHACYATVFDKLKHLVDEPQNLIKKNCELFEKHGE…	1.33333	DVFLGSFLYEYSR-KAPQVSTPTLVEISR-APQVSTPTLVEISR-	#
tam504_all	Hemoglobin alpha [Ovis aries][Ammotragus lervia]	gi%7c1791 gi%7c198385312	15169	66	9	2		MVLSAADKSNVKAAWGKVGGNAGAYGAEALERMFLSFPTTKTYFPHFDLSHGSAQVKGHGEKVAAALTKAVGHLDDLPGTLSDLSDLHAHKLRVDPVNFKLLSHTLLVTLACHLPNDFTPAVHASLDKFLANVSTVLTSKYR	4.5	MFLSFPTTK-VGGNAGAYGAEALE	#
tam504_all	prolyl 3-hydroxylase 3 precursor_ partial [Camelus ferus]*	gi%7c528767242	94822	67	13	2	0.02	VVSFFSLKSDSAPPWMVLAVLWCSMAQTLLLPSFIWSCERYRADVRTVWEQCVAIMSEEDGDDDGGCDDYADGRVCKVRFDANGATGPGARDPTQVKLLPGRHMLFPPLERVHYLQVPLSRRLSHDETNIFSNPRAPGSFLHKWSSSDDIRVLPAQSRALGGPPEYLGQRQRPEDEEEEEKAEGGGLASLRQFLEGGALGSAGGPPRGPGFFREEITTFIDETPLPSPAASPGPSPRRPRPLGLSPRRLSLGSPDSRAIGLPLGLSAGRRCSLTGEDLLDSEEGAWLKKLDLAAAAAHTFFVANPTHLQMREDMAKYRRMTGVRPQSFRDLETPPYWAAYDTGLELLGRQEAGLALPWLEEALQESLAQMESCRADCEGPEEQQREEDEQEGTGSQGGL…	6.5	FDANGATGPGAR-LSLGSPDSR-	#
	non-oilseed plant proteins
tam504_all	zein-alpha PMS1-like [Setaria italica]*	gi%7c514809768	26410	181	82	3	0.26	MVAKICTLLVLLALSASAATAVLIPQCSAAIPQYLPHVTALGYGNPIVQSCRLQQALAASILSSPAVFLQQQSALLQQQYLAHLTLQSIMAQQHQVLSPFSRLSLASPAAYWQHQQLLPFNQLAVENAYLQQQQLLPLNPLAVGNPAAFWQQQQLLRVNPFSAMNPAAFWQQQQLLRVNPVAAMNPATFWQQQQLLRINPLAAMNPTALWQQQQLLRINPLATMNPAAFLQQPIIGSGLF	27.3333	VNPFSAMNPAAFWQQQQLLR-INPLAAMNPTALWQQQQLLR-INPLATMNPAAFLQQPIIGSGLF-	#
	Mold
tam504_all	hypothetical protein ASPNIDRAFT_211159 [Aspergillus niger ATCC 1015]	gi%7c350639504	55589	617	197	12	0.3	MFKSGLARTFGRAAFARPTSVARRAFQPKTNGLPSLARMASTEASSVGKIHQVIGAVVDVKFDGDKLPAILNAIETENGGQKLVLEVSQHLGENVVRTIAMDGTEGLTRGAAARDTGAPITIPVGPGTLGRILNVTGDPIDERGPVKADKFRPIHTEAPEFVEQSTEAEILVTGIKVVDLLAPYARGGKIGLFGGAGVGKTVFIQELINNIAKAHGGYSVFCGVGERTREGNDLYHEMQETGVIQLEGDSKVALVFGQMNEPPGARARVALTGLTIAEYFRDEEGQDVLLFIDNIFRFTQAGSEVSALLGRIPSAVGYQPTLAVDMGGMQERITTTTKGSITSVQAVYVPADDLTDPAPATTFAHLDATTVLSRGISELGIYPAVDPLDSKSRMLDTRI…	16.4167	TIAMDGTEGLTR-DTGAPITIPVGPGTLGR-ILNVTGDPIDER-VVDLLAPYAR-IGLFGGAGVGK-TVFIQELINNIAK-VALVFGQMNEPPGAR-FTQAGSEVSALLGR-GISELGIYPAVDPLDSK-IVGEDHYNTATR-VQQMLQEYK-FLSQPFTVAQVFTGIEGK-	#
tam504_all	mycelial catalase Cat1 [Neosartorya fischeri NRRL 181]	gi%7c119474019 gi%7c119407038	79848	344	174	7	0.11	MRLTFIPGLIGVANAVCPYMTGELNRRDEVSDGDAAAATEEFLSQYYLSDNDTFMTSDVGGPIEDQNSLSAGERGPTLLEDFIFRQKIQRFDHERVPERAVHARGAGAHGVFTSYGDFSNITAASFLAKEGKQTPVFVRFSTVAGSRGSSDLARDVHGFATRFYTDEGNFDIVGNNIPVFFIQDAILFPDLIHAVKPRGDNEIPQAASAHDSAWDFFSQQPSTMHTLLWAMSGHGIPRSFRHVDGFGVHTFRFVTDDGASKLVKFHWKSLQGKASMVWEEAQQTSGKNPDFMRQDLHDAIEAGRYPEWEFGVQIMDEEDQLRFGFDLLDPTKIVPEEFVPITKLGKMQLNRNPRNYFAETEQVMFQPGHIVRGVDFTEDPLLQGRLFSYLDTQLNRHGG…	24.8571	GPTLLEDFIFR-FGFDLLDPTK-NYFAETEQVMFQPGHIVR-GVDFTEDPLLQGR-LFSYLDTQLNR-HGGPNFEQLPINQPR-NNVIIQLNR-	#
tam504_all	catalase [Aspergillus fumigatus]	gi%7c1857716	79867	344	174	7	0.11	MRLTFIPSLIGVANAVCPYMTGELNRRDEISDGDRAAATEEFLSQYYLNDNDAFMTSDVGGPIEDQNSLSAGERGPTLLEDFIFRQKIQRFDHERVPERAVHARGAGAHGVFTSYGDFSNITAASFLAKEGKQTPVFVRFSTVAGSRGSSDLARDVHGFATRFYTDEGNFDIVGNNIPVFFIQDAILFPDLIHAVKPRGDNEIPQAATAHDSAWDFFSQQPSTMHTLLWAMSGHGIPRSFRHVDGFGVHTFRFVTDDGASKLVKFHWKSLQGKASMVWEEAQQTSGKNPDFMRQDLHDAIEAGRYPERELGVQIMDEEDQLRFGFDLLDPTKIVPEEFVPITKLGKMQLNRNPRNYFAETEQVMFQPGHIVRGVDFTEDPLLQGRLFSYLDTQLNRHGG…	24.8571	GPTLLEDFIFR-FGFDLLDPTK-NYFAETEQVMFQPGHIVR-GVDFTEDPLLQGR-LFSYLDTQLNR-HGGPNFEQLPINQPR-NNVIIQLNR-	#
tam504_all	stomatin family protein [Aspergillus clavatus NRRL 1]	gi%7c121706122 gi%7c119399470	37630	188	91	5	0.14	MSTEAIIPNGKAPAQEHEVTSSHRHGPVSVQPARLADLQPRYAQQIQHDADNPEAHGWYASMIHGLGECIGFFGAIPCCICCPNPFKPVDQGEVGLVSKFGRFERAVDPGLVKVNPLSEHLTTIDVKIQIVEVPRQVCMTKDNVTLNLTSVIYYQIISPHKAAFGISNVRQALVERTQTTLRHVIGARVLQDVIERREEIAQSTAEIIEEVASGWGVQVESMLIKDIIFSNDLQDSLSMAAQSKRIGESKVIAARAEVESAKLMRQAADILSSAPAMQIRYLEAMQAMAKTANSKVIFLPAMNQTVQQQLAAADNAGEGPSRYSGATQADDGFQRAMNARVVEDI	18.2	AVDPGLVK-IQIVEVPR-VLQDVIER-QAADILSSAPAMQIR-YLEAMQAMAK-	#
tam504_all	stomatin family protein [Aspergillus oryzae RIB40]	gi%7c169763682 gi%7c83770769 gi%7c391870146	37224	188	91	5	0.14	MSAEDSVVNGKAPAQPGSHHDRGHSGLVSVQPARLADLQPKYAQKLEHDAENPEAHGWYAGLIHSLGECIGFLGAIPCCVCCPNPYKPVAQGEVGLVSKFGRFERAVDPGLVKVNPLSEHLTAVDVKIQIVEVPRQVCMTKDNVTLNLTSVIYYQIVSPHKAAFGISNVRQALVERTQTTLRHVIGARVLQDVIERREEIAQSTSEIIEDVAAGWGVQVESMLIKDIIFSDDLQDSLSMAAQSKRIGESKVIAARAEVESAKLMRQAADILSSAPAMQIRYLEAMQAMAKTANSKVIFLPAMNQTVQQQLAAADNAGEGPSRYGTGNVDDGFQRAMNARVVENI	18.2	AVDPGLVK-IQIVEVPR-VLQDVIER-QAADILSSAPAMQIR-YLEAMQAMAK-	#
tam504_all	stomatin family protein [Talaromyces marneffei ATCC 18224]	gi%7c212526880 gi%7c210072995	38116	188	91	5	0.14	MASSINTSTNGNGKAPQAAGNRPANSLVQVQPARAEDLQPRYAQQIKHDDDNPDAHGWYASMIHGLGECIGCLGAIPCCVFCPNPFKPVAQGEVGLIQRFGRFERAVDPGLVKVNPLSERLRTVDVKIQIVEVPRQVCMTKDNVTLNLTSVIYYHIVAPHKTAFGITDVRQALIERTQTTLRHVVGARVLQDVIERREEIAQSISEIIEDVAAGWGVKVESMLIKDIIFSNDLQDSLSMAAQSKRIGESKVIAARAEVESAKLMRQAADILSSAPAMQIRYLEAMQAMAKTANSKVIFLPAPGQTVSQQLSLAENLGEGPSRYQNQDHSYENEDGFQRAINARVVENI	18.2	AVDPGLVK-IQIVEVPR-VLQDVIER-QAADILSSAPAMQIR-YLEAMQAMAK-	#
tam504_all	stomatin family protein [Aspergillus flavus NRRL3357]	gi%7c238489641 gi%7c220698446	37252	188	91	5	0.14	MSAEDSVVNGKAPAQPGSHHDRGHSGLVSVQPARLADLQPRYAQKLEHDAENPEAHGWYAGLIHSLGECIGFLGAIPCCVCCPNPYKPVAQGEVGLVSKFGRFERAVDPGLVKVNPLSEHLTAVDVKIQIVEVPRQVCMTKDNVTLNLTSVIYYQIVSPHKAAFGISNVRQALVERTQTTLRHVIGARVLQDVIERREEIAQSTSEIIEDVAAGWGVQVESMLIKDIIFSDDLQDSLSMAAQSKRIGESKVIAARAEVESAKLMRQAADILSSAPAMQIRYLEAMQAMAKTANSKVIFLPAMNQTVQQQLAAADNAGEGPSRYGTGNVDDGFQRAMNARVVENI	18.2	AVDPGLVK-IQIVEVPR-VLQDVIER-QAADILSSAPAMQIR-YLEAMQAMAK-	#
tam504_all	stomatin family protein [Talaromyces stipitatus ATCC 10500]	gi%7c242782030 gi%7c218720067	38808	188	91	5	0.13	MASSVTNPPSTNGHTSANGKAPQVPTNQASLVHVQPARVEDLQPRYAQQIKHDDDNPDAHGWYASMIHGLGECMGCLGAIPCCLLCPNPFKSVAQGEVGLISRFGRFERAVDPGLVKVNPLSERLTTVDVKIQIVEVPRQVCMTKDNVNLNLTSVIYYHIISPHKTAFGIADVRQALVERTQTTLRHVVGARVLQDVIERREEIAQSISEIIEDVAAGWGVKVESMLIKDIIFSNDLQDSLSMAAQSKRIGESKVIAARAEVESAKLMRQAADILSSAPAMQIRYLEAMQAMAKTANSKVIFLPAPGQTVSQQLSLAENLGEGPSKYQTLDNNWNTGNENDDGFQRAVNARVVENI	18.2	AVDPGLVK-IQIVEVPR-VLQDVIER-QAADILSSAPAMQIR-YLEAMQAMAK-	#
tam504_all	hypothetical protein HMPREF1120_01950 [Exophiala dermatitidis NIH/UT8656]	gi%7c378727307	38721	188	91	5	0.13	MESPRTSGLDNGKTATPPVGFRPQNGGIIKVEPPRREDLQPSYAQTLQGDTEAETHGWYGSMINSLGNCLGFMGAIPCCVICPNPYKPVSQGNVGLVTKFGRFARAVDPGLVKINPLSERLIQVDVKIQIVEVPRQVCMTKDNVTLNLTSVIYYHITSPHKAAFGISNVRQALVERTQTTLRHVVGARVLQDVIERREEIAQSIGEIIEDVASGWGVQVESMLIKDIIFSNDLQDSLSMAAQSKRIGESKVIAARAEVESAKLMRQAADILSSAPAMQIRYLEAMQAMAKTANSKVIFLPAANQTMPTNMGDIIQQQHTGGESSGFNSKQNTSNAFSTDANDGFQQAMNARVIENI	18.2	AVDPGLVK-IQIVEVPR-VLQDVIER-QAADILSSAPAMQIR-YLEAMQAMAK-	#
tam504_all	hypothetical protein PDE_05118 [Penicillium oxalicum 114-2]	gi%7c525583918	38264	188	91	5	0.13	MSLNGVNNPGSENSDINGKAPLRDPPAARAGQSLVNVQPARLSDLQPRYAAVIKHGDDNPDAHGWYAQLIHALGECIGFCGAIPCCLCCPNPFKPVDQGEVGLVTRFGRFERAVDPGLVKVNPLSEHLTTVDVKIQIVEVPRQVCMTKDNVTLNLTSVIYYQVTSPHKTAFGISNVKQALVERTQTTLRHVIGARVLQDVIERREEIAQSTAEIIEEVAAGWGVQVESMLIKDIIFSNDLQDSLSMAAQSKRIGESKVIAARAEVESAKLMRQAADILSSAPAMQIRYLEAMQAMAKTANSKVIFLPATNQTVQQQLATADAAGEGPSNYGTIQNRQDEGFERAMKASVVEDI	18.2	AVDPGLVK-IQIVEVPR-VLQDVIER-QAADILSSAPAMQIR-YLEAMQAMAK-	#
tam504_all	stomatin family protein [Aspergillus fumigatus Af293]	gi%7c70999113 gi%7c66851915 gi%7c159127296	37442	188	91	5	0.14	MATEANIPNGKAPVHSAPGHSAHTRGPVVVQPARIDDLQPSYAQQIQHNADNPDAHSWYASLIHTLGECIGGLGAIPCCICCPNPFKPVAQGEVGLVTKFGRFERAVDPGLVKVNPLSEHLTTVDVKIQIVEVPRQVCMTKDNVTLNLTSVIYYQIISPHKAAFGISNIRQALIERTQTTLRHVIGARVLQDVIERREEIAQSTSEIIEEVAAGWGVLVESMLIKDIIFSNDLQDSLSMAAQSKRIGESKVIAARAEVESAKLMRQAADILSSAPAMQIRYLEAMQAMAKTANSKVIFLPAVNQTVQQQLAAADNAGEGPSKYGAGQPVQADDGFQRAINARVVEDI	18.2	AVDPGLVK-IQIVEVPR-VLQDVIER-QAADILSSAPAMQIR-YLEAMQAMAK-	#
tam504_all	ADP/ATP carrier protein [Neosartorya fischeri NRRL 181]	gi%7c119496711 gi%7c119413291	34381	288	89	5	0.18	MAKGDVNQADKTVFGMPGFVVDFLMGGVSAAVSKTAAAPIERIKLLVQNQDEMIRAGRLDRKYNGIVDCFRRTAQAEGVMSLWRGNTANVIRYFPTQALNFAFRDTYKSMFAYKKDRDGYAKWMMGNLASGGAAGATSLLFVYSLDYARTRLANDAKSAKGGGERQFNGLVDVYRKTLASDGIAGLYRGFGPSVLGIVVYRGLYFGMYDSIKPVVLVGSLEGSFLASFLLGWTVTTGAGIASYPLDTIRRRMMMTSGEAVKYKSSMDAARQIVAKEGVKSLFKGAGANILRGVAGAGVLSIYDQVQLILFGKKFKGGSG	17.8	TAQAEGVMSLWR-YFPTQALNFAFR-QFNGLVDVYR-TLASDGIAGLYR-GFGPSVLGIVVYR-	#
tam504_all	Woronin body protein HexA_ putative [Penicillium digitatum Pd1]	gi%7c425774660	51618	185	76	5	0.09	MEPNKIGAKRSQMSFDPKVAMEILPSVNLDFDARVPIPFSVFPSSYRSDAVSETTQIRVEGEVNFDHTSRVEREDTRDSTPLPAPVHGKEEVEFRVQEEHSQYEQQSQQYEHQPSHNYAPEVELTRERYPSHQQSSLEYQDHTQVYDKVVETQIDLTERDYRSRTSPSNDLDVSDDRRYRQPIDSAYGYQSQSLEISNDRTSEPQTDSYKEDDVYLREVQPRARYSTPTQVKVSQSTTSEITSTRKMGYYNDEGQYHSFRRGVERAADRVMHPFSQSEIEETASGEVVAASESVRVVEPRNRGAAAETVPIPCHFVRVGDILILQGRPCQVIRISVSPQTGQHRYLGVDLFTRKLHEESSFIANPSPSVVVQTMLGPVYKTYRILDLRDDNRLVAMTEN…	15.2	ISVSPQTGQHR-YLGVDLFTR-ISEAFSDGR-ISEAFSDGRGSVR-ALVINDGGR-	#
tam504_all	mitochondrial F1 ATPase subunit alpha_ putative [Neosartorya fischeri NRRL 181]	gi%7c119484592 gi%7c119410231	59900	268	63	5	0.11	MFRNALRQSSRTVAAATATGRIASVRAAVPGPLAGASKQVRSYAAEAKASPTEVSSILEQRIRGVQEEAGLAETGRVLSVGDGIARVHGMTNVQAEELVEFASGVKGMCMNLEAGQVGVVLFGSDRLVKEGETVKRTGEIVDVPVGPELLGRVVDALGNPIDGKGPINTKAKSRAQLKAPGILPRRSVNQPVQTGLKCVDSMVPIGRGQRELIIGDRQTGKTAVALDAMLNQKRWNNSSDESKKLYCIYVAVGQKRSTVAQLVKTLEENDAMKYSIVVAATASEAAPLQYLAPFTGCAMGEWFRDNGRHAVIVYDDLSKQAVAYRQMSLLLRRPPGREAYPGDVFYLHSRLLERAAKMNDKHGGGSLTALPVIETQGGDVSAYIPTNVISITDGQIFLE…	12.6	GVQEEAGLAETGR-VLSVGDGIAR-TGEIVDVPVGPELLGR-VVDALGNPIDGK-EAYPGDVFYLHSR-	#
tam504_all	ATP synthase subunit alpha [Aspergillus oryzae RIB40]	gi%7c169766380 gi%7c238483087 gi%7c83765516 gi%7c220700832 gi%7c391864757	59901	268	63	5	0.11	MFRNALRQSSRTVAAATATGRIASVRAAAPGPVSAAAKQVRTYAAEAKASPTEVSSILEQRIRGVQEEAGLAETGRVLSVGDGIARVHGMTNVQAEELVEFASGVKGMCMNLEAGQVGVVLFGSDRLVKEGETVKRTGEIVDVPVGPELLGRVVDALGNPIDGKGPLNTKAKSRAQLKAPGILPRRSVNQPVQTGLKCVDSMVPIGRGQRELIIGDRQTGKTAVALDAMLNQKRWNNTSDESKKLYCIYVAVGQKRSTVAQLVKTLEENDAMKYSIVVAATASEAAPLQYLAPFTGCAMGEWFRDNGRHAVIIYDDLSKQAVAYRQMSLLLRRPPGREAYPGDVFYLHSRLLERAAKMNDTHGGGSLTALPVIETQGGDVSAYIPTNVISITDGQIFLE…	12.6	GVQEEAGLAETGR-VLSVGDGIAR-TGEIVDVPVGPELLGR-VVDALGNPIDGK-EAYPGDVFYLHSR-	#
tam504_all	mitochondrial F1 ATPase subunit alpha_ putative [Talaromyces marneffei ATCC 18224]	gi%7c212545749 gi%7c212545751 gi%7c210064548 gi%7c210064549	59693	268	63	5	0.11	MFRNALRQSSRSVAAVSVSGRLASARVAAPSPFAAGAKQVRSYAAEAKASPTEVSSILEQRIRGVQEEAGLAETGRVLSVGDGIARVHGLNNVQAEELVEFASGVKGMTMNLEAGQVGVVLFGSDRLVKEGETVRRTGEIVDVPVGPELLGRVVDALGNPIDGKGPLNTKAKARAQLKAPGILPRRSVHEPVQTGLKSVDSMVPIGRGQRELIIGDRQTGKTAVALDAILNQKRINAGSDESKKLYCVYVAVGQKRSTVAQLVKTLEENDALKYSIIVAATASEAAPLQYLAPFTGTAMGEYFRDNGRHAVIVYDDLSKQAVAYRQMSLLLRRPPGREAYPGDVFYLHSRLLERAAKLNDKHGGGSLTALPVIETQGGDVSAYIPTNVISITDGQIFLE…	12.6	GVQEEAGLAETGR-VLSVGDGIAR-TGEIVDVPVGPELLGR-VVDALGNPIDGK-EAYPGDVFYLHSR-	#
tam504_all	ATPase alpha subunit [Paracoccidioides brasiliensis Pb18]	gi%7c226291035	60176	268	63	5	0.11	MFRNALRQSSRSVTAVCASGRIAGVRGATPGPLAVASKQARTYAAEAKAAPTEVSSILEQRIRGVQEEAGLAETGRVLSVGDGIARVHGMTNVQAEELVEFSSGVKGMCMNLEAGQVGVVLFGSDRLVKEGETVKRTGEIVDVPVGPELLGRVVDALGNPIDGKGPIKTTEKRRAQLKAPGILPRRSVNQPVQTGLKSVDSMVPIGRGQRELIIGDRQTGKTAVALDAMLNQKRWNDTGDETKKLYCVYVAVGQKRSTVAQLVKTLEENDAMKYSIIVAATASEAAPLQYIAPFTGCAMGEWFRDNGRHALIIYDDLSKQAVAYRQMSLLLRRPPGREAYPGDVFYLHSRLLERAAKLNDKHKGGSLTALPVIETQGGDVSAYIPTNVISITDGQIFLE…	12.6	GVQEEAGLAETGR-VLSVGDGIAR-TGEIVDVPVGPELLGR-VVDALGNPIDGK-EAYPGDVFYLHSR-	#
tam504_all	mitochondrial F1 ATPase subunit alpha_ putative [Talaromyces stipitatus ATCC 10500]	gi%7c242820468 gi%7c218713981	59907	268	63	5	0.11	MFRNALRQSSRSVAAVSVSGRLASARVAAPSPFAAGAKQVRSYAAEAKASPTEVSSILEQRIRGVQEEAGLAETGRVLSVGDGIARVHGLNNVQAEELVEFASGVKGMTMNLEAGQVGVVLFGSDRLVKEGETVRRTGEIVDVPVGPELLGRVVDALGNPIDGKGPINTKAKARAQLKAPGILPRRSVHEPVQTGLKSVDSMVPIGRGQRELIIGDRQTGKTAVALDAILNQKRINATSDESKKLYCVYVAVGQKRSTVAQLVKTLEENDALKYSIIVAATASEAAPLQYLAPFTGCAMGEWFRDNGRHAVIIYDDLSKQAVAYRQMSLLLRRPPGREAYPGDVFYLHSRLLERAAKLNDKHGSGSLTALPVIETQGGDVSAYIPTNVISITDGQIFLE…	12.6	GVQEEAGLAETGR-VLSVGDGIAR-TGEIVDVPVGPELLGR-VVDALGNPIDGK-EAYPGDVFYLHSR-	#
tam504_all	ATP synthase alpha subunit [Arthroderma otae CBS 113480]	gi%7c296805997 gi%7c238845120	60191	268	63	5	0.11	MFRSALRQSSRSVTAVAATGRLSAVRAGTPNPLASVSKQVRSYAAEAKPAPTEVSSILEQRIRGVQEEAGLAETGRVLSVGDGIARVHGMHNVQAEELVEFASGVKGMCMNLEAGQVGVVLFGSDRLVKEGETVKRTGEIVDVPVGPELLGRVVDALGNPIDGKGPIKATEKRRAQLKAPGILPRKSVNQPVQTGMKCVDSMVPIGRGQRELIIGDRQTGKTAVALDTMLNQKRWNSSSDESKKLYCVYVAVGQKRSTVAQLVKTLEENDAMKYSIIVAATASEAAPLQYIAPFTGCAMGEWFRDNGRHALIIYDDLSKQAVAYRQMSLLLRRPPGREAYPGDVFYLHSRLLERAAKLNDNHKGGSLTALPIIETQGGDVSAYIPTNVISITDGQIFLE…	12.6	GVQEEAGLAETGR-VLSVGDGIAR-TGEIVDVPVGPELLGR-VVDALGNPIDGK-EAYPGDVFYLHSR-	#
tam504_all	ATPase alpha subunit [Trichophyton tonsurans CBS 112818]	gi%7c326472094 gi%7c326477041	60076	268	63	5	0.11	MFRSALRQSSRSVAAVSVSGRVSAVRAGTPSPLAAVSKQVRSYAAEAKPAPTEVSSILEQRIRGVQEEAGLAETGRVLSVGDGIARVHGMHNVQAEELVEFASGVKGMCMNLEAGQVGVVLFGSDRLVKEGETVKRTGEIVDVPVGPELLGRVVDALGNPIDGKGPIKAAEKRRAQVKAPGILPRKSVNQPVQTGMKCVDSMVPIGRGQRELIIGDRQTGKTAVALDTMLNQKRWNSSNDETKKLYCVYVAVGQKRSTVAQLVKTLEENDAMKYSIVVAATASEAAPLQYIAPFTGCAMGEWFRDNGRHALIIYDDLSKQAVAYRQMSLLLRRPPGREAYPGDVFYLHSRLLERAAKLNDTHKGGSLTALPVIETQGGDVSAYIPTNVISITDGQIFLE…	12.6	GVQEEAGLAETGR-VLSVGDGIAR-TGEIVDVPVGPELLGR-VVDALGNPIDGK-EAYPGDVFYLHSR-	#
tam504_all	mitochondrial F1 ATPase subunit alpha [Trichoderma atroviride IMI 206040]	gi%7c358400735	59546	268	63	5	0.11	MFRNALRQSSRAVGAVAAGRVSVTRNAAPVAINAVRTYASDAKASPTEVSSILEQRIRGVQEEAGLAETGRVLSVGDGIARVHGMANVQAEELVEFASGVKGMCMNLEAGQVGVVLFGSDRLVKEGETVKRTGEIVDVPVGPELLGRVVDALGNPIDGKGPLNSKEKRRAQLKAPGILPRKSVNQPVQTGLKSVDAMVPIGRGQRELIIGDRQTGKTAVALDTILNQKRWNSSDDETKKLYCIYVAVGQKRSTVAQFVKTLEENDAMKYSIVVAATASEAAPLQYIAPFTGASIGEWFRDNGKHSLVIYDDLSKQAVAYRQMSLLLRRPPGREAYPGDVFYLHSRLLERAAKLNDKHGGGSMTALPVIETQGGDVSAYIPTNVISITDGQIFLESELFY…	12.6	GVQEEAGLAETGR-VLSVGDGIAR-TGEIVDVPVGPELLGR-VVDALGNPIDGK-EAYPGDVFYLHSR-	#
tam504_all	ATP synthase subunit alpha_ mitochondrial [Geomyces destructans 20631-21]	gi%7c440632111	59716	268	63	5	0.11	MFRNALRQSSRTVGAISASGRVAAGRIAAPAAFNASAIQARTYAEAKAAPTEVSSILEQKIRGVQEEAGLAETGRVLSVGDGIARVHGMSNVQAEELVEFASGVKGMCMNLEAGQVGVVLFGSDRLVKEGETVKRTGEIVDVPVGPELLGRVVDALGNPIDGKGPINTKEKRRAQVKAPGILPRHSVNQPVQTGMKSVDAMVPIGRGQRELIIGDRQTGKTAVALDTMLNQKRWNNGTDDSKKLYCVYVAVGQKRSTVAQLVKTLEENDAMKYSIVVAATASEAAPLQYIAPFTATSMGEWFRDNGKHAVIIFDDLSKQAVAYRQMSLLLRRPPGREAYPGDVFYLHSRLLERAAKMSDKHGGGSLTALPIIETQGGDVSAYIPTNVISITDGQIFLEA…	12.6	GVQEEAGLAETGR-VLSVGDGIAR-TGEIVDVPVGPELLGR-VVDALGNPIDGK-EAYPGDVFYLHSR-	#
tam504_all	putative atp synthase subunit alpha protein [Togninia minima UCRPA7]	gi%7c500258875	59798	268	63	5	0.11	MFRNALRQSSRAVGAISATGRVAAARNAAPAAFNAAAIQSRTYAADAKASPTEVSSILEQRIRGVQEEAGLAETGRVLSVGDGIARVHGMANVQAEELVEFASGVKGMCMNLEAGQVGVVLFGSDRLVKEGETVKRTGEIVDVPVGPELLGRVVDALGNPIDGKGPLNTKEKRRAQLKAPGILPRRSVNQPVQTGLKSIDAMVPIGRGQRELIIGDRQTGKTAVALDAMLNQKRWNSGNDETKKLYCIYVAVGQKRSTVAQLVKTLEENDAMKYSIVVAATASEAAPLQYIAPFTGASIGEYFRDNGKHALLIFDDLSKQAVAYRQMSLLLRRPPGREAYPGDVFYLHSRLLERAAKMSDKHGGGSLTALPIIETQGGDVSAYIPTNVISITDGQIFLE…	12.6	GVQEEAGLAETGR-VLSVGDGIAR-TGEIVDVPVGPELLGR-VVDALGNPIDGK-EAYPGDVFYLHSR-	#
tam504_all	hypothetical protein PDE_01674 [Penicillium oxalicum 114-2]	gi%7c525580485	109231	169	26	5	0.03	MAERRISYAPDVENGDRHRDAGDVNDGSLDEYSALNRYISTARDGRRGSTSSAAALSTKQKKKPFWKFWAKEGDGVVEGWQCPDEWLETDLRSGLSSSDIEPRRKKCGWNELVTEKTNIFVQFIGYFRGPILYVMELAVLLAAGLRDWIDLGVIIGILMLNALVGWYQEKQAADVVASLKGDIAMRAIVVRNGQEEEILARELVTGDIVVVEEGHVIPADVRLICDYSKPEMFEAYKEYLISSQDDTLKEKAEDDDEDSREVHQGVSLIACDQSAITGESLAVDKYMADTCYYTTGCKRGKAYGIVTATARQSFVGKTAALVQGAKDSGHFKAVMDNIGTSLLVLVMFWILAAWIGGFFRHLGIATPENSENTLLRYTLILLIIGVPVGLPVVTTTTLA…	5.2	AIVVRNGQEEEILAR-NGQEEEILAR-AYGIVTATAR-VTILTLR-AYIQYR-	#
tam504_all	peptidase M48 [Nocardiopsis synnemataformans]	gi%7c516137896	38900	187	148	4	0.09	MANTPDRVRVRLSEISPRAYEHPADRGALVALRSLRGFDEVFKRLSGLFNERALRLMFLSSAVRVGPTQFPHVYDYVRDAAYVLDMDEVPELYIQMNPKPNAMAIGSNRPFIVMTTGLFELLDAEEQRFVIGHEVGHILSGHAVYRTMLLALIRLATRVAWVPLGFIGIQAIVAALEEWYRKSELSCDRAGILASQNPEAGKRALMKLAGGSKLVEMNPDAFLEQAREYESGGDARDSLIKLISLVGQTHPFAVVRLAELHRWIEDGSYQRIIDGDYPRRSTDRDARVGDEARKAANSYKESWDRTGDPLLGTLRDVAGSAASAGGKIFDTVADRWRNGSSRTSQGSGNSS	37	LSGLFNER-LMFLSSAVR-TMLLALIR-IIDGDYPR-	#
tam504_all	Cobalt-containing nitrile hydratase subunit alpha [Rhodococcus sp. EsD8]	gi%7c493997872 gi%7c806581 gi%7c24935342 gi%7c27261875 gi%7c50593059 gi%7c482631104	22776	182	80	4	0.24	MSEHVNKYTEYEARTKAIETLLYERGLITPAAVDRVVSYYENEIGPMGGAKVVAKSWVDPEYRKWLEEDATAAMASLGYAGEQAHQISAVFNDSQTHHVVVCTLCSCYPWPVLGLPPAWYKSMEYRSRVVADPRGVLKRDFGFDIPDEVEVRVWDSSSEIRYIVIPERPAGTDGWSEDELAKLVSRDSMIGVSNALTPQEVIV	20	GLITPAAVDR-DFGFDIPDEVEVR-VWDSSSEIR-DSMIGVSNALTPQEVIV-	#
tam504_all	ADP/ATP carrier protein [Aspergillus terreus NIH2624]	gi%7c115389520 gi%7c114194661	34166	244	72	4	0.14	MAKGDVNQAEKSVFGMPGFVVDFLMGGVSAAVSKTAAAPIERIKLLIQNQDEMLRAGRLDRKYNGIMDCFRRTAASEGVVSLWRGNTANVIRYFPTQALNFAFRDTYKSMFSYKKDRDGYAKWMMGNLASGGAAGATSLLFVYSLDYARTRLANDAKSAKGGGDRQFNGLVDVYKKTLASDGIAGLYRGFGPSVAGIVVYRGLYFGMYDSIKPVVLVGPLEGNFLASFLLGWTVTTGAGIASYPLDTVRRRMMMTSGEAVKYSSSFDAFRQIVAKEGYKSLFKGAGANILRGVAGAGVLSIYDQVQLILFGKKFK	18	LLIQNQDEMLR-TAASEGVVSLWR-YFPTQALNFAFR-TLASDGIAGLYR-	#
tam504_all	ADP/ATP carrier protein [Aspergillus niger CBS 513.88]	gi%7c145255160 gi%7c134084470 gi%7c350630687 gi%7c358366806	34383	244	72	4	0.14	MAKGDVNQADKTVFGMPGFVVDFLMGGVSAAVSKTAAAPIERIKLLIQNQDEMLRAGRLDRKYNGIMDCFRRTAASEGVVSLWRGNTANVIRYFPTQALNFAFRDTYKSMFSYKKERDGYTKWMMGNLASGGAAGATSLLFVYSLDYARTRLANDAKSAKGGGDRQFNGLVDVYKKTLASDGIAGLYRGFGPSVAGIVVYRGLYFGMYDSIKPVVLVGPLEGNFLASFLLGWTVTTGAGIASYPLDTIRRRMMMTSGEAVKYKSSMDAARQIVAKEGVKSLFKGAGANILRGVAGAGVLSIYDQVQLILFGKKYKGGSG	18	LLIQNQDEMLR-TAASEGVVSLWR-YFPTQALNFAFR-TLASDGIAGLYR-	#
tam504_all	S-adenosylmethionine synthetase [Saccharopolyspora erythraea NRRL 2338]	gi%7c134100435 gi%7c500203949 gi%7c133913058	41319	214	71	4	0.11	MTEGHPDKMCDAISDSILDELLRQDPRSRVAVETLVTTGQVHVAGEVTTDAYADIPTIVREKILEIGYDSSVKGFDGSSCGVNVAIGQQSPDIGQGVDTAHESRVEGVIDEIAKQGAGDQGLMFGYACTDTDELAPLPITLAHRLSRRLTEVRKNGTLPYLRADGKTQVTIEYAGDQPVRLDTVVLSTQHAEDVDLDATLSKDIQKHVISPELERVGLDTSDLRLLVNPTGRFVVGGPMGDAGLTGRKIIVDTYGGMARHGGGAFSGKDPSKVDRSAAYATRWVAKNAVAAGLASRIEVQVAYAIGKAAPVGLFVETFGTENVDPVKIQAAINEVFDLRPAAIIRDLDLLRPIYAPTAAYGHFGRSDVDLPWERTDRAEALKSAAGI	17.75	VGLDTSDLR-FVVGGPMGDAGLTGR-IIVDTYGGMAR-NAVAAGLASR-	#
tam504_all	tubulin beta_ putative [Talaromyces stipitatus ATCC 10500]	gi%7c242768278 gi%7c218724732	49724	193	54	4	0.1	MREIVHLQTGQCGNQIGAAFWQIISAEHGLDGSGVYNGSSDLQLERMNVYFNEASGNKYVPRAVLVDLEPGTMDAVRAGPFGQLFRPDNFVFGQSGAGNNWAKGHYTEGAELVDQVVDVVRREAEACDCLQGFQITHSLGGGTGAGMGTLLISKIREEFPDRMMATFSVVPSPKVSDTVVEPYNATLSVHQLVEHSDETFCIDNEALYDICTRTLKLSSPSYGDLNHLVSTVMSGVTTSLRFPGQLNSDLRKLAVNMVPFPRLHFFMVGFAPLTSRGSYSFRAVTVPELTQQMYDPKNMMAASDFRNGRYLTCSALFRGKVSMKEVEDQMRNVQNKNSSYFVEWIPNNVQTALCSVPPRGLKMAATFVGNSTAIQELFKRIGDQFTAMFRRKAFLHWYT…	13.5	AVLVDLEPGTMDAVR-FPGQLNSDLR-LAVNMVPFPR-IGDQFTAMFR-	#
tam504_all	beta-tubulin [Parastagonospora nodorum]	gi%7c299296 gi%7c446756	49906	193	54	4	0.1	MREIVYLQTGQCGNQIGAAFWQTISGEHGLDGSGVYNGTSDLQLERMNVYFNEASGNKFVPRAVLVDLEPGTMDAVRAGPFGQLFRPDNFVFGQSGAGNNWAKGHYTEGAELVDQVLDVVRREREGCDCLQGFQITHSLGGGTGAGMGTLLISKIREEFPDRMMATFSVVPSPKVSDTVVEPYNATLSIHQLVENSDETFCIDNEALYDICMRTLKLNNPSYGDLNHLVSAVMSGVTTCLRFPGQLNSDLRKLAVNMVPFPRLHFFMVGFAPLTSRGAHSFRAVTVPELTQQMFDPKNMMAASDFRNGRYLTCSAYFRGKVSMKEVEDQMRNVQNKNSSYFVEWIPNNVQTALCSVPPRGLKMSATFVGNSTSIQELFKRIGDQFTAMFRRKAFLHWYT…	13.5	AVLVDLEPGTMDAVR-FPGQLNSDLR-LAVNMVPFPR-IGDQFTAMFR-	#
tam504_all	beta-tubulin [Marssonina brunnea]	gi%7c362114696	49701	193	54	4	0.1	MREIVHLQTGQCGNQIGAAFWQTISGEHGLDGSGVYNGTSDLQLERLNVYFNEASGNKYVPRAVLVDLEPGTMDAVRAGPFGQLFRPDNFVFGQSGAGNNWAKGHYTEGAELVDQVLDVVRREAEGCDCLQGFQITHSLGGGTGAGMGTLLISKIREEFPDRMMATFSVVPSPKVSDTVVEPYNATLSIHQLVENSDETFCIDNEALYDICMRTLKLSNPSYGDLNHLVSAVMSGVTTCLRFPGQLNSDLRKLAVNMVPFPRLHFFMVGFAPLTSRGAHSFRAVAVPELTQQMFDPKNMMAASDFRNGRYLTCSAIFRGKVSMKEVEDQMRNVQNKNSSYFVGWIPNNVQTALCSIPPRGLKMSSTFVGNSTSIQELFKRIGDQFTAMFRRKAFLHWYT…	13.5	AVLVDLEPGTMDAVR-FPGQLNSDLR-LAVNMVPFPR-IGDQFTAMFR-	#
tam504_all	tubulin beta chain [Geomyces destructans 20631-21]	gi%7c440639856	49648	193	54	4	0.1	MREIVHLQTGQCGNQIGAAFWQTISGEHGLDGSGVYNGTSDLQLERMNVYFNEASGNKYVPRAVLVDLEPGTMDAVRAGPFGQLFRPDNFVFGQSGAGNNWAKGHYTEGAELVDQVLDVVRREAEGCDCLQGFQITHSLGGGTGAGMGTLLISKIREEFPDRMMATFSVVPSPKVSDTVVEPYNATLSIHQLVENSDETFCIDNEALYDICMRTLKLTAPSYGDLNHLVSAVMSGVSTSLRFPGQLNSDLRKLAVNMVPFPRLHFFMVGFAPLTSRGAHSFRAVTVPELTQQMFDPKNMMAASDFRNGRYLTCSAIFRGKVSMKEVEDQMRNVQNKNSSYFVEWIPNNVQTALCSIPPRGLKMSSTFVGNSTSIQELFKRIGDQFTAMFRRKAFLHWYT…	13.5	AVLVDLEPGTMDAVR-FPGQLNSDLR-LAVNMVPFPR-IGDQFTAMFR-	#
tam504_all	hypothetical protein PDE_00677 [Penicillium oxalicum 114-2]	gi%7c525579491	49984	193	54	4	0.1	MREIVHLQTGQCGNQIGAAFWQTIAGEHGLDGDGHYNGSSDLQLERMNVYFTHASGDKYVPRAVLVDLEPGTMDAVRAGPFGKLFRPDNFVFGQSGAGNNWAKGHYTEGAELVDQVIDVVRREAEACDCLQGFQITHSLGGGTGAGMGTLLISKIREEFPDRMMATFSVVPSPKVSDTVVEPYNATLSVHQLVEHSDETFCIDNEALYDICMRTLKLSSPSYGDLNHLVSAVMSGVTTSLRFPGQLNSDLRKLAVNMVPFPRLHFFMVGFAPLTSRGAYQYRQVSVPELTQQMFDPKNMMAASDFRNGRYLTCSALFRGQVSMKEVEDQMRNIQNKNSSYFVEWIPNNVQTALCSVPPRGLRMSSTFVGNSTSIQELFKRIGDQFTAMFRRKAFLHWYT…	13.5	AVLVDLEPGTMDAVR-FPGQLNSDLR-LAVNMVPFPR-IGDQFTAMFR-	#
tam504_all	40S ribosomal protein S3 [Tuber melanosporum Mel28]	gi%7c296423595 gi%7c295637576	39062	156	35	4	0.1	MVNDFAQLKNTVTRPISTERDALPGDGVGQTPLSPPHPTKQPTLSEESLQPPTTDERQRSRLAKPAINSRYNISETSITMASAQSQTISKRRKFVADGVFYAELNEFFTRELAEEGYSGVEVRVTPTVTDIIIRATHTQEVLGEQGRRIRELTSLIQKRFKFPENSVSLYAAKVQNRGLCAVAQCESLRYKLLNGLAVRRACYGVLRFIMESGAKGCEVVVSGKLRAARAKSMKFTDGFMIHSGQPARDFIDSATRHVLLRQGVLGIKVKIMRGSDPDGKSGPQKSLPDTVTVIEPKEEAPIGQPSSQDYGAKADAARAAATQAQAQENVAAEQVGVEAGNEDAAAEYAPPAPAEDLGGW	8.75	ELAEEGYSGVEVR-VTPTVTDIIIR-ATHTQEVLGEQGR-ATHTQEVLGEQGRR-	#
tam504_all	hypothetical protein AOL_s00006g259 [Arthrobotrys oligospora ATCC 24927]	gi%7c345570572	29455	156	35	4	0.14	MATTTAISKRRKAVADGVFYAELNEFFTRELAEEGYSGVEVRVTPTVTDIIIRATHTQEVLGEQGRRIRELTSLIQKRFKFPENSVSLYAAKVQNRGLCAVAQCESLRYKLLNGLAVRRACYGVLRFIMESGAKGCEVVVSGKLRAARAKSMKFTDGFMIHSGQPVRDFIDSATRHVLLRQGVLGIKVKIMRGSDPDGKAGPNKSLPDTVTIIEPKEEQPVLAPNSQDYTAKPVANIPPPTEEAAPAPEAYEQPPQPPAAAPAPVQEAGW	8.75	ELAEEGYSGVEVR-VTPTVTDIIIR-ATHTQEVLGEQGR-ATHTQEVLGEQGRR-	#
tam504_all	40S ribosomal protein S3 [Coccidioides immitis RS]	gi%7c119187711 gi%7c303316826 gi%7c240108096 gi%7c320038258 gi%7c392871183	28837	154	35	4	0.14	MAAIQGTISKRRKFVADGVFYAELNEFFQRELAEEGYSGVEVRVTPTVTDIIIRATHTQEVLGEQGRRIRELTSLIQKRFKFPENSVSLYAAKVQNRGLSAVAQCESLRYKLLNGLAVRRACYGVLRFIMESGAKGCEVVVSGKLRAARAKSMKFTDGFMIHSGQPAKDFIDSATRHVLLRQGVLGIKVKIMRGSDPEGKSGPQKSLPDSVTIIEPKEEQPVLQPMSQDYGAKAAAAQQAAEQQRLAEQEGQEGAEAAAVPQE	8.75	ELAEEGYSGVEVR-VTPTVTDIIIR-ATHTQEVLGEQGR-ATHTQEVLGEQGRR-	#
tam504_all	40S ribosomal protein S3 [Aspergillus clavatus NRRL 1]	gi%7c121702671 gi%7c119397743	29252	154	35	4	0.14	MAAVQGAISKRRKFVADGVFYAELNEFFQRELAEEGYSGVEVRVTPTVTDIIIRATHTQEVLGEQGRRIRELTSLIQKRFKFPENSVSLYAAKVQNRGLSAVAQCESLRYKLLNGLAVRRACYGVLRFIMESGAKGCEVVVSGKLRAARAKSMKFTDGFMIHSGQPAKEFIDSATRHVLLRQGVLGIKVKIMRGSDPEGKAGPQKTLPDSVTIIEPKEEQPVLQPMSQDYGAKALAAQQAAEQQRLAEQQAAEGQEAAPAAEGYAQE	8.75	ELAEEGYSGVEVR-VTPTVTDIIIR-ATHTQEVLGEQGR-ATHTQEVLGEQGRR-	#
tam504_all	40S ribosomal protein S3 [Ajellomyces capsulatus NAm1]	gi%7c154284746 gi%7c150406809	25828	154	35	4	0.15	MAAVQGAISKRRKFVADGVFYAELNEFFQRELAEEGYSGVEVRVTPTVTDIIIRATHTQEVLGEQGRRIRELTSLIQKRFKFPENSVSLYAAKVQNRGLSAVAQCESLRYKLLNGLAVRRACYGVLRFIMESGAKGCEVVVSGKLRAARAKSMKFTSKSCAAAIPEGEVGSPEILPDSVTIIEPKEEQPVLQPLSQDYGAKALAAQQLAEQQRLAPQQEAEAAGQAAGGTEGAVEGAQE	8.75	ELAEEGYSGVEVR-VTPTVTDIIIR-ATHTQEVLGEQGR-ATHTQEVLGEQGRR-	#
tam504_all	40S ribosomal protein S3 [Neurospora crassa OR74A]	gi%7c164429154 gi%7c157072430 gi%7c336470035 gi%7c350290273	28649	154	35	4	0.14	MAVPGTQISKRRKFVADGVFYAELNEFFQRELAEEGYSGVEVRVTPTVTDIIIRATHTQEVLGEQGRRIRELTSLIQKRFKFPENSVSLYAAKVQNRGLSAVAQCESLRYKLLNGLAVRRACYGVLRFIMESGAKGCEVVVSGKLRAARAKSMKFTDGFMIHSGQPAKDFIDSATRHVLLRQGVLGIKVKIMRGSDPEGKSGPQKSLPDAVTIIEPKEEQPVTQPISQDYGAKAAQVQAAAEAARQEEQAGEEEAAAPAAEE	8.75	ELAEEGYSGVEVR-VTPTVTDIIIR-ATHTQEVLGEQGR-ATHTQEVLGEQGRR-	#
tam504_all	hypothetical protein [Podospora anserina S mat+]	gi%7c171686174 gi%7c170943048	28522	154	35	4	0.14	MAVPGTQISKRRKFVADGVFYAELNEFFQRELAEEGYSGVEVRVTPTVTDIIIRATHTQEVLGEQGRRIRELTSLIQKRFKFPENSVSLYAAKVQNRGLSAVAQCESLRYKLLNGLAVRRACYGVLRFIMESGAKGCEVVVSGKLRAARAKSMKFTDGFMIHSGQPAKDFIDSATRHVLLRQGVLGIKVKIMRGSDPEGKAGPQKSLPDAVTIIDPKEETPVVQPMSQDYGAKAAAAQAAAEAARQEEQAGAEEEAAPAAEQ	8.75	ELAEEGYSGVEVR-VTPTVTDIIIR-ATHTQEVLGEQGR-ATHTQEVLGEQGRR-	#
tam504_all	40S ribosomal protein S3 [Pyrenophora tritici-repentis Pt-1C-BFP]	gi%7c189188112 gi%7c330936377 gi%7c187972001 gi%7c311317666	29157	154	35	4	0.14	MATTQTAISKRRKFVADGVFYAELNEFFQRELAEEGYSGVEVRVTPTVTDIIIRATHTQEVLGEQGRRIRELTSLIQKRFKFPENSVSLYAAKVQNRGLSAVAQCESLRYKLLNGLAVRRACYGVLRFIMESGAKGCEVVVSGKLRAARAKSMKFTDGFMIHSGQPAKDFIDHATRHVLLRQGVLGIKVKIMRGSDPEGKAGPSKSLPDSVTIIEPKEEQPVVQPMSQDYGAKAIAAQQAAEQARQAEQGEGEAQPAGGEGYSEEQ	8.75	ELAEEGYSGVEVR-VTPTVTDIIIR-ATHTQEVLGEQGR-ATHTQEVLGEQGRR-	#
tam504_all	40S ribosomal protein S3 [Talaromyces marneffei ATCC 18224]	gi%7c212527956 gi%7c210073533	29236	154	35	4	0.14	MAATQGAISKRRKFVADGVFYAELNEFFQRELAEEGYSGVEVRVTPTVTDIIIRATHTQEVLGEQGRRIRELTSLIQKRFKFPENSVSLYAAKVQNRGLSAVAQCESLRYKLLNGLAVRRACYGVLRFIMESGAKGCEVVVSGKLRAARAKSMKFTDGFMIHSGQPAKEFIDSATRHVLLRQGVLGIKVKIMRGSDPEGKSGPQKTLPDAVTIIEPKEEQPILQPVSQDYGAKALAAQQLAEQQRLAEQQEAEGAEGAAPAEYVQE	8.75	ELAEEGYSGVEVR-VTPTVTDIIIR-ATHTQEVLGEQGR-ATHTQEVLGEQGRR-	#
tam504_all	similar to 40S ribosomal protein S3 [Leptosphaeria maculans JN3]	gi%7c396493922 gi%7c312220768	29027	154	35	4	0.14	MATTQSAISKRRKFVADGVFYAELNEFFQRELAEEGYSGVEVRVTPTVTDIIIRATHTQEVLGEQGRRIRELTSLIQKRFKFPENSVSLYAAKVQNRGLSAVAQCESLRYKLLNGLAVRRACYGVLRFIMESGAKGCEVVVSGKLRAARAKSMKFTDGFMIHSGQPAKDFIDHATRHVLLRQGVLGIKVKIMRGSDPEGKAGPSQTLPDSVTIIEPKEEQPVVQPMSQDYGAKAIAAQQAAEQARQAEQGEGEAQPAEGYAEEQ	8.75	ELAEEGYSGVEVR-VTPTVTDIIIR-ATHTQEVLGEQGR-ATHTQEVLGEQGRR-	#
tam504_all	hypothetical protein FG05433.1 [Fusarium graminearum PH-1]	gi%7c46122111	28131	154	35	4	0.14	MRISKRRKFVADGVFYAELNEFFQRELAEEGYSGVEVRVTPTVTDIIIRATHTQEVLGEQGRRIRELTSLIQKRFKFPENSVSLYAAKVQNRGLSAVAQCESLRYKLLNGLAVRRACYGVLRFIMESGAKGCEVVVSGKLRAARAKSMKFTDGFMIHSGQPAKDFIDHATRHVLLRQGVLGIKVKIMRGSDPEGKAGPQKTLPDAVTIIEPKEEQAVLQPVSQDYGAKAAQAAQAAQDARVAEEEGGEEVQAVEQ	8.75	ELAEEGYSGVEVR-VTPTVTDIIIR-ATHTQEVLGEQGR-ATHTQEVLGEQGRR-	#
tam504_all	40S ribosomal protein S3 [Aspergillus fumigatus Af293]	gi%7c70990926 gi%7c119496667 gi%7c66847944 gi%7c119413269 gi%7c159130785	29183	154	35	4	0.14	MAAVQGAISKRRKFVADGVFYAELNEFFQRELAEEGYSGVEVRVTPTVTDIIIRATHTQEVLGEQGRRIRELTSLIQKRFKFPENSVSLYAAKVQNRGLSAVAQCESLRYKLLNGLAVRRACYGVLRFIMESGAKGCEVVVSGKLRAARAKSMKFTDGFMIHSGQPAKEFIDSATRHVLLRQGVLGIKVKIMRGSDPEGKAGPQKTLPDSVTIIEPKEEQPVLQPMSQDYGAKALAAQQLAEQQRLAEQQAAEGQEGAGAEAYAQE	8.75	ELAEEGYSGVEVR-VTPTVTDIIIR-ATHTQEVLGEQGR-ATHTQEVLGEQGRR-	#
tam504_all	ATP synthase F1 subunit beta [Segniliparus rotundus DSM 44985]	gi%7c296393129 gi%7c502902662 gi%7c296180276	52274	195	13	4	0.1	MTATLQSNTNESAKTGAGRVVRVIGPVVDVEFPRDSVPELFNALHAEVTLPSVAKTLTLEVAQHLGDNIVRTISMQPTDGLVRGVPVADTGKPISVPVGDVVKGHVFNALGDCLDTPGAGRDGEQWGIHRKPPAFDQLEGKTEILETGIKVIDLLTPYVKGGKIGLFGGAGVGKTVLIQEMITRIAREFSGTSVFAGVGERTREGTDLKLEMEEMGVLQDTALVFGQMDEPPGTRMRVALSALTMAEYFRDVQNQDVLLFIDNIFRFTQAGSEVSTLLGRMPSAVGYQPTLADEMGQLQERITSTRGRSITSLQAIYVPADDYTDPAPATTFAHLDATTELSRPISQLGIYPAVDPLTSTSRILEASIVGDEHFRVANEVKRILQKYKELQDIIAILGM…	3.25	VIGPVVDVEFPR-TISMQPTDGLVR-IGLFGGAGVGK-FTQAGSEVSTLLGR-	#
tam504_all	ATP synthase subunit beta [Rhodococcus equi 103S]	gi%7c312139178 gi%7c491657280 gi%7c311888517 gi%7c325555538 gi%7c549122390	52022	195	13	4	0.1	MTAAVTQTNANGADTTSGRVVRVIGPVVDVEFPRGHVPDLFNALHSEVTLPSVAKTLTLEVAQHLGDNLVRTISMQPTDGLVRGAAVNDTGKPISVPVGDVVKGHVFNALGDCLDAPGTGRDGEQWGIHRKPPAFDQLEGKTEILETGIKVIDLLTPYVKGGKIGLFGGAGVGKTVLIQEMITRIAREFSGTSVFAGVGERTREGTDLHLEMEEMGVLQDTALVFGQMDEPPGTRMRVALSALTMAEYFRDVQGQDVLLFIDNIFRFTQAGSEVSTLLGRMPSAVGYQPTLADEMGELQERITSTRGRSITSLQAIYVPADDYTDPAPATTFAHLDATTELSRPISQMGIYPAVDPLTSTSRILEPGIVGAEHFRVANEVKRILQKYKELQDIIAILGM…	3.25	VIGPVVDVEFPR-TISMQPTDGLVR-IGLFGGAGVGK-FTQAGSEVSTLLGR-	#
tam504_all	ATP synthase beta chain [Rhodococcus sp. EsD8]	gi%7c494001773 gi%7c482629822	51963	195	13	4	0.1	MTAAVTDNYGAGAASATAGRVVRVIGPVVDVEFPRGAVPALFNALHAEVTLPSVAKTLTFEVAQHLGDNLVRTISMQPTDGLVRGTTVVDTGRPISVPVGDVVKGHVFNALGDCLDAPGTGRDGEQWGIHRKPPAFDQLEGKTEILETGIKVIDLLTPYVKGGKIGLFGGAGVGKTVLIQEMITRIAREFSGTSVFAGVGERTREGTDLHLEMEEMGVLQDTALVFGQMDEPPGTRMRVALSALTMAEYFRDIQGQDVLLFIDNIFRFTQAGSEVSTLLGRMPSAVGYQPTLADEMGELQERITSTRGRSITSLQAIYVPADDYTDPAPATTFAHLDATTELSRPISQMGIYPAVDPLTSTSRILEPGIVGAEHFRVANEVKRILQKYKELQDIIAILG…	3.25	VIGPVVDVEFPR-TISMQPTDGLVR-IGLFGGAGVGK-FTQAGSEVSTLLGR-	#
tam504_all	ATP synthase subunit beta [Nocardia asteroides]	gi%7c517875201 gi%7c549074034	52154	195	13	4	0.1	MTAAVTQDNATKAGATAGRVVRVIGPVVDVEFPRGAIPELFNALNADIKLASVAKTLTLEVAQHLGDNIVRTISMQPTDGLVRGATVTDSGKPISVPVGDIVKGHVFNALGDCLDSPGLGRDGEQWGIHRKPPSFDQLEGKTEMLETGVKVIDLLTPYVKGGKIGLFGGAGVGKTVLIQEMITRIAREFSGTSVFAGVGERTREGTDLHLEMEEMGVLQDTALVFGQMDEPPGTRMRVALSALTMAEYFRDVQHQDVLLFIDNIFRFTQAGSEVSTLLGRMPSAVGYQPTLADEMGELQERITSTRGRSITSLQAIYVPADDYTDPAPATTFAHLDATTELSRPISQKGIYPAVDPLTSTSRILEASIVGERHFRVANEVKRILQKYKELQDIIAILGM…	3.25	VIGPVVDVEFPR-TISMQPTDGLVR-IGLFGGAGVGK-FTQAGSEVSTLLGR-	#
tam504_all	ATP synthase F0F1 subunit beta [Nocardia farcinica IFM 10152]	gi%7c54023032 gi%7c499520955 gi%7c81823233 gi%7c54014540	52208	195	13	4	0.1	MTAAVTQDNTSRTGAAAGRVVRVIGPVVDVEFPRGAIPELFNALHADITLTSVAKTLTLEVAQHLGDNIVRTISMQPTDGLVRGATVTDTGKPISVPVGDVVKGHVFNALGDCLDTPGLGRDGEQWGIHRKPPSFDQLEGKTELLETGIKVIDLLTPYVKGGKIGLFGGAGVGKTVLIQEMITRIAREFSGTSVFAGVGERTREGTDLHLEMEEMGVLQDTALVFGQMDEPPGTRMRVALSALTMAEYFRDVQHQDVLLFIDNIFRFTQAGSEVSTLLGRMPSAVGYQPTLADEMGELQERITSTRGRSITSLQAIYVPADDYTDPAPATTFAHLDATTELSRPISQKGIYPAVDPLTSTSRILEASIVGDRHFAVANEVKRILQKYKELQDIIAILGM…	3.25	VIGPVVDVEFPR-TISMQPTDGLVR-IGLFGGAGVGK-FTQAGSEVSTLLGR-	#
tam504_all	nucleoside diphosphate kinase [Aspergillus oryzae RIB40]	gi%7c169776487 gi%7c238503193 gi%7c83771445 gi%7c220691640 gi%7c391870667	16999	186	64	3	0.22	MSDEQTFIAIKPDGVQRGLVGPIISRFENRGFKLAALKLCSPSKEHLEQHYADLSSKPFFPGLVSYMLSGPIVAMVWEGREVVKTGRTILGATNPLASAPGTIRGDFAIDVGRNVCHGSDSVENAKKEIALWFKPEELQKYKHSQFDWIYEKA	21.3333	GLVGPIISR-TILGATNPLASAPGTIR-GDFAIDVGR-	#
tam504_all	NDK_EMENI Nucleoside diphosphate kinase (NDK) (NDP kinase) (AnNDK) [Aspergillus nidulans FGSC A4]	gi%7c67902458 gi%7c40739682	17811	186	64	3	0.21	MPLLEPTKLTSHRSFIAIKPDGVQRGLVGPIISRFENRGFKLAAMKLTSPSRSLLEQHYSDLKEKPFFPGLVTYMLSGPIVAMVWEGKDVVKTGRTILGATNPLASAPGTIRGDFAIDVGRNVCHGSDSVESAKKEIGLWFTPEEIQNYKLNAFGWIYEKE	21.3333	GLVGPIISR-TILGATNPLASAPGTIR-GDFAIDVGR-	#
tam504_all	alkaline phosphatase [Streptosporangium roseum DSM 43021]	gi%7c271964716 gi%7c502653682 gi%7c270507891	56513	130	61	3	0.03	MEQKPSRRVFLSVAAAGAGGLLLTGAGRAPAVTPRALSRDPFTLGIASGDPSRDGFVLWTRLALDPLGPDGRGGMPARDVDVEWQLATDERFAEVVRTGTETARWERAHSVHVEPAGLEPGREYFYRFRAGGHLSPVGRTRTAPAALSPLTFAIAACAHYEHGYYTAYRRLAEQDPDLVVHLGDYMYEYAPRGYTALGGSVRRHTAGKCATLADYRVRHAQYKSDADLQAAHAVAPWLVAFDDHEIENNWAAGVSSSGAAGFARRRANAFQAYYENMPLRRASLPGGSSMRIHRRVDWGPLARFHLLDTRQFRDDQACEDGLRSGCDERLATGRTLLGEGQRRWLLDGLAASGARWNLVGQQILMAQRDSKVGPGTEVNMDSWDGYAAERARLLTGFRD…	20.3333	RANAFQAYYENMPLR-ANAFQAYYENMPLR-ANAFQAYYENMPLRR-	#
tam504_all	malate dehydrogenase_ mitochondrial precursor [Neurospora crassa OR74A]	gi%7c85090420 gi%7c28919768 gi%7c336470523 gi%7c350291576	35496	152	52	3	0.08	MFAASRIQTRAFSASARQLTKVSVLGAAGGIGQPLSLLLKLNPRVSELALYDIRGAPGVGADLSHINTKSTVKGYEPTASGLADALKGSEIVLIPAGVPRKPGMTRDDLFNTNASIVRDLAKACAESCPEANILVISNPVNSTVPIVSEIFKKAGVYNPKRLFGVTTLDVVRASRFVSEIKGTDPKDENITVVGGHSGVTIVPLFSQSKHPELSKNEQLIHRVQFGGDEVVKAKDGAGSATLSMAMAGARMAESLLRAAQGEKGVIEPTFVDSPLYKDQGIDFFASKVELGPNGVEKIYPVGPVDEVEQKLLDACLVDLKKNIQKGKDFVAANPGK	17.3333	VSELALYDIR-LFGVTTLDVVR-MAESLLR-	#
tam504_all	3-hydroxyacyl-CoA dehydrogenase [Brevundimonas diminuta]	gi%7c489258035 gi%7c328845914	30321	150	36	3	0.1	MFMQLKDRVAIVTGAGGGLGRCHALYLAGQGAKVVVNDLTEAAAQGVADEIVAAGGQAMAAGGSVTDVDAVQAMVEAAMKAWGRIDILINNAGILRDKSFSKMTLDDFRLVVDVHLMGAAICSKAVWEIMRAQTYGRIVMTTSSSGLYGNFGQANYGAAKLAQVGLMQTLAIEGAKHNIKVNALAPTAATQMTAGILSEEGLKALDPALVSPGLLALVGEAAPTRAILCAGSGHFATANITLTPGVRIGGGVDAGEQLIARWAEATNREGEIVPEFGFQQAAQEMASAGVTAPMAAG	12	VAIVTGAGGGLGR-IDILINNAGILR-MTLDDFR-	#
tam504_all	hypothetical protein [Nocardiopsis potens]	gi%7c516176306	74403	100	33	3	0.03	MPGSAPHRRSLPLAGPVGGGRTAATCRFRCGYACFHDAPNTSDNPYFGDVFSRMVSRRAALRTGAVGAGAAALGLGALGAPAAAAAAPAKGGKGKGNPRLKFDSLPPSTSDDVRVPKGYEHNVVIRWGDPVLPGAPEFDFENQTAEAQEKQFGYNCDYVAFRELSRDRGLLWVNHEYTNENLMFAGYTDGADIDPELIKVSMAAHGGSIVEIVREHKGGWRPSKGKRRFNRRITATTPMRIAGPAAGDALVRTEADPEGTEVLGMLNNCAGGMTPWGTILTCEENFNQYFVGGEGAPEEAKAALKRYGIAVSGDTREGNRRFDRVDERFDLSKHPTEANRFGWVVEIDPTDPEYKPRKRTMLGRIKHEGANTRLTEDGRVAVYMGDDERFDYIYKFVSK…	11	VAVYMGDDER-VAVYMGDDERFDYIYK-EPGQADEPNPR-	#
tam504_all	alkaline serine protease Pen c2 [Penicillium citrinum]	gi%7c4588118	48145	193	26	3	0.08	MKGFLGLALLPLLTAASPVSVESIHNGAAPIISSMNSQEIPDSYIVVFKKHVDTSAAAAHHSWVQDIHSAVNGRMELKKRGLFGFDTDAFLGVKHSFHVAGSLMGYAGHFHEDVIEQVRRHPDVDYIEKDSEVHHFDSPSVEKNAPWGLARISHRDSLSFGTFNKYLYAEDGGEGVDAYVIDTGTNTDHVDFEGRASWGKTIPQGDEDVDGNGHGTHCSGTIAGKKYGVAKKANVYAVKVLRSNGSGTMSDVVKGVEWAAEAHIKKSKAAKDGKAKGFKGSVANMSLGGGSSRTLDLAVNAAVDAGMHFAVAAGNDNADACNYSPAAAEKAVTVGASTLADERAYFSNYGKCTDIFAPGLNILSTWIGSKYAVNTISGTSMASPHIAGLLAYYVSLQPS…	8.66667	DSLSFGTFNK-GSVANMSLGGGSSR-AVTVGASTLADER-	#
tam504_all	sphingolipid long chain base-responsive protein PIL1 [Aspergillus terreus NIH2624]	gi%7c115390693 gi%7c114193775	38419	146	21	3	0.1	MHRTYSMRQTRMPTASQIENPPPPLSSTKANRWIGKGGFGHALRKNTAGAFGPDLARKLAQLVKMEKNVMRSMEMVAKERMETAQQLSIWGENCDEDVSDITDKIGVLLYEIGELEDLYVDRYDQYRVTIKSIRNIEASVQPSRDRKQKITDEIAKLKYRDPNSPRIVVLEQELVRAEAESLVAEAQLSNITREKLKAAFQYQFDALREHSEKVALIAGYGKHLLDLVDDTPVTPGETRAAYDGYDASKAIIQDCEEALANWVSSKAAVKSSMSTRTRTLSQRHRESLKSREGVDLSAQDQPMRGDRDSWVAADQHAASYQHEVEDGEEMDERREEPVGV	7	NIEASVQPSR-IVVLEQELVR-AEAESLVAEAQLSNITR-	#
tam504_all	cell wall integrity signaling protein Lsp1_ putative [Neosartorya fischeri NRRL 181]	gi%7c119468579 gi%7c119406022	38657	146	21	3	0.1	MHRTYSMRQSRVPTASQIENPPPPLSSTKTNRWLGKGGLGHAFRKNAAGAFGPDLARKLSQLVKMEKNVMRSMELVARERMEAAQQLSIWGENCDEDVSDVTDKLGVLLYEIGELEDLFVDRYDQYRVTIKSIRNIEASVQPSRDRKQKITDEIAKLKYKDPSSPRIVVLEQELVRAEAESLVAEAQLSNITREKLKAAFQYQFDALREHCEKVAIIAGYGKHLLDLVDDTPVTPGETRQAYDGYEASKAIIQDCEEALTNWVQSKAAVKPSLSTRSRSLSQRAREKNREGLDLSEQDQPMRGDRDSWVPAGQHPSYGEDGEEAASTVDGETRGREETREAVAAA	7	NIEASVQPSR-IVVLEQELVR-AEAESLVAEAQLSNITR-	#
tam504_all	sphingolipid long chain base-responsive protein PIL1 [Aspergillus niger CBS 513.88]	gi%7c145238632 gi%7c134076457 gi%7c350635910	39351	146	21	3	0.1	MHRTYSMRQSRLPTASQIENPPPPLSSTKTNRIFGKGGFGHALRKNTAGAFGPDLARKLSQLVKMEKNVMRSMEMVSRERMETAQQLSIWGENCDEDVSDVTDKLGVLLYEIGELEDLFVDRYDQYRVTIKSIRNIEASVQPSRDRKQKITDEIAKLKYKDPNSPRIVVLEQELVRAEAESLVAEAQLSNITREKLKAAFQYQFDALREHCEKVALIAGYGKHLLDLVDDTPVTPGETRHAYDGYDASKAIIQDCEEALANWVTSKASVKPTLSQRSRTLSQRHRETLKGREGVDLSGQDQPMGRDSWVPADQHATYQHEVEDGEEVASTVDGESRGREEEREPVTVSV	7	NIEASVQPSR-IVVLEQELVR-AEAESLVAEAQLSNITR-	#
tam504_all	hypothetical protein [Podospora anserina S mat+]	gi%7c171687393 gi%7c170943658	39833	146	21	3	0.1	MRATRAPTASQIQNPPPPPSTTKSGRFFKGGLGALGHALRGKTAGAFGPDLAKKLAQLVKMEKNVMRSLELVAKERMEVAQQLSIWGEACDEDVSDVTDKLGVLLYEIGELEDQYVDRYDQYRVTMKSIRNIEASVQPSRDRKQKITDQIAQLKYKEPNSPRIVVLEQELVRAEAESLVAEAQLSNITREKIKAAYTYQFDALREHCEKVAIIAGYGKHLLELIDDTPVTPGETRAAYDGYEASKAIIQDCEDALTNWVTQKAAVSAKLSTRARTLSTRRRNNIKARSEGLDLSGQDAPLNDQDGWVPAGHHQHHKDEYSEDEDEDEDELEGRTSHSVLGSEAGLNGGETRGRSQEAVVA	7	NIEASVQPSR-IVVLEQELVR-AEAESLVAEAQLSNITR-	#
tam504_all	meiotic expression up-regulated protein 14 [Pyrenophora tritici-repentis Pt-1C-BFP]	gi%7c189202420 gi%7c187984645	39270	146	21	3	0.1	MHRTYSMRQSRAPTASQIQSPPPPASSTKSGRFFGKANIGHTFRHKSAGAFGPDLAKKLSQLVKMEKNVMRSMELVSRERMEVAQQLSIWGEACDDDVSDVTDKLGVLIYEIGELEDQYVDRYDQYRVTIKSIRNIEASVQPSRDRKQKITDQIAQLKYKEPNSPKIVVLEQELVRAEAESLVAEAQLSNITREKLKAAFTYQFDAMREHCEKLAIIAGYGKHLLELVDDTPVTPGETRQAYDGYEASKAIIQDCEDALTNWVSQNASVSAKLSQRSRTLSQRRRNRNHSEGVDLSGQDQALDRESGLWIPASEHHGNGYQGEELDDDINSTIASEHQRGREDERIVAA	7	NIEASVQPSR-IVVLEQELVR-AEAESLVAEAQLSNITR-	#
tam504_all	cell wall integrity signaling protein Lsp1/Pil1_ putative [Talaromyces marneffei ATCC 18224]	gi%7c212540872 gi%7c210067890	39282	146	21	3	0.1	MHRTYSMRQSRAPTASQIENPPPPPSSTKSGRLFGRNNFGHAFRKNAAGAFGPDLAKKLSQLVKMEKNVMRSMELVGRERMEVAQQLSIWGEAGDDDVSDVTDKLGVLIYEIGELEDQFVDRYDQYRLTIKSIRNIEASVQPSRDRKQKITDEIAKLKYKDPNSPRIVVLEQELVRAEAESLVAEAQLSNITREKLKAAFTYQFDALREHCEKIAIIAGYGKHLLELIDDTPVTPGETRQAYDGYDASKAIIQDCEDALTNWVTSEAAVHSNLSTRSRTLSQRRRNNIKRGVEDGDELKDQDSWVAAHQHAGYHEDDVSEDGIPEDDGSIAHSGANGEIRGRAEEREPVAA	7	NIEASVQPSR-IVVLEQELVR-AEAESLVAEAQLSNITR-	#
tam504_all	hypothetical protein AN5217.2 [Aspergillus nidulans FGSC A4]	gi%7c67538094 gi%7c40743208 gi%7c259484676	39251	146	21	3	0.1	MHRTYSMRQSRLPTASQIENPPPPLSSTKTNRWMGKGGLGHAFRKNAAGAFGPDLARKLSQLVKMEKNVMRSMELVSRERMETAQQLSIWGENCDEDVSDITDKLGVLLYEVGELEDMYVDRYDQYRVTIKSIRNIEASVQPSRDRKQKITDEIAKLKYKDPNSPRIVVLEQELVRAEAESLVAEAQLSNITREKLKAAFQYQFDALREHCEKVAIIAGYGKHLLDLIDDTPVTPGETRQAYDGYDASKAIIQDCEDALANWVSSKAAVKSSLSQRSRTLSQRRQDNINKGRENGVDLSSQDQPLRGDRDSWVAAEQHPSYHHDDDEEAASDGDIRGREEEREPVPV	7	NIEASVQPSR-IVVLEQELVR-AEAESLVAEAQLSNITR-	#
tam504_all	cell wall integrity signaling protein Lsp1/Pil1 [Aspergillus fumigatus Af293]	gi%7c70991589 gi%7c66848276 gi%7c159124203	39112	146	21	3	0.1	MHRTYSMRQSRVPTASQIENPPPPLSSTKTNRWLGKGGLVVVIGHAFRKNAAGAFGPDLARKLSQLVKMEKNVMRSMEMVARERMEAAQQLSIWGENCDEDVSDVTDKLGVLLYEIGELEDLFVDRYDQYRVTIKSIRNIEASVQPSRDRKQKITDEIAKLKYKDPNSPRIVVLEQELVRAEAESLVAEAQLSNITREKLKAAFQYQFDALREHCEKVAIIAGYGKHLLDLVDDTPVTPGETRQAYDGYEASKAIIQDCEEALTNWVQSKAAVKPSLSTRSRSLSQRAREKNREGLDLSEQDQPMRGDRDSWVPAGQHPSYGEDGEEAASTVDGETRGREETREAVAAA	7	NIEASVQPSR-IVVLEQELVR-AEAESLVAEAQLSNITR-	#
tam504_all	sphingolipid long chain base-responsive protein LSP1 [Neurospora crassa OR74A]	gi%7c85116372 gi%7c336463195	44009	146	21	3	0.09	MHRTYSMRASRAPTASQIQNPPPPPSSTKSGRLFGRGGIGGLGHALRRNAAGAFGPDLAKKLSQLVKMEKNVMRSLEMVAKERMEVAQQLSLWGEACDEDVSDVTDKLGVLLYEIGELEDQYVDRYDQYRVTMKSIRNIEASVQPSRDSRSTLLLLLSQLLSLFTTNTPRGKQKITDQIAQLKYKEPNSPRIVVLEQELVRAEAESLVAEAQLSNITREKIKAAYTYQFDALREHCEKVAIIAGYGKHLLELIDDTPVTPGETRPAYDGYEASKAIIQDCEDSLTNWVTQNAAVSAKLSTRSRTLSQRRRNNIKARTEGGAGQGHDLSGQDAPLNDRDSWVPANQHKEVADYEVSEEEEDDDEDEEDDIHASGSHSMLDGESEQHQRGRNTEPVAA	7	NIEASVQPSR-IVVLEQELVR-AEAESLVAEAQLSNITR-	#
tam504_all	aspartyl aminopeptidase [Neosartorya fischeri NRRL 181]	gi%7c119498757 gi%7c119414300	56130	106	20	3	0.07	MTKKSVFDLRDSNMAYRLSGQLPDPTPVYAPSTAPSQTTTTTTSFSPADYAQPYCDFMTAHPTIFHAVDGFTKELESKGYKRLPEREVWTSKLQRGGKYYCTRNGSAFIAFSVGKDYRSGNGLAIVAGHIDALTTRLKPVSKLPTKAGFVQLGVAPYAGGLNETWWDRDLSIGGRVLVRDPTSGKVESKLVKLDWPIARIPTLAPHFGAPSQGPFNKETQMVPIVGIDNSDLFQQQVSPTAHSSSGIKPGSFAATQPERLVKIISKELGITDYDTILSWELELYDSQPARLGGLEKDLIFAGRIDDKLCCYAAQQALLASSDDTSTGSIKMVGMFDDEEIGSLLRQGARSNFMSSVIERITEAFASSNYGPNLLSQTVANSFFVSSDVIHAVNPNFLNV…	6.66667	SNFMSSVIER-AIDVGIPQLSMHSIR-ATTGSLDPGLGVK-	#
tam504_all	vacuolar aspartyl aminopeptidase Lap4_ putative [Aspergillus clavatus NRRL 1]	gi%7c121718212 gi%7c119404332	54883	106	20	3	0.07	MAYRLSGQFPEPTPSYPSSTASRPAEQSKPAAFSPEDYAQPYCNFMTAYPTIFHAVDGFTKELESKGYKHLPEREAWTSKLQRGGKYYVTRNGSAFIAFSIGKEYESGNGLAIVAGHIDALTAKLKPVSKLPNKAGFVQLGVAPYAGALNETWWDRDLSIGGRVLVKDRDSGKVESKLVKLDWPIARIPTLAPHFGAPSQGPFNKETQMVPIVGIDNSDLFQHQVSASASSDNGIKPGSFAATQPERLVKIIAKELGITDYDTILNWELELYDSQPARLGGLEKDLIFAGRVDDKLCCYAAQQALLASPDSTSPASIKMVGMFDDEEIGSLLRQGARSNFMSSVIERITEAFASSNYGPNLLSQTVANSFFVSSDVIHAVNPNFLNVYLENHAPRLNVG…	6.66667	SNFMSSVIER-AIDVGIPQLSMHSIR-ATTGSLDPGLGVK-	#
tam504_all	vacuolar aspartyl aminopeptidase Lap4 [Aspergillus fumigatus Af293]	gi%7c70984878 gi%7c66845573 gi%7c159126129	55989	106	20	3	0.07	MTKKSVFDLHDSNMAYRLSGQLRGPTTPVCAPSTAPSQTTTTTSFSPADYAQPFCDFMTAHPTIFHAVDGFTKELESKGYKRLPEREAWTSKLQRGGKYYCTRNGSAFIAFSVGKNYQSGNGLAIVAGHIDALTARLKPVSKLPTKAGFVQLGVAPYAGGLNETWWDRDLSIGGRVLVRDPTSGKVESKLVKLDWPIARIPTLAPHFGAPSQGPFNKETQMVPIVGIDNSDLFQQQVSPTAHSSSGIKPGSFAATQPERLVKIISKELGITDYDTILSWELELYDSQPARLGGLEKDLIFAGRIDDKLCCYAAQQALLASSDDTSTGSIKMVGMFDDEEIGSLLRQGARSNFMSSVIERITEAFASSNYGPNLLSQTVANSFFVSSDVIHAVNPNFLNV…	6.66667	SNFMSSVIER-AIDVGIPQLSMHSIR-ATTGSLDPGLGVK-	#
tam504_all	unnamed protein product [Aspergillus oryzae RIB40]	gi%7c83771484 gi%7c391874440	59001	106	20	3	0.07	MKPHELSQDKVFVSAFVTEPSEVHVQIGPAFDMTKRSVLDLRDSAMAYRLSAQLPEPSPATIATPVARSGPFAPEDYTKPYCEFMTANPTIFHAVDGFTRQLESQGYKRLPERETWNSKLEKGGKYYVTRNGSAFISFSIGRDYKSGNGMAIVAGHIDALTAKLKPVSKLPNKAGFSQLGVAPYAGALSDTWWDRDLSIGGRVLVQDSNTGKVESKLVKLDWPIARIPTLAPHFGAPSQGPFNKETQMVPIIGVDNSDLFQQQAPSKIDQDNGIKPGTFAATQPEKLVKVISKELGITDYSSIISWELELYDSQPAQVGGLDKDLIFAGRIDDKLCCYAAQEALLASSDSTSTSSIKMVGMFDDEEIGSLLRQGARSNFMSSVIERITEAFSPNYGPNV…	6.66667	SNFMSSVIER-AIDVGIPQLSMHSIR-ATTGSLDPGLGVK-	#
tam504_all	S-adenosylmethionine synthase [Nocardiopsis baichengensis]	gi%7c516127220	42865	131	14	3	0.09	MSRRLFTSESVTEGHPDKMADQISDAILDAMLKDDPASRVAVETLITTGQVHIAGEVTTKTYVDIPDIVRKKILEIGYDSSAKGFDGDSCGVSVSIDQQSPDIAQGVDTAYEARVENEEDKLASQGAGDQGLMFGYANRETPELMPLPIKLSHALSQRLSAVRHDGTVPYLRPDGKTQVTVEYEGTTPVRLDTVVLSSQHAPDIDMNELLTPDIKEHVIEPIVKQYGLEADDYRLLVNPTGRFEIGGPMGDAGLTGRKIIVDTYGGYARHGGGAFSGKDPSKVDRSAAYATRWVAKNIVAAGLAERAEVQVAYAIGKAAPVGVFIETFGTEQVAPDVIEKAVREVFDLRPAAIVRDLNLLRPIYSATAAYGHFGREVPEFTWESTERAEALKSAVGA	4.66667	FEIGGPMGDAGLTGR-IIVDTYGGYAR-NIVAAGLAER-	#
tam504_all	3-ketoacyl-ACP reductase [Nocardia cyriacigeorgica GUH-2]	gi%7c379711498 gi%7c504119531 gi%7c374848997	46149	120	10	3	0.06	MAAKSKGAPNLYGSFVHSAPGAFLASKLGLPQPETLRRYVKGEPALPGPVLLGGKGRVAEPIRALLTDYTFADAPSQGTKYGALVFDATGIGSIEDLSQLFEFFQPAMRSIAASGRVVVIGTTPELASSVDEQIAQRALEGFTRSVAKELLRGATAQLVYLHPEASAAATGLESTLRFLLSAKSAFVDGQVIRVGKDDAVAPASWDRPLEGKVAVVTGAARGIGATIAEVFARDGAQVIVADIPAAGEALSETANKVGGTALALDVTAPDAAQKLAEFATERFGGIDIIVHNAGITRDKLLANMDEGRWNSVINVNLAAPHRITEGLVASGALRAGGRVIDVSSIAGIAGNRGQTNYGASKAGVIGMVNAEAPKLAEKGITINAVAPGFIETAMTAAIP…	3.33333	ALEGFTR-SAFVDGQVIR-GIGATIAEVFAR-	#
tam504_all	3-ketoacyl-ACP reductase [Nocardia farcinica IFM 10152]	gi%7c54027435 gi%7c499525355 gi%7c54018943	46335	120	10	3	0.06	MAAKSKGAPNLYGSFVHSAPGQFLASKLGLPQPETLRRYTPGEPALPGPVLLGGKGRVAEPVRALLSDYTFADSLTQGTKYGALVFDATGIGSIEDLAQLYEFFQPAMRSIAASGRLVVIGTTPELAASVEEQIAQRALEGFTRSVGKELLRGATAQLVYLHPDASPSATGLESTLRFLLSAKSAFVDGQVIRVGKDDSAAPADWARPLEGKVAVVTGAARGIGATIAEVFARDGAKVIVADIPAAGDALSETANKVGGTALALDVTAPDAAEKLAEFVTERFGGLDIIVHNAGITRDKLLANMDDARWNAVINVNLAAPHRITEALVAKGVLKEGGRVIDVSSIAGIAGNRGQTNYGASKAGVIGMVQAEAPKLAEKGITINAVAPGFIETAMTAAIP…	3.33333	ALEGFTR-SAFVDGQVIR-GIGATIAEVFAR-	#
tam504_all	heat shock protein 90 [Monascus pilosus]	gi%7c115490911	80331	101	8	3	0.04	MSSETFEFQAEISQLLSLIINTVYSNKEIFLRELISNASDALDKIRYESLSDPSKLDSCKDLRIDIIPDKESKTLTIRDTGIGMTKADLINNLGTIARSGTKQFMEALTAGADISMIGQFGVGFYSAYLVADKVTFISKHNDDEQYVWESAAGGTFTLTQDTEGEPLGRGSKIILHLKDEQLDYLNESRIKEVVRKHSEFISYPIYLHVLKETEKEVPLEEEEEKKEEDDEKKPKIEEVDEEDEEKKEKKTKKITETKIEEEELNKTKPIWTRNPADITQEEYAAFYKSLSNDWEDHLAVKHFSVEGQLEFRAILFVPKRAPFDLFETKKTKNNIKLYVRRVFITDDATDLIPEWLGFIKGVVDSEDLPLNLSRETLQQNKIMKVIKKNIVKKTLELFN…	2.66667	AILFVPK-GVVDSEDLPLNLSR-TGQFGWSANMER-	#
tam504_all	heat shock protein hsp1 [Coccidioides immitis RS]	gi%7c119189363 gi%7c392868187	80048	101	8	3	0.04	MASETFEFQAEISQLLSLIINTVYSNKEIFLRELISNCSDALDKIRYEALSDPSKLDANKDLRIDIIPDKESKTLTIRDTGIGMTKADLVNNLGTIARSGTKQFVEALTAGADISMIGQFGVGFYSAYLVADKVTVVSKHNDDEQYIWESSAGGTFTLTQDVDGEPLGRGTKIILHLKDEQTDYLNESRIKEVVKKHSEFISYPIYLHVLKETEKEVPDEDEEETKAEEDDKKEAKIEELDDEEEEKKAKKTKKIKESKIEEEELNKTKPIWTRNPADITQEEYGSFYKTLSNDWEDHLAVKHFSVEGQLEFRAILFVPKRAPFDLFETKKTKNNIKLYVRRVFITDDATDLIPEWLGFIKGVVDSEDLPLNLSRETLQQNKIMKVIKKNIVKKSLELF…	2.66667	AILFVPK-GVVDSEDLPLNLSR-TGQFGWSANMER-	#
tam504_all	ATP-dependent molecular chaperone HSC82 [Ajellomyces capsulatus NAm1]	gi%7c154280066 gi%7c150412789	79945	101	8	3	0.04	MSSETFEFQAEISQLLSLIINTVYSNKEIFLRELISNCSDALDKIRYEALSDPSKLDSNKDLRIDIIPDKENKTLTISDTGIGMTKADLVNNLGTIARSGTKQFMEALTAGADISMIGQFGVGFYSAYLVADKVTVISKHNDDEQYMWESSAGGTFKITQDTDGEPLGRGTKMILHLKDEQTEYLNESKIKEVVKKHSEFISYPIYLHVLKETEKEVPDEDAEEVKDEGDDKAPKVEEVDDDEEDKTKEKKTKKIKETKIEEEELNKTKPIWTRNPADITQEEYASFYKTLSNDWEDHLAVKHFSVEGQLEFRAILFVPKRAPFDLFETKKTKNNIKLYVRRVFITDDATDLIPEWLSFIKGVVDSEDLPLNLSRETLQQNKIMKVIKKNIVKKTLELF…	2.66667	AILFVPK-GVVDSEDLPLNLSR-TGQFGWSANMER-	#
tam504_all	Pc12g05640 [Penicillium chrysogenum Wisconsin 54-1255]	gi%7c255931703 gi%7c211582027	79487	101	8	3	0.04	MSETFEFQAEISQLLSLIINTVYSNKEIFLRELISNASDALDKIRYEALSDPSKLDSNKDLRIDIIPDLENKTLTIRDTGIGMTKADLINNLGTIARSGTKQFMEALSAGADISMIGQFGVGFYSAYLVADRVTFVSKHNDDEQYIWESAAGGTFTLKEDTEGEQLGRGSKIILHLKDEQMDYLNEARIKEVVRKHSEFISYPIYLHVLKETETEVPDEEAEETKEEDDEKKPKVEEVDEEEEKKEKKTKTVKESKIEEEELNKTKPIWTRNPADITTEEYASFYKSLSNDWEDHLGVKHFSVEGQLEFRAILFVPKRAPFDLFETKKTKNNIKLYVRRVFITDDATDLIPEWLSFVKGVVDSEDLPLNLSRETLQQNKIMKVIKKNIVKKTLELFVEI…	2.66667	AILFVPK-GVVDSEDLPLNLSR-TGQFGWSANMER-	#
tam504_all	predicted protein [Nectria haematococca mpVI 77-13-4]	gi%7c302897479 gi%7c256728549	79628	101	8	3	0.04	MAETFEFQAEISQLLSLIINTVYSNKEIFLREIVSNASDALDKIRYKALSDPSQLDSGKDLRIDIIPDKANKTLTIRDTGIGMTKADLVNNLGTIARSGTKQFMEALTAGADVSMIGQFGVGFYSAYLVADQVRVISKNNDDEQYVWESSAGGTFSITADTEGEQLGRGTSIILHLKDEQTEYLNESKIKEVIKKHSEFISYPIYLHVEKETEKEVPDEDAEVEEVTEEGDDKKPKIEEVDDEEEGKEKKPKTKKIKETKIEEEELNKQKPIWTRNPQDITQEEYASFYKSLSNDWEDHLAVKHFSVEGQLEFRAILFVPKRAPFDLFETKKTKNNIKLYVRRVFITDDATDLIPEWLGFVKGVVDSEDLPLNLSRETLQQNKIMKVIKKNIVKKSLEL…	2.66667	AILFVPK-GVVDSEDLPLNLSR-TGQFGWSANMER-	#
tam504_all	hypothetical protein THITE_2153075 [Thielavia terrestris NRRL 8126]	gi%7c367038329 gi%7c346996806	79436	101	8	3	0.04	MAETFEFQAEISQLLSLIINTVYSNKEIFLRELVSNASDALDKIRYEALSDPSKLDTGKDLRIDIIPDKENKTLTIRDTGIGMTKADLVNNLGTIARSGTKQFMEALSAGADVSMIGQFGVGFYSAYLVADKVTVVSKNNDDEQYIWESSAGGTFNIIPDTDGEPLGRGTKIILHLKDEQTDYLNESRIKEVIKKHSEFISYPIYLHVKKETEKEVPDEEAETVEEGEDKKPKIEEVDEEEENKEKKPKTKKVKETKIEEEELNKQKPIWTRNPQDITQEEYASFYKSLSNDWEDHLAVKHFSVEGQLEFRAILFVPKRAPFDLFETKKTKNNIKLYVRRVFITDDATDLIPEWLGFIKGVVDSEDLPLNLSRETLQQNKIMKVIKKNIVKKSLELFNE…	2.66667	AILFVPK-GVVDSEDLPLNLSR-TGQFGWSANMER-	#
tam504_all	Heat shock protein 90 [Penicillium digitatum Pd1]	gi%7c425773509 gi%7c425775805	79513	101	8	3	0.04	MSETFEFQAEISQLLSLIINTVYSNKEIFLRELISNASDALDKIRYEALSDPSKLDSNKDLRIDIIPDLENKTLTIRDTGIGMTKADLINNLGTIARSGTKQFMEALSAGADISMIGQFGVGFYSAYLVADRVTFVSKHNDDEQYIWESAAGGTFTLKEDTEGEQLGRGSKIILHLKDEQMDYLNEARIKEVVRKHSEFISYPIYLHVLKETETEVPDEEAEEIKEDDEKKPKVEEVDDEEEEKKEKKTKTVKESKIEEEELNKTKPIWTRNPADITTEEYASFYKSLSNDWEDHLGVKHFSVEGQLEFRAILFVPKRAPFDLFETKKTKNNIKLYVRRVFITDDATDLIPEWLSFVKGVVDSEDLPLNLSRETLQQNKIMKVIKKNIVKKILELFVEI…	2.66667	AILFVPK-GVVDSEDLPLNLSR-TGQFGWSANMER-	#
tam504_all	hypothetical protein [Kluyveromyces lactis NRRL Y-1140]	gi%7c50307323 gi%7c49642774	81579	101	8	3	0.04	MVNQETYEFQAEITQLMSLIINTVYSNKEIFLRELISNASDALDKIRYQSLSDPKVLETEPELFIRITPRPEEKVLEIRDSGIGMTKAELINNLGTIAKSGTKAFMEALSAGADVSMIGQFGVGFYSLFLVADRVQVISKHNDDEQYIWESNAGGSFTVTLDESNERIGRGTVLRLFLKEDQLEYLEEKRIKDVVKKHSEFVAYPIQLLVTKEVEKDVPVAEEEEEVKEEKKEGEEEEDDKKPKLEEIDEDEEKKDDEQKTKKVKETVKELEELNKTKPLWTKNPSEVTQEEYNAFYKSISNDWEDPLAVKHFSVEGQLEFKAILFVPKRAAFDLFESKKKKTNIKLYVRRVFITDEAEELIPEWLSFVKGVVDSEDLPLNLSREMLQQNKIMKVIKKN…	2.66667	AILFVPK-GVVDSEDLPLNLSR-TGQFGWSANMER-	#
tam504_all	heat shock protein 90 [Paracoccidioides brasiliensis]	gi%7c60656557	80207	101	8	3	0.04	MASETFEFQAEISQLLSLIINTVYSNKEIFLRELISNCSDALDKIRYEALSDPGKLDSNKDLRIDIIPDKTNKTLTIQDTGIGMTKADLVNNLGTIARSGTKQFMEALTAGADISMIGQFGVGFYSAYLVADKVTVISKHNDDEQYIWESSAGGTFKITQDTDGESLGRGTKMILHLKDEQTEYLNESKIKEVVKKHSEFISYPIYLHVVKEVEKEVVDEDAEEVKDEDEDKAPKVEEVDDEEEEKKKEKKTKKIKESKIEEEELNKTKPIWTRNPADITQEEYASFYKTLSNDWEDHLAVKHFSVEGQLEFRAILFVPKRAPFDLFETKKTKNNIKLYVRRVFITDDATDLIPEWLSFIKGVVDSEDLPLNLSRETLQQNKIMKVIKKNIVKKTLELF…	2.66667	AILFVPK-GVVDSEDLPLNLSR-TGQFGWSANMER-	#
tam504_all	heat shock protein 80 [Neurospora crassa]	gi%7c6979704	78860	101	8	3	0.04	MATAETFEFQAEISQLLSLIINTVYSNKEIFLRELISNASDALDKIRYEVPCSDPSKPGLLQDHSSIDIIPDKANKTLTIRDTGIGMTKADLVNNLGTIARSGTKQFMEALTAGADISMIGQFGVGFYSAYLVADRVTVVSKHNDDEQYIWESSAGGTFTIRPDTEGEPLAKIILHLKEEQLDYLNESRIKEVVKKHSEFISYPIYLHVQISQEVTEEGDDKNPKIEEVDEEEEEKKKRRRSRTIKETRSEEEELNKQKPIWTRNPQDITQEEYAAFYKSLSNDWEDHLAVKHFSVEGQLEFRAILFVPKRAPFDLFETKKTKSNIKLYVRRVFITEHATDLVPEWLSFIKGVVDSEDLPLNLSRETLQQNKIMKVIKKNIVKKSIELFNEIAEDKEQF…	2.66667	AILFVPK-GVVDSEDLPLNLSR-TGQFGWSANMER-	#
tam504_all	heat shock protein 90_ partial [Candida tropicalis]	gi%7c7549229	78939	101	8	3	0.04	IINTVYSNKEIFLRELISNASDALDKIRYQALSDPSQLESEPELFIRITPHKDQKVLEIRDSGIGMTKADLVNNLGTIAKSGTKSFMEALSAGADVSMIGQFGVGFYSLFLVADHVQVVSKHNDDEQYIWESNAGGKFTVTLDETNERLGRGTMLRLFLKEDQLEYLEEKRIIEVVKKHSEFVAYPIQLVVTKEVEKEVPEEETLAEDEDKATGEDDKKPKLEEVKDEEEETKEKKTKKIKEEVTETEELNKTKPLWTRNPSDITQEEYNAFYKSISNDWEDPLAVKHFSVEGQLEFRAILFVPKRAPFDAFESKKKKSNSKLYVRRVFITDDAEELIPEWLSFVKGVVDSEDLPLNLSREMLQQNKILKVIRKNISKKMIETFNEISEDQEQFNQFYT…	2.66667	AILFVPK-GVVDSEDLPLNLSR-TGQFGWSANMER-	#
tam504_all	histone H4 [Coccidioides immitis RS]	gi%7c119186679 gi%7c303317590 gi%7c240108478 gi%7c320038790 gi%7c392870667	11393	112	138	2	0.17	MTGRGKGGKGLGKGGAKRHRKILRDNIQGITKPAIRRLARRGGVKRISAMIYEETRSVLKTFLEGVIRDAVTYTEHAKRKTVTSLDVVYALKRQGRTLYGFGG	69	ISAMIYEETR-TFLEGVIR-	#
tam504_all	Pc16g12260 [Penicillium chrysogenum Wisconsin 54-1255]	gi%7c255941512 gi%7c211586148	14715	112	138	2	0.13	MGHGKVGVPTLGSPVTTPHFHFFNKKRVLTRLISGGKGGKGLGKGGAKRHRKILRDNIQGITKPAIRRLARRGGVKRISAMIYEETRGVLKTFLEGVIRDAVTYTEHAKRKTVTSLDVVYALKRQGRTLYGFGG	69	ISAMIYEETR-TFLEGVIR-	#
tam504_all	histone H4.1 [Uncinocarpus reesii 1704]	gi%7c258563390 gi%7c237907947	11379	112	138	2	0.17	MSGRGKGGKGLGKGGAKRHRKILRDNIQGITKPAIRRLARRGGVKRISAMIYEETRSVLKTFLEGVIRDAVTYTEHAKRKTVTSLDVVYALKRQGRTLYGFGG	69	ISAMIYEETR-TFLEGVIR-	#
tam504_all	histone H4 [Nectria haematococca mpVI 77-13-4]	gi%7c302901592 gi%7c302903065 gi%7c256729403 gi%7c256729711 gi%7c451992119 gi%7c452004566 gi%7c452981243 gi%7c477587432	10079	112	138	2	0.2	GAKRHRKILRDNIQGITKPAIRRLARRGGVKRISAMIYEETRGVLKTFLEGVIRDAVTYTEHAKRKTVTSLDVVYALKRQGRTLYGFGG	69	ISAMIYEETR-TFLEGVIR-	#
tam504_all	histone H4.1 [Beauveria bassiana ARSEF 2860]	gi%7c400593007 gi%7c400601590	11420	112	138	2	0.17	MTGRGKGGKGLGKGGAKRHRKILRDNIQGITKPAIRRLARRGGVKRISAMIYEETRNVLKTFLEGVIRDAVTYTEHAKRKTVTSLDVVYALKRQGRTLYGFGG	69	ISAMIYEETR-TFLEGVIR-	#
tam504_all	hypothetical protein FG04289.1 [Fusarium graminearum PH-1]	gi%7c46116894	9150	112	138	2	0.22	MRDNIQGITKPAIRRLARRGGVKRISAMIYEETRGVLKTFLEGVIRDAVTYTEHAKRKTVTSLDVVYALKRQGRTLYGFGG	69	ISAMIYEETR-TFLEGVIR-	#
tam504_all	histone H4 [Mammuthus primigenius]	gi%7c50542237 gi%7c50542243 gi%7c50542249	4890	112	138	2	0.41	KPAIRRLARRGGVKRISAMIYEETRGVLKTFLEGVIRDAVTYT	69	ISAMIYEETR-TFLEGVIR-	#
tam504_all	H4_NEUCR Histone H4 [Aspergillus nidulans FGSC A4]	gi%7c67516905 gi%7c40746220	10510	112	138	2	0.19	MSGRGAKRHRKILRDNIQGITKPAIRRLARRGGVKRISAMIYEETRGVLKTFLEGVIRDAVTYTEHAKRKTVTSLDVVYALKRQGRTLYGFGG	69	ISAMIYEETR-TFLEGVIR-	#
tam504_all	extracellular lipase_ putative [Aspergillus flavus NRRL3357]	gi%7c238507487 gi%7c220689658	61947	132	84	2	0.04	MLIKATNMILKPTLLFLLSLPTALAAPAKRDSPTVTISSPSATIVGSSGNVESFNGIPFAQQPTGSLRLKPPQALESPLGTFKATGAAKACPQFFFTTDTSQFPSSVLGQLINIPLFQKITNAGEDCLTLNVRRPAGTTPESKLPVLVWIFGGGFELGSSAMYDGAPLVSSSIDLDMPIVFVAINYRVGGFGFLPGKEILEDGSANLGLRDQRLALEWIADNIEAFGGDPEKVTIWGESAGSISVFDQMMLYDGDHTYKGKPLFHGAIMNSGSAVPADPVDGVKGQAVYDAVVASAGCSDASNTLQCLRALDYTDYLNAANSVPGILSYHSVALSYLPRPDGKVLTDSPEVLGKAGKYASVPFIIGDQEDEGTIFALFQANITTTDDLVDYLSKYFFYG…	42	VGGFGFLPGK-LAAILGDLTFTLTR-	#
tam504_all	unnamed protein product [Aspergillus oryzae RIB40]	gi%7c83776443	61779	132	84	2	0.04	MVDPLSQGLNAHLTLSFVSSHRTGSSGQEGLPTVTISSPSATIVGSSGNVESFNGIPFAQQPTGSLRLKPPQALESPLGTFKATGAAKACPQFFFTTDTSQFPSSVLGQLINIPLFQKITNAGEDCLTLNVRRPAGTTPESKLPVLVWIFGGGFELGSSAMYDGAPLVSSSIDLDMPIVFVAINYRVGGFGFLPGKEILEDGSANLGLRDQRLALEWIADNIEAFGGDPEKVTIWGESAGSISVFDQMMLYDGDHTYKGKPLFHGAIMNSGSAVPADPVDGVKGQAVYDAVVASAGCSDASNTLQCLRELDYTDYLNAANSVPGILSYHSVALSYLPRPDGKVLTDSPEVLGKAGKYASVPFIIGDQEDEGTIFALFQANITTTDDLVDYLSKYFFYGA…	42	VGGFGFLPGK-LAAILGDLTFTLTR-	#
tam504_all	alkaline phosphatase [Streptomyces flavogriseus ATCC 33331]	gi%7c357414281 gi%7c503923115 gi%7c320011650	58367	107	71	2	0.03	MFANSVSRRQMFGFGGAAAAALMLGTGAWEAQSAFAAPALKGDPFTLGVASGDPTSDGVVLWTRLAPDPFAQDGLGGMPAKPVRVHYEVALDERFRRIARRGSVVATPELAHSVHPEVHGLAPDRTYWFRFRAGSAISPVGRTRTTPAPWQSPRELKFAFASCQAWQDGYFTAYHHMAREDLDLVVHLGDYLYESGVRTNKRGVTTDPKFHTETVGLARYRLQYGLYKSEAPLREAHAAFPWIMTFDDHEVENNWADETSENDEDPKTFLLRRAAAFQALYEHAPLRRTQLPNGPDVQMYRRLPYGRLADFTMLDTRQYRDDQACGDGTSADCADRFDDNRTLLGSRQRDWVLKGFSRSQARWQILGNQAPMGQTDQDPGPGTTVWTDPWDGYVAERNR…	35.5	LADFTMLDTR-NLVVVTGDR-	#
tam504_all	60S ribosomal protein L9 [Talaromyces marneffei ATCC 18224]	gi%7c212543187 gi%7c210066655	21684	85	51	2	0.1	MRYLHSEETLPIPENVTINIRSRIVTVEGPRGKLTKDLSHISVSFGRPDKNTISIELHHGARKGIATLRTVRTLINNLIIGVTRGFLYKMRYVYAHFPINVNIEKNGETGNYEVEIRNFLGEKIVRRITAQAGVEVITSPNVKDELQLSGNSLEAVSQSAADIQQICRVRNKDIRKFLDGLYVSERTNIVVE	25.5	IVTVEGPR-TLINNLIIGVTR-	#
tam504_all	phosphoesterase superfamily protein [Talaromyces stipitatus ATCC 10500]	gi%7c242817240 gi%7c218713380	50095	128	39	2	0.05	MRPGILVGLLAFAAITAGFPNKRTGLPASKSSIQNLKSKIKNVVILVMENRSFDNLLGGQKLFGLDNPIQHGPFCNPYNVSDPAEGMVCSAARDYDSITDDPDHAVYGNNFEFYSTFTPDNAAIESGQLIPNQNGFIHEQLRLYSSEANRTELATQVMNYYTEEQVPVLTTLVHNFLTFNHWHSDIPGPTNPNRAAIVSGTSYGHGTNDDGFSEHVFPQTSIWQQLTETNHSWTNYWDTAGGTGPDAGYFSWTYETGNNDKIVAMENFYTDAAAGSLPELSYINPSCCGVGTTSMHPSGLVSDGEELIRSVYDALRASPQWEQTLFILTFDESGGFHDHVPPPLAPRPDNLTYTSTTPSGQNYTLSFNRLGGRIPTLLISPWVAKAYVEQKSLNSEGET…	19.5	IPTLLISPWVAK-TLGYLWDFEPFNPR-	#
tam504_all	hypothetical protein AN7691.2 [Aspergillus nidulans FGSC A4]	gi%7c67901408 gi%7c40742687 gi%7c259484034	49797	128	39	2	0.05	MHPSALLGLLSFAAAALAVPAGQAPHTARSISNLKSHIKNVVILVMENRSFDNILGGQTTPGLENPLQSGPFCNPFNLTDPSEGEACTAPKSFDSVINDPDHAIYGNNIQFYGEFVPDNAAIASGELKATNKGFAHEQMRLYEDVANKTDLVTEVMHYYTEEQVPVLTALVKNYLTFNHWHSDIPGNTNPNRAALVSGSSHGHGLNDDGFTNHELPNRSIFQQLTETGHSWLNYVDPDGGTGPDAGFYDWTYATGNDDKIVPLAQFYTDAAAGNLTEFTYINPSCCGVGTTSMHPSGLISDGETFIKSVYDALRAGPQWNNTLFVLTFDESGGFHDHVPAPLAPRPDDLTFTLETPNGENYTFPFDRLGGRIPTLLISPWVAKGAVEQKGTNHKNDVVS…	19.5	IPTLLISPWVAK-TLGYLWDFEPFNPR-	#
tam504_all	transporter [Streptomyces filamentosus]	gi%7c493075048 gi%7c291345844	57325	90	34	2	0.02	MALACSVALTSCTAGPATGPGRAAASPASADPASRPDLKPFYGQRLRWTDCDTEGYACARLTVPRDYDAPGNGKTFVLPVARAAAGKPDRRIGSLVYNPGGPGAAGVQSLEEGMDEAFGRAARDRFDIVAFDPRGVGASVPALTCTASDDEAEEEKGEATEPPASDGVAPLHPRTEKERTAADEGARAAAEDCERHSGGLLRHVGTQDAARDLDVLRAALGERELTYLGWSYGTSLGTAYAELFPRRVRAMVLDGAIDPSLDWSQRVLSQSAGFRRSVDDYADHCAEVAGDSCPADSPDAIRALIERLYARAEREPLPVSEDSSYAEYGGMDATAVLDAVSMAMYTPEDQWEPLSRALAAADAGDATELGALDEEEPAPTEEDPAPEDTGDGTEEESGD…	17	DRFDIVAFDPR-FDIVAFDPR-	#
tam504_all	facilitated glucose transporter [Aspergillus oryzae RIB40]	gi%7c169774179 gi%7c83769420 gi%7c391872222	67803	89	29	2	0.04	MDEKTSLGATAHNETLTQATKSGLADPADRRESFALNLVENPLTRSSPEQAVLDARAFAESHQMAEHADLFGRAALVARDPQRFEMITELSEDERAALIYERDHKWHGPFMLWYSIALCAVGAATQGWDQTGSNGANLSFPQEFGLVGTARAEWIVGVINAIIFLTAGLIGAFIVDPLNHYLGRRGEIFVTACCLTATPIGSAFAKSWQGLFAARFVMGIGIGAKNATVPIYSAEMAPARIRGALVMFWQLWVVAGIFLGFCANVIVKDTGDISWRLQLGSAFIPSFILGAGIYFCPESPRWLMKHGKYASGFKSMLRLRAHPIIAARDFYYSWIIYEEELKEARGAGYFARMWDCFAVPRIRRANYGASTVMLAQQMCGINIISFYSSTIFEDVGYTS…	14.5	FVMGIGIGAK-NATVPIYSAEMAPAR-	#
tam504_all	facilitated glucose transporter_ putative [Aspergillus flavus NRRL3357]	gi%7c238497321 gi%7c220694776	67789	89	29	2	0.04	MDEKTSLGATAHNETLTQATKSGLADPADRRESFALNLVENPLTRSSPEQAVLDARAFAESHQMAEHADLFGRAALVARDPQRFEMITELSEDERAALIYERDHKWHGPFMLWYSIALCAVGAATQGWDQTGSNGANLSFPQEFGLVGTARAEWIVGVINAIIFLTAGLIGAFIVDPLNHYLGRRGEIFVTACCLTATPIGSAFAKSWQGLFAARFVMGIGIGAKNATVPIYSAEMAPARIRGALVMFWQLWVVAGIFLGFCANVIVKDTGDISWRLQLGSAFIPSFILGAGIYFCPESPRWLMKHGKYASGFKSMLRLRAHPIIAARDFYYSWVIYEEELKEARGAGYFARMWDCFAVPRIRRANYGASTVMLAQQMCGINIISFYSSTIFEDVGYTS…	14.5	FVMGIGIGAK-NATVPIYSAEMAPAR-	#
tam504_all	Pc16g07410 [Penicillium chrysogenum Wisconsin 54-1255]	gi%7c255940594 gi%7c211585689	70718	89	29	2	0.03	MEEKTPKEAPPHYEHAVQANKAELDEAANADAPERRQAIGINIVQNPLMRSSKEQAIIDARAYAESHNMSEYADLFGRAAVIARSPNDFPTATEIDEEERAALTYERDHKWHGPRMLWYSIGLCAVGAATQGWDQTGSNGANLSFHEEFNIDGKGKDEWIVGIVNSIIFLTAGLIGAWIVDPLNHYLGRRGEIFVTALCLTATPIGSGFAQSWQGLFAARFVMGIGIGAKNATVPIYSAEMAPARTRGALVMFWQLWVVAGIFLGFAANVIVKDVKDIAWRLQLGSAFIPSFILGAGIYFCPESPRWLMKHNRHAEGFNSMLRLRAHPIIAARDFYYSYVIYEEELKEARGAGYFSRLWDCFAVPRIRRANYGASTVMIAQQMCGINIISFYSSTIFRE…	14.5	FVMGIGIGAK-NATVPIYSAEMAPAR-	#
tam504_all	facilitated glucose transporter_ putative [Metarhizium anisopliae ARSEF 23]	gi%7c322705006	69565	89	29	2	0.03	MEKKASAEPPGYTEPVLHHDEQQGRRGSAALNIIENPLKRKSEDDNVRDARAFAETHGMSEHAALFGRAALVARDPQRFEMISELDEEERGALQYERDHKWHGPFMLWYSIGLCAVGAATQGWDQTGANGANLSFPQEFGIAGEGRDEWIVGLVNSIIFLTAGLIGAFIVDPLNHYLGRRGEIFVTAACLTATPIGSAFAKSWQGLFAARFVMGIGIGAKNATVPIYSAEMAPARTRGALVMFWQLWVVAGIFLGFAANVIVKDVGDNAWRLQFGSAFIPSFVLMLGIFFCPESPRWLMKHNRHDEGFRSMLRLRAHPIIAARDFYYSHVIYEEEKKEARGAGYFSRLWDCFAVPRIRRANYGASTVMIAQQMCGINSSFASPPPPPPFVGGGKLTIAR…	14.5	FVMGIGIGAK-NATVPIYSAEMAPAR-	#
tam504_all	MFS transporter_ SP family_ major inositol transporter [Exophiala dermatitidis NIH/UT8656]	gi%7c378727701	68710	89	29	2	0.04	MAEKNAAEYAQYSHDEKNLNPTSEPGLVDAGERRKSVALNIVENPLKRCSPEQTVADAQTFAESHGMAEHAALFGRAALVARDSDNFEAVTQLDEEERAALTYERDHKWHGPFMLWYSIALCAVGAATQGWDQTGSNGANLSFPDEFGLKSEGRDEWIIGIINAIIFLTAGLIGAFIVDPLNHYFGRRGEIFITACCLTATPIGSAFAQSWQGLFAARFVMGIGIGAKNATVPIYSAEMAPARIRGALVMFWQLWVVAGIFLGFCANVIVKDTGRLSWRLQLGSAFIPSFILGVGIFFCPESPRWLMKHGKHAQAFRSMLRLRAHPIIAARDFYYSWVIYQEELREARGAGYFRRLWDCFAIPRIRRANYGASTVMIAQQMCGINIISFYSSTIFEDVG…	14.5	FVMGIGIGAK-NATVPIYSAEMAPAR-	#
tam504_all	hypothetical protein MYCGRDRAFT_70886 [Zymoseptoria tritici IPO323]	gi%7c398398918 gi%7c339472798	70555	89	29	2	0.03	MAEKINDVNQHVDHNSDSNDEKSGHYGHDQPERRASVALNIVENPLKRGTSEQTAAKAREFCQMAGMPEHADLFGKAALVARDPDAFEALPGLSEEERAALIYERDHKWHGPKMLWYSIGLCAIGAATQGWDQTGSNGANLSFPTEFGIDSNRGKDVWIVGAINSIIFLTAGLIGAFIVDPLNKYLGRRGEIFLTAACLTATPIGSGFAQSWQGLFAARFVMGIGIGAKNATVPIYSAEMAPARVRGALVMFWQLWVVAGIFLGFCANVIVKDVPRIAWRLQLGSAFIPSLILMIGIYFCPESPRWLMKQGKLAKGFQSMAKLRAHPIIGARDFYYSYVLYQEELAISGDSTYFTRLRDCFTVPRIRRSNYGASTVMLAQQMCGINIISFYSSTIFTEA…	14.5	FVMGIGIGAK-NATVPIYSAEMAPAR-	#
tam504_all	hypothetical protein PDIG_15560 [Penicillium digitatum PHI26]	gi%7c425779365 gi%7c425779547	50559	89	29	2	0.05	MDEKSSEGAPHYEHGIPAKKEQDEAANPDTPERRRAIGINVVENPLTRSSKEQAIVDARAYAEWHNMSEYADLFGRAAVVARSPKEFPSAPELDEEERTALAYERDHKWHGPFMLWYSIGLCAIGAATQGWDQTGSNGANLSFPEEFGIASKGKDEWIVGIVNSIIFLTAGLIGAWIVDPLNHYLGRRGEIFVTALCLTATPIGSGFSKSWQGLFAARFVMGIGIGAKNATVPIYSAEMAPARTRGIFLGFAANVIVKDVKDIAWRLQLGSAFIPSFILSIGIFFCPESPRWLMKHNRHAEGFQSMLRLRAHPIIAARDFYYSYIIYEEELKEARGAGYFSRLWDCFAVPRIRRANYGASTVMIAQQMCGINIISFYSSTIFRDVGYTEDQALYASLGY…	14.5	FVMGIGIGAK-NATVPIYSAEMAPAR-	#
tam504_all	hypothetical protein FG03957.1 [Fusarium graminearum PH-1]	gi%7c46116230 gi%7c558859124	68768	89	29	2	0.04	MDSKELGPDVPQASHDEKHALDGAHSDIPPGSGGRRGSTALNIVENPLQRVTPEKAVNDARLFAQNHGMPEHAELFGRAALVARDLDRFNNVKELQEDERQALEYERDHKWHGPKMLWYSIGLCAIGAATQGWDQTGSNGANLSFPKEFGLDEENSIRDQWIVGLVNSIIFLTAGLIGAFIVDPLNHYFGRRGEIFITACCLTATPIASGFTHSWQTLFAVRFVMGIGIGAKNATVPIYSAEMAPARIRGALVMFWQLWVVIGIFLGFCANVIVKDTGRIAWRLQLGSAFIPSFILGIGIFFCPESPRWLMKHGKHAKGFQSMQKLRAHDIIAARDFYYSCIIYEEELLVARGAGYFQRLWDCFAVPRIRRANYGASTVMIAQQMCGINIISFYSSTIF…	14.5	FVMGIGIGAK-NATVPIYSAEMAPAR-	#
tam504_all	short chain dehydrogenase [Nocardia brasiliensis ATCC 700358]	gi%7c407644672 gi%7c504797210 gi%7c407307556	27103	102	27	2	0.06	MILDRFRIDGQVAIVTGAGRGLGAAIALAFAEAGADVVIAARTKSQLDEVAERVAATGRQAHVVPADLSDLDTTAALAATAVERFGRLDIVVNNVGGAMPCTLLDTTPQALVDAFNFNVTNAHALVCAAVPRMLETAGGGSILNITSTMGRLPGRAFAAYGTAKAALAHYTKLAALDLNPRIRVNAIAPGSILTSALEIVAGNEAMRTELETKTPLQRIGDPEDIAAAALYLVSPAGKYLTGKVIEPDGGLIVPNLHLPIPDL	13.5	AFAAYGTAK-LAALDLNPR-	#
tam504_all	short chain dehydrogenase [Nocardia farcinica IFM 10152]	gi%7c54024436 gi%7c499522359 gi%7c54015944	27043	102	27	2	0.06	MILDRFRIAGQVAVVTGAGRGLGRAIAVAFAEAGADVLIAARTKQQLDEVAEQITAAGRQAHVVAADLSDPETAAGLAEAAVQRFGRLDIVVNNVGGAMPSPLLDTTPQAMIEAFTFNVANAHALIRAAVPHMLATADGGSIVNITSTMGRLPGRAFAAYGTAKAALAHYTKLAALDLNPRIRVNAIAPGSILTSSLEVVAGNEQLRTELETKTPLHTIGEPADIAAAALYLVSPAGKYLTGKVLEPDGGLIQPNLAIPIPDL	13.5	AFAAYGTAK-LAALDLNPR-	#
tam504_all	hypothetical protein AN2903.2 [Aspergillus nidulans FGSC A4]	gi%7c67524891 gi%7c40744298 gi%7c259486160	42773	160	26	2	0.07	MKASLLTASVLLGYASAEVHKLKLNKVPLTEQFITRNIADHANALGQKYMGQFQQHVLEDEPVNAMRGHDVLVDNFMNAQYFSEIQLGTPPQTFKVVLDTGSSNLWVPSSECGSIACYLHQKFDSSASSTYKKNGSEFAIKYGSGSLSGFVSRDNLQIGDLKVKGQDFAEATSEPGLAFAFGRFDGILGLGFDTISVNRIVPPFYNMIHQGLLDEPVFAFYLGDANKDGDSSVATFGGIDKDHYEGELIKIPLRRKAYWEVDLDAIALGDEVAELENTGVILDTGTSLIALPSNLAEMINTEIGATKGFTGQYTIDCAKRDSLPDLTFTLTGHNFTIGPYDYTLEVQGSCISAFMGMDFPEPVGPLAILGDAFLRKWYSVYDLGNGAVGLAKAK	13	YGSGSLSGFVSR-GQDFAEATSEPGLAFAFGR-	#
tam504_all	hypothetical protein AN2493.2 [Aspergillus nidulans FGSC A4]	gi%7c67524071 gi%7c40744822 gi%7c259487917	73075	121	26	2	0.03	MKPTSFAGVALFASGAFGQYFQRLGGCPSLGCVFPPDQADFLPGQHFDIRLEVHSPVNGSEARDGVPDTNFKFTVGKKGQEGVPVTEFFDIEDAELENWQFSWYEDLFAQDAETPSVVNVTSKAYRNLALYEPGEYEAILTYYGKEQTVANWLVRDIPKKRRAKNVVLFVGDGMTTNMITAARLIAHKSINGKYQTKLQLDKFPVLGHQMTHSMDSFITDSANSAAALYGGHKTTVNCLGVYADSSEDPFDDPKFELLPEIFRRQHNGGIGIVSTAFLADATPGAMTSHTRLRSEYDHVISTFLEGITNHTWTEFDGPDVLFGAGAENFLTSEDAPRDYYKLFTEKGYSLSLNKTSLESVSNEDRALGVFSLSNLPTWLDRNVYQDNLKELANHPDGSG…	13	AIDILDTR-SLGELLELDDTVR-	#
tam504_all	Pc12g05400 [Penicillium chrysogenum Wisconsin 54-1255]	gi%7c255931657 gi%7c211582004	51824	78	21	2	0.04	MASSLRIGTTALRSSIAKPVQSAAFNGVRCYSSAKVKSLKDTFADNLPAEIEKVKKLRKEHGNKVIGEVTLDQAYGGARGIKSLVWEGSVLDSEEGIRFRGYTIPECQKLLPKAPGGEEPLPEGLFWLLLTGEIPSEQQVRNLSAEWAARSDVPKFVEELIDRCPNTLHPMAQFSLAVTALEHESAFAKAYAKGVNKKEYWTYTFEDSMDLIAKLPTIAARIYRNVFKDGKVAPIQKDKDYSFNLANQLGFGGNKDFVELMRLYLTIHSDHEGGNVSAHTTHLVGSALSSPMLSLSAGLQGLAGPLHGLANQEVLNWITKMKESVGNDISDQSIKDYLWSTLNNGQVVPGYGHAVLRKTDPRYVSQREFALRKLPDDPLFKLVSQVYKIAPGVLTEHGK…	10.5	NLSAEWAAR-AIGVLPQLIIDR-	#
tam504_all	mitochondrial citrate synthase precursor [Penicillium oxalicum]	gi%7c260875772	51744	78	21	2	0.04	MASSLRIGTTALRSSIAKPVQTAAFNGVRCYSSAKTKSLKDTCADNLPAEIEKVKKLRKEHGNKVIGEVTLDQAYGGARGIKSLVWEGSVLDSEEGIRFRGYTIPECQKLLPKAPGGEEPLPEGLFWLLLTGEIPSEQQVRNLSAEWAARSDVPKFVEELIDRCPNTLHPMAQFSLAVTALEHESAFAKAYAKGVNKKEYWTYTFEDSMDLIAKLPTIASRIYRNVFKDGKVAPVQKDKDYSFNLANQLGFGGNKDFVELMRLYLTIHSDHEGGNVSAHTTHLVGSALSSPMLSLSAGLQGLAGPLHGLANQEVLNWITKMKESVGSDISDQSIKDYLWSTLNSGQVVPGYGHAVLRKTDPRYVSQREFALRKLPDDPLFKLVSQVYKIAPGVLTEHGK…	10.5	NLSAEWAAR-AIGVLPQLIIDR-	#
tam504_all	short-chain dehydrogenase_ putative [Talaromyces stipitatus ATCC 10500]	gi%7c242760441 gi%7c218723188	65655	117	18	2	0.02	MRSTILKVAAVLSPVALAQAAVFIPDSSCATCAGLSSLPVPYNLSASQTNSIDEGASNSFWISSFVSGSNGHQYFILSHVLGGSLASYRASVLDITNPSIRAQFSTSDTANTSIYSDTGIFNFTTSNFTFGATSETDGLTKMRTWSNYNSVQFDITFETSSPVLLNGGTGSFEATGGFGYEWSMPAGKTTGSLTIQNTTVTIDTLHSKTWYDRQWGNVAQAWYWFEIHIEPIAAYPTGAVLSVWNWIDDISGNKNFATVRDALGTQSIVPVTKFARNLNSVWTSVHTGDKWVQEFDLMLEDGTSLSISSVREDQELWDEADAAAGGGFEGYMTVTGSYKGIPGARGFANKKRTNKITGVSKTLVDRTKYINNTRFDEWWDRDCNTTERLSIVHGDKLLK…	9	ASILILR-GLAVDLAPIR-	#
tam504_all	Dipeptidyl-peptidase 5 [Penicillium digitatum Pd1]	gi%7c425766641	110977	85	15	2	0.02	MRVFPLTTALGSIFISAAALTPEELIAAPRRGEAIPNPSGEVALFSTSEYSFETHVTSSWWSLLDLETGKVTQLTNDSNVSELTWLGSTDSGLLYINGTNAETPGGTEIWVSDTSDFTTSAYKAASLPARLSGLKTATTTSGDINFLVYGESWPNGTAYNEELAAKPLSSARIYDSIYVRHWDKWITTRFNAIYSGTLKKKRAGHGATSSYTSSGSLRNLVAGVKNLESPYPPFGDSSDYDISSDGKLVAFKSKAPELPRANNTASYIFLVPHDGSRKAVAINGPDSPGTPKGIKGDSSSPVFSPDGRHLAYLQMEDISYESDRRTVYVYTIGSTDTIRTLAKNWDRSPGAIKWTADGKNLVLNTEDSARSRLFLLPADAGKDFKPKNFTDSGAVAAYY…	7.5	IYDSIYVR-LPISEGLALFNVLQER-	#
tam504_all	hypothetical protein ATEG_09343 [Aspergillus terreus NIH2624]	gi%7c115438046 gi%7c114188780	67619	103	12	2	0.03	MPSTKSVVIGAVGLAGAVAGQYFPPTPEGLKVVHSKHEKGVKISYKEPGVCETTPGVKSYSGYVHLPPGTLKDVSLDQDYPINTFFWFFEARNDPRNAPLSIWMNGGPGSSSMIGLLQENGPCRINPDSNSTEINPWSWNNYVNMLYIDQPSQVGFSYDVPTNGTYNQITGEYDVSGFPGGVPPVQNNTFNVGTFPSLNKSTTANSTQNAARALWHFAQTWFSEFPEYKPHDDRVSIWTESYGGRYGPSFTAYFQEQNEKIAKGTVSRDVDAHYIHLDTLGIINGCVDLLVQSPKYPEIAYNNTYGIETINKTVYDAAMRAWSKPGGCKDQIIECRRLAAEGDPQMFGNNATVNKACRKADQYCSNQVEGPYTEFSGRGYYDISHLNPDPFPPPYFFGF…	6	GYLEDLAYVLDSGIK-VALVYGDR-	#
tam504_all	TPA: carboxypeptidase S1_ putative (AFU_orthologue_ AFUA_5G07330) [Aspergillus nidulans FGSC A4]	gi%7c259487624	70302	103	12	2	0.03	MVSPSDESVLSSLLASWVTRVLPSLSMPSLTSVVGLSASLVGLVAGQYFPPTPEGVKVIHSKHQKGVTISYKEPEICETTPGVKSYSGYVHLPPGTLNDLGLDQQYPINTFFWFFESRNDPVNAPLSIWMNGGPGSSSMIGLMQENGPCRVNIDSNSTELNPWSWNNYVNMLYIDQPNQVGFSYDVPTNGTYNQLTGVRDVSGWSTVPEQNNTFYVGTFPSLNASATANTTENAARALWSFAQTWFTEFPAYKPRDDRVSIWTESYGGRYGPSFSAFFQEQNEKIANGSLTTPGESHYIHLDTLGIINGCIDLLVQAPSYPEIAYNNTYGIEAINETIYEFAMNAWSKPGGCKDQIVRCRQLAAEGDPRMYGNNKTVNAACQAADRYCSNNVEGPYPLF…	6	GYLEDLAYVLDSGIK-VALVYGDR-	#
tam504_all	hypothetical protein AN2237.2 [Aspergillus nidulans FGSC A4]	gi%7c67523563 gi%7c40744766	67560	103	12	2	0.03	MPSLTSVVGLSASLVGLVAGQYFPPTPEGVKVIHSKHQKGVTISYKEPEICETTPGVKSYSGYVHLPPGTLNDLGLDQQYPINTFFWFFESRNDPVNAPLSIWMNGGPGSSSMIGLMQENGPCRVNIDSNSTELNPWSWNNYVNMLYIDQPNQVGFSYDVPTNGTYNQLTGVRDVSGWSTVPEQNNTFYVGTFPSLNASATANTTENAARALWSFAQTWFTEFPAYKPRDDRVSIWTESYGGRYGPSFSAFFQEQNEKIANGSLTTPGESHYIHLDTLGIINGCIDLLVQAPSYPEIAYNNTYGIEAINETIYEFAMNAWSKPGGCKDQIVRCRQLAAEGDPRMYGNNKTVNAACQAADRYCSNNVEGPYPLFSGRGYYDIAHFDPDPFPPPYYLGYLS…	6	GYLEDLAYVLDSGIK-VALVYGDR-	#
tam504_all	hypothetical protein [Podospora anserina S mat+]	gi%7c171685099 gi%7c170942510	64988	117	11	2	0.03	MANTPHGGVLKDLIARDAPRHAELSAEAETLPALLLSERQLCDLELILTGGFSPLEGTLCSLFSTQWLAKKYGGDGFMTEKDYNGVVKDNRLADGALFSMPITLDVDQATIDEVKIAPGARITLRDFRDDRNLAILTVEDAKEVFGGDEEHPAIQYLYNTAKEFYVGGKLEAINKLQHYDFVELRYTPAELRAHFDKLGWAKVVAFQTRNPMHRAHRELTVRAARSHHANVLIHPVVGLTKPGDIDHFTRVRVYKALLPRYPNGMAVLGLLPLAMRMGGPREAIWHAIIRKNHGATHFIVGRDHAGPGKNSKGVDFYGPYDAQYAVEKYRDELGIEVVPFQMMTYLPDSDEYAPVDQISKGVRTLNISGTELRSRLRSGREIPEWFSYPEVVKVLRESH…	5.5	ALQVTLNQQGGR-IAFVASELTR-	#
tam504_all	hypothetical protein SMAC_05429 [Sordaria macrospora k-hell]	gi%7c336264708 gi%7c380093825	64300	117	11	2	0.03	MSNPPHGGVLKDLIARDLPRHAELEAEAETLPALLLSERQLCDLELILNGGFSPLEGFMNQEDYNGVVKENRLASGLLFSMPITLDVSEETISELGLKAGARITLRDFRDDRNLAILTVDDVYKPDKALEAKEVFGGDEEHPAVKFLYETAKEYYVGGKLEAVNKLQHYDFVDLRYSPAEIRTHFDKLGWSRVVAFQTRNPMHRAHRELTVRAARSHHANVLIHPVVGLTKPGDIDHFTRVRVYKALLPRYPNGMAVLGLLPLAMRMGGPREAIWHAIIRKNHGATHFIVGRDHAGPGKNSKGVDFYGPYDAQYAVEKYRDELGIEVVPFQMMTYLPDSDEYAPVDEIPKGVRTLNISGTELRARLRSGREIPEWFSYPEVVKVLRESHPPRSQQGFTV…	5.5	ALQVTLNQQGGR-IAFVASELTR-	#
tam504_all	hypothetical protein CTHT_0012040 [Chaetomium thermophilum var. thermophilum DSM 1495]	gi%7c340975615	71216	117	11	2	0.03	MPTLKVLSALPGLCHDRMNAVTGARPAMCQRYSFFLLFDTQTVPTAGFATLAFRLKSSNSQIIKMANTPHGGVLKDLLARDLPRHAELAAEAETLPALVLTERQLCDLELLLNGGFSPLEGFMNEKDYNGVVKDNRLADGSLFSMPITLDVSQETIDELSIKPGARITLRDFRDDQNLAIITVEDVYKPDKELEAKEVFGGDPEHPAIQYLFNTAKEFYVGGKLEAVNKPQHYDFVELRYTPAELRAHFDKLGWTRVVAFQTRNPMHRAHRELTVRAARSHHANVLIHPVVGLTKPGDIDHFTRVRVYKALLPRYPNGMAVLGLLPLAMRMGGPREAIWHAIIRKNHGATHFIVGRDHAGPGKNSKGVDFYGPYDAQHAVEKYRDELGIEVVPFQMMTY…	5.5	ALQVTLNQQGGR-IAFVASELTR-	#
tam504_all	hypothetical protein THITE_2111564 [Thielavia terrestris NRRL 8126]	gi%7c367041988 gi%7c346998636	64265	117	11	2	0.03	MANPPHGGVLKDLLARDLPRQAELAAEAETLPALVLTERQLCDLELLLNGGFSPLEGFMNEQDYNGVVKENRLASGLLFSMPITLDVAQETIDELSLKAGARITLRDFRDDRNLAILTVEDVYKPDKAVEAKEVFGGDEDHPAVRYLFNTAKDFYVGGKLEAVNKLQHYDFVELRYTPAELRAHFDKLGWTKVVAFQTRNPMHRAHRELTVRAARSHHANVLIHPVVGLTKPGDIDHFTRVRVYKALLPRYPNGMAVLGLLPLAMRMGGPREAIWHAIIRKNHGATHFIVGRDHAGPGKNSKGVDFYGPYDAQHAVEKYRDELGIEVVPFQMMTYLPDRDEYAPVDQIPPGVRTLNISGTELRARLRSGREIPEWFSYPEVVKVLRESHPPRSKQGFTV…	5.5	ALQVTLNQQGGR-IAFVASELTR-	#
tam504_all	hypothetical protein PDE_01576 [Penicillium oxalicum 114-2]	gi%7c525580388	64341	117	11	2	0.03	MANAPHGGVLKDLLARDAPRHDELAAEAETLPAIVLSERQLCDLELIMNGGFSPLEGFMNQADYDRVCQDCRLADGNVFSMPITLDVTQQIVDENKLKAGARVTLRDFRDDRNLAILTIDDIYRPDKKKEGELVFGGDPEHPAIVYLNETIKDLYIGGKVEAVNKLNHYDYVGLRYTPAELRVHFDKLGWSRVVAFQTRNPMHRAHRELTVRAARSRQANVLIHPVVGLTKPGDIDHFTRVRAYQALLPRYPNGMAVLGLLGLAMRMGGPREAIWHAIIRKNHGATHFIVGRDHAGPGKNSKGVDFYGPYDAQHAVEKYKDELGIEVVEFQMVTYLPDTDEYRPVDQVPEGVKTLNISGTELRRRLRTGAHIPEWFSYPEVVKILRESNPPRASQGFTI…	5.5	ALQVTLNQQGGR-IAFVASELTR-	#
tam504_all	sulfate adenylyltransferase [Neurospora crassa OR74A]	gi%7c85112452 gi%7c74618118 gi%7c28926127 gi%7c38567069	64421	117	11	2	0.03	MSNPPHGGVLKDLIARDLPRHAELEAEAETLPALLLSERQLCDLELILNGGFSPLEGFMNQEDYNDVVKENRLASGLLFSMPITLDVSEETISELGLKAGARITLRDFRDDRNLAILTVDDVYKPDKALEAKEVFGGDEEHPAVKFLYETAKEYYVGGKLEAVNKLQHYDFVDLRYSPAEIRTHFDKLGWSRVVAFQTRNPMHRAHRELTVRAARSHHANVLIHPVVGLTKPGDIDHFTRVRVYKALLPRYPNGMAVLGLLPLAMRMGGPREAIWHAIIRKNHGATHFIVGRDHAGPGKNSKGVDFYGPYDAQYAVEKYRDELGIEVVPFQMMTYLPDSDEYAPVDQIPKGVRTLNISGTELRARLRSGREIPEWFSYPEVVKVLRESHPPRSQQGFTV…	5.5	ALQVTLNQQGGR-IAFVASELTR-	#
tam504_all	hypothetical protein MGCH7_ch7g369 [Magnaporthe oryzae 70-15]	gi%7c86196324	61023	117	11	2	0.04	MANPPHGGVLKDLLARDAPRNAELAAEAETLPALLLTERQLCDLELIITGGFSPLEGFMTEKDYNGVVKENRLTDGALFSMPITLDLSQQTIDENGVKPGARITLRDFRDDRNLTILTVEDVYRPDKQLEAKEVFGGDPEHPAVNYLFNTAGEFYVGGKLEAVNRLQHYDFTRNPMHRAHRELTVRAARSHHANVLIHPVVGLTKPGDIDHFTRVRVYKALLPRYPNGMAVLGLLPLAMRMGGPREAIWHAIIRKNHGATHFIVGRDHAGPGKNSAGVDFYGPYDAQYAVEKYKDELGIEVVPFQMMTYLPDSDEYAPVDTIEKGVRTLNISGTELRSRLRSGRDIPEWFSYPEVVKVLRESHPPRSQQGFTIFLTGYQNSGKDQIARALQVTLNQQGG…	5.5	ALQVTLNQQGGR-IAFVASELTR-	#
tam504_all	PP2C-domain-containing protein [Mycosphaerella populorum SO2202]	gi%7c453088017	69543	76	10	2	0.03	MSGSNNTQTTDNVAGSKRRSLSGQGGLLGRMFGSKENNSNNNSSNNNNSSGGGSSSAGSGSREPLDINAANSNINQGADGSGNSNDSPRTPNMHNGNQTQPIREEGQDAVSNEMRSPTRKESQEQGNSKRRSSGVGRAGDLFNRAKQALGGSPDNKSSSHQTPMQKLGRTDPALSVPAGSLNNSAGESAPGPRSTFRVGVTEDKNKKCRRTMEDTHAYLYNFLSTPAPALGPDGGSNKPLSQSQSRDSAVSEGTQNSTREVVETDNGYFAIFDGHAGTFAAEWCGKKVHLLLEEIIRKNPNTAIPELLDMTFTTVDQQLEKLPLKNSGCTAVLAVLRWEDRIPNSQSATGSTALAPATAESQNVERTVQQASRQRVLYTANVGDARIVLCRNGKALRLS…	5	SLSGQGGLLGR-VLYTANVGDAR-	#
tam504_all	superoxide dismutase_ partial [Nocardia testacea]	gi%7c76560314	16025	106	8	2	0.26	CKHHATYVAGVNTALEKLEAAREADDHGAIFLHEKNLAFHLGGHVNHSIWWKNLSPNGGDKPTGELAAAIDDQFGSFDKFRAQFTAAANGLQGSGWAVLGYDTLGQKLLTFQLYDQQANVPLGIIPLLQVDMWEHAFYLQYQNVK	4	EADDHGAIFLHEK-AQFTAAANGLQGSGWAVLGYDTLGQK-	#
tam504_all	hypothetical protein [Rhodococcus fascians D188]	gi%7c23821219	17334	81	8	2	0.12	MSQNDNDSNYGESPAETTSVFRADFLQELDNSATAQSTEAPVSGVEGLPVGAALLVVKRGPNAGSRFLLDQPTTSAGRHPDSDIFLDDVTVSRRHAEFRQDEDDFQVVDVGSLNGTYVNREPVDSAVLANGDEVQIGKFRLVFLTGPRGGNGSAVGESSAGAGSQ	4	FLLDQPTTSAGR-LVFLTGPR-	#
tam504_all	hypothetical protein NOCYR_2564 [Nocardia cyriacigeorgica GUH-2]	gi%7c379708765 gi%7c504116808 gi%7c374846264	17119	81	8	2	0.12	MSENKDPGYGETAAETTSVFRADFLNEVDASRSGEATGEQPVQGVEGLPVGAALLVVKRGPNAGSRFLLDQPTTSAGRHPDSDIFLDDVTVSRRHAEFRQDEDSFQVVDVGSLNGTYVNREPVDSSELQNGDEVQIGKFRLVFLTGPRAQTSDSAAGAGSL	4	FLLDQPTTSAGR-LVFLTGPR-	#
tam504_all	peptide-binding protein [Mycobacterium fortuitum]	gi%7c489978906 gi%7c403659001	16794	81	8	2	0.12	MTDKDSNLGADQSEDVTVETTSVFRADFLNELDAPATAGTEGAVSGVEGLPAGSALLVVKRGPNAGSRFLLDQPTTSAGRHPDSDIFLDDVTVSRRHAEFRLESGEFQVVDVGSLNGTYVNREPVDSAVLANGDEVQIGKFRLVFLTGPRSDDDSSSTS	4	FLLDQPTTSAGR-LVFLTGPR-	#
tam504_all	peptide-binding protein [Nocardia sp. BMG111209]	gi%7c518768444	16903	81	8	2	0.12	MSENKDPGYGESAAETTSVFRADFLNEVDASRSGEQTGEQPVQGVEGLPAGAALLVVKRGPNAGSRFLLDQPTTSAGRHPDSDIFLDDVTVSRRHAEFRQDDDTFQVVDVGSLNGTYVNREPVDSSELQNGDEVQIGKFRLVFLTGPRAAASDSAAGAL	4	FLLDQPTTSAGR-LVFLTGPR-	#
tam504_all	peptide-binding protein [Mycobacterium sp. 141]	gi%7c518816878	16892	81	8	2	0.12	MTDKDSNLGADQTSDEVTVETTSVFRADFLNELDAPAAKSAEGTVSGVEGLPSGSALLVVKRGPNAGSRFLLDQPTTSAGRHPDSDIFLDDVTVSRRHAEFRLEGAEFQVVDVGSLNGTYVNREPVDSAVLANGDEVQIGKFRLVFLTGPRSDDDSGSTG	4	FLLDQPTTSAGR-LVFLTGPR-	#
tam504_all	hypothetical protein nfa24860 [Nocardia farcinica IFM 10152]	gi%7c54024455 gi%7c499522378 gi%7c54015963	17284	81	8	2	0.12	MSENKDPGYQETAAETTSVFRADFLNEVDASRSGEQTGEQPVQGVEGLPAGAALLVVKRGPNAGSRFLLDQPTTSAGRHPDSDIFLDDVTVSRRHAEFRQDDDTFQVVDVGSLNGTYVNREPVDSSELQNGDEVQIGKFRLVFLTGPRAQVNEPSAGAGSL	4	FLLDQPTTSAGR-LVFLTGPR-	#
tam504_all	RAS small monomeric GTPase RasA [Neosartorya fischeri NRRL 181]	gi%7c119479087 gi%7c119407726	23914	96	7	2	0.11	MASKFLREYKLVVVGGGGVGKSCLTIQLIQSHFVDEYDPTIEDSYRKQCLIDDEVALLDVLDTAGQEEYSAMREQYMRTGEGFLLVYSITSRQSFEEIMTFQQQILRVKDKDYFPIIVVGNKCDLEKERAVSQQEGEALARQFGCKFIETSAKSRINVENAFYDLVREIRRYNKEMSSYPSGSGAAGTRAPEGKMDVSEPGDNAGCCGKCIIM	3.5	AVSQQEGEALAR-INVENAFYDLVR-	#
tam504_all	RAS small monomeric GTPase RasA [Aspergillus fumigatus Af293]	gi%7c70997565 gi%7c825440 gi%7c37594596 gi%7c66851162 gi%7c159126742	23886	96	7	2	0.11	MASKFLREYKLVVVGGGGVGKSCLTIQLIQSHFVDEYDPTIEDSYRKQCVIDDEVALLDVLDTAGQEEYSAMREQYMRTGEGFLLVYSITSRQSFEEIMTFQQQILRVKDKDYFPIIVVGNKCDLEKERAVSQQEGEALARQFGCKFIETSAKSRINVENAFYDLVREIRRYNKEMSSYPSGSGAAGTRAPEGKMDVSEPGDNAGCCGKCVIM	3.5	AVSQQEGEALAR-INVENAFYDLVR-	#
tam504_all	aldehyde dehydrogenase ALDH15 [Emericella nidulans]	gi%7c13309886	54133	132	5	2	0.05	MSDLFTTIETPVIKYEQPLGLFINNEFVKGVEGKTFQVINPSNEKVITSVHEATEKDVDVAVAAARAAFEGPWRQVTPSERGILINKLADLMERDIDTLAAIESLDNGKAFTMAKVDLANSIGCLRYYAGWADKIHGQTIDTNPETLTYTRHEPVGVCGQIIPWNFPLLMWSWKIGPAVAAGNTVVLKTAEQTPLSALYAAKLIKEAGFPAGVINVISGFGRTAGAAISSHMDIDKVAFTGSTLVGRTILQAAAKSNLKKVTLELGGKSPNIVFDDADIDNAISWVNFGIFFNHGQCCCAGSRILVQEGIYDKFVARFKERAQKNKVGNPFEQDTFQGPQVSQLQFDRIMEYINHGKKAGATVATGGDRHGNEGYFIQPTVFTDVTSDMKIAQEEIFGP…	2.5	VAFTGSTLVGR-ELGSYALENYTQIK-	#
tam504_all	aldehyde dehydrogenase [Aspergillus niger CBS 513.88]	gi%7c145240395 gi%7c134077361 gi%7c350629882	53834	132	5	2	0.05	MSDLFTTITTPNGVKYEQPLGLFIDGEFVKGAEGKTFETINPSNEKPIVAVHEATEKDVDTAVAAARKAFEGSWRQVTPSTRGRMLTKLADLFERDAEILASIEALDNGKSITMAHGDIAGAAGCLRYYGGWADKIHGQTIDTNSETLNYTRHEPIGVCGQIIPWNFPLLMWAWKIGPAIATGNTVVIKTAEQTPLSGLYAAKLIKEAGIPAGVVNVISGFGRVAGSAISHHMDIDKVAFTGSTLVGRTILQAAAKSNLKKVTLELGGKSPNIVFNDADIDNAISWANFGIFYNHGQCCCAGSRILVQEGIYDKFIARLKERALQNKVGDPFAKDTFQGPQVSQLQFDRIMEYIQHGKDAGATVAVGGERHGTEGYFIQPTVFTDVTSDMKINQEEIFG…	2.5	VAFTGSTLVGR-ELGSYALENYTQIK-	#
tam504_all	aldehyde dehydrogenase_ putative [Talaromyces marneffei ATCC 18224]	gi%7c212539926 gi%7c210067417	54043	132	5	2	0.05	MSLTQEISLPNGIKYEQPLGLFINGEFVKGVEGKTFETINPHDEKVITSVYEATEKDVDIAVKAARDALSGPWKHITPTERGRLLTKLADLFEENMDVLAGIESLDNGKATVFAKGDIQAGSYCLRYYGGWSDKIVGQTIDTDSTSLNYTLHEPVGVCGQIIPWNFPILMWAWKIGPAIATGNTVVLKTAEQTPLSALFAATLIQKAGFPPGVINVLSGFGRVAGAAISSHMDIDKVAFTGSTLVGRQILQAAAKSNLKKVTLELGGKSPNIVFPDANLENAISWINFGIYFNHGQCCCAGSRVLVHEAIYDKFLEAFKARAEKNKVGNPFDEGTYQGPQVSQIQFDRIMGYIDEGKKAGAKVVVGGERLGDKGYYIKPTIFADVNNEMKIVQEEIFGP…	2.5	VAFTGSTLVGR-ELGSYALENYTQIK-	#
tam504_all	DHAL_EMENI Aldehyde dehydrogenase (ALDDH) [Aspergillus nidulans FGSC A4]	gi%7c67516545 gi%7c146345365 gi%7c13309884 gi%7c40747497 gi%7c259489183	54105	132	5	2	0.05	MSDLFTTIETPVIKYEQPLGLFINNEFVKGVEGKTFQVINPSNEKVITSVHEATEKDVDVAVAAARAAFEGPWRQVTPSERGILINKLADLMERDIDTLAAIESLDNGKAFTMAKVDLANSIGCLRYYAGWADKIHGQTIDTNPETLTYTRHEPVGVCGQIIPWNFPLLMWSWKIGPAVAAGNTVVLKTAEQTPLSALYAAKLIKEAGFPAGVINVISGFGRTAGAAISSHMDIDKVAFTGSTLVGRTILQAAAKSNLKKVTLELGGKSPNIVFDDADIDNAISWANFGIFFNHGQCCCAGSRILVQEGIYDKFVARFKERAQKNKVGNPFEQDTFQGPQVSQLQFDRIMEYINHGKKAGATVATGGDRHGNEGYFIQPTVFTDVTSDMKIAQEEIFGP…	2.5	VAFTGSTLVGR-ELGSYALENYTQIK-	#
tam504_all	enolase [Nocardia cyriacigeorgica GUH-2]	gi%7c379710832 gi%7c504118868 gi%7c374848331	44969	119	5	2	0.04	MAIIEQVGAREILDSRGNPTVEVEIALDDGTLTRAAVPSGASTGEHEAVELRDGGDRYLGKGVQKAVEGVLDEIAPAVIGLDAVEQRTVDQVLLDLDGTPDKSRLGANALLGVSLSVARAAAESSGLELFRYLGGPNAHVLPVPMMNILNGGAHADTGVDVQEFMVAPIGAPTFKESLRWGAEVYHALKSVLKSKGLATGLGDEGGFAPDVAGTREALDLISSAIAKTGLKLGSDVALALDVAATEFYSDAGYKFEGNVRTAAEMAQFYADLLTAYPLVSIEDPLSEDDWDGWVALTDQIGDKIQLVGDDLFVTNPERLEEGISKGAANALLVKVNQIGTLTETLDAVELAHRNGYKTMMSHRSGETEDTTIADLAVAVGSGQIKTGAPARSERVAKYN…	2.5	AAAESSGLELFR-YAGDVAFPR-	#
tam504_all	phosphopyruvate hydratase [Nocardia farcinica IFM 10152]	gi%7c54026833 gi%7c499524754 gi%7c59797496 gi%7c54018341	44966	119	5	2	0.04	MAIIEQVGAREILDSRGNPTVEVEIALDDGTLTRAAVPSGASTGEHEAVELRDGGDRYNGKGVLKAVEGVLDEIAPAVIGLDAVEQRTVDQVLLDLDGTPDKSRLGANALLGVSLAVARAAAESSGLELFRYLGGPNAHVLPVPMMNILNGGAHADTGVDVQEFMVAPIGAPTFKESLRWGAEVYHALKAVLKSKGLSTGLGDEGGFAPDVAGTREALDLIAQAIAKTGLKLGSDVALALDVAATEFYTSGSGYKFEGTVRSAEEMAQFYSELLGAYPLVSIEDPLSEDDWDGWVALTDQIGDKIQLVGDDLFVTNPERLEDGIAKGAANALLVKVNQIGTLTETLDAVELAHRNGYKTMMSHRSGETEDTTIADLAVAVGSGQIKTGAPARSERVAKY…	2.5	AAAESSGLELFR-YAGDVAFPR-	#
tam504_all	hypothetical protein [Rhodococcus triatomae]	gi%7c494798002 gi%7c452761418	67892	88	5	2	0.03	MVTPAETQAAQEPVAAPRTAPAAPQTSPAEQPPAANKAQSGRARTSGDGEKAGRRRKSQGGSNRPQRQPKGRPDGIASVDPTERLGLPPKAPKNGLRVVALGGIGEIGRNMTVFEHQGKLLIVDCGVLFPEDQQPGVDLILPDFAHIEDRMEDVVAVVLTHGHEDHIGAVPFLLRLRPDVPVIGSRFTLALVAAKCREHRQRPNLVEVVEGQITTHGPFECEYFAVNHSIPDAIAVAIKTSAGVALHTGDIKLDQLPLDGRLTDLAGFSRLGDEGVDLFLVDSTNAEVPGFVTPEREIGGVLDGVIGKAKQRVIVASFASHVHRIQQVVDVAVRYNRRIAFVGRSMVRNMQIAQDLGYLTVPDGVVVDIDTAANLPDDRLVLISTGSQGEPLSALSRMA…	2.5	KSQGGSNRPQR-VVALGGIGEIGR-	#
tam504_all	ARP2/3 complex 20 kDa subunit [Beauveria bassiana ARSEF 2860]	gi%7c400595507	23437	81	5	2	0.09	MHTSFRGSAPPSSSDAGQSNKQQHHDERPAAASLVPAMSQSLRPYLQCVRSSLTAALTLSNFASQTAERHNVPEIEAQSSPEVLLTPLTVARNENERVLIEPSINSIRISIKIKQADEIEHILVHKFTRFLTQRAESFFILRRKPIKGYDISFLITNFHTDEMLKHKLVDFIIQFMEDVDKEISEMKLFLNARARFVAESFLTPFN	2.5	AESFFILR-FVAESFLTPFN-	#
tam504_all	hypothetical protein REQ_22570 [Rhodococcus equi 103S]	gi%7c312139655 gi%7c503181312 gi%7c311888994	42018	87	4	2	0.06	MAALIVLAVLVVLVVILVAKSVALVPQAEAAVIERLGRYARTVSGQLTFLVPFVDRIRAKVDLRERVVSFAPQPVITQDNLTLSIDTVVYFQVTNPQAAVYEISNYIAAVEQLTITTLRNVVGGMTLEETLTSRDSINGQLRGVLDEATGRWGLRVARVELKSIDPPPSIQESMEKQMKADREKRAMILTAEGHRESAIKTAEGAKQSQILAAEGAKQASILGAEGERQSRILRAQGERAAKYLQAQGQAKAIEKVFAAIKSGKPTPELLAYQYLQTLPQMAQGDANKVWLVPSDFGDALKGFAKTLGAPGDDGVFRYEPSRTEDENLPRPEDDSDEVASWFETKADPAVAQAVRAAEAVARTPVESPLSQEHLLGGGEQPEGLPPGQA	2	TVSGQLTFLVPFVDR-GVLDEATGR-	#
tam504_all	alpha tubulin_ partial [Synchaeta pectinata]	gi%7c403492658	33758	109	3	2	0.04	AVFVDLEPTVXDEVRTGTYRQXFHPEQLITGKEDAANNXARGHYTIGKEXVDLVLDRXRKLADQCTGLQGFLIFHSFGGGTGSGFTSLLMERLSVDYGKKSKLEFAVYPAPQISTAVVEPYNSILTTHTTLEHSDCAFMVDNEAIYDICRRNLDIERPTYTNLNRLIAQXVSSITASLRFDGALNVDLTEFQTNLVPYPRIHFPLATYAPIISAEKAYHEQLTVAEITNAVFEPANQMVKCDPRXGKYMACCMLYRGDVVPXDVNAAIATIKTKRTIQFVDWCPTGFKVGINYQPPTVVXGGXL	1.5	LIAQPVSSITASLR-LIAQVVSSITASLR-	#
	Sample 8#
	20mg
	Sesam seed storage proteins
20140828-tam517r2	11S globulin seed storage protein 2 [sesamum indicum]	75315270	51798	1808	3275	35	0.66	MVAFKFLLALSLSLLVSAAIAQTREPRLTQGQQCRFQRISGAQPSLRIQSEGGTTELWDERQEQFQCAGIVAMRSTIRPNGLSLPNYHPSPRLVYIERGQGLISIMVPGCAETYQVHRSQRTMERTEASEQQDRGSVRDLHQKVHRLRQGDIVAIPSGAAHWCYNDGSEDLVAVSINDVNHLSNQLDQKFRAFYLAGGVPRSGEQEQQARQTFHNIFRAFDAELLSEAFNVPQETIRRMQSEEEERGLIVMARERMTFVRPDEEEGEQEHRGRQLDNGLEETFCTMKFRTNVESRREADIFSRQAGRVHVVDRNKLPILKYMDLSAEKGNLYSNALVSPDWSMTGHTIVYVTRGDAQVQVVDHNGQALMNDRVNQGEMFVVPQYYTSTARAGNNGFEWV…	93.5714	ISGAQPSLR-ISGAQPSLRIQSEGGTTELWDER-IQSEGGTTELWDER-STIRPNGLSLPNYHPSPR-LVYIER-TMERTEASEQQDRGSVR-AFYLAGGVPR-SGEQEQQARQTFHNIFR-QTFHNIFR-AFDAELLSEAFNVPQETIR-AFDAELLSEAFNVPQETIRR-RMQSEEEERGLIVMAR-MQSEEEERGLIVMAR-GLIVMAR-ERMTFVRPDEEEGEQEHR-MTFVRPDEEEGEQEHR-MTFVRPDEEEGEQEHRGR-READIFSR-EADIFSR-VHVVDRNKLPILK-YMDLSAEK-YMDLSAEKGNLYSNALVSPDWSMTGHTIVYVTR-GNLYSNALVSPDWSMTGHTIVYVTR-GDAQVQVVDHNGQALMNDR-GDAQVQVVDHN…	#
20140828-tam517r2	11S globulin precursor isoform 4 [Sesamum indicum]	81238594	52650	1429	3173	32	0.52	MAKLFLSLLTFLLLFSLSFALRGSTWQQGQCRISRINAQEPTRRIQAEGGVSEFWDHNSDEFQCAGVSIHRHRLQARALMLPAYHNAPILAYVQQGRGMYGVMISGCPETFESSQQQFEEGRGAQRFRDRHQKIGQFREGDILAFPAGAAHWAYNNGDQELVIVVLQDNANNANQLDPNPRSFFLAGNPAGRGQEQQEYAPQLGRKRGQHQFGNVFRGFDVQILSEVFGVDEQAARSLQGENDERGHIITVARGLQVISPPLQREEYGRQEEEPYYGRRDNGLEETICSAKLRENIDKPSRADIYNPRAGRFSTINSLTLPILSFLQLSAARGVLYRNGIMAPHWCVNAHSVIYVTRGESDMQIVSHNGQAVFDGRVREGQVVVVPQNFAVVKRAGEQG…	99.1562	ISRINAQEPTR-ISRINAQEPTRR-INAQEPTR-INAQEPTRR-ALMLPAYHNAPILAYVQQGR-EGDILAFPAGAAHWAYNNGDQELVIVVLQDNANNANQLDPNPR-SFFLAGNPAGR-SFFLAGNPAGRGQEQQEYAPQLGR-SFFLAGNPAGRGQEQQEYAPQLGRK-GQEQQEYAPQLGR-GQEQQEYAPQLGRK-RGQHQFGNVFR-GQHQFGNVFR-SLQGENDERGHIITVAR-GHIITVAR-GLQVISPPLQR-EEYGRQEEEPYYGR-QEEEPYYGR-LRENIDKPSR-LRENIDKPSRADIYNPR-ADIYNPR-ADIYNPRAGR-FSTINSLTLPILSFLQLSAAR-VREGQVVVVPQNFAVVK-VREGQVVVVPQNFAVVKR-EGQV…	#
20140828-tam517r2	11S globulin precursor isoform 3 [Sesamum indicum]	81238592	55306	1503	2718	27	0.49	MANSLLLLSLSLSFLFLFHGCVAQLELQQQRYWQSLQQHQQHRLRAKTECQVQQLTARQPSSRLQSEAGVTEFWDANNEEFQCAGIEFVRHTIQPRGLLLPYYTNAPQLVYIVRGSGIQGTVIPGCAETYESESGVGSTGEEEGRQRTDRHQKLRRFRRGDVLALREGVTHWAYNDGDTPIISVSIRDVANEANQLDLKFRKFFLAGNPQTAQFQGQQEREQQPRGEGRRGQEEGQGTSNIFNGFNEEFLAESFNTDPQLIRKLQSREDNRGIIVRAERPLRLVLPEYGREEQQRQREQGRGGGYMNGLEETICSLRIRENIEHTAATHSYNPRGGRISTINSQTLPILSQLRLSAEKGVLYRNGITAPHWSTNSHSALYVTRGSARIQVVGHKGRSVL…	100.667	YWQSLQQHQQHR-RGDVLALR-EGVTHWAYNDGDTPIISVSIR-EGVTHWAYNDGDTPIISVSIRDVANEANQLDLK-DVANEANQLDLK-DVANEANQLDLKFR-KFFLAGNPQTAQFQGQQER-KFFLAGNPQTAQFQGQQEREQQPR-FFLAGNPQTAQFQGQQER-FFLAGNPQTAQFQGQQEREQQPR-LVLPEYGR-LVLPEYGREEQQR-LVLPEYGREEQQRQR-IRENIEHTAATHSYNPR-ENIEHTAATHSYNPR-ISTINSQTLPILSQLR-ISTINSQTLPILSQLRLSAEK-LSAEKGVLYR-NGITAPHWSTNSHSALYVTR-SVLNEEVNEGQLVVVPQNFALAIR-AGEQGFEYVTFR-AGEQGFEYVTFRTNDNAMKSELA…	#
20140828-tam517r2	11S globulin [Sesamum indicum]	13183173	56553	1151	1309	22	0.44	MALTSLLSFFIVVTLLIRGLSAQLAGEQDFYWQDLQSQQQHKLQARTDCRVERLTAQEPTIRFESEAGLTEFWDRNNQQFECAGVAAVRNVIQPRGLLLPHYNNAPQLLYVVRGRGIQGTVIPGCAETFERDTQPRQDRRRRFMDRHQKVRQFRQGDILALPAGLTLWFYNNGGEPLITVALLDTGNAANQLDQTFRHFFLAGNPQGGRQSYFGRPQTEKQQGETKNIFNGFDDEILADAFGVDVQTARRLKGQDDLRGRIVRAERLDIVLPGEEEEERWERDPYSGANGLEETLCTAKLRENLDEPARADVYNPHGGRISSLNSLTLPVLSWLRLSAEKGVLYRNGLVAPHWNLNAHSIIYITRGSGRFQVVGHTGRSVFDGVVREGQLIIVPQNYVV…	59.5	LTAQEPTIR-GLLLPHYNNAPQLLYVVR-HFFLAGNPQGGR-QSYFGRPQTEK-LKGQDDLRGR-LDIVLPGEEEEER-LDIVLPGEEEEERWER-LRENLDEPAR-LRENLDEPARADVYNPHGGR-ISSLNSLTLPVLSWLR-LSAEKGVLYR-NGLVAPHWNLNAHSIIYITR-GSGRFQVVGHTGR-FQVVGHTGR-SVFDGVVR-SVFDGVVREGQLIIVPQNYVVAK-EGQLIIVPQNYVVAK-RASQDEGLEWISFK-ASQDEGLEWISFK-ASQDEGLEWISFKTNDNAMTSQLAGR-TNDNAMTSQLAGR-AMPEEVVMTAYQVSR-	#
20140828-tam517r2	7S globulin [Sesamum indicum]	13183177	67027	344	258	6	0.11	MSCGGRLCLVLFALLLASAVVASESKDPELKQCKHQCKAQQQISKEQKEACIQACKEYIRQKHQGEHGRGGGDILEEEVWNRKSPIERLRECSRGCEQQHGEQREECLRRCQEEYQREKGRQDDDNPTDPEKQYQQCRLQCRRQGEGGGFSREHCERRREEKYREQQGREGGRGEMYEGREREEEQEEQGRGRIPYVFEDQHFITGFRTQHGRMRVLQKFTDRSELLRGIENYRVAILEAEPQTFIVPNHWDAESVVFVAKGRGTISLVRQDRRESLNIKQGDILKINAGTTAYLINRDNNERLVLAKLLQPVSTPGEFELFFGAGGENPESFFKSFSDEILEAAFNTRRDRLQRIFGQQRQGVIVKASEEQVRAMSRHEEGGIWPFGGESKGTINIYQ…	43	IPYVFEDQHFITGFR-INAGTTAYLINR-SFSDEILEAAFNTR-NVMNQLER-ELAFGMPAR-SQQEEFFFK-	#
20140828-tam517r2	2S albumin [Sesamum indicum]	13183175	17492	148	120	2	0.15	MAKKLALAAVLLVAMVALASATTYTTTVTTTAIDDEANQQSQQCRQQLQGRQFRSCQRYLSQGRSPYGGEEDEVLEMSTGNQQSEQSLRDCCQQLRNVDERCRCEAIRQAVRQQQQEGGYQEGQSQQVYQRARDLPRRCNMRPQQCQFRVIFV	60	QAVRQQQQEGGYQEGQSQQVYQR-QQQQEGGYQEGQSQQVYQR-	#
20140828-tam517r2	oleosin [Sesamum indicum]	10834827	17362	93	24	2	0.13	MADRDRPHPHQIQVHPQHPHRYEGGVKSLLPQKGPSTTQILAIITLLPISGTLLCLAGITLVGTLIGLAVATPVFVIFSPVLVPAAILIAGAVTAFLTSGAFGLTGLSSLSWVLNSFRRATGQGPLEYAKRGVQEGTLYVGEKTKQAGEAIKSTAKEGGREGTART	12	ATGQGPLEYAK-GVQEGTLYVGEK-	#
	Animal blood proteins
20140828-tam517r2	Hemoglobin subunit beta-C(NA) [multiple rumunants]	122549	15623	487	118	9	0.31	PBKALITGFWSKVKVBZVGAZALGRLLVVYPWTZRFFZHFGBLSSABAVMBBAKVKAHGKKVLBSFSBGLKHLBBLKGAFASLSZLHCBKLHVBPZBFRLLGBVLVVVLARHFGKZFBPZLZAZFZKVVAGVASALAHRYH	13.1111	VKVDEVGAEALGR-VDEVGAEALGR-VDEVGAQALGR-VDEVGAEALGR-VDQVGAEALGR-VDEVGAEALGR-VDQVGAEALGR-VDEVGAEALGR-VDEVGAQALGR-VDEVGAEALGR-VDEVGAQALGR-VDEVGAEALGR-VDEVGAQALGR-VDEVGAEALGR-LLVVYPWTQR-LLVVYPWTER-LHVDPEDFR-LLGNVLVVVLAR-LLGDVLVVVLAR-	#
20140828-tam517r2	albumin precursor [Capra hircus][Pantholops hodgsonii][Ovis aries]	193085052, 556777536, 57164373	66270	323	40	8	0.11	DTHKSEIAHRFNDLGEENFQGLVLIAFSQYLQQCPFDEHVKLVKELTEFAKTCVADESHAGCDKSLHTLFGDELCKVATLRETYGDMADCCEKQEPERNECFLKHKDDSPDLPKLKPEPDTLCAEFKADEKKFWGKYLYEVARRHPYFYAPELLYYANKYNGVFQECCQAEDKGACLLPKIETMREKVLASSARQRLRCASIQKFGERALKAWSVARLSQKFPKADFTDVTKIVTDLTKVHKECCHGDLLECADDRADLAKYICDHQDTLSSKLKECCDKPVLEKSHCIAEIDKDAVPENLPPLTADFAEDKEVCKNYQEAKDVFLGSFLYEYSRRHPEYAVSVLLRLAKEYEATLEDCCAKEDPHACYATVFDKLKHLVDEPQNLIKKNCELFEKHGE…	5	YLYEVAR-DVFLGSFLYEYSR-RHPEYAVSVLLR-HPEYAVSVLLR-HLVDEPQNLIK-KAPQVSTPTLVEISR-APQVSTPTLVEISR-QTALVELLK-	#
20140828-tam517r2	hemoglobin subunit beta [Ovis aries][Capra hircus][Ovis aries musimon][Ovis aries]	164448674, 548495498, 86129747, 86450982	15993	390	134	7	0.44	MLTAEEKAAVTGFWGKVKVDEVGAEALGRLLVVYPWTQRFFEHFGDLSSADAVMNNAKVKAHGKKVLDSFSNGVQHLDDLKGTFAQLSELHCDKLHVDPENFRLLGNVLVVVLARHHGSEFTPVLQAEFQKVVAGVANALAHRYH	19.1429	AAVTGFWGK-VKVDEVGAEALGR-VDEVGAEALGR-LLVVYPWTQR-LHVDPENFR-LLGNVLVVVLAR-VVAGVANALAHR-	#
20140828-tam517r2	vimentin [Ovis aries][Pantholops hodgsonii][Bos taurus]	145226795, 556775761, 110347570	53667	171	15	5	0.13	MSTRSVSSSSYRRMFGGPGTASRPSSTRSYVTTSTRTYSLGSALRPSTSRTLYTSSPGGVYATRSSAVRLRSGVPGVRLLQDSVDFSLADAINTEFKNTRTNEKVELQELNDRFANYIDKVRFLEQQNKILLAELEQLKGQGKSRLGDLYEEEMRELRRQVDQLTNDKARVEVERDNLAEDIMRLREKLQEEMLQREEAESTLQSFRQDVDNASLARLDLERKVESLQEEIAFLKKLHDEEIQELQAQIQEQHVQIDMDVSQPDLTAALRDVRQQYESVAAKNLQEAEEWYKSKFADLSEAANRNNDALRQAKQESNEYRRQVQSLTCEVDALKGTNESLERQMREMEENFSVEAANYQDTIGRLQDEIQNMKEEMARHLREYQDLLNVKMALDIEIAT…	3	MFGGPGTASRPSSTR-TYSLGSALRPSTSR-TLYTSSPGGVYATR-LGDLYEEEMR-EEAESTLQSFR-	#
20140828-tam517r2	hemoglobin alpha	229335	15064	161	46	4	0.25	VLSAABKSBVKAAWGKVGGBAAGYGAEALZRMFLSFPTTKTYFPHFDLSHGSAZVKGHGQKVAAALTKAVGHLBZLPGTLSZLSZLHAHKLRVDPVBFKLLSHSLLVTLACHLPBDFTPAVHASLBKFLABVSTVLTSKYR	11.5	VGGNAAGYGAEALER-VGGDAAGYGAEALER-VGGNAAGYGAEALER-VGGDAAGYGAEALER-VGGNAAGYGAEALER-VGGDAAGYGAEALER-VGGNAAGYGAEALER-VGGDAAGYGAEALER-MFLSFPTTK-FLADVSTVLTSK-	#
	Milk proteins
20140828-tam517r2	alpha-S1-casein precursor [Bos taurus]	30794348	24513	170	95	4	0.23	MKLLILTCLVAVALARPKHPIKHQGLPQEVLNENLLRFFVAPFPEVFGKEKVNELSKDIGSESTEDQAMEDIKQMEAESISSSEEIVPNSVEQKHIQKEDVPSERYLGYLEQLLRLKKYKVPQLEIVPNSAEERLHSMKEGIHAQQKEPMIGVNQELAYFYPELFRQFYQLDAYPSGAWYYVPLGTQYTDAPSFSDIPNPIGSENSEKTTMPLW	23.75	HQGLPQEVLNENLLR-FFVAPFPEVFGK-YLGYLEQLLR-VPQLEIVPNSAEER-	#
20140828-tam517r2	CSN2 protein [Bos taurus]	gi%7c83406093	25200	107	117	2		MKVLILACLVALALARELEELNVPGEIVESLSSSEESITRINKKIEKFQSEEQQQTEDELQDKIHPFAQTQSLVYPFPGPIHNSLPQNIPPLTQTPVVVPPFLQPEVMGVSKVKEAMAPKHKEMPFPKYPVEPFTERQSLTLTDVENLHLPLPLLQSWMHQPHQPLPPTVMFPPQSVLSLSQSKVLPVPQKAVPYPQRDMPIQAFLLYQEPVLGPVRGPFPIIV	58.5	YPVEPFTER-DMPIQAFLLYQEPVLGPVR-	#
	Non-oilseed plants
20140828-tam517r2	Alpha-amylase/trypsin inhibitor CM3 [Aegilops tauschii][Triticum aestivum][Triticum durum]	475546433 or 39578552 or 38098487	24232	90	37	2	0.1	MACKSSCNLLLLAAVLLSVVAAASPSGSCVPGVAFRTDLLPHCRDYVLQQTCGTFTPGSKLPEWMTSASIFSPMKPYLAKFCVPGVAFRTDLLPHCRDYVLQQTCGTFTPGSKLPEWMTSASIFSPMKPYLAKLYCCQELAEIPQQCRCEALRYFIALPVPSQPVDPRSGNVGESGLIDLPGCPRQMQWDFVRLLVAPGQCNLATIHNVRYCPAVEQPLWI	18.5	YFIALPVPSQPVDPR-QMQWDFVR-	#
20140828-tam517r2	globulin 3 [Triticum aestivum]*	215398470	66310	132	39	5	0.07	MATRARVTIPLLFLLGTSLLFAAAVSASHDEEEDRRGGRSLQQCVQRCQQDRPRYSHARCVQECRDDQQQHGRHEQEEQGRGHGRHGEGEREEEQGRGRGRHGQGEREEEQGRGRGRRGEGERDEEHGDGRRPYVFGPRSFRRIIRSDHGFVKALRPFDEVSRLLRGIRNYRVAIMEVNPRAFVVPGLTDADGVGYVAQGEGVLTVIENGEKRSYTVRQGDVIVAPAGSIMHLANTDGRRKLVIAKILHTISVPGKFQYFSAKPLLASLSKRVLTAALKTSDERLGSLLGSRQGKEEEEKSISIVRASEEQLRELRRQASEGDQGHHWPLPPFRGDSRDTFNLLEQRPKIANRHGRLYEADARSFHALAQHDVRVAVANITPGSMTAPYLNTQSFKLAV…	7.8	RPYVFGPR-ALRPFDEVSR-VAIMEVNPR-SFHALAQHDVR-EVQEVFR-	#
20140828-tam517r2	protein z-type serpin [Hordeum vulgare subsp. vulgare]*	1310677	43193	142	35	3	0.08	MATTLATDVRLSIAHQTRFALRLASAISSNPERAAGNVAFSPLSLHVALSLITAGAGGATRDQLVAILGDGGAGDAKELNALAEQVVQFVLANESSTGGPRIAFANGIFVDASLSLKPSFEELAVCQYKAKTQSVDFQHKTLEAVGQVNSWVEQVTTGLIKQILPPGSVDNTTKLVLGNALYFKGAWDQKFDESNTKCDSFHLLDGSSIQTQFMSSTKKQYISSSDNLKVLKLPYAKGHDKRQFSMYILLPGAQDGLWSLAKRLSTEPEFIENHIPKQTVEVGRFQLPKFKISYQFEASSLLRALGLQLPFSEEADLSEMVDSSQGLEISHVFHKSFVEVNEEGTEAGAATVAMGVAMSMPLKVDLVDFVANHPFLFLIREDIAGVVVFVGHVTNPLISA	11.6667	ATTLATDVR-LASAISSNPER-ISYQFEASSLLR-	#
20140828-tam517r2	globulin-1 S allele precursor [Zea mays] or [Sorghum bicolor]*	195658011 or 241920164	49933	139	17	2	0.04	MKVPVLLLLVSLCFSLALAWQTDTESGSGRPYHYGEESFRHWTRSRQGRFRVLERFTHELLEDAVGNYRVAELEAAPRTFLQPSHYDADEVMFVKEGEGVIVLLRGGKRESFCVREGDVMVIPAGAVVYSANTHQSEWFRVVMLLSPVVSTSGRFEEFFPIGGESPESFLSVFSDDVIQASFNTRREEWEKVFEKQSKGEITTASEEQIRELSRSCSRGGRGSRGEGGDSGSSSSSKWEIKPSSLTDKKPTHSNSHGRHYEITGDECPHLRLLDMDVGLANIARGSMMAPSYNTRANKIAIVLKGQGYFEMACPHVSGGRSSPRRERGHGREEEEEREEEQGGGGGQKARSYRQVKSRIREGSVIVIPAGHPTALVAGEDKNLAVLCFEVNASFDDKVF…	8.5	VAELEAAPR-EGEGVIVLLR-	#
	Mold
[truncated: 821 more rows]
