# Supplementary material for: Open sesame: Identification of sesame oil and oil soot ink in organic deposits of Tang Dynasty lamps from Astana necropolis in China
Source: PLoS One. 2017 Feb 24;12(2):e0158636. doi: 10.1371/journal.pone.0158636 (PMC5325208; doi:10.1371/journal.pone.0158636)
Supplement: S2 Dataset — (XLS) [file pone.0158636.s002.xls]

## Sheet: archeo
				S2 Supplementary Dataset
			(species abundances are in mol%)
				TAG species detected in Astana archaeological samples										TAG species detected in modern sesame oil
Species	1#b	1#b STD	2#	2# STD	7#	7# STD	8#	8# STD	3#	3# STD			Species	sesam_oil	sesam_oil STD
TG 42:0:0	0.281337	0.0292	0.0843	0.00547	0.0298	0.00229	0.809005	0.00729719	0.0293456	8.5203e-05			TG 48:3:0	0.00718283	0.000323497
TG 42:1:0	0.0333	0.00604	0.0252	0.00796			0.083663	0.00823579	0.0115989	0.00367007			TG 48:2:0	0.0138932	0.00137151
TG 44:0:0	1.27375	0.0839	0.32397	0.0217	0.0995	0.00603	1.56169	0.01058	0.250948	0.00159826			TG 48:1:0	0.0149058	0.00380952
TG 44:1:0	0.0449	0.0109	0.0338	0.00893	0.0122	0.0172	0.173056	0.0374321	0.0123348	0.000465528			TG 48:0:0	0.0241119	0.000410336
TG 45:0:0	0.535203	0.0348	0.202753	0.0112	0.068	0.00136	0.609649	0.0330454	0.214406	9.41025e-05			TG 49:1:0	0.00805487	0.00173721
TG 46:0:0	4.63948	0.132485	1.53707	0.027	1.16598	0.00441	3.36893	0.0130891	2.12208	5.973e-05			TG 50:5:0	0.00810277	0.00141159
TG 46:1:0	0.145411	0.0206	0.0768	0.00621	0.0346	0.000681	0.410141	0.0832605	0.0492914	0.000128088			TG 50:4:0	0.0278659	5.40475e-05
TG 46:2:0	0.016	0.0226	0.0117	0.0166			0.0955747	0.0469359	0.0118164	0.000754671			TG 50:3:0	0.0936291	0.000435373
TG 47:0:0	1.80657	0.0363	0.98374	0.0294	0.608624	0.00664	1.48955	0.00406337	1.40741	0.00405901			TG 50:2:0	1.58637	0.00944443
TG 47:1:0	0.0954	0.00693	0.0805	0.00973	0.0354	0.00375	0.225879	0.073019	0.0846678	0.00183892			TG 50:1:0	0.806924	0.00205886
TG 47:2:0	0.0332	0.0037	0.0102	0.0145			0.0908836	0.0446122	0.0283445	0.00164081			TG 51:4:0	0.00673443	0.00181681
TG 48:0:0	11.156	0.0194	6.16394	0.0138	6.77421	0.0912	7.4588	0.0859194	8.43619	0.0128474			TG 51:3:0	0.0138573	0.00053572
TG 48:1:0	0.900983	0.0582	0.640106	0.0507	0.3916	0.00467	1.31309	0.0741726	0.560943	0.00143443			TG 51:2:0	0.0210384	0.00025769
TG 48:2:0	0.051	0.00252	0.0443	0.0101	0.0354	0.00504	0.214884	0.0962636	0.0483466	0.00110469			TG 51:1:0	0.0168413	0.000513963
TG 49:0:0	3.88885	0.0473	3.06254	0.0103	2.47164	0.00834	2.96338	0.0362574	3.88451	0.00138092			TG 52:6:0	0.0138927	7.65377e-05
TG 49:1:0	0.397157	0.0243	0.450756	0.0294	0.244427	0.0012	0.636706	0.0460108	0.467165	0.00572549			TG 52:5:0	0.249897	0.0012474
TG 49:2:0	0.0585	0.0067	0.0374	0.0109	0.0266	0.00239	0.132121	0.0751405	0.107752	0.00322736			TG 52:4:0	7.13537	0.0103519
TG 50:0:0	17.366	0.30523	13.9343	0.3619	16.9501	0.0406	14.387	0.30635	14.6527	0.0253923			TG 52:3:0	9.57227	0.0105441
TG 50:1:0	3.65336	0.185571	3.9842	0.270378	3.09519	0.0114	4.14299	0.0158368	3.72799	0.011874			TG 52:2:0	6.71914	0.0148378
TG 50:2:0	0.268829	0.0203	0.40051	0.0294	0.226958	0.00429	0.717323	0.0906819	0.314768	0.00342196			TG 52:1:0	0.340724	0.00259516
TG 51:0:0	4.75077	0.0816	4.73289	0.0552	4.3818	0.049	3.92237	0.0689305	4.91902	0.0132592			TG 52:0:0	0.181659	0.00149549
TG 51:1:0	1.02494	0.0372	1.59248	0.0974	0.98847	0.00425	1.09868	0.0171239	1.40976	0.00350304			TG 53:5:0	0.0157702	0.00189966
TG 51:2:0	0.0843	0.015	0.145486	0.00806	0.0845	0.00527	0.184847	0.0457129	0.20474	0.004638			TG 53:4:0	0.050482	0.00291221
TG 52:0:0	18.766	0.383961	18.878	0.871102	23.8313	0.0473	18.9749	0.299617	15.8232	0.0545923			TG 53:3:0	0.0619084	0.00161892
TG 52:1:0	6.87501	0.146196	11.174	0.59897	8.70518	0.0279	6.78539	0.0686446	10.6361	0.0270301			TG 53:2:0	0.033594	0.000822426
TG 52:2:0	0.827433	0.052	1.53048	0.0959	1.10243	0.00277	1.32942	0.0193868	1.2131	0.00848601			TG 54:7:0	0.222411	0.00176623
TG 52:3:0	0.0882	0.0113	0.183119	0.0215	0.0894	0.0036	0.224753	0.0529571					TG 54:6:0	12.0799	0.0183226
TG 52:4:0	0.169322	0.0128	0.175168	0.00465	0.0282	0.0018	0.0638284	0.0172283					TG 54:5:0	20.9289	0.0371961
TG 53:0:0	2.90208	0.0519	3.01555	0.114809	3.12989	0.0234	2.75401	0.0197848	2.57432	0.00880943			TG 54:4:0	21.0204	0.0150699
TG 53:1:0	1.07081	0.0435	2.16042	0.0853	1.38366	0.000596	0.971041	0.0263592	1.92348	0.00747149			TG 54:3:0	13.4351	0.0309005
TG 53:2:0	0.122179	0.00623	0.27614	0.0148	0.171011	0.00286	0.144861	0.0429343	0.218031	0.000544857			TG 54:2:0	2.98464	0.00849526
TG 54:0:0	8.42433	0.345346	7.48645	0.628351	11.3551	0.0747	10.1065	0.148852	5.42758	0.0396155			TG 55:8:0	0.130353	0.00718714
TG 54:1:0	5.18821	0.0853	11.2885	0.389279	8.71523	0.0687	5.40171	0.00777359	12.6634	0.0297093			TG 55:7:0	0.110268	0.00532793
TG 54:2:0	0.883846	0.024	2.15985	0.14525	1.60254	0.0182	1.04498	0.0113993	1.74795	0.00820816			TG 55:6:0	0.00663672	0.00207443
TG 54:3:0	0.154973	0.0153	0.356356	0.0339	0.197933	0.00108	0.17296	0.0113886	0.121206	0.000177505			TG 55:5:0	0.0158739	0.00232376
TG 54:4:0	0.120959	0.007	0.125339	0.015	0.0323	0.0053	0.129499	0.00919341	0.0505322	0.0119312			TG 55:4:0	0.0187127	0.00070898
TG 54:5:0	0.0502	0.00622	0.0148	0.0209									TG 55:3:0	0.0142549	0.000741695
TG 55:0:0	0.431784	0.00873	0.429041	0.0225	0.440438	0.0061	0.547914	0.00754912	0.460084	0.00650503			TG 55:2:0	0.00844516	0.00107519
TG 55:1:0	0.173147	0.00245	0.475163	0.00903	0.285653	0.00893	0.255018	0.000272875	0.542884	0.00130812			TG 55:1:0	0.00875809	0.00064581
TG 55:2:0	0.0499	0.015	0.0768	0.000937	0.0498	0.00348	0.0961753	0.0128775	0.062252	0.000184556			TG 56:6:0	0.0208938	0.000604422
TG 56:0:0	0.376238	0.0235	0.404009	0.0127	0.379267	0.0152	0.431929	0.00461315	0.487323	0.00538217			TG 56:5:0	0.158192	0.0015899
TG 56:1:0	0.17876	0.00611	0.452002	0.0123	0.259375	0.00784	1.09453	0.0211627	0.687251	0.00132378			TG 56:4:0	0.490082	0.00222056
TG 56:2:0	0.048	0.0138	0.0962	0.00626	0.0611	0.00761	0.102866	0.00559058	0.0919576	0.00118881			TG 56:3:0	0.437579	0.00308393
TG 57:0:0	0.0987	0.00196	0.103661	0.00419	0.0821	0.00414	0.149162	0.000884178	0.14467	0.00117427			TG 56:2:0	0.368042	0.0036267
TG 57:1:0	0.0617	0.00736	0.0826	0.0047	0.0544	0.00336	0.153922	0.0141491	0.123248	2.08106e-05			TG 56:1:0	0.0507189	0.00201518
TG 58:0:0	0.110904	0.00484	0.11641	0.00219	0.101444	0.00337	0.0999074	0.00511345	0.167617	0.00153598			TG 57:3:0	0.00830876	0.000611651
TG 58:1:0	0.0745	0.0149	0.120243	0.00796	0.0718	0.00162	0.648092	0.00417468					TG 57:2:0	0.0130089	2.46851e-05
TG 58:2:0			0.0383	0.000612			0.0826713	0.010372	0.0263756	0.00200454			TG 57:1:0	0.0145634	0.00041991
TG 59:0:0	0.0573	0.018	0.0505	0.0171	0.0376	0.0112	0.0707151	0.0120702	0.0477664	0.00242909			TG 58:6:0	0.0167798	0.00290817
TG 59:1:0	0.0493	0.00371	0.0471	0.0122	0.0388	0.000994	0.0798692	0.0101178	0.0517364	0.000168806			TG 58:5:0	0.0101114	0.00011499
TG 60:0:0	0.0442	0.00314	0.0431	0.00361	0.0395	0.00215	0.080465	0.000152443	0.0566006	0.00153337			TG 58:4:0	0.0742533	0.000473971
TG 60:1:0	0.0714	0.0296	0.0437	0.00441	0.0295	0.002	0.0820798	0.00307865	0.0601158	0.00135251			TG 58:3:0	0.0613398	0.000379583
TG 61:0:0	0.0254	0.0359	0.0241	0.0341					0.0133391	0.00070444			TG 58:2:0	0.0902977	0.000506287
TG 61:1:0			0.0139	0.0197					0.0159069	0.000777248			TG 60:4:0	0.0392503	0.00198181
TG 40:0:0							0.374323	0.0162648	0.0119969	0.00129355			TG 60:3:0	0.036807	0.000375478
TG 40:1:0							0.0804683	0.00275897	0.0196239	0.000170571			TG 60:2:0	0.0455035	0.00193629
TG 41:0:0							0.128363	0.000238518	0.00908613	0.000214465			TG 61:3:0	0.00989576	0.000890243
TG 41:1:0							0.0583459	0.00657537	0.0182236	0.00067225			TG 61:2:0	0.010518	0.00039773
TG 41:2:0							0.0684616	0.016303	0.0187818	0.0005189			TG 62:4:0	0.0129298	0.00115073
TG 42:2:0							0.0343191	0.0485346	0.0115853	0.00199542			TG 62:3:0	0.00847207	0.000369068
TG 43:0:0							0.239346	0.0180637	0.0205791	0.00111038			TG 62:2:0	0.0136171	0.000419373
TG 43:1:0							0.0485691	0.00158764	0.0130697	0.000520394
TG 43:2:0							0.0624299	0.00308118	0.0101588	0.000274873
TG 44:2:0							0.0260541	0.0368461	0.0108517	0.000262036
TG 45:1:0							0.100652	0.0346482	0.0151363	0.000257226
TG 45:2:0							0.065394	0.00748527	0.0115201	0.000491324
TG 48:3:0							0.0833732	0.0174998
TG 49:3:0							0.0803873	0.0218556
TG 50:3:0							0.0983805	0.0152242
TG 51:3:0							0.0752859	0.000972568	0.0433188	0.00479801
TG 55:4:0							0.107557	0.0281741	0.07835	0.0028688
TG 62:0:0							0.0646387	0.0357496	0.0299412	0.00209238
TG 62:1:0							0.0342638	0.0484564	0.0239197	0.000126018
TG 32:0:0									0.0681989	0.00292595
TG 32:1:0									0.0234297	0.000737078
TG 32:2:0									0.0110216	0.000986603
TG 33:0:0									0.135088	0.00723232
TG 33:1:0									0.071977	0.00521037
TG 33:2:0									0.0475058	0.0021356
TG 33:3:0									0.0109907	0.000871661
TG 34:0:0									0.168288	0.00594226
TG 34:1:0									0.0861926	0.00334106
TG 34:2:0									0.00987208	0.000717954
TG 35:0:0									0.0473655	0.000842497
TG 35:1:0									0.0234454	0.00154107
TG 35:2:0									0.0129154	0.0002274
TG 36:0:0									0.143233	0.00733644
TG 36:1:0									0.127085	0.00530036
TG 36:2:0									0.0125319	0.000537984
TG 37:0:0									0.0165196	0.000675394
TG 37:1:0									0.0142399	2.47067e-05
TG 38:0:0									0.0155995	0.000730218
TG 38:1:0									0.0180698	9.80552e-05
TG 38:2:0									0.0105212	0.000101761
TG 39:0:0									0.00909175	0.00112103
TG 39:1:0									0.0185476	0.000838266
TG 39:2:0									0.0107088	0.000471077
TG 40:2:0									0.013387	0.0016037
TG 40:3:0									0.00995759	0.00254641
TG 41:3:0									0.0103359	0.00176108
TG 42:3:0									0.0079669	0.000837777
TG 43:3:0									0.00984201	0.000433183
TG 45:3:0									0.00745921	0.000594682
TG 46:3:0									0.00754572	0.00125593
TG 57:2:0									0.0174059	0.00030805
TG 59:2:0									0.0161648	0.000310081
TG 60:2:0									0.0139529	0.00129221
TG 64:0:0									0.0171791	0.00224662
TG 64:1:0									0.0161399	0.000414064
				TAG species detected in contemporary adipose fats
Species	pig_adipose	pig_adipose STD	pig_subcutanoeus	pig_subcutaneous STD	cow1	cow1 STD	deer	deer STD	goat	goat STD	calf	calf STD	camel	camel STD	horse	horse SDT	yak	cow2	cow2 STD	lamb	lamb STD
TG 40:0:0	0.00972493	0.000526682	0.00880251	0.000485907	0.0233486	0.00341313	0.0259	0.000123	0.253717	0.00639	0.0760249	0.00299575	0.0240867	0.000387391	0.0320681	0.00261625	0.0226672	0.0256	5.34e-05	0.0404	0.00273
TG 40:1:0	0.00955432	4.21561e-05	0.00935895	0.00110238	0.0168939	0.0028932	0.00962	0.00123	0.0662	0.00346	0.0376589	0.00329692	0.0244351	0.00246277	0.0264856	0.000949406	0.0237693	0.0223	0.00134	0.0192	0.00312
TG 42:0:0	0.0163194	0.00139631	0.0126727	0.00163038	0.0440284	0.00396648	0.115527	0.000501	0.584887	0.00294	0.279604	0.00147911	0.0749212	0.000394165	0.0722613	0.00589465	0.068209	0.0477	0.000809	0.101737	0.00591
TG 42:1:0	0.0140702	0.00236467	0.015132	0.000240958	0.0290083	0.00218414	0.0336	0.00162	0.388648	0.00207	0.153351	0.0101342	0.100025	0.000274937	0.051201	0.00134997	0.058414	0.0358	0.00154	0.0587	0.00627
TG 42:2:0	0.00920058	0.00032418	0.0115575	0.00223728	0.0119664	0.0109667	0.0101	0.00192	0.0776	0.000709	0.0257798	0.00191808	0.0254603	0.000794255	0.018979	0.000460788	0.0283459	0.00985	0.0139	0.0149	0.00175
TG 44:0:0	0.0358825	0.000468157	0.0249097	0.00368	0.176485	0.00192732	0.519458	0.00443	0.804791	0.0022	0.926158	0.0266068	0.417892	0.00196777	0.180103	0.0121016	0.413507	0.168844	0.00914	0.223618	0.00784
TG 44:1:0	0.0541908	0.000117671	0.0580837	0.000889785	0.0814175	0.0290267	0.189113	0.00197	1.35601	0.00837	0.725525	0.0248142	0.3123	0.00345693	0.165416	0.000637987	0.17617	0.108933	0.00651	0.191816	0.0128
TG 44:2:0	0.0335825	0.00222137	0.0430681	0.00133826	0.0236685	0.00237467	0.0471	0.00122	0.316492	0.00434	0.1441	0.00612324	0.0873089	0.00142309	0.0626289	0.00184647	0.07886	0.0201	0.0023	0.046	0.00243
TG 44:3:0	0.0138891	0.00213017	0.0149167	0.000431395	0.00993208	0.0136186	0.0126	0.002	0.0314	0.00191	0.0247098	0.00152721	0.0296093	0.00105655	0.0798456	0.00136504	0.0219606	0.0219	0.0079	0.0163	0.00227
TG 46:0:0	0.0734829	0.00818873	0.0467953	0.00736373	0.891326	0.0114148	2.07374	0.0216	0.950744	0.0126	2.49694	0.111291	1.47447	0.0035854	0.466914	0.0282397	3.20873	0.933547	0.0377	0.594739	0.00679
TG 46:1:0	0.110338	0.000329049	0.110478	0.00121642	0.522895	0.000958088	1.04426	0.00639	4.15612	0.0385	2.77846	0.0469294	1.52211	0.00584535	0.514024	0.00575667	0.750049	0.453698	0.017	0.530048	0.0235
TG 46:2:0	0.12582	0.00368508	0.14357	0.00536737	0.0962602	0.00323117	0.278429	0.0034	1.41628	0.00431	0.712789	0.0279258	0.277643	0.000488348	0.211819	0.00294653	0.27783	0.0857	0.00647	0.177144	0.0105
TG 46:3:0	0.0524493	0.00187491	0.0662898	0.00177067	0.0179275	0.00653621	0.0649	0.000505	0.185781	0.0011	0.136702	0.00664064	0.0621882	0.000198132	0.294987	0.00222871	0.0774275	0.0262	0.00253	0.0574	0.00404
TG 46:4:0	0.0153391	1.71462e-05	0.0213416	0.00097353	0.029743	0.0112459	0.0211	0.000663	0.0428	0.00397	0.0222839	0.00225852	0.00994555	0.00110284	0.0634491	0.000987337	0.0161062	0.004	0.00566	0.0158	0.00116
TG 47:0:0	0.0113637	0.00287369	0.0111786	0.00236811	0.385393	0.00378388	1.22435	0.0104			0.60632	0.0353441	0.45224	0.00530917	0.119298	0.0263528	0.922646	0.619265	0.0369	0.338648	0.00812
TG 47:1:0	0.01422	0.000746762	0.0126934	0.00139898	0.250274	0.00517457	0.682811	0.000244	0.17006	0.00967	0.96088	0.00415084	0.551809	0.00131536	0.265884	0.00331537	0.354554	0.361077	0.00991	0.281212	0.00783
TG 47:2:0	0.0120541	0.00311568	0.0147307	0.00144651	0.0256389	0.00171234	0.143793	0.000857	0.0767	0.00201	0.254942	0.00919609	0.112452	0.0014858	0.176386	0.00417545	0.115324	0.0596	7.96e-05	0.071	0.00408
TG 47:3:0			0.0178849	0.00398366	0.00114894	0.00162578	0.0194	0.000288	0.0213	0.00889	0.0451647	0.00183005	0.0209769	0.000486055	0.0949034	0.000170743	0.0191976	0.0231	0.00496	0.0196	0.00109
TG 48:0:0	0.179781	0.042049	0.0520096	0.0735528	1.55823	0.0328989	3.13226	0.00138			1.38192	0.152662	1.35414	0.0733902	0.25421	0.036483	7.17919	1.91046	0.0519	0.965742	0.0182
TG 48:1:0	0.613601	0.0140989	0.560839	0.00446217	3.49386	0.0307094	4.3512	0.0253	6.48407	0.0154	8.49263	0.0543894	7.13396	0.00795407	1.50314	0.00491236	3.60673	3.12318	0.074	1.7609	0.032
TG 48:2:0	0.429219	0.000354913	0.418524	0.00587969	0.765079	0.00061879	1.3074	0.00339	4.58888	0.0819	2.93977	0.0862575	1.60592	0.00505137	0.686228	0.0200504	1.13498	0.633966	0.0194	0.544649	0.0231
TG 48:3:0	0.117931	0.000374757	0.123374	0.00129155	0.0822507	0.0015798	0.354501	0.00787	1.11197	0.0144	0.656713	0.0147682	0.361422	0.00433879	1.58845	0.00607004	0.305118	0.120387	0.00118	0.172395	0.011
TG 48:4:0	0.0253438	0.00295491	0.0266773	0.0021353	0.018068	0.00792126	0.0856	0.0039	0.163883	0.0109	0.11804	0.00534868	0.0461916	0.0017469	0.396194	0.000170015	0.0543341	0.0245	0.00178	0.0352	0.00232
TG 48:5:0	0.0111201	0.000276405	0.0137487	0.00497616	0.0109914	0.00359703	0.0353	0.000804	0.12277	0.036	0.0127073	0.000379517	0.00917934	0.00351421	0.0497789	0.00180997	0.0162739	0.0105	0.0148	0.0115	0.000235
TG 49:0:0	0.0121021	0.000959932	0.00755165	0.00231916	0.591112	0.0101337	1.64945	0.00286			0.110352	0.0319499	0.34828	0.0104256	0.0212679	0.0300774	1.63384	1.0267	0.0334	0.549652	0.00339
TG 49:1:0	0.056562	0.00165605	0.0512845	0.000219253	1.35323	0.0160198	2.37521	0.0153	0.306266	0.00076	2.31108	0.0105381	1.74024	0.00232413	0.381303	0.00241089	1.2644	1.92996	0.041	1.15	0.0205
TG 49:2:0	0.0529772	0.000885722	0.0572128	0.00115379	0.278815	0.00425465	0.670009	0.00448	0.1944	0.00296	0.819111	0.0172568	0.525603	0.00117029	0.331276	0.000491447	0.480658	0.413053	0.00166	0.368537	0.00815
TG 49:3:0	0.0149726	0.00401287	0.0154978	0.000131767	0.0231488	0.0128187	0.162646	0.000805	0.0376	0.0159	0.192356	0.0055112	0.123502	0.000946687	0.355298	0.00175864	0.0963177	0.0781	0.00309	0.115438	0.00709
TG 49:4:0	0.00958199	0.00338262	0.00871294	0.000845033	0.0500279	0.00138386	0.148319	0.00533			0.0330545	0.00246794	0.018476	0.0032382	0.128276	0.000654111	0.101987	0.0338	0.00161	0.0225	0.00725
TG 50:1:0	4.38095	0.267057	3.792	0.0441787	10.9664	0.0313216	10.5209	0.00129	7.68269	0.042	13.702	0.20841	14.1895	0.113305	1.94682	0.0298601	10.784	10.1407	0.0898	5.3828	0.03
TG 50:2:0	4.49441	0.00405396	4.43289	0.0123361	4.25669	0.0684835	4.69694	0.0227	10.2716	0.0645	7.93993	0.108398	7.14606	0.0215954	3.33476	0.0188441	4.62068	3.46295	0.0253	2.95065	0.0604
TG 50:3:0	1.42943	0.0263866	1.51572	0.0257209	0.55302	0.00242466	1.4963	0.00584	2.88933	0.0507	1.97515	0.0388458	1.47271	0.011063	4.30987	0.000763376	1.2337	0.702931	0.00198	0.931417	0.0191
TG 50:4:0	0.283014	0.00463759	0.309606	0.00746074	0.0507202	0.0119053	0.299715	0.0053	0.423785	0.0106	0.450365	0.0156752	0.274374	0.00151249	2.64571	0.0210835	0.23365	0.129749	0.00365	0.246933	0.0111
TG 50:5:0	0.0275154	0.000451693	0.0318865	0.00378744	0.0594961	0.000124829	0.143828	0.0105	0.0626	0.00306	0.0683676	0.000723423	0.0489259	0.00064853	0.361065	0.00521605	0.0635468	0.0346	0.00853	0.0481	0.00078
TG 50:6:0	0.00881102	0.00124227	0.00683498	0.00966612	0.0111825	0.00057662	0.0395	0.000956	0.0272	0.0093	0.0112732	0.000461345	0.0129107	0.00373415	0.70943	0.00040375	0.0167091	0.0238	0.0115	0.0152	0.000978
TG 51:1:0	0.267743	0.0015652	0.222363	0.00284558	2.35751	0.00393923	3.52312	0.00203	0.199517	0.00481	1.948	0.0363909	2.04857	0.00550141	0.184071	0.00344852	2.06885	3.37312	0.0331	2.31378	0.00474
TG 51:2:0	0.415614	0.00447753	0.438647	0.000271761	1.31813	0.0169171	1.64666	0.00388	0.443304	0.0108	1.80772	0.0395783	1.22051	0.00829735	0.519063	0.00449094	1.23723	1.63899	0.00302	1.48285	0.0273
TG 51:3:0	0.198107	0.0067504	0.227449	0.00238309	0.151029	0.0535281	0.548893	0.00472	0.163814	0.00168	0.452689	0.0140745	0.340138	0.000123494	0.565576	0.00157522	0.328373	0.330064	0.00659	0.51847	0.0166
TG 51:4:0	0.0288867	0.00550143	0.0439948	0.000145479	0.0111863	0.00739701	0.137877	0.00466			0.111058	0.00339261	0.0482294	0.000421056	0.614222	0.00642934	0.105745	0.0617	0.00222	0.1539	0.00625
TG 52:1:0	13.5424	0.0181751	12.2091	0.16298	16.5002	0.13619	11.5606	0.00183	0.578313	0.0934	6.92375	0.233337	10.7198	0.0566478	0.230191	0.01283	13.1318	15.5679	0.0392	10.4091	0.189458
TG 52:2:0	25.5968	0.150879	26.2502	0.0401261	18.3815	0.228518	9.12301	0.00803	18.6115	0.204596	14.655	0.195305	12.6199	0.0307934	6.08374	0.0145201	9.09223	13.6238	0.084	11.6798	0.0502
TG 52:3:0	14.8481	0.224854	15.3267	0.145477	3.49575	0.0689319	3.70866	0.000433	9.01808	0.0874	4.17869	0.0586523	4.34063	0.000944071	6.67892	0.0384	3.07728	3.01945	0.0216	4.60593	0.0721
TG 52:4:0	4.3878	0.110117	4.68242	0.0518912	0.411436	0.202593	1.15096	0.0032	1.72749	0.033	1.45883	0.0241362	1.80502	0.00856664	11.358	0.0112845	0.657827	0.827767	0.00953	1.79243	0.0623
TG 52:5:0	0.576489	0.0271554	0.672903	0.0121227	0.0855298	0.0312419	0.328099	0.0114	0.209376	6.98e-05	0.235857	0.00661656	0.348398	0.0027977	3.35704	0.0527706	0.19177	0.122788	0.00303	0.371849	0.0127
TG 52:6:0	0.0483693	0.00050585	0.069012	0.0137276	0.0577528	0.00789811	0.113025	0.00783	0.0494	0.0236	0.0463063	6.03056e-05	0.0439677	0.00216817	6.61417	0.00105452	0.0359723	0.028	0.00101	0.0841	0.00352
TG 53:1:0	0.100609	0.00522973	0.06276	0.00494758	1.41401	0.033286	1.22648	0.00439	0.00528	0.00402	0.394023	0.0148532	0.82703	0.00152376	0.00145886	0.00206322	1.27462	2.03912	0.00713	1.63052	0.0247
TG 53:2:0	0.43148	0.00443983	0.421713	0.00680334	1.92265	0.0353106	1.14469	0.00348	0.347231	0.00151	1.50051	0.0150671	1.00053	0.00785509	0.269131	9.75725e-06	1.17715	2.18689	0.0044	2.09918	0.0175
TG 53:3:0	0.493273	0.00680592	0.565117	0.0036613	0.364043	0.129708	0.486784	0.000866	0.269842	0.0177	0.576534	0.0190369	0.389813	0.00267176	0.347253	0.000917521	0.480749	0.612959	0.00495	0.923714	0.0128
TG 53:4:0	0.217854	0.0107007	0.287078	0.00159337	0.00655061	0.00926462	0.116081	0.00375	0.0835	0.00684	0.183573	0.00218599	0.0994678	0.00102456	0.581944	0.0065185	0.0970378	0.130105	0.00176	0.348197	0.0215
TG 53:5:0	0.235971	0.0221256	0.19906	0.00545488	0.515839	0.0764692	0.580939	0.0381			0.0638592	0.000477531	0.166602	0.00540656	0.372463	0.00032319	0.207659	0.216785	0.00889	0.173509	0.0257
TG 54:1:0	0.635476	0.0221192	0.467095	0.00141006	6.74845	0.35101	4.72755	0.0121	0.246441	0.00514	0.655842	0.0527345	2.68765	0.0555013	0.164543	0.00180698	5.78135	7.64432	0.0654	7.63334	0.411235
TG 54:2:0	3.78125	0.0662914	3.29026	0.0248593	11.6501	0.0223868	7.84448	0.0136	2.68623	0.0372	5.30452	0.00268092	5.42435	0.0471736	0.495863	0.0150889	6.31973	10.9892	0.192414	14.8869	0.0539
TG 54:3:0	8.04219	0.13037	8.22767	0.00427901	4.69604	0.0405895	4.62357	0.0271	10.4089	0.123152	4.06092	0.0743193	4.86244	0.0176786	6.94083	0.050903	4.15214	4.43206	0.101497	9.98725	0.0248
TG 54:4:0	6.29777	0.0285007	6.65861	0.0734633	0.827355	0.0112768	2.0403	0.00776	4.69204	0.0345	1.25426	0.0214691	2.3708	0.00467532	8.2326	0.0326592	1.06608	1.24638	0.0464	4.36712	0.0835
TG 54:5:0	2.8282	5.35436e-05	3.24537	0.0602888	0.150263	0.0294471	0.664569	0.00564	0.955467	0.0122	0.452785	0.010253	1.58192	0.00299709	8.61812	0.0233292	0.409144	0.292317	0.000789	1.4507	0.025
TG 54:6:0	0.835717	0.00550067	0.992248	0.0253588	0.0685619	0.0263092	0.177242	0.00125	0.139708	0.00374	0.0936642	0.00312309	1.11803	0.00865019	4.31474	0.0450903	0.0934408	0.0684	0.00591	0.354412	0.0112
TG 54:7:0	0.123955	0.00161003	0.152942	0.00199256	0.0197008	0.000695708	0.0444	0.0031	0.0376	0.00973	0.0194169	0.00131655	0.266787	0.002067	4.773	0.0254296	0.0329979	0.0183	0.00199	0.0719	0.00139
TG 54:8:0	0.0145524	0.000296216	0.0132877	0.00445995			0.0189	0.00129					0.0289121	0.000485715	0.743164	0.00104527	0.0193515			0.0171	0.00225
TG 55:1:0	0.0100168	0.00122113	0.00944998	0.00169626	0.0868151	0.0527268	0.164629	0.00146			0.0303507	0.00564525	0.118599	0.00323999	0.0335446	0.00280276	0.190637	0.245759	0.00676	0.173249	0.00304
TG 55:2:0	0.034473	0.00223101	0.0161632	0.0147564	0.277097	0.00124665	0.261759	0.00287	0.0371	0.0054	0.150137	0.00582689	0.177969	0.00155895	0.0306047	0.00356234	0.215085	0.367212	0.00378	0.294989	0.00439
TG 55:3:0	0.110062	0.00330268	0.112871	0.00233437	0.0741176	0.000812228	0.151802	0.00414	0.0672	0.00763	0.132437	0.00503765	0.123453	0.00011506	0.0834934	0.00425002	0.124569	0.173271	0.00691	0.21486	0.00558
TG 55:4:0	0.0772882	2.63572e-05	0.0898134	0.0010256	4.38382e-05	6.30461e-05	0.0442	0.00457	0.0393	0.00206	0.0408109	0.000841346	0.0381042	4.94247e-05	0.0796211	0.00299583	0.0231504	0.0435	0.00354	0.0939	0.0013
TG 55:5:0	0.0411198	0.00253747	0.0469948	0.000318526	0.212186	0.0237114	0.217688	0.0104	0.00427	0.000177	0.0235272	0.000633631	0.0557139	0.00111642	0.0982289	0.00658508	0.0861115	0.108725	0.00273	0.108785	0.0163
TG 55:6:0	0.0835366	0.00921208	0.0650989	0.00457633	0.466901	0.0735643	0.436083	0.0292	0.211162	0.0748	0.0456623	0.000672	0.0947054	0.00175321	0.0589244	0.000527449	0.108769	0.178631	0.00773	0.225388	0.0461
TG 55:7:0	0.191118	0.0249192	0.167538	0.0131826	0.203641	0.0256787	0.277865	0.0161	1.05544	0.391353	0.0310903	0.00165664	0.090173	0.000268301	0.120801	0.0131563	0.071295	0.0785	0.00196	0.139183	0.0303
TG 56:1:0	0.0260382	0.0173144	0.0351655	0.000890721	0.0984206	0.034522	0.0851	0.00134	0.0234	0.00612	0.0239336	0.0034688	0.114053	0.000338416	0.0374545	0.00346683	0.24915	0.239681	0.00656	0.122095	0.00159
TG 56:2:0	0.0933066	0.00586063	0.0677416	0.00395859	0.190502	0.0654802	0.0961	0.00481	0.0535	0.000903	0.113171	0.00277254	0.25679	0.00238204	0.0887308	0.00131078	0.336924	0.258228	0.00278	0.153198	0.00439
TG 56:3:0	0.561912	0.00723993	0.520034	0.00208358	0.127597	0.0495146	0.0971	0.000163	0.205514	0.00213	0.114692	0.000645379	0.289419	0.000126903	0.237237	0.00350445	0.152516	0.146484	0.0028	0.186609	0.00183
TG 56:4:0	0.58131	0.0126292	0.551156	0.00653555	0.0514003	0.006908	0.072	0.00407	0.11044	0.00293	0.050812	0.00226262	0.162991	0.000977181	0.227683	0.0034933	0.0526531	0.0787	0.00641	0.177478	0.00105
TG 56:5:0	0.566148	0.0119047	0.582154	0.00677189	0.0299787	0.0236263	0.116647	0.000382	0.0994	0.00667	0.056731	4.21424e-05	0.14174	8.55469e-05	0.282302	0.00475845	0.0535709	0.0583	0.00158	0.203165	3.96e-05
TG 56:6:0	0.346374	0.0103985	0.384254	0.00656518	0.0293181	0.00851104	0.0849	0.00174	0.0733	0.0197	0.069352	0.000200369	0.0873615	8.49147e-06	0.307649	0.0011399	0.0512786	0.0341	0.00329	0.20332	0.00497
TG 56:7:0	0.139737	0.0109105	0.161736	0.00490095	0.0179255	0.0118677	0.0274	0.000199	0.0353	0.00545	0.0189436	0.000575174	0.0222332	0.000271384	0.37547	0.00297327	0.0472351	0.00549	0.00776	0.0736	0.00332
TG 56:8:0	0.0312817	0.00144136	0.0365681	0.00170796	0.004571	0.00646437	0.0119	0.00222							0.243421	0.00214604				0.022	0.000867
TG 56:9:0	0.0131498	0.0011224	0.0120853	0.000875114											0.145464	0.00117764
TG 57:3:0	0.0100482	0.00100435	0.0108485	0.00123051	0.024704	0.0287365	0.0173	0.00146			0.00866947	0.000252117	0.0113183	0.00213594	0.016927	0.00187083	0.015555	0.0225	0.00596	0.0205	0.00153
TG 57:4:0	0.0106814	0.00275896	0.0130005	0.00380914	0.0107462	0.0151974	0.013	0.00469			0.00886953	0.00203283	0.00906127	0.00129166	0.0140997	0.00160751		0.0182	0.00649	0.0126	0.00189
TG 57:5:0	0.0130228	0.00259822	0.011042	0.00202786	0.00889539	0.00204306	0.0149	0.00161			0.00649813	0.000232411	0.0129179	0.000723692	0.0133442	0.00169963	0.0163969	0.0128	0.00757	0.0148	0.0022
TG 57:6:0	0.0112166	0.00119225	0.0117074	0.00140716	0.014216	0.00551226	0.011	0.00468	0.0178	0.0252	0.0111619	0.00124907	0.00887897	0.00349702	0.0148376	0.00044192	0.00999813	0.0052	0.00735	0.0281	0.00106
TG 57:7:0	0.0164452	2.11662e-05	0.0125361	0.000188322	0.00869545	0.00351701	0.0126	0.000871	0.014	0.0106			0.0132406	0.000292044	0.0153903	0.000246373				0.0148	0.00413
TG 57:8:0	0.0175392	0.0022082	0.0143649	0.00151559	0.00860534	8.66838e-06	0.00486	0.00688	0.0391	0.00517
TG 58:1:0	0.0159478	0.00134394	0.00902449	0.000334503	0.0272616	0.000733937	0.0225	0.000243	0.012	0.017			0.0299386	0.00198084	0.0212651	0.000136033	0.0541193	0.0486	5.16e-05	0.0284	0.00248
TG 58:2:0	0.0119936	9.01854e-05	0.0130129	0.00163244	0.0305431	0.0058488	0.0254	0.000819	0.0235	0.00686			0.0419833	0.00629653	0.0469132	0.00161276	0.0607377	0.0526	0.00345	0.0311	0.000629
TG 58:3:0	0.0288917	0.00300819	0.0236408	0.000457692	0.0142657	0.000411258	0.0154	0.00151	0.0267	0.00176			0.0349125	0.0012	0.0512023	0.00104432	0.0283698	0.0276	0.0036	0.0224	0.0023
TG 58:4:0	0.0251789	0.00490946	0.0225949	0.00183075	0.0105484	0.0110218							0.0282481	0.000517576	0.0471971	0.00479477	0.00536957	0.00252	0.00357	-6.23e-07	9.19e-08
TG 58:5:0	0.0515328	0.000446492	0.0421789	0.00872983	0.0232031	0.0165658	0.0407	0.00343					0.0383609	0.00117878	0.0369895	0.00187941	0.0246348	0.0182	0.00478	0.0535	0.00502
TG 58:6:0	0.0590015	0.00224874	0.0586971	0.00107772	0.030957	0.0166322	0.0442	0.000941	0.0325	0.0157			0.0312103	0.00337893	0.035206	0.00355454	0.0299985	0.0101	0.0143	0.0784	0.00226
TG 58:7:0	0.0632751	0.00820015	0.0607385	0.00277751	0.0034584	0.00489091	0.0202	0.00107	0.0341	0.0233			0.0165137	0.00309859	0.0398363	0.00147845	0.0276651
TG 58:8:0	0.0303792	0.00144792	0.0346892	0.00658659											0.0319949	0.0080963
TG 58:9:0	0.0205048	0.00349265	0.00920888	0.0130233											0.0427068	0.00110849
TG 36:0:0							0.00807	0.00161	0.0295	0.00175	0.00797816	0.000749238	0.0113752	0.000948669	0.0325873	0.00275285	0.0648148	0.0137	0.00137	0.00979	0.00305
TG 38:0:0							0.0117	0.00124	0.0724	0.00402	0.0184736	0.000896826	0.0138334	4.12523e-05	0.0219855	0.00323678	0.016124	0.0145	0.00407	0.0139	0.00216
TG 38:1:0							0.00495	0.0014	0.0248	0.00237	0.0101353	0.000715246	0.00924299	0.000515161	0.0310747	0.00143184	0.0348591	0.00643	0.0091	0.0113	0.00395
TG 41:0:0							0.0172	0.00158	0.0189	0.00331	0.0261034	0.000357662	0.00921042	0.000330876	0.0171756	0.00286002	0.0129618	0.0146	0.000607	0.018	0.000517
TG 41:1:0							0.00294	0.00416	0.0121	0.00155	0.0108232	0.000344094	0.0101356	0.000270817	0.0127491	0.000208875	0.0097884			0.01	0.00227
TG 43:0:0							0.0825	0.000553	0.0306	0.00397	0.103472	0.000188691	0.038806	0.00109565	0.0412037	0.0064045	0.0234157	0.0269	0.000958	0.0488	0.0019
TG 43:1:0							0.0216	7.63e-05	0.0225	0.00103	0.0558181	0.00352175	0.0224183	0.000526894	0.0360842	0.00173054	0.0236468	0.0182	0.00062	0.0222	0.000983
TG 44:4:0							0.00949	0.00307	0.0235	0.00022	0.00610343	0.000510928	0.0154392	4.35863e-05	0.0168723	0.000646503		0.00766	0.0108	0.00775	0.00177
TG 45:0:0							0.399442	0.00529	0.0438	0.00381	0.370753	0.00801274	0.193016	0.00174185	0.0924312	0.015253	0.175686	0.142862	0.0046	0.129417	0.00288
TG 45:1:0							0.124604	0.00211	0.0791	0.0028	0.257605	0.0055405	0.106106	0.000356838	0.123684	0.00263578	0.0696275	0.0484	0.00222	0.0702	0.00299
TG 45:2:0							0.0236	0.00201	0.0275	0.00366	0.0496203	0.00217854	0.0193932	0.000269794	0.0525336	0.00170327	0.02559	0.0193	0.00202	0.017	5.5e-05
TG 45:3:0							0.00308	0.00123	0.00732	0.0104	0.0087151	0.000115419	0.0071153	0.000821927	0.0231696	6.38504e-05	0.0109605
TG 45:5:0							0.0115	0.000601	0.120494	0.043	0.00684073	0.000935314
TG 47:4:0							0.0894	0.00179	0.00894	0.0126	0.0201635	0.000109481	0.0189652	0.00104985	0.0249974	0.0001066	0.0418156	0.0143	0.00418	0.0124	0.0016
TG 48:6:0							0.0131	0.00158	0.0294	0.0178	0.00704238	6.61531e-05	0.00527596	0.00746133	0.082426	0.000690184
TG 50:0:0							2.09731	0.00441	0.0517	0.0266			0.819786	0.140489	0.0163925	0.00137404	6.0563	1.29898	0.0294	0.961359	0.0167
TG 50:7:0							0.0167	0.00126	0.00629	0.0089			0.00409094	0.00578546	0.0432194	7.10669e-05
TG 51:0:0							0.695042	0.00674	0.000916	0.0013								0.483381	0.0201	0.334181	0.017
TG 53:7:0							0.231508	0.0148	0.962329	0.362751	0.0357851	0.00107786
TG 57:0:0							0.00719	0.0014					0.00302497	0.00011305	0.011048	0.00110601	0.00824798	0.0064	0.00477	0.00274	0.00388
TG 57:1:0							0.0299	0.000123			0.00856701	0.00162049	0.0198334	0.00278112	0.0260765	0.00365177	0.0501563	0.0522	0.000763	0.0263	0.00084
TG 57:2:0							0.0515	0.000506			0.0193192	0.00242016	0.0186202	0.00266224	0.0261193	0.0002356	0.0441028	0.0819	0.00103	0.0397	0.00138
TG 59:1:0							0.0117	0.00104					0.0108111	0.00403289	0.0172349	0.00289599	0.0168383	0.0176	0.00136	0.00989	0.00137
TG 59:2:0							0.024	1.05e-05					0.0114866	0.00318257	0.0162173	0.000422898	0.0222118	0.051	0.000224	0.0275	0.000343
TG 59:3:0							0.019	0.000615					0.0108609	0.00472756	0.0136904	0.000508915	0.0145398	0.0349	0.00317	0.0255	0.00262
TG 59:4:0							0.0131	0.0012					0.00661783	0.00935903	0.0134551	0.00319169		0.0194	0.00237	0.0144	0.000875
TG 59:5:0							0.0113	0.00147
TG 60:0:0							0.00933	0.00208					0.00150303	0.00212561	0.00729277	0.0013408	0.0153578
TG 60:1:0							0.0145	0.00113	0.0136	0.0193			0.011747	0.000213619	0.00764307	0.000487657	0.0193161	0.0285	0.00312	0.00948	0.00684
TG 60:2:0							0.0145	0.00129	0.0143	0.0112			0.0163276	0.00059621	0.0344998	0.00125416	0.0241569	0.0196	0.00391	0.0158	0.00127
TG 60:3:0							0.0111	0.000195	0.0451	0.00904			0.0115386	0.00173185	0.0302837	0.00146603		0.0197	0.00336	0.0129	0.00415
TG 60:4:0							0.0101	0.000768					0.0111036	0.00176388	0.0303947	0.000871431
TG 36:1:0											0.00563397	0.00170677	0.0123914	0.00202241	0.0239927	0.000816572	0.0937306
TG 39:0:0											0.00802491	0.00152707	0.00646694	0.00151817	0.0125375	0.00187045	0.0118625	0.0118	0.0045	0.0139	0.00327
TG 39:1:0											0.00581621	0.000135572	0.00627273	0.000126496	0.00909591	0.000679977	0.0133024	0.0158	0.00112
TG 40:2:0											0.0102659	0.00260624	0.00491671	0.000564588	0.0159714	0.000147339	0.103983
TG 43:2:0											0.0101036	0.000387783	0.0114749	0.00217442	0.013725	0.000970873	0.0151078			0.0134	0.000192
TG 32:0:0													0.00536322	0.00228323	0.0168911	0.00370366	0.0316415
TG 32:1:0													0.00460244	0.00650883	0.00891417	0.000331643	0.0173425
TG 32:2:0													0.00329598	0.00466122	0.00665521	0.000946775	0.0150092
TG 34:0:0													0.0110778	0.00207614	0.0276968	0.00645718	0.0587648
TG 34:2:0													0.00814637	0.00147627	0.00883629	0.000851304	0.0283705
TG 36:2:0													0.0218361	0.00115744	0.0275524	0.00109133	0.0837918
TG 36:3:0													0.0160076	0.00157934	0.0163783	0.000147035	0.0252689
TG 38:2:0													0.00227708	0.00322028	0.0141896	0.00123213	0.0652231
TG 38:3:0													0.00620586	0.00227891	0.0331592	0.00309051	0.0170496
TG 38:4:0															0.00688559	0.00168077
TG 39:2:0															0.00815989	0.00406718	0.0198749
TG 39:3:0															0.00736421	0.000893155	0.0100546
TG 39:4:0															0.00674746	0.000783973
TG 40:3:0													0.00604086	0.00854306	0.0202562	0.0013453	0.0217412
TG 41:2:0															0.00998078	0.000709174	0.0136718
TG 42:3:0													0.00321947	0.00455302	0.0207603	0.00051777	0.0118343
TG 43:3:0															0.0083194	0.000888097
TG 43:4:0													0.00325999	0.00461033	0.00998055	0.00336514
TG 46:6:0															0.0166321	0.00237491
TG 50:8:0															0.00751618	0.000702324
TG 54:9:0													0.00915137	0.000554267	1.85316	0.0212785
TG 58:10:0															0.0171261	0.00129208
TG 60:5:0													0.0076496	0.002866	0.0134578	0.0015176	0.011306
TG 60:6:0													0.0121264	0.00151668	0.0171631	0.000501562	0.016309
				TAG species detected in contemporary dairy
Species	clarified_butter	clarified_butter SDT	goat_butter	goat_butter STD	cow_butter	cow_butter_STD	bovine_milk	bovine_milk STD	ewe_milk	ewe_milk STD	camel_milk	camel_milk STD	mare_milk	mare_milk STD	yak_milk	yak_milk STD	goat_milk	goat_milk STD
TG 22:0:0	0.101802	0.00241137	0.108613	0.0032702	0.024794	0.000138414	0.0258858	0.00209082					0.00940099	0.00100038	0.0484072	4.66615e-05	0.0594618	0.00236049
TG 22:1:0	0.00841606	0.000764379	0.00771334	6.73696e-05	0.0090212	0.000408419	0.064738	0.00733309
TG 23:0:0	0.0104535	0.000507601	0.0112597	0.00016678	0.00683575	0.000319485	0.0182425	0.00191143
TG 23:1:0							0.014004	0.00128607
TG 24:0:0	0.389356	0.00806366	0.401756	0.00633975	0.153788	0.00452023	0.0931194	0.000582986					0.0291289	0.00285868	0.217574	0.00694158	0.236714	0.00501409
TG 24:1:0	0.0163971	0.00138502	0.0166004	0.000541346	0.0124177	9.15176e-05	0.0125801	0.000231679			0.00255401	0.00361192	0.00473092	0.00669053	0.0333563	0.00098578	0.0100527	0.000598953
TG 25:0:0	0.0367566	0.000454844	0.0369737	0.00158101	0.0231909	0.00133531	0.0188502	0.000858505							0.0275551	0.001909	0.0281973	0.00390697
TG 25:1:0	0.00695613	6.77878e-05	0.00517865	0.000927272	0.00612183	0.000224653	0.0143935	0.000379368							0.00623552	0.000766271
TG 26:0:0	1.03674	0.0213187	1.07098	0.0179683	0.556042	0.0149321	0.344081	0.00527064	1.295	0.0580025			0.112817	0.00927635	0.575894	0.0202337	0.682505	0.0146857
TG 26:1:0	0.0846515	3.82043e-05	0.0892067	0.000839991	0.0937515	0.00211853	0.0395421	0.0013632	0.0997952	0.010731			0.0203325	0.00265138	0.114272	0.0034164	0.0505255	0.00236775
TG 27:0:0	0.0986102	0.00199829	0.100751	0.0027418	0.0631179	0.000584144	0.0549565	0.0130509					0.00666141	0.000288171	0.0566327	0.0032061	0.0793158	0.00354947
TG 27:1:0	0.00937573	0.000908557	0.00981839	0.000366509	0.00975505	9.47911e-05	0.0104367	0.00171334							0.00955218	0.000416457	0.00715724	0.000779377
TG 28:0:0	2.06168	0.0221092	2.11099	0.0396543	1.06795	0.0203454	0.740407	0.00681961	2.32134	0.075545	0.00237186	0.00335432	0.311939	0.0182845	0.964513	0.0332597	1.50923	0.0139289
TG 28:1:0	0.27564	0.00194165	0.28727	0.00859107	0.313625	0.00848141	0.109071	0.00221364	0.26366	0.0149373			0.0642992	0.00641142	0.326455	0.0120661	0.182883	0.00547017
TG 28:2:0	0.0352084	0.000298229	0.0366835	0.00024931	0.0293973	0.00174299	0.0107388	0.00149044	0.034177	0.00340301			0.0107601	0.00159043	0.0605864	0.00253394	0.0200025	0.000210647
TG 28:3:0	0.0115931	0.000193861	0.0115234	1.82796e-05	0.00798211	0.000171527	0.0160543	0.0075973	0.0145833	0.00276199			0.00757937	0.000132238	0.0127596	4.63692e-05	0.00815047	0.00107081
TG 29:0:0	0.211719	0.00551076	0.219497	0.00242869	0.109755	0.00143131	0.0980334	0.0172145					0.0115181	0.00142121	0.0831281	0.00221354	0.187237	0.00355873
TG 29:1:0	0.024526	0.000744454	0.0249504	0.00137123	0.0264056	0.000458354	0.0155688	0.00109039					0.00366289	0.00518011	0.0196377	9.37877e-05	0.0217584	0.000355284
TG 30:0:0	3.31333	0.0356135	3.34713	0.0393466	1.53538	0.0199267	1.28854	0.0148081	3.31635	0.120268	0.00908509	0.000194866	0.703744	0.0396532	1.20645	0.0232117	2.6412	0.00846386
TG 30:1:0	0.742724	0.00760369	0.758753	0.0106948	0.601522	0.00932963	0.262621	0.00371164	0.581209	0.0207054	0.00333683	0.00471899	0.202068	0.0134073	0.537657	0.0195909	0.557274	0.00528608
TG 30:2:0	0.11807	0.00266604	0.12059	0.00429302	0.0710839	0.00240422	0.0228492	0.00176557	0.0910278	0.00565995			0.0258217	0.00246494	0.121424	0.00515994	0.0713728	6.94215e-05
TG 30:3:0	0.0373846	0.000907553	0.0380624	0.000838009	0.0176123	0.000798512	0.0189885	0.00654284	0.0340679	0.000156448			0.026639	0.0016832	0.025868	0.000784397	0.0242591	0.0011466
TG 31:0:0	0.303067	0.00270755	0.30587	0.000784571	0.187478	0.00359703	0.216086	0.0609223					0.0187822	0.000134377	0.112207	0.00234111	0.285235	0.00568789
TG 31:1:0	0.0606708	0.000896569	0.0614218	0.000150405	0.0505333	4.52627e-05	0.0285112	0.00467484			0.0145476	0.00251015	0.0121134	0.00202989	0.0322798	0.00162818	0.0582205	0.00128132
TG 32:0:0	3.97754	0.0362433	3.9972	0.0446709	2.58456	0.0248899	2.67582	0.00917356	4.30763	0.140095	0.0244802	0.000394452	1.14211	0.0496084	1.65928	0.0148975	3.43717	0.00888771
TG 32:1:0	1.60875	0.01633	1.63916	0.0223554	1.01269	0.0142087	0.514143	0.0030836	1.15251	0.0508283	0.00865865	0.000497025	0.416348	0.0226725	0.776998	0.0195305	1.34072	0.0022967
TG 32:2:0	0.309906	0.00159104	0.315204	0.00318488	0.187427	0.00474491	0.0706064	0.00266009	0.226921	0.0128202			0.061183	0.00586109	0.212842	0.00403674	0.219161	0.00385467
TG 32:3:0	0.104272	0.000852746	0.106727	0.00135567	0.0425986	0.000765908	0.0292021	0.000228513	0.0908033	0.00774846			0.0970133	0.00474251	0.0502453	0.0019771	0.0829508	0.00356903
TG 33:0:0	0.406816	0.00286393	0.411065	0.000712646	0.434308	0.00369505	0.459376	0.0207676	0.561409	0.0489999	0.0085302	0.000459772	0.0317038	0.00211199	0.285168	0.00207588	0.422168	0.00416167
TG 33:1:0	0.0918861	0.00138305	0.0924843	0.00115243	0.102934	0.00204638	0.0735941	0.00130195	0.117408	0.0164043	0.00474822	0.000246922	0.0174006	0.000579564	0.0561608	0.00104259	0.0965782	0.00362013
TG 33:2:0	0.0138873	0.00267338	0.0135616	0.000551312	0.0129431	0.000752539	0.0411957	0.0377276					0.0114029	0.00097177	0.00972654	8.30672e-05	0.0129233	0.00227428
TG 34:0:0	5.54896	0.00153881	5.45077	0.0180435	5.30429	0.031251	6.71458	0.00271948	6.39355	0.162172	0.100234	0.000311519	1.45977	0.0458558	3.62182	0.00425065	5.11977	0.00882707
TG 34:1:0	1.86553	0.00860757	1.86121	0.00941523	1.92477	0.0280369	1.22585	0.00260308	1.55397	0.0469892	0.0362276	0.000170995	0.707686	0.0262445	1.15722	0.00778429	1.66708	0.00173564
TG 34:2:0	0.347768	0.00399821	0.353915	0.00405121	0.290783	0.00606385	0.115175	0.00335218	0.272285	0.0145619	0.00681165	0.000269874	0.11559	0.00609081	0.24866	0.00491053	0.264035	0.00427794
TG 34:3:0	0.122898	0.000798308	0.125119	0.00167443	0.074868	0.000462489	0.0502016	0.000270977	0.111416	0.00456196			0.294894	0.0127823	0.064185	0.00180839	0.106667	0.00196219
TG 35:0:0	0.706103	0.000899062	0.695104	0.00141332	0.978528	0.00108694	1.21231	0.0237389	0.931625	0.0507997	0.022662	0.000604644	0.0437816	0.0022308	0.892014	0.000316115	0.773193	0.000109113
TG 35:1:0	0.170289	0.000106881	0.172287	0.00043767	0.266555	0.00398944	0.215877	0.00239794	0.237402	0.0144342	0.0097798	0.000456861	0.0313045	0.000639221	0.203595	1.35282e-05	0.190077	7.14486e-05
TG 35:2:0	0.0226082	0.0011758	0.0226215	0.0020779	0.0314572	0.000964373	0.0347914	0.0197376			0.00183401	0.00259369	0.012401	0.0007433	0.0298202	0.00104609	0.02227	0.00124648
TG 35:3:0	0.00515203	0.000133088	0.0052683	0.000162546	0.00287387	0.00127967	0.000504698	0.000714138					0.00822455	0.000268183	0.000688378	0.000973563
TG 36:0:0	6.9053	0.000518524	6.78182	0.0170727	7.52189	0.00436918	12.0316	0.0175468	7.33135	0.0608514	0.266477	0.00321028	1.62572	0.0548514	7.30263	0.0524369	6.71156	0.0235498
TG 36:1:0	3.05827	0.00946647	3.04556	0.0129527	4.41634	0.0272788	2.93949	0.0107933	2.89793	0.105914	0.14838	0.00118729	1.0868	0.0393339	3.30711	0.0230562	2.98563	0.000127436
TG 36:2:0	0.606713	0.00658534	0.604667	0.00311853	0.857549	0.00606966	0.352056	0.00795254	0.578014	0.0300778	0.0264733	0.000741539	0.314772	0.0108537	0.76037	0.0119231	0.506848	0.00421905
TG 36:3:0	0.199285	0.000964709	0.201378	0.00403595	0.214748	0.00260274	0.145702	0.000326792	0.211555	0.0148866	0.008812	0.000289142	0.693335	0.0271279	0.187733	0.00252135	0.20003	0.00314432
TG 37:0:0	0.752403	0.0145629	0.730301	0.00436512	0.872622	0.000566461	1.11118	0.0206479	0.906495	0.0423619	0.0517086	0.00166341	0.0569215	0.00106887	1.03714	0.00338265	0.833663	0.00135245
TG 37:1:0	0.457244	0.00358594	0.456923	0.00297924	0.841969	0.00262656	0.555103	0.00219646	0.580914	0.0180072	0.0290826	0.00111092	0.0566473	0.00133837	0.844541	0.00557488	0.546188	5.4858e-05
TG 37:2:0	0.0963983	0.00043676	0.0960331	0.00104828	0.144701	0.00223392	0.0740085	0.00917285	0.118734	0.0180528	0.00944836	0.000348873	0.0220512	0.00293576	0.192665	0.000952647	0.0982738	0.00253027
TG 37:3:0	0.020687	0.000639493	0.0205178	0.000943179	0.0259251	0.00161933	-2.7286e-07	1.90594e-09					0.0174719	0.00231728	0.0324571	0.000402196	0.015865	0.00023826
TG 38:0:0	5.46513	0.0359347	5.24932	0.0438422	4.7875	0.0432895	6.52675	0.0399123	5.19539	0.00956182	0.422975	0.0057036	1.61038	0.0281297	6.593	0.0179301	5.3758	0.0475874
TG 38:1:0	5.69725	0.0212902	5.719	0.0103473	7.91578	0.024532	5.43285	0.0470382	5.52536	0.138077	0.394827	0.00603834	1.61705	0.041338	8.12163	0.00456137	5.74415	4.20157e-05
TG 38:2:0	1.48336	0.000587508	1.49069	0.000473575	1.91211	0.00976301	0.930466	0.00213749	1.46987	0.050069	0.103784	0.000306418	0.570762	0.0195083	2.36661	0.015093	1.31456	0.00497889
TG 38:3:0	0.411739	0.00654589	0.411521	0.000485101	0.500259	0.00563091	0.419686	0.00366011	0.455285	0.0191575	0.0241017	0.000228584	1.50347	0.046358	0.652237	0.00632094	0.443197	0.00596112
TG 38:4:0	0.0419959	0.000897738	0.0412813	0.00200934	0.0659758	0.00119299	0.037881	0.00400015	0.0622054	1.8669e-05	0.00848824	0.000666768	0.275861	0.00497424	0.0665032	0.000293106	0.0413747	7.38225e-05
TG 39:0:0	0.551862	0.00310497	0.544158	0.00304665	0.425111	0.00492399	0.605136	0.00731926	0.661586	0.0125676	0.0661788	0.00118228	0.0680126	0.000862069	0.569493	0.00207038	0.619242	0.00174556
TG 39:1:0	0.502564	0.000527741	0.504182	0.00351329	0.707115	0.00253288	0.470185	0.00667113	0.600242	0.017511	0.0606862	0.000500935	0.0784469	0.000500654	0.760453	0.0010983	0.601306	0.00351688
TG 39:2:0	0.154133	0.00182005	0.152689	0.000858617	0.235614	0.00142567	0.101048	0.00223668	0.180132	0.0120913	0.0156527	0.00027079	0.0241051	0.00114847	0.261994	0.00118199	0.173369	0.000303456
TG 39:3:0	0.0381461	0.000850692	0.0385766	0.000473239	0.049545	0.00133542	0.00896582	0.00545279			0.00482849	0.00062509	0.0290748	0.00106229	0.0592674	0.00144693	0.0376051	0.0003036
TG 40:0:0	4.06082	0.000410172	3.95496	0.0351795	2.0332	0.0330791	3.60961	0.0173967	3.99373	0.116094	0.48305	0.00108595	1.63921	0.0166763	2.7518	0.0278009	4.05208	0.0616101
TG 40:1:0	4.34853	0.0111134	4.34428	0.0186072	4.45152	0.00784151	3.12076	0.00954603	4.06075	0.0413057	0.610699	0.0115293	2.08144	0.0444456	5.43429	0.00811302	4.5136	0.0388963
TG 40:2:0	2.4174	0.0134556	2.41547	0.008308	3.23234	0.00374938	1.02057	0.00662471	2.1565	0.0494655	0.239311	0.001	0.825177	0.0163222	3.33567	0.0209864	2.40341	0.000928136
TG 40:3:0	0.848278	0.00871878	0.844044	0.00714529	0.941898	0.00601404	0.367336	0.00188013	0.779738	0.0344182	0.0633948	0.00119613	2.162	0.0320689	1.25372	0.0106365	0.810062	0.00697947
TG 40:4:0	0.261486	0.00199374	0.262633	8.55258e-05	0.317673	0.00624317	0.141515	0.000267519	0.283792	0.0122065	0.0459465	0.00293429	0.539647	0.0173628	0.39205	0.00310104	0.259753	0.000303254
TG 40:5:0	0.0561184	0.000169116	0.0559313	0.00159296	0.0635375	0.000716805	0.0351595	0.00389906	0.0776622	0.00198883	0.00563354	0.00113119	0.062777	0.00145996	0.0832081	0.000835732	0.0560957	0.000180667
TG 41:0:0	0.480927	0.000737822	0.477888	0.00680931	0.257211	0.00624606	0.458717	0.00565578	0.557577	0.0129315	0.0867401	0.000214421	0.0734826	0.000615236	0.285817	0.00170635	0.543341	0.00395823
TG 41:1:0	0.358665	0.00386757	0.360528	0.00310085	0.329753	0.00261694	0.298435	0.00534133	0.438084	0.0152307	0.0755441	0.00193753	0.121602	0.0012783	0.35241	0.00369157	0.437464	0.001035
TG 41:2:0	0.112737	0.000687447	0.115929	0.00224284	0.134023	0.000598567	0.0689258	0.00162108	0.142507	0.00470639	0.0265519	0.000390549	0.0363735	3.49456e-05	0.146931	0.00138888	0.132677	0.00114113
TG 41:3:0	0.0315872	0.000389055	0.0314845	8.92037e-06	0.032329	0.00119651	0.0155582	0.00313668	0.0483793	0.00729563	0.00861239	0.000170558	0.0564605	0.000654206	0.0397166	0.000449131	0.030313	0.000259796
TG 42:0:0	3.09655	0.0113028	3.05069	0.0302523	1.44378	0.0179949	3.36127	0.0293591	2.96241	0.152412	0.880772	0.00584079	1.16153	0.00443687	1.41173	0.0268078	3.11194	0.0138374
TG 42:1:0	3.25048	0.00234444	3.3038	0.00679815	2.18407	0.018579	2.21629	0.00956921	3.08187	0.0686362	0.77672	0.0156472	2.83995	0.0290997	2.23038	0.0044948	3.44609	0.0198413
TG 42:2:0	1.5283	0.00811973	1.54315	0.00498861	1.34435	0.00886818	0.585317	0.0067403	1.33438	0.00937729	0.335358	0.00153386	0.894255	0.00264367	1.48666	0.00485599	1.51983	0.00594326
TG 42:3:0	0.549614	0.00433425	0.552748	0.0014677	0.405662	0.00151992	0.202221	0.00392614	0.496452	0.0122265	0.105784	0.00161474	3.41626	0.0430448	0.610378	0.0103688	0.539355	0.00256979
TG 42:4:0	0.165339	0.00276087	0.166237	0.00039855	0.135859	0.00187272	0.073237	0.000273455	0.171234	0.00758025	0.0349004	0.00149	0.913725	0.0089051	0.195244	0.00345078	0.165117	3.68323e-05
TG 42:5:0	0.09167	0.00112347	0.0926653	0.00142006	0.110474	0.000608943	0.0869695	0.00129142	0.111856	0.00247189	0.00909017	0.0015714	0.0880844	0.00207545	0.124827	0.00140013	0.109063	0.00235462
TG 42:6:0	0.02124	0.000470108	0.0208652	0.00124256	0.0222784	0.00237377	0.0162265	0.00372305			0.010086	0.00837019	0.161691	0.00656716	0.023652	0.000426009	0.0324515	0.000831587
TG 43:0:0	0.314028	0.00241068	0.315247	0.00173739	0.207209	0.0033505	0.411539	0.00565405	0.375149	0.0150323	0.239982	0.00359065	0.0546023	0.00110283	0.182783	0.000695516	0.352699	0.00314912
TG 43:1:0	0.366816	0.007357	0.365626	0.00238734	0.252989	0.00481542	0.288678	0.000730025	0.429718	0.000971308	0.13781	0.00222209	0.133596	0.00211427	0.215953	0.000869425	0.463444	0.0008749
TG 43:2:0	0.114873	0.000317829	0.116084	0.000790178	0.0948644	0.00152821	0.0645939	0.00153363	0.142544	0.00777744	0.0408477	0.000711614	0.070176	0.00312014	0.088105	0.00160214	0.135759	0.00100112
TG 43:3:0	0.0295124	0.000834924	0.0309819	0.000465437	0.021401	0.000498779	0.0140988	0.00421822	0.0435416	0.00419383	0.00839839	0.000492975	0.103344	0.000509364	0.0229542	0.000520944	0.0314707	0.000681063
TG 44:0:0	1.32557	0.0142259	1.3038	0.0216768	1.06375	0.00319701	2.59821	0.0191289	1.57417	0.131096	2.16975	0.0196731	0.462999	0.00316169	0.816171	0.0117871	1.32341	0.0127156
TG 44:1:0	3.23804	0.0300103	3.2583	0.0194425	1.90134	0.0209039	2.30385	0.0162916	2.93822	0.116137	1.80751	0.0242651	2.37926	0.00264872	1.50381	0.00831429	3.37376	0.0158558
TG 44:2:0	1.41039	0.0105208	1.42164	0.00754582	0.933415	0.0114616	0.633837	0.00293391	1.23744	0.011377	0.545431	0.00187313	1.27879	0.00537696	0.812268	0.002545	1.40805	0.0055486
TG 44:3:0	0.452345	0.0011309	0.460927	0.0052013	0.261402	0.0022224	0.196928	0.000991045	0.424864	0.00672382	0.14351	0.00133276	3.75944	0.0262409	0.295192	0.00183734	0.471063	0.00213662
TG 44:4:0	0.120782	9.88031e-05	0.121502	0.000211791	0.0720312	0.00104862	0.0570879	0.00111947	0.129633	0.00447494	0.0457895	0.00160255	2.18957	0.0171147	0.0776228	0.00106834	0.12731	0.00134093
TG 44:5:0	0.0659648	0.00187212	0.065246	8.09628e-05	0.0543131	0.000277734	0.0467866	5.19282e-05	0.0745551	0.00383505	0.0136842	0.00290841	0.39478	0.00194625	0.0702235	0.00161993	0.0797901	0.00174951
TG 44:6:0	0.0246224	0.00169366	0.0239263	0.000291353	0.0235991	0.000288172	0.0168303	0.00252778	0.0325912	0.00108546	0.00694235	0.000624414	0.86474	0.0143974	0.0339037	0.000648521	0.0380952	0.000227025
TG 45:0:0	0.164687	0.000363969	0.167615	0.00205381	0.203312	0.00011555	0.441364	0.00585299	0.268463	0.0168985	0.596574	0.00476898	0.0308517	0.00104026	0.172574	0.000218725	0.189744	0.00655641
TG 45:1:0	0.261175	0.00421364	0.263847	0.00156058	0.250911	0.00332297	0.313034	0.0102029	0.326421	0.00592919	0.457482	0.00462379	0.103702	0.00204269	0.165962	0.00106083	0.327339	0.00119284
TG 45:2:0	0.108825	0.000953841	0.109578	0.00144253	0.0924302	0.00196771	0.0761212	0.00123266	0.136415	0.00053433	0.120165	0.000134406	0.0662749	0.00153375	0.0681613	0.000227178	0.139041	0.00168407
TG 45:3:0	0.0308132	0.00034733	0.0312479	0.000821514	0.0238825	0.000241467	0.0161209	0.0016642	0.0427372	0.00266993	0.0197974	0.000249141	0.104486	0.00149987	0.01839	0.000303363	0.0368701	0.000155372
TG 45:4:0	0.0116756	0.00193331	0.0118666	0.00035984	0.00953496	0.000912936	0.0592128	0.0122794	0.0223776	0.00208273	0.0920592	0.00390007	0.0817467	3.65411e-05	0.0223653	0.00143903	0.0352264	0.00103041
TG 46:0:0	0.679258	0.00118341	0.692718	0.00820575	0.839954	0.00963183	2.43189	0.0175116	0.97363	0.0555746	3.44954	0.0640437	0.119226	0.00398592	0.699759	0.0124329	0.704285	0.0109053
TG 46:1:0	1.673	0.00277121	1.68856	0.0099819	1.84548	0.010861	2.5348	0.0277655	1.85341	0.117305	4.71319	0.0179734	1.56179	0.00373174	1.11758	0.01647	1.77081	0.00907088
TG 46:2:0	1.43632	0.0084962	1.46108	0.000977499	1.02706	0.00492383	0.704351	0.000933739	1.21419	0.0510055	1.64005	0.011479	0.909743	0.00342218	0.698923	0.00150983	1.5219	0.0100091
TG 46:3:0	0.570862	0.00748833	0.584389	0.00476997	0.345462	0.00136747	0.231519	0.00601778	0.492029	0.0119366	0.406839	0.00361373	2.5446	0.0205382	0.296146	0.000429349	0.561887	0.00237105
TG 46:4:0	0.208839	0.00134255	0.213166	0.000116731	0.105925	0.00208433	0.0790811	0.000226766	0.202259	0.0064106	0.102768	0.00233138	1.9951	0.0109324	0.096644	0.000779555	0.217593	0.000471809
TG 46:5:0	0.0698434	0.00149077	0.0718433	0.00291149	0.0403901	0.00198726	0.0346961	0.00048602	0.0819141	0.00102445	0.0300231	0.00102158	0.670115	0.00268545	0.041445	0.000647932	0.0822467	0.00193718
TG 46:6:0	0.0192377	0.000357092	0.0160075	0.0046399	0.0129719	0.000568336	0.0225783	0.00986252	0.025702	0.00154326	0.00981595	0.000434981	1.34675	0.00984822	0.0171996	0.000618126	0.0303462	0.000215095
TG 47:0:0	0.15471	0.00261341	0.153741	0.00108874	0.254627	0.00393473	0.551555	0.0085511	0.268898	0.0368675	1.0119	0.0150223	0.035464	0.000715294	0.256141	0.00442359	0.18681	0.00678096
TG 47:1:0	0.185889	0.00073522	0.190729	0.00384163	0.33322	0.000363756	0.430963	0.00230882	0.30022	0.00526375	1.17197	0.00215291	0.0874637	0.0010122	0.255432	0.00516287	0.243578	0.00446297
TG 47:2:0	0.0744844	0.000560381	0.0756705	0.00110289	0.135299	0.000846176	0.113824	0.00701949	0.11847	0.00715925	0.422093	0.00865427	0.0588896	0.000150676	0.0945531	0.00215574	0.0944884	0.00179694
TG 47:3:0	0.0217838	2.65167e-05	0.0218004	8.08871e-05	0.0321211	0.000215723	0.025111	0.00359003	0.0382771	0.000266113	0.107551	0.000349303	0.0843718	0.00217943	0.0267024	0.00206673	0.0284913	0.000329254
TG 47:4:0	0.00816822	0.000382999	0.0101297	0.000885233	0.00694022	0.00373423	0.0556132	0.0117751			0.145817	0.00232255	0.0687117	0.00124431	0.010862	0.00729104
TG 48:0:0	0.324306	0.00210704	0.344348	0.00281026	0.49232	0.00236921	1.61616	0.000825876	0.44749	0.0203147	3.0841	0.112235	0.00413061	0.0058416	0.601739	0.0170727	0.373435	0.0232305
TG 48:1:0	1.55908	0.0203987	1.54397	0.0155554	2.34065	0.0136277	3.29752	0.0353295	1.86147	0.137381	7.9758	0.0145166	1.12567	0.00775894	1.68947	0.00700687	1.70045	0.0071665
TG 48:2:0	0.79047	0.00161003	0.801152	0.00805954	1.32856	0.00585542	1.06489	0.00653057	0.900549	0.0493051	4.14008	0.0429244	0.961686	0.0183315	0.875831	0.00362941	0.822388	0.000148286
TG 48:3:0	0.249136	0.00205493	0.252089	0.00196345	0.394828	0.000917169	0.321229	0.00657771	0.307171	0.00776392	1.30383	0.010654	1.71485	0.0233324	0.279119	0.000533942	0.260157	0.0025213
TG 48:4:0	0.079898	0.00127496	0.0823538	0.00113568	0.107484	0.00500126	0.0969974	0.000135583	0.112237	0.00269658	0.34571	0.00443009	1.92096	0.023972	0.0697133	0.000791703	0.0866775	0.000558516
TG 48:5:0	0.0557127	0.00106201	0.0581511	0.000977248	0.0400463	0.000178662	0.0367705	0.00121365	0.0693332	0.00680192	0.0849552	0.000544628	0.446683	0.00545488	0.0275237	0.00302402	0.0723782	0.000360177
TG 48:6:0	0.0185047	8.60215e-05	0.0195506	0.00098729	0.0119032	8.26672e-05	0.0166877	0.00270231	0.0295132	0.000533612	0.0239643	0.00281487	1.2494	0.0134831	0.0120593	6.87689e-06	0.0332188	0.000264641
TG 49:0:0	0.0661456	3.38056e-05	0.0711617	0.00318874	0.0948106	0.00198699	0.228595	0.00261068	0.106793	0.0264373	0.575527	0.013544	0.00223689	0.00316347	0.149318	0.00229455	0.0837867	0.0041493
TG 49:1:0	0.282971	0.000538339	0.281063	0.000494846	0.516612	0.00569355	0.646196	0.0114575	0.371214	0.013477	1.66414	0.000273494	0.108851	5.90936e-05	0.51553	0.00163008	0.368971	0.00198161
TG 49:2:0	0.115784	7.8344e-06	0.117571	0.00201682	0.231076	0.00278516	0.19725	0.000709862	0.16911	0.000107639	0.943258	0.00625898	0.0909222	7.46761e-05	0.242969	0.000724492	0.14723	0.00160718
TG 49:3:0	0.0296094	0.000638329	0.030542	0.00110273	0.0605475	0.00176624	0.054054	0.00166882	0.0513137	0.00306579	0.333513	0.00360844	0.128094	0.00147391	0.0698027	0.000673835	0.0387942	0.000235683
TG 49:4:0	0.00639338	0.000104852	0.00858731	0.00158221	0.015177	0.0016696	0.0409928	0.00428014	0.0191796	0.00549479	0.165238	0.00485965	0.0985107	0.000672666	0.0225108	0.0020085	0.0159166	0.000669046
TG 50:0:0	0.112581	0.0128344	0.139502	0.00443546	0.153116	0.00238006	0.371096	0.0133113	0.148168	0.016014	1.49369	0.0676663	0.00760781	0.00187398	0.350757	0.0240887	0.179667	0.0153948
TG 50:1:0	1.66606	0.0108226	1.64371	0.0204248	2.56612	0.0117515	3.82172	0.0360714	1.49158	0.12098	7.69105	0.057481	1.03219	0.0201897	2.5779	0.0244614	1.83423	0.00111899
TG 50:2:0	1.18615	0.012275	1.19419	0.00556124	2.09666	0.00381371	1.56695	0.0012808	1.16983	0.0911572	6.74304	0.0469045	1.44321	0.0358664	1.94157	0.0145793	1.34072	0.00191044
TG 50:3:0	0.396563	0.00274656	0.404833	0.00247076	0.754358	0.00801089	0.500536	0.00176206	0.448988	0.0330253	2.81658	0.0272554	2.34235	0.0371426	0.740856	0.00246694	0.429398	0.00113387
TG 50:4:0	0.12752	0.00013968	0.129338	0.000306406	0.224788	0.00264144	0.170884	0.000252416	0.169695	0.00506211	1.01521	0.00895081	2.9176	0.0533585	0.204897	0.00177859	0.14806	0.000167159
TG 50:5:0	0.0409091	0.000772105	0.0422687	0.000243497	0.0689098	0.00111794	0.0716967	0.000702867	0.0536278	0.0138236	0.273807	0.00131487	0.700176	0.00674797	0.0575002	0.000234909	0.0540795	0.00133458
TG 50:6:0	0.0144457	0.000284005	0.0152103	2.92963e-05	0.0159086	8.44563e-05	0.0233139	0.0040729	0.0219285	0.00105119	0.0747937	0.000622566	1.38484	0.0125495	0.0148435	0.00112747	0.021946	0.00161505
TG 50:7:0	0.00917084	0.00145676	0.00634802	0.00110579	0.00648065	2.00265e-05					0.0119152	0.00444972	0.137916	0.0028103	0.00796383	0.00163528	0.00766148	0.000223931
TG 51:0:0	0.0229369	0.00262186	0.0300096	0.000835824	0.0337857	0.00086935	0.067168	0.00652013	0.0360508	0.00302183	0.22343	0.00922289	-2.13391e-08	2.73113e-09	0.0721776	0.000343821	0.0345466	0.00479819
TG 51:1:0	0.219091	0.000863461	0.219806	0.00435512	0.359004	0.00306814	0.367589	0.000792483	0.228705	0.00677666	1.17051	0.000526187	0.0541935	0.00105841	0.428902	0.00245815	0.282348	0.00139684
TG 51:2:0	0.223367	0.00283124	0.228523	0.000853839	0.420416	0.000389508	0.26428	0.00900761	0.251195	0.0120819	1.16668	0.00340539	0.137738	0.00249117	0.464163	0.00206143	0.304769	0.0024885
TG 51:3:0	0.0810636	0.000163789	0.0851737	0.000798569	0.141071	0.002217	0.0781116	0.00299109	0.102297	0.00353303	0.556261	0.00230051	0.148577	0.00284843	0.204616	0.00127965	0.104055	0.00049704
TG 51:4:0	0.0240057	0.000848246	0.0239209	0.000588811	0.040799	0.000909945	0.0293693	0.00550205	0.0375505	0.00250864	0.24488	0.000205767	0.253126	0.00283057	0.062633	0.000159903	0.0325369	0.000434356
TG 51:5:0	0.0126478	0.000610075	0.0146587	0.000531205	0.0210582	0.00151875	0.0940888	0.018669	0.0164455	0.000202841	0.329116	0.00645642	0.0941373	0.00161846	0.0763201	0.000258719	0.0534834	0.000147111
TG 51:6:0	0.0089331	1.53758e-05	0.00866441	0.00121084	0.01406	0.000125221	0.0401942	0.00472516	0.016345	0.00231346	0.275868	0.00240484	0.105435	0.00223574	0.0533733	0.00121582	0.0344484	0.000173314
TG 52:0:0	0.228381	0.000957518	0.242591	0.0161498	0.315692	0.0034674	0.334815	0.00026776	0.2335	0.00109308	1.32951	0.0334853	0.0314577	0.00242002	0.522641	0.0135704	0.300411	0.00567094
TG 52:1:0	0.793946	0.00311416	0.779088	0.00438563	1.12609	0.00181235	0.914551	0.00564714	0.611375	0.0591794	4.11868	0.0405972	-2.13391e-08	2.73113e-09	1.71181	0.0295132	0.917489	0.00376511
TG 52:2:0	1.75368	0.0161554	1.79121	0.00072264	2.77509	0.00544196	1.70742	0.0166044	1.49283	0.16311	6.13482	0.0194819	1.66349	0.0120478	2.99138	0.0149333	2.04157	0.0119389
TG 52:3:0	0.763791	0.00238206	0.784632	0.00528695	1.13117	0.00399904	0.542274	0.00282976	0.718383	0.0756356	3.57184	0.0358762	1.12438	0.040343	1.58412	0.00347433	0.811911	0.00408873
TG 52:4:0	0.251827	0.00226875	0.255976	0.00164635	0.381765	0.00113172	0.297773	9.6903e-05	0.288233	0.0177972	1.65333	0.020316	5.42158	0.12119	0.545852	0.0012898	0.291912	0.000578846
TG 52:5:0	0.0681213	0.000487939	0.0686291	0.00158024	0.111704	0.000506268	0.120576	0.00160063	0.0830136	0.0254845	0.638436	0.0116235	2.52372	0.0760076	0.143075	0.00115953	0.0837122	0.000964387
TG 52:6:0	0.0153051	0.000826664	0.0162806	0.000883494	0.0304645	0.000692935	0.0331424	0.00111116	0.0261192	0.00211319	0.196675	0.00317903	4.48281	0.0995382	0.030558	0.00437623	0.0263329	0.000120552
TG 52:7:0	0.00714521	0.000393629	0.00538605	0.00761703	0.00724918	0.00143141					0.0440322	0.000265996	1.12213	0.0173728	0.0113959	0.00188463	0.0091388	0.000311375
TG 53:0:0	0.010745	0.000785183	0.000230022	0.000325346	0.0115165	0.00113203	0.0105604	0.0106138	0.00421383	0.00595999	0.059356	0.0189881			0.0363789	0.00222285
TG 53:1:0	0.0701367	0.000844098	0.0719359	0.000754956	0.110681	0.0028545	0.0972927	0.00231742	0.0769508	0.00189571	0.386337	0.00274547	0.00421383	0.00463523	0.153102	0.00316491	0.0966927	0.0029004
TG 53:2:0	0.137849	0.000799726	0.136525	0.000317263	0.226865	0.00278338	0.111714	0.00225298	0.133185	0.0126587	0.553665	0.00389221	0.0402637	2.72829e-05	0.22547	0.00217211	0.188993	0.00170853
TG 53:3:0	0.0734302	0.000146588	0.0752456	0.000581848	0.126784	0.000799086	0.0530409	0.00169005	0.079192	0.00704299	0.363303	0.00653734	0.0582398	0.000434389	0.139615	0.00134652	0.10292	0.00051109
TG 53:4:0	0.0278356	0.000977981	0.0276544	0.000190957	0.0457969	0.00120241	0.0228892	0.00398883	0.0352853	0.00082828	0.20034	0.000449051	0.12449	0.00320885	0.0583148	0.000808199	0.0396013	0.00116767
TG 53:5:0	0.0113568	0.000168232	0.0124686	0.00378434	0.0190564	0.001438	0.0316646	0.00837647	0.0158295	0.00357418	0.214481	0.00513706	0.144188	0.00337036	0.0562409	0.0010935	0.0304287	0.00219501
TG 53:6:0	0.0116629	0.000150933	0.0117961	0.00229399	0.0185637	5.60836e-05	0.042191	0.00587985	0.020503	0.00488765	0.264277	0.000550396	0.128873	0.00383609	0.0809343	0.00156711	0.0553462	0.000222316
TG 53:7:0	0.00626099	0.0010725	0.00839932	0.000839271	0.0104825	0.000119729	0.0210146	0.00832643			0.150073	0.00209078	0.108871	0.00112252	0.0398847	0.00109062	0.0197117	0.000522191
TG 54:0:0	0.0172794	0.000857803	0.022488	0.003306	0.0146802	0.00109956	0.0576063	0.00248746	0.0259004	0.00107575	0.0949392	0.00362351	0.0081819	0.00130099	0.0550305	0.0058688	0.0441966	0.00726282
TG 54:1:0	0.197401	0.00561934	0.1969	0.00492805	0.231537	0.00102897	0.14626	0.00111663	0.174201	0.0046548	0.862509	0.0144351	0.0134766	0.00532165	0.385456	0.000475205	0.239509	0.00322016
TG 54:2:0	0.553382	0.00172862	0.553741	0.00213236	0.735384	0.00310151	0.229045	0.00357628	0.414064	0.0461839	2.01588	0.0131245	0.0477764	0.00386385	0.902055	0.0038243	0.68472	0.002416
TG 54:3:0	0.776445	0.00309582	0.799673	0.00384098	1.12324	0.0032222	0.255036	0.00423088	0.577669	0.0788268	2.23119	0.0072623	0.294775	0.00835429	1.08265	0.00277216	0.958678	0.00708231
TG 54:4:0	0.412679	0.000792659	0.424121	0.000170079	0.51433	0.000674306	0.131955	0.00174744	0.34268	0.0168175	1.3455	0.0204307	0.451745	0.00616783	0.654543	0.00205033	0.462905	0.00307093
TG 54:5:0	0.187196	0.000895474	0.191724	0.000372407	0.236538	0.000264337	0.121563	9.85047e-05	0.170324	0.0356175	0.806535	0.0120117	1.49789	0.0325645	0.29824	0.00313902	0.216487	0.00246636
TG 54:6:0	0.0601758	0.00194328	0.0625679	0.00207371	0.0791234	0.000802783	0.0523641	0.00545313	0.0680038	0.0180921	0.34534	0.00492554	1.1039	0.0273109	0.103213	0.00253415	0.0733819	0.00229318
TG 54:7:0	0.0159947	0.000188115	0.0144917	0.000678963	0.0170555	0.000219571	0.023326	0.00725787	0.0216769	0.000391353	0.105891	0.00155195	2.6791	0.0751185	0.0221345	0.000497946	0.0169609	0.00100048
TG 55:0:0	0.00686125	0.000567286	0.00830723	0.00166057	0.000130588	0.000184745	0.0141669	0.00438718	0.0174397	0.0186887	0.0211887	0.00112269			0.0186688	0.00125549	0.00805886	0.000494447
TG 55:1:0	0.0170409	0.000567004	0.018014	0.000470317	0.0317403	0.000294824	0.0475658	0.0154295	0.0305698	0.00538354	0.08025	0.00208112			0.0530883	0.000639619	0.0274689	0.00101816
TG 55:2:0	0.0157506	0.000557848	0.0167243	0.000405043	0.0397417	0.000738809	0.0256611	0.000614665	0.0275169	0.00116379	0.0892788	0.00168912	0.0086839	0.000320925	0.0508444	0.00100973	0.0265988	0.00108871
TG 55:3:0	0.0119313	0.000911313	0.012253	0.000334036	0.0291612	0.000798782	0.0177486	0.00497881	0.0220356	0.00623049	0.0736185	0.000305596	0.0105727	0.000598526	0.0312494	0.000407815	0.0180105	0.000159388
TG 55:4:0	0.0084239	0.00138397	0.00963998	0.000537316	0.0128753	0.00063644	0.0113537	0.00482572	0.0150904	0.0049688	0.0545649	6.48852e-05	0.0125511	0.00258072	0.0145321	0.000451217	0.00973212	0.000403042
TG 56:0:0	0.00703689	0.000696108	0.00857006	6.42458e-06	0.00834849	0.00171086	0.0281332	0.00190823	0.0331234	0.0344928	0.0290545	0.000930411			0.0265253	0.00584702	0.0141494	0.00126707
TG 56:1:0	0.0258085	9.59158e-05	0.0256243	0.000559479	0.0339331	0.000926582	0.0379854	0.000109969	0.0410232	0.00510619	0.137406	0.00435679			0.0874829	0.000586181	0.0397669	0.00397496
TG 56:2:0	0.0249832	0.000482621	0.0257307	0.00015496	0.0535137	0.000968128	0.0355275	0.000965233	0.0324792	0.000265614	0.161861	0.000299868	0.0102105	0.00809747	0.0866573	0.000919652	0.0368448	0.000344149
TG 56:3:0	0.016921	0.00161298	0.0163765	0.000279403	0.0335624	0.000782304	0.0162401	0.00249673	0.0176996	0.00123701	0.131478	0.000768711	0.021118	0.00735076	0.0516448	0.000300215	0.0175546	0.000689685
TG 56:4:0	0.00636746	0.00225405	0.0106894	0.00183455	0.0192594	2.15407e-05	0.0181129	0.00434839	0.0176284	0.00357338	0.125365	0.00132842	0.0300509	0.00129357	0.0260437	0.00067784	0.012516	0.00107005
TG 56:5:0	0.0149764	0.00136592	0.0123939	0.00439254	0.0243195	0.000189636	0.0197823	0.00434914	0.00997399	0.00116279	0.154082	0.000228626	0.0584382	0.000329658	0.0227449	0.00111177	0.0173173	1.03644e-05
TG 56:6:0	0.0347835	0.000169384	0.0349953	0.000638195	0.0520759	0.00155696	0.0382191	0.000505781	0.0406613	0.00838177	0.202196	0.00168826	0.10802	0.00112443	0.0474354	0.000563431	0.05247	0.000519851
TG 56:7:0	0.0139296	0.000902605	0.0158611	0.0011641	0.0216199	0.00112056	0.0248573	0.00331879	0.0256896	0.00074169	0.092902	0.00113792	0.138887	0.00337001	0.0203491	0.000562095	0.0270075	0.00119312
TG 56:8:0	0.0104961	0.0017894	0.00964369	0.000415761	0.00840092	4.25738e-05			0.013702	0.00261572	0.0329964	0.000688627	0.0746316	0.00245948	0.00942242	0.00069507	0.0091506	0.000230247
TG 58:0:0	0.00522532	0.00064201	0.00217339	0.00307364	0.00554425	0.000404837	0.015119	0.00690916	0.0139207	0.00821491	0.0103876	0.000260656			0.0100703	0.00075151
TG 58:1:0	0.0094043	0.000157608	0.0101434	0.000102432	0.0137349	0.000868106	0.0263712	0.0087008	0.0272875	0.0195961	0.0522152	0.00108062			0.0366961	0.000617775	0.0184316	0.00142504
TG 58:2:0	0.0111308	0.00141985	0.0101012	0.000523418	0.0139247	0.000642469	0.0185075	0.000441455	0.015096	0.00160917	0.0499176	0.000365993	0.0152526	0.00990749	0.0368203	0.000814299	0.0142986	0.000799367
TG 58:3:0	0.00467881	0.00661684	0.00849844	0.00100969	0.0102212	0.000805138	0.00623858	0.00882269	0.0138658	0.00540346	0.0312812	0.00258332	0.0114516	0.00720373	0.0181613	0.00121971	0.0092975	0.00120728
TG 58:5:0			0.00314152	0.00444278	0.00687404	0.000207158					0.0387126	0.000159353	0.0138784	0.00444944	0.0100014	0.00235513
TG 58:6:0	0.00791609	0.00126015	0.00911903	0.00104759	0.0118181	0.00130779	0.00997569	0.0141078			0.0537858	0.00010257	0.0152338	0.000450761	0.0134054	0.000290768
TG 58:7:0	0.00862884	0.00124657	0.0090536	5.16704e-05	0.008076	0.00050388					0.0368451	0.000289575	0.0131073	0.00169178	0.00964385	0.00253644
TG 46:7:0									0.0102621	0.00232497	0.00281908	0.00398678	0.277388	0.00312109	0.0067579	0.000472794
TG 57:0:0									0.0254839	0.0310013	0.00490475	0.0069364			0.00773747	0.00147179
TG 57:1:0									0.0188017	0.00825161	0.031423	0.00114477			0.0293397	0.000481365	0.0155376	0.000420631
TG 57:2:0									0.0195015	0.00480068	0.027005	1.1235e-05			0.0273077	0.000231257	0.0183501	0.000888251
TG 57:3:0									0.0122646	0.00299694	0.0141082	0.000315879	0.00436808	0.00617739	0.0128814	0.000143515	0.00672875	0.000213756
TG 20:0:0													0.0070331	0.000579522	0.00674951	0.000415866	0.0130489	0.00118634
TG 26:2:0													0.00675532	0.00128764	0.0170198	0.000808406	0.0061551	0.000225684
TG 32:4:0													0.014359	0.00187616	0.00787277	0.00201522
TG 34:5:0															0.00519046	0.0005855
TG 38:5:0													0.0298492	0.001487	0.017955	0.00127072	0.0105892	0.00141765
TG 40:6:0											0.00404294	0.00571758	0.121162	0.00513278	0.0119178	0.000449089	0.00843902	0.000497689
TG 42:7:0											0.00451199	0.00638092	0.0116192	0.00050929	0.00487381	0.000581456
TG 44:7:0													0.021522	0.00113025	0.0103134	0.000255629	0.0105016	0.00018465
TG 48:7:0											0.0070467	0.00304558	0.0873576	0.000453781			0.00716648	0.000784697
TG 52:8:0											0.0148771	0.000679083	0.0471781	0.00103631
TG 54:8:0											0.0233204	0.00101695	0.831901	0.0189782	0.00853431	0.00504016
TG 54:9:0											0.0122646	0.00207825	1.82955	0.0378419
TG 55:5:0											0.0648029	0.000279513	0.0222951	0.0015736	0.0162242	0.000212078	0.0109323	0.00046393
TG 55:6:0											0.0984835	0.00131516	0.0140112	0.00587137	0.0253881	0.00115903	0.0184722	0.00141418
TG 55:7:0											0.0983244	0.000453549	0.0220844	0.00238519	0.027096	0.000353456	0.0244725	0.00175184
TG 56:9:0											0.0122636	0.000337322	0.0919157	0.0036083
TG 57:4:0											0.0112984	0.000925379			0.00689889	0.00217869
TG 57:5:0											0.0166503	0.00267634			0.00924442	0.000496291
TG 57:6:0											0.0148468	0.00220632			0.00569839	0.000735525
TG 58:4:0											0.00985477	0.00632985	0.0129824	0.000512417	0.00530643	0.00023929
TG 59:0:0											0.00653708	0.00114565			0.00709728	0.00248696
TG 59:1:0											0.0121289	0.00014979			0.00954757	0.00234147	0.0060523	0.00105379
TG 59:2:0											0.0123277	0.00193465			0.0120877	6.36225e-05	0.00874467	0.000167739
TG 59:3:0											0.00961944	0.00214166			0.00787546	0.000513057	0.00592873	0.000129888
TG 59:4:0											0.00573088	3.28062e-05			0.0105002	0.000121759
TG 59:5:0											0.00566213	0.000672335
TG 60:0:0											0.00362227	0.00246914			0.00612198	0.00012505	0.00490425	0.000605106
TG 60:1:0											0.0146235	0.00125163			0.0111328	0.000904027	0.00947047	0.0022344
TG 60:2:0											0.0192242	7.94916e-05			0.0130712	2.97625e-05	0.00724788	0.00015401
TG 60:3:0											0.0111294	3.71547e-05			0.00959612	0.001757	0.00786468	0.000357419
