# Supplementary material for: Open sesame: Identification of sesame oil and oil soot ink in organic deposits of Tang Dynasty lamps from Astana necropolis in China
Source: PLOS journal article supplement (doi:10.1371/journal.pone.0158636), 2017-02-24
Supplement: S4 (10.1371/journal.pone.0158636.s004) [file journal.pone.0158636.s004]

Supplementary Figure 2S . Light microscopy of deposits from Astana lamps

1#a

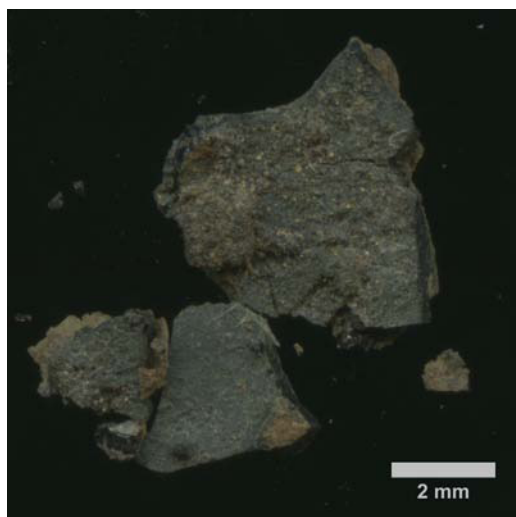

4#

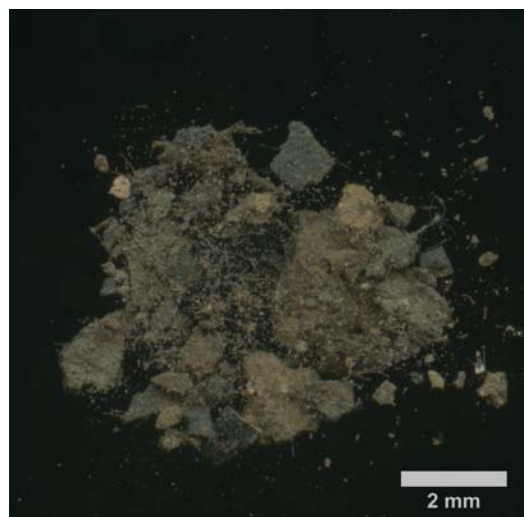

1#b

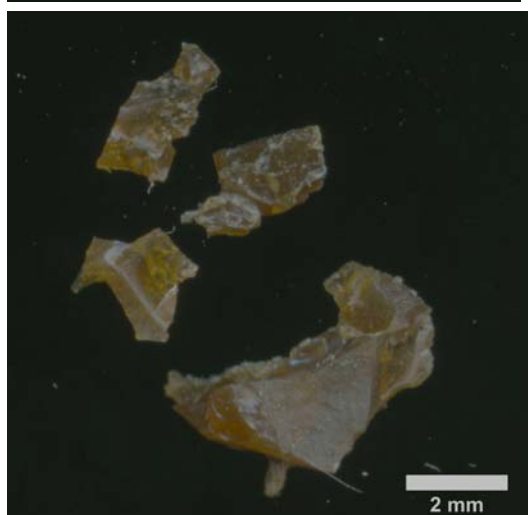

5#

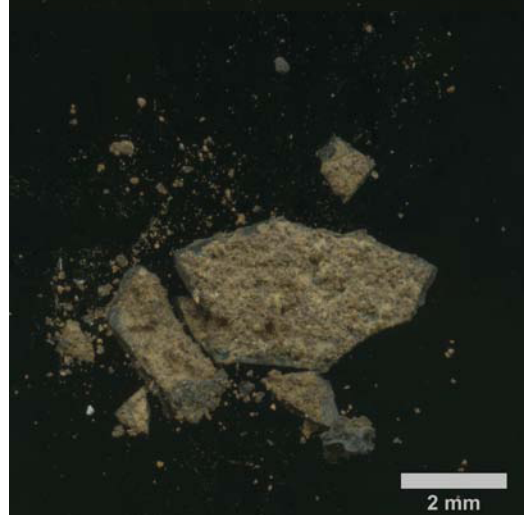

2#

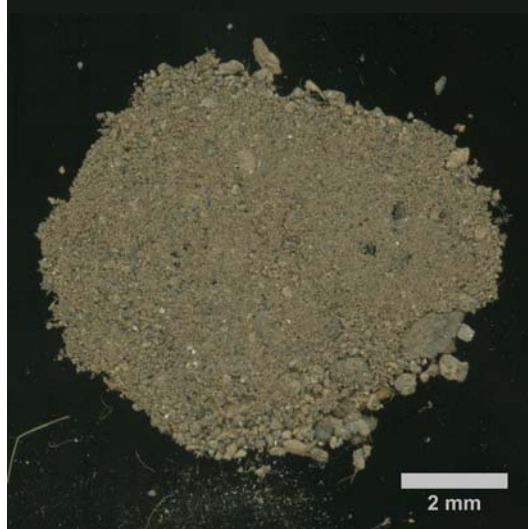

6#

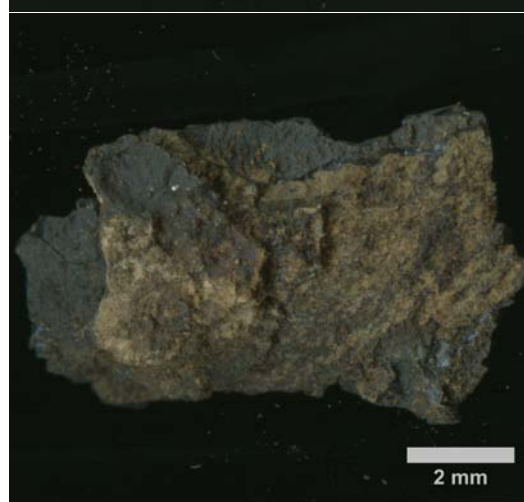

3#

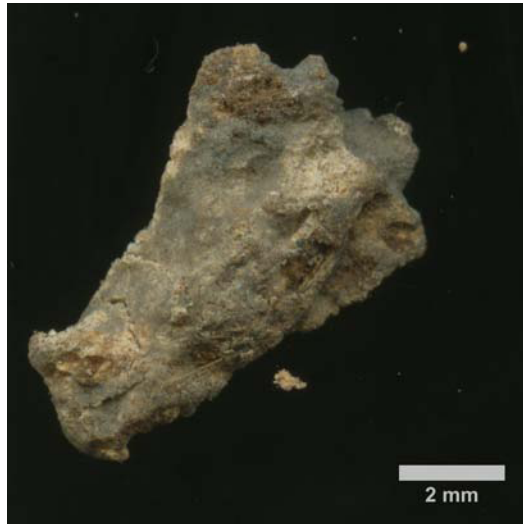

7#

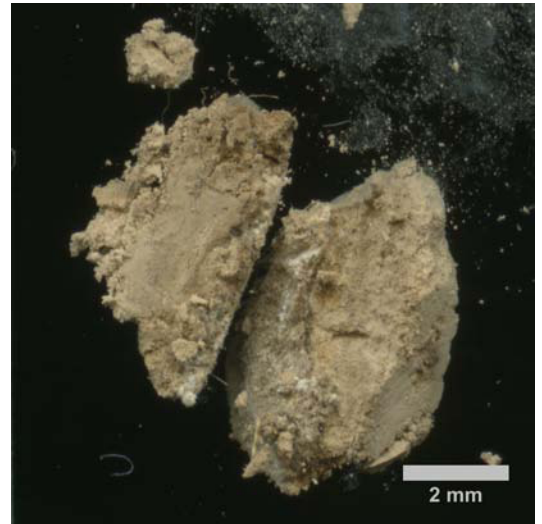

Figure 2S: Light microscopy of deposits from Astana lamps. Ancient materials had yellowish to black color and different density and texture - from soft easily crumbled by pressing with fingers (as 2# and 3#) to hard with sharp edges (as #1b).
