# Supplementary material for: Open sesame: Identification of sesame oil and oil soot ink in organic deposits of Tang Dynasty lamps from Astana necropolis in China
Source: PLOS journal article supplement (doi:10.1371/journal.pone.0158636), 2017-02-24
Supplement: S5 (10.1371/journal.pone.0158636.s005) [file journal.pone.0158636.s005]

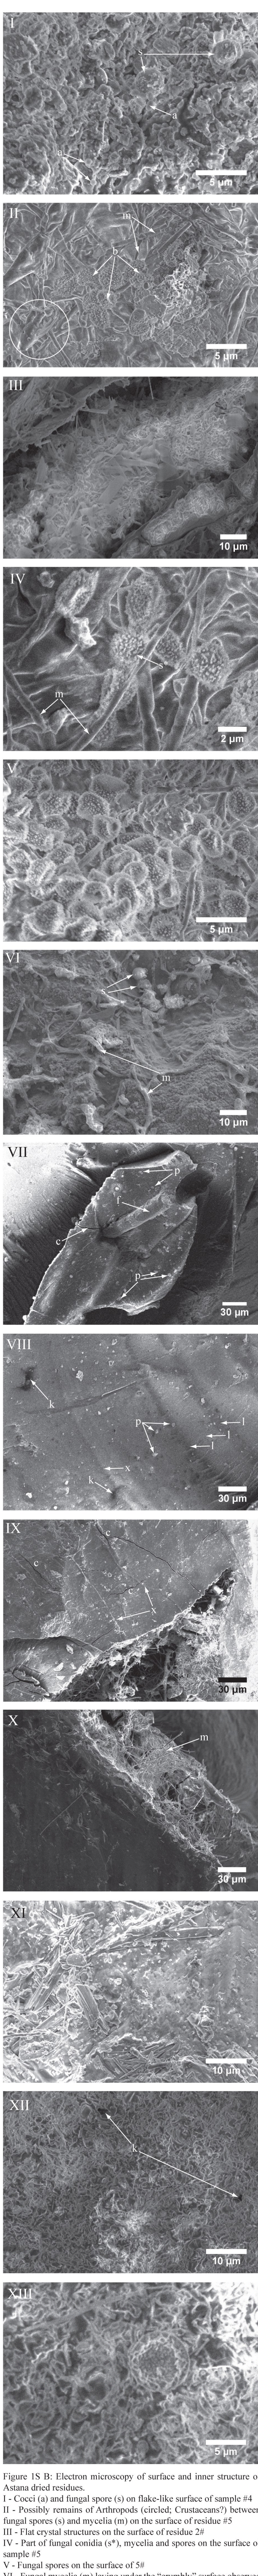

Figure 1S B: Electron microscopy of surface and inner structure of Astana dried residues.

- I - Cocci (a) and fungal spore (s) on flake-like surface of sample #4
- II - Possibly remains of Arthropods (circled; Crustaceans?) between fungal spores (s) and mycelia (m) on the surface of residue #5
- III - Flat crystal structures on the surface of residue 2#
- IV - Part of fungal conidia (s\*), mycelia and spores on the surface of sample #5
- V - Fungal spores on the surface of 5#
- VI - Fungal mycelia (m) laying under the “crumbly” surface observed only for residue 8#. Mycelia probably were growing while the material 8# was soft. Fungal spores are designated with “s”.
- VII - 1#b residue consists of dense material with cracks (c) on the smooth almost fungi-free surface and includes small particles of unknown nature (p). A fiber (f) probably from wick could be seen incorporated into 1#b matrix.
- VIII - section of 1#b residue: dark and light layers (l), incorporated particles (p), cavities (k), trace of cutting scalpel (x)
- IX - Inner cracks (c) on a section view of dense material of residue 6#; similar structures were observed for residues 1a#, b#, 4#, 5#. Fungal mycelia (m) lays on the surface; cutting scalpel traces (x)
- X - Fungal mycelia (m) lays free on the surface of black residue 6#
- XI - Debris of unknown nature on the surface of 2#
- XII - “Folded” surface of residue 7# with a few micron cavities (k)
- XIII - 7# unknown structure on the surface of the sample
