# Supplementary material for: Open sesame: Identification of sesame oil and oil soot ink in organic deposits of Tang Dynasty lamps from Astana necropolis in China
Source: PLOS journal article supplement (doi:10.1371/journal.pone.0158636), 2017-02-24
Supplement: S6 (10.1371/journal.pone.0158636.s006) [file journal.pone.0158636.s006]

Supplementary Figure 4S : Polarized light microscopy

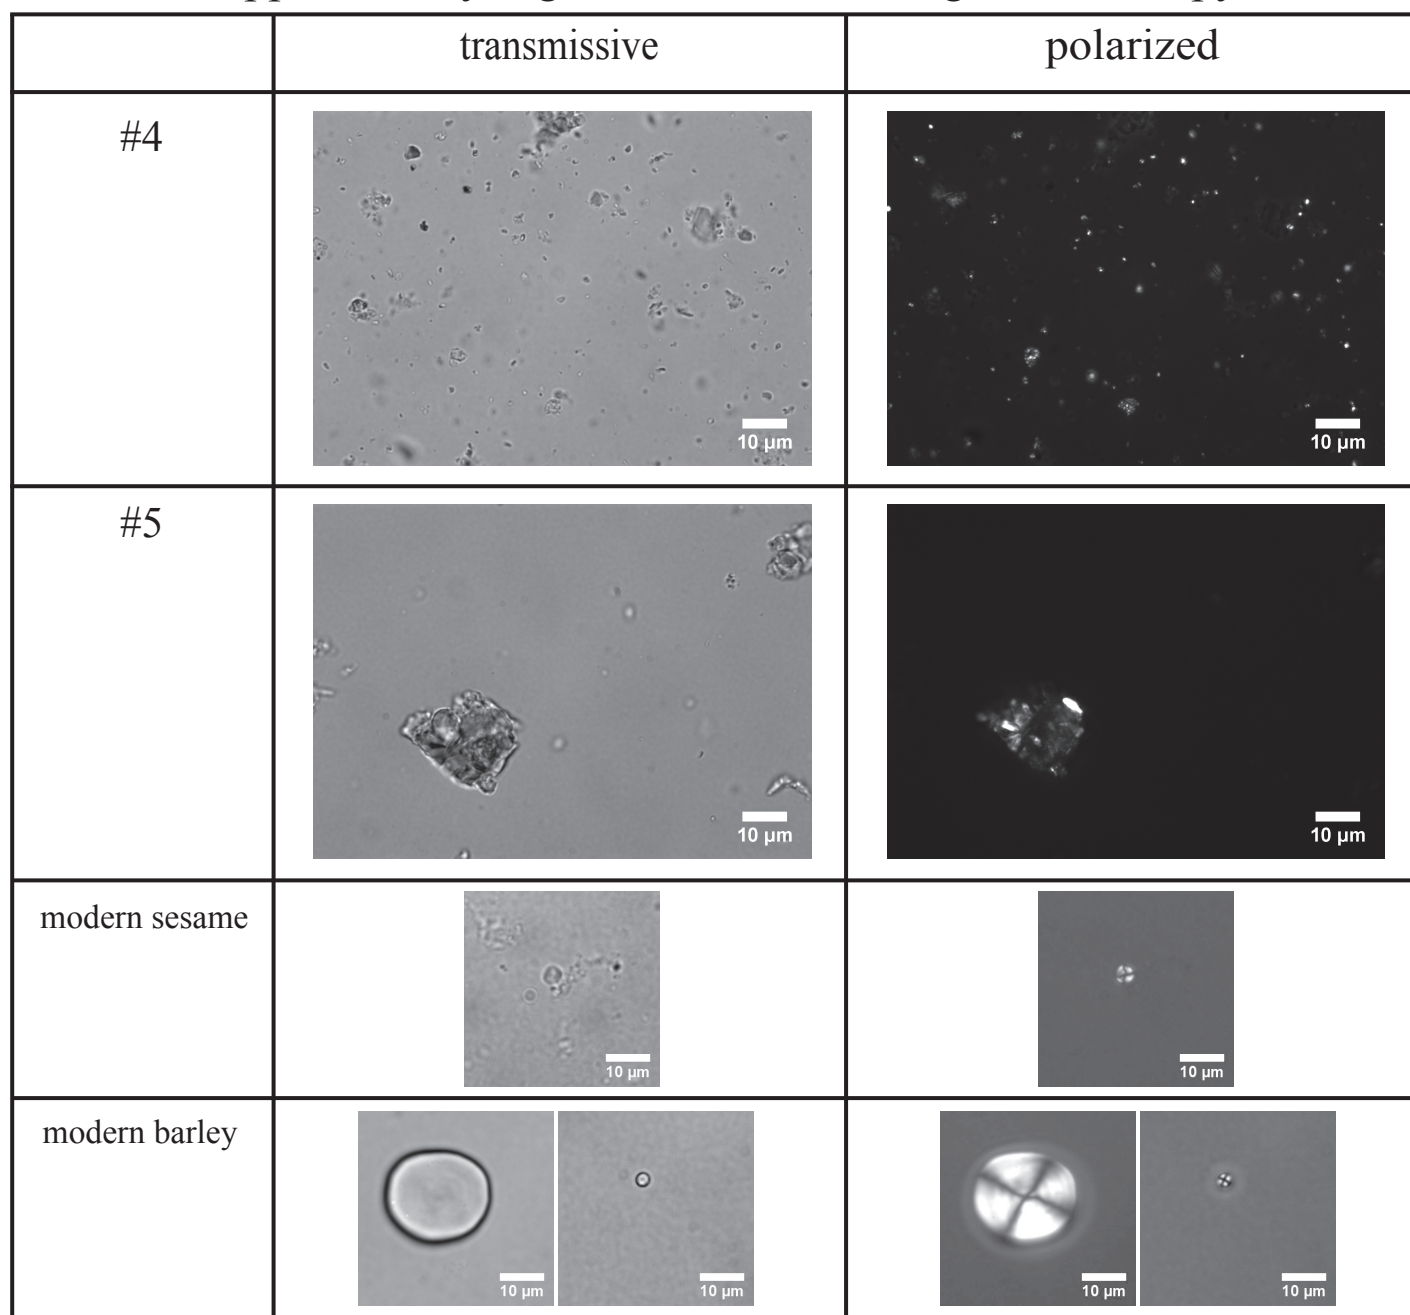

Figure 4S: Polarized light microscopy. Samples #4 and #5 are shown as typical examples. ~1-15  $\mu\text{m}$  particles of a mineral material are seen under polarized light, however no starch grains were observed. Starch grains from modern sesame and barley are shown for comparison.
