# Supplementary material for: Open sesame: Identification of sesame oil and oil soot ink in organic deposits of Tang Dynasty lamps from Astana necropolis in China
Source: PLOS journal article supplement (doi:10.1371/journal.pone.0158636), 2017-02-24
Supplement: S8 (10.1371/journal.pone.0158636.s008) [file journal.pone.0158636.s008]

Supplementary Figure 6S. FTIR analysis of Astana residues.

**A. Ancient fuels**

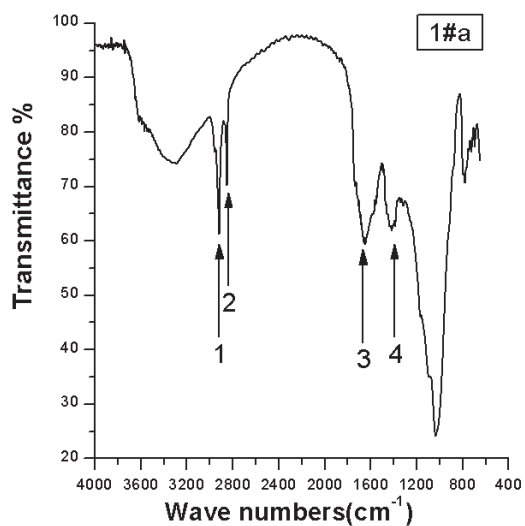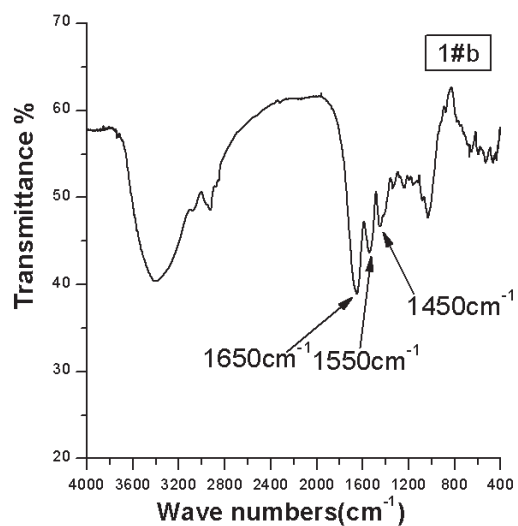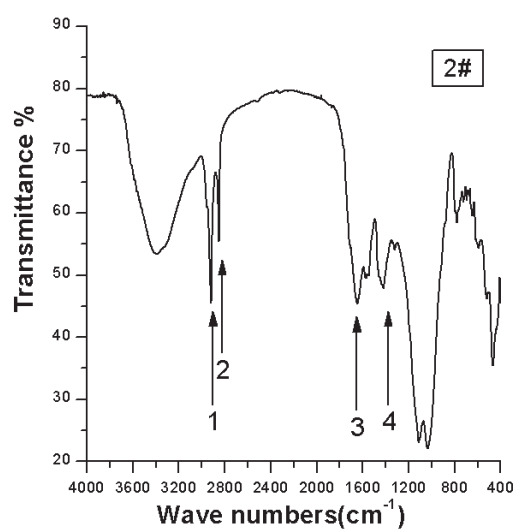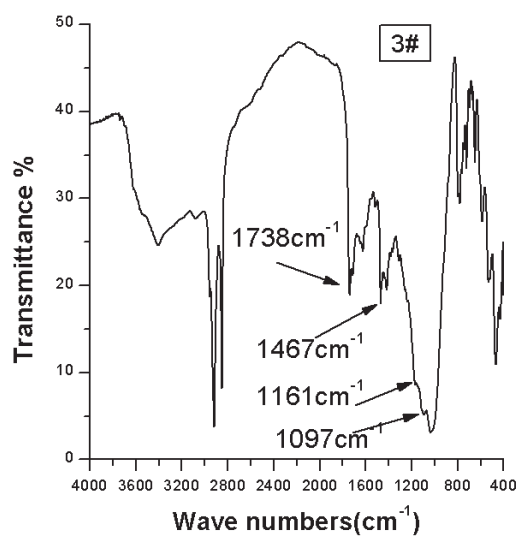

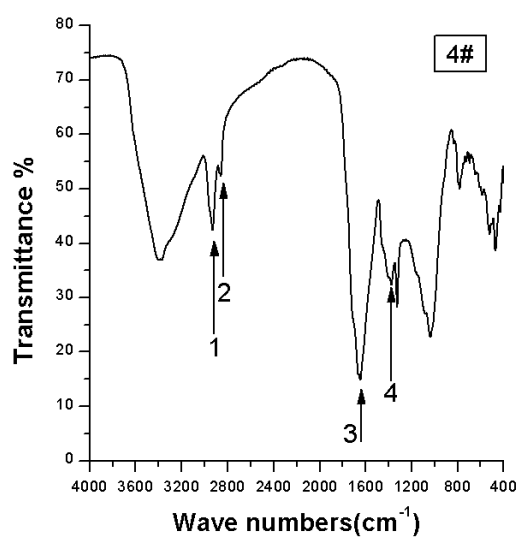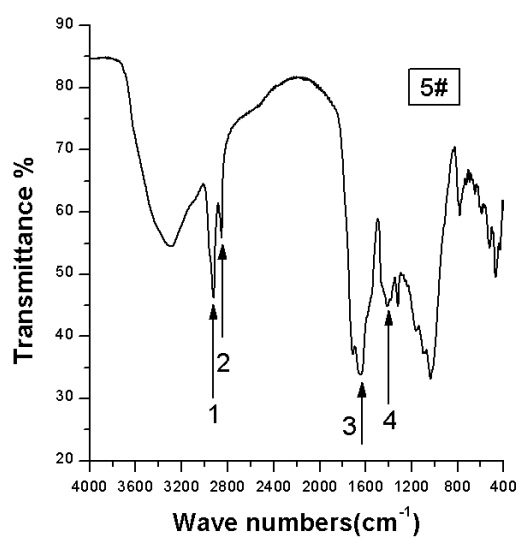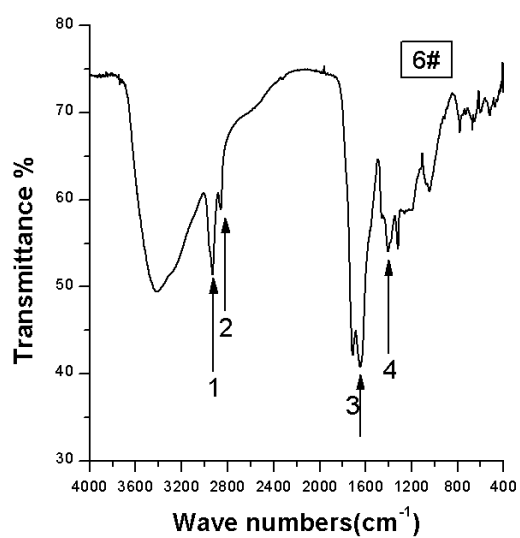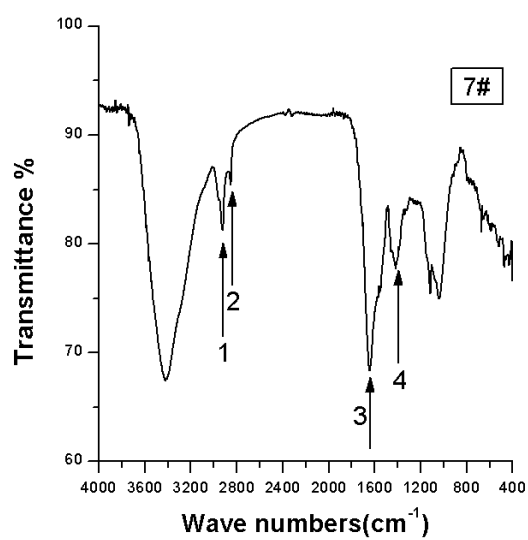

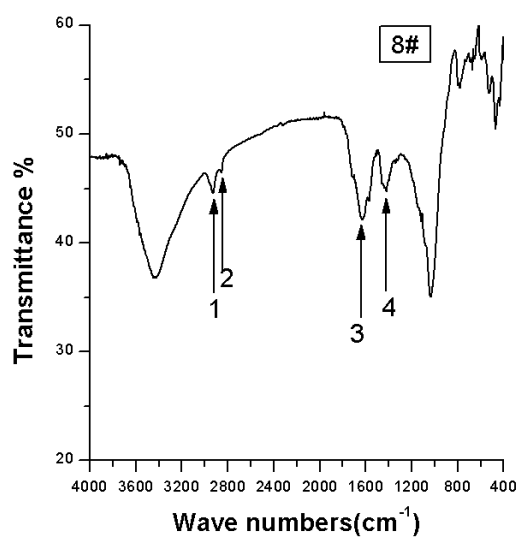

## B. Ancient wick fibers

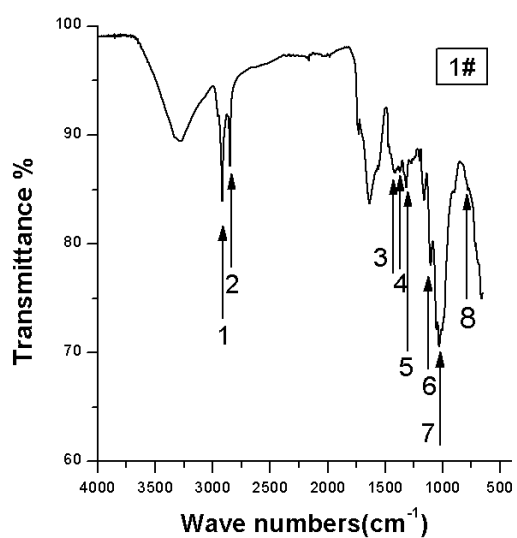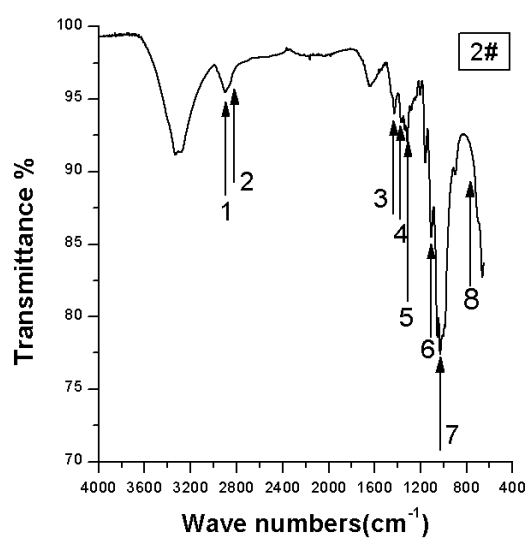

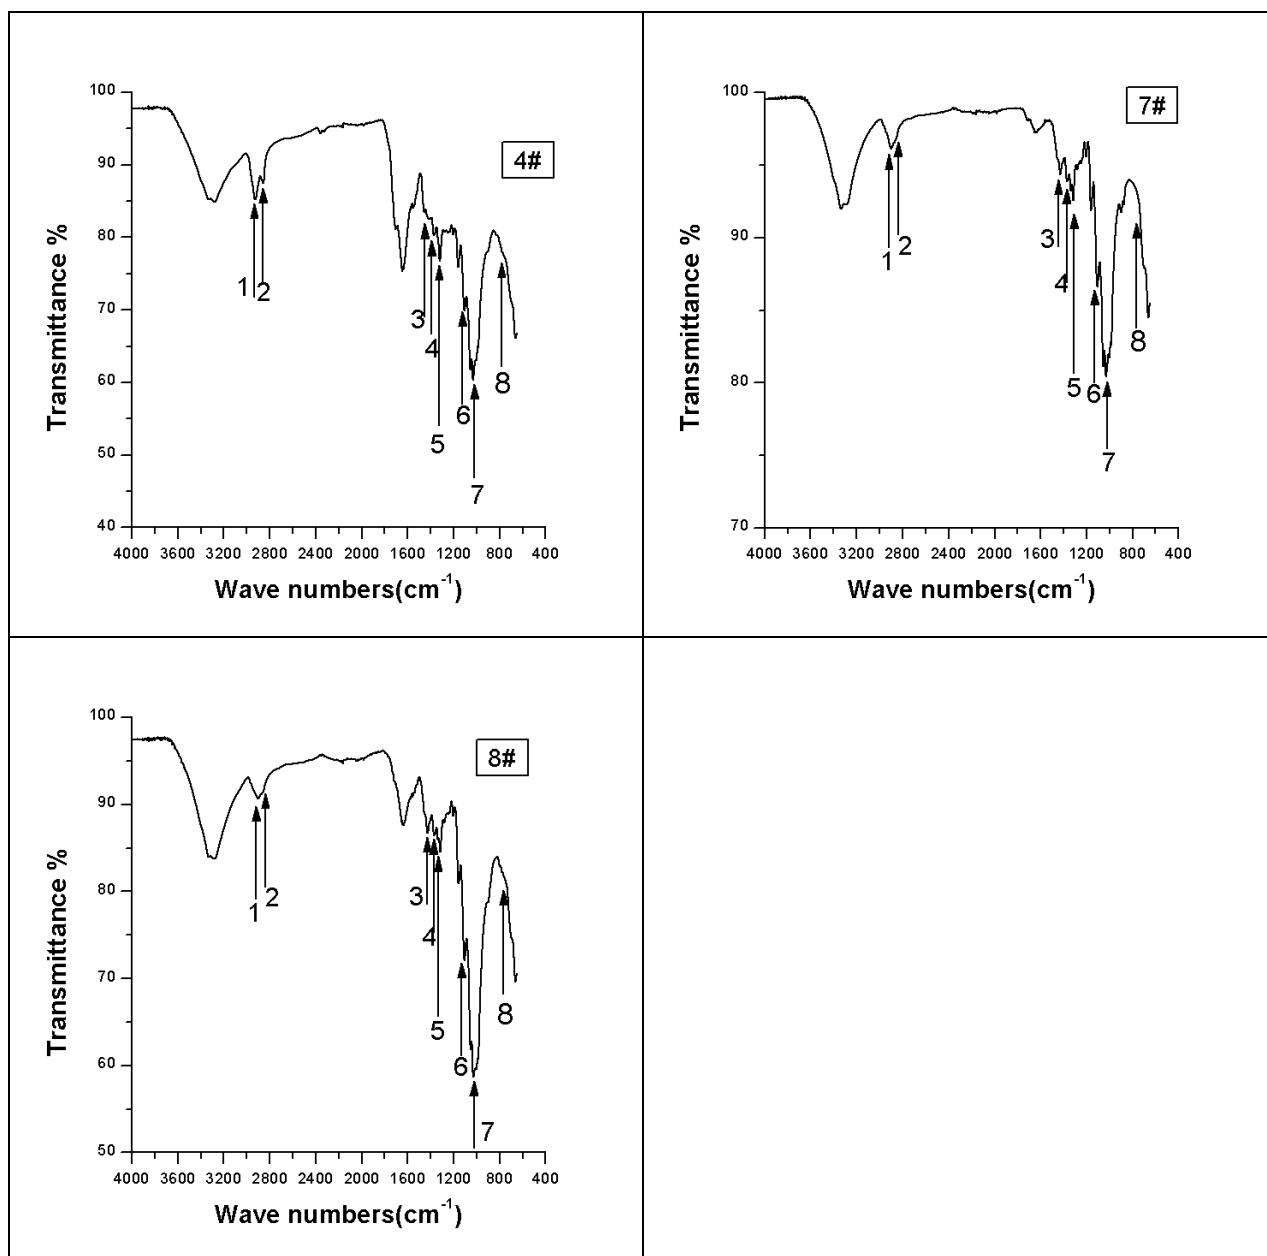

**A: Ancient fuels.** Spectrum of sample 1#b shows protein-characteristic amid signals: amide I band at  $1650\text{ cm}^{-1}$ , amide II band at  $1550\text{ cm}^{-1}$  and amide III band at  $1450\text{ cm}^{-1}$ .

Spectrum of sample 3# shows fat-typical signals at  $1738\text{ cm}^{-1}$ ,  $1467\text{ cm}^{-1}$ ,  $1161\text{ cm}^{-1}$  and  $1097\text{ cm}^{-1}$  corresponding respectively to ester group in triacylglycerol, bending vibrations of the CH<sub>2</sub> and CH<sub>3</sub> aliphatic groups, stretching vibrations of the C-O group in esters and C-H bending vibrations of fatty acids. Spectra of samples 1#a, 4#, 5# and 6# look similar and present signals typical for organic material burnt to different degree (Oudemans, Boon et al. 2007).

**B: Ancient wick fibers.** All Astana wick fibers show characteristic cellulose peaks at 2920, 2851, 1417, 1370, 1317, 1115, 1037 and  $779\text{ cm}^{-1}$  (Liu 2010).
